# Supplementary material for: Cell-Type Independent MYC Target Genes Reveal a Primordial Signature Involved in Biomass Accumulation
Source: PLoS One. 2011 Oct 19;6(10):e26057. doi: 10.1371/journal.pone.0026057 (PMC3198433; doi:10.1371/journal.pone.0026057)
Supplement: Table S2 — Detailed ChIP-chip, ChIP-seq and gene expression data analysis results. (XLS) [file pone.0026057.s006.xls]

## Sheet: hg18_Combined_Data
#HomoloGene_ID	Entrez_ID	Gene	RefSeq	Chr	strand	TSS	TES	CDSS	CDSE	P493_logFC_U133	P493_AveExpr_U133	P493_t_U133	P493_P.Value_U133	P493_adj.P.Val_U133	P493_B_U133	Trophoblast_logFC_Agilent	Trophoblast_AveExpr_Agilent	Trophoblast_t_Agilent	Trophoblast_P.Value_Agilent	Trophoblast_adj.P.Val_Agilent	Trophoblast_B_Agilent	ExonArray_Transcript_id	ExonAll_logFC	ExonAll_AveExpr	ExonAll_t	ExonAll_P.Value	ExonAll_adj.P.Val	ExonAll_B	ExonNRO_logFC	ExonNRO_AveExpr	ExonNRO_t	ExonNRO_P.Value	ExonNRO_adj.P.Val	ExonNRO_B	ExonTotal_logFC	ExonTotal_AveExpr	ExonTotal_t	ExonTotal_P.Value	ExonTotal_adj.P.Val	ExonTotal_B	ExonNRO+	ExonNRO?	ExonNRO-	ExonTotal+	ExonTotal?	ExonTotal-	ExonAll+	ExonAll?	ExonAll-
-1	375260	FAM39B	NM_198943	1	1	4268	14753	4558	14748	-1000	-1000	-1000	-1000	-1000	-1000	-1000	-1000	-1000	-1000	-1000	-1000	-1000	-1000	-1000	-1000	-1000	-1000	-1000	-1000	-1000	-1000	-1000	-1000	-1000	-1000	-1000	-1000	-1000	-1000	-1000	0	1	0	0	1	0	0	1	0
-1	349338	FLJ00038	NM_182905	1	1	4558	7172	4558	7172	-1000	-1000	-1000	-1000	-1000	-1000	0.168324	7.05627	0.631646	0.56	0.77986	-6.43824	2501544	-0.628616	9.55136	-5.34274	0.000833	0.00206	-1.0665	-0.616197	11.649	-6.58539	9.27e-05	0.000255	1.03436	-0.671013	9.78003	-7.5873	4.9e-05	0.000172	1.8642	0	0	1	0	0	1	0	0	1
88360	79501	OR4F5	NM_001005484	1	0	58953	59870	58953	59870	-1000	-1000	-1000	-1000	-1000	-1000	-0.3965	3.18829	-0.774315	0.479	0.726451	-6.32935	3814836	0.060615	4.56847	0.122034	-1000	-1000	-1000	0.0573478	3.96612	0.207543	-1000	-1000	-1000	-0.384557	4.30829	-1.33368	-1000	-1000	-1000	0	1	0	0	1	0	0	1	0
-1	26683	OR4F29	NM_001005221	1	0	357521	358457	357521	358457	-0.0393641	6.66183	-0.257545	0.801	0.902	-7.46256	-1000	-1000	-1000	-1000	-1000	-1000	2315251	1.30615	5.06924	3.02754	-1000	-1000	-1000	1.30251	4.11131	4.37932	-1000	-1000	-1000	0.774222	4.4994	2.43491	-1000	-1000	-1000	0	1	0	0	1	0	0	1	0
88429	81399	OR4F3	NM_001005224	1	0	357521	358457	357521	358457	-0.0393641	6.66183	-0.257545	0.801	0.902	-7.46256	-1000	-1000	-1000	-1000	-1000	-1000	2315251	1.30615	5.06924	3.02754	-1000	-1000	-1000	1.30251	4.11131	4.37932	-1000	-1000	-1000	0.774222	4.4994	2.43491	-1000	-1000	-1000	0	1	0	0	1	0	0	1	0
-1	135896	OR4F16	NM_001005277	1	0	357521	358457	357521	358457	-1000	-1000	-1000	-1000	-1000	-1000	-1000	-1000	-1000	-1000	-1000	-1000	2315251	1.30615	5.06924	3.02754	-1000	-1000	-1000	1.30251	4.11131	4.37932	-1000	-1000	-1000	0.774222	4.4994	2.43491	-1000	-1000	-1000	0	1	0	0	1	0	0	1	0
-1	26683	OR4F29	NM_001005221	1	1	610960	611896	610960	611896	-0.0393641	6.66183	-0.257545	0.801	0.902	-7.46256	-1000	-1000	-1000	-1000	-1000	-1000	2315251	1.30615	5.06924	3.02754	-1000	-1000	-1000	1.30251	4.11131	4.37932	-1000	-1000	-1000	0.774222	4.4994	2.43491	-1000	-1000	-1000	0	1	0	0	1	0	0	1	0
88429	81399	OR4F3	NM_001005224	1	1	610960	611896	610960	611896	-0.0393641	6.66183	-0.257545	0.801	0.902	-7.46256	-1000	-1000	-1000	-1000	-1000	-1000	2315251	1.30615	5.06924	3.02754	-1000	-1000	-1000	1.30251	4.11131	4.37932	-1000	-1000	-1000	0.774222	4.4994	2.43491	-1000	-1000	-1000	0	1	0	0	1	0	0	1	0
-1	135896	OR4F16	NM_001005277	1	1	610960	611896	610960	611896	-1000	-1000	-1000	-1000	-1000	-1000	-1000	-1000	-1000	-1000	-1000	-1000	2315251	1.30615	5.06924	3.02754	-1000	-1000	-1000	1.30251	4.11131	4.37932	-1000	-1000	-1000	0.774222	4.4994	2.43491	-1000	-1000	-1000	0	1	0	0	1	0	0	1	0
34983	148398	SAMD11	NM_152486	1	0	850983	869824	851184	869395	-0.0684653	7.09356	-0.749318	0.467	0.681	-7.20334	2.71749	7.44889	4.23193	0.0116	0.178429	-2.49617	4054639	1.99188	10.132	16.9363	2.75e-07	7.88e-06	7.65181	1.55231	11.1214	19.0373	1.11e-08	4.48e-07	10.6998	1.57234	10.3831	19.8088	2.39e-08	1.36e-06	10.0321	1	0	0	1	0	0	1	0	0
6980	26155	NOC2L	NM_015658	1	1	869458	884493	869936	884482	1.45508	8.71532	13.8899	2.51e-09	1.58e-07	11.8567	-0.657138	10.1076	-2.70045	0.0504	0.293176	-4.11455	4054639	1.99188	10.132	16.9363	2.75e-07	7.88e-06	7.65181	1.55231	11.1214	19.0373	1.11e-08	4.48e-07	10.6998	1.57234	10.3831	19.8088	2.39e-08	1.36e-06	10.0321	1	0	0	1	0	0	1	0	0
27075	339451	KLHL17	NM_198317	1	0	885829	890957	885936	890433	-0.252456	6.37321	-2.03873	0.0618	0.171	-5.55977	0.797444	6.08703	1.55208	0.191	0.48663	-5.51429	4053462	0.253074	7.33802	1.78093	0.115	0.153	-6.23317	0.0797343	9.29461	0.967099	0.358	0.409	-7.30866	0.154363	7.98962	2.50726	0.0352	0.052	-5.14758	0	1	0	0	1	0	0	1	0
12949	84069	PLEKHN1	NM_032129	1	0	891739	900340	891774	899817	0.149582	7.28285	0.984489	0.342	0.57	-6.99673	0.220446	8.15467	0.310388	0.771	0.901541	-6.61186	4053495	0.14289	7.03906	0.64613	0.537	0.588	-7.49962	0.0678115	7.41344	0.487209	0.638	0.68	-7.67194	-0.116702	7.40701	-1.18866	0.267	0.32	-7.03804	0	1	0	0	1	0	0	1	0
49659	57801	HES4	NM_021170	1	1	924207	925332	924301	925215	0.195682	6.94921	1.81683	0.0917	0.232	-5.91799	0.358943	10.1791	1.26409	0.271	0.562259	-5.84761	4054690	0.0785917	6.95711	0.309306	-1000	-1000	-1000	-0.0295287	7.71543	-0.177987	0.863	0.884	-7.78417	0.025791	7.81209	0.153262	0.882	0.902	-7.75424	0	1	0	0	1	0	0	1	0
48326	9636	ISG15	NM_005101	1	0	938741	939775	938816	939720	-2.25485	11.2172	-7.80651	2.44e-06	3.19e-05	4.72808	0.405221	12.4987	0.576177	0.593	0.800574	-6.47567	4053534	-2.15863	9.34022	-11.8689	3.7e-06	3.48e-05	4.8683	-0.767109	10.7924	-2.97524	0.0153	0.0241	-4.37415	-0.948838	12.298	-5.43513	0.000524	0.00124	-0.708828	0	0	1	0	0	1	0	0	1
27907	375790	AGRIN	NM_198576	1	0	945365	981354	945415	980223	0.501973	8.86957	5.23189	0.000148	0.00102	0.463789	0.407634	9.02565	1.33053	0.25	0.545466	-5.77298	-1000	-1000	-1000	-1000	-1000	-1000	-1000	-1000	-1000	-1000	-1000	-1000	-1000	-1000	-1000	-1000	-1000	-1000	-1000	0	1	0	0	1	0	0	1	0
84818	54991	C1orf159	NM_017891	1	1	1007067	1041331	1008135	1012420	0.137723	7.36196	2.02132	0.0637	0.175	-5.5887	0.862706	6.56271	2.80351	0.0451	0.281617	-3.99367	2391005	-0.144512	7.28899	-0.567254	0.587	0.636	-7.55117	0.0547455	8.27065	0.392597	0.704	0.741	-7.71706	0.35653	6.88694	1.25232	0.244	0.296	-6.96435	0	1	0	0	1	0	0	1	0
51912	254173	TTLL10	NM_153254	1	0	1104939	1111103	1105296	1110384	0.10815	7.38494	1.17233	0.262	0.482	-6.7972	-0.114784	2.36802	-0.463511	0.666	0.844237	-6.54246	2315554	0.842906	3.65139	1.14054	-1000	-1000	-1000	-0.000872	4.79432	-0.0026972	-1000	-1000	-1000	-0.114863	4.74479	-0.301019	-1000	-1000	-1000	0	1	0	0	1	0	0	1	0
48270	8784	TNFRSF18	NM_148901	1	1	1128751	1131951	1128833	1131813	-0.198076	7.68203	-0.901715	0.383	0.609	-7.07514	-0.696469	4.77718	-2.97398	0.0377	0.26251	-3.79718	2391150	0.645441	7.68202	5.59873	0.000623	0.00162	-0.749609	0.430061	8.06372	4.3364	0.00181	0.00348	-2.14763	0.140691	9.35883	2.06211	0.0714	0.0986	-5.84632	1	0	0	0	1	0	1	0	0
48270	8784	TNFRSF18	NM_004195	1	1	1128751	1131951	1129086	1131813	-0.198076	7.68203	-0.901715	0.383	0.609	-7.07514	-0.696469	4.77718	-2.97398	0.0377	0.26251	-3.79718	2391150	0.645441	7.68202	5.59873	0.000623	0.00162	-0.749609	0.430061	8.06372	4.3364	0.00181	0.00348	-2.14763	0.140691	9.35883	2.06211	0.0714	0.0986	-5.84632	1	0	0	0	1	0	1	0	0
48270	8784	TNFRSF18	NM_148902	1	1	1128751	1131951	1129086	1131813	-0.198076	7.68203	-0.901715	0.383	0.609	-7.07514	-0.696469	4.77718	-2.97398	0.0377	0.26251	-3.79718	2391150	0.645441	7.68202	5.59873	0.000623	0.00162	-0.749609	0.430061	8.06372	4.3364	0.00181	0.00348	-2.14763	0.140691	9.35883	2.06211	0.0714	0.0986	-5.84632	1	0	0	0	1	0	1	0	0
2496	7293	TNFRSF4	NM_003327	1	1	1136569	1139374	1136797	1139369	0.71036	8.28517	3.06943	0.00871	0.0339	-3.68098	0.203914	4.08096	0.868346	0.431	0.688969	-6.24857	2391172	0.351096	8.0181	1.33868	0.22	0.271	-6.82068	-0.02896	9.51523	-0.287924	0.78	0.81	-7.75599	0.641119	8.26755	5.58768	0.000435	0.00105	-0.506598	0	1	0	1	0	0	0	1	0
32121	51150	SDF4	NM_016176	1	1	1142151	1157243	1142754	1154035	0.430281	8.01785	4.01726	0.00139	0.00699	-1.836	0.186563	11.1618	0.804997	0.463	0.713704	-6.30373	2391188	0.44044	8.85334	2.7431	0.0267	0.0424	-4.78042	0.229391	10.5436	1.71989	0.119	0.154	-6.38271	-0.144149	10.4827	-1.44828	0.184	0.23	-6.72174	0	1	0	0	1	0	1	0	0
32121	51150	SDF4	NM_016547	1	1	1142176	1157273	1142912	1154035	0.430281	8.01785	4.01726	0.00139	0.00699	-1.836	0.186563	11.1618	0.804997	0.463	0.713704	-6.30373	2391188	0.44044	8.85334	2.7431	0.0267	0.0424	-4.78042	0.229391	10.5436	1.71989	0.119	0.154	-6.38271	-0.144149	10.4827	-1.44828	0.184	0.23	-6.72174	0	1	0	0	1	0	1	0	0
14549	126792	B3GALT6	NM_080605	1	0	1157491	1160280	1157521	1158510	0.823293	9.13686	8.69026	7.27e-07	1.18e-05	5.99196	0.626116	10.2047	2.66434	0.0524	0.297903	-4.15725	2315633	1.08897	8.8614	5.88336	0.000456	0.00124	-0.40775	1.2014	8.98061	7.98017	2.03e-05	7.12e-05	2.67813	0.482619	9.83017	3.96284	0.00377	0.00695	-2.82782	1	0	0	1	0	0	1	0	0
10975	118424	UBE2J2	NM_194457	1	1	1179156	1199096	1180445	1188603	0.357347	8.68441	4.25709	0.00088	0.00473	-1.37157	0.271964	7.9231	1.14865	0.311	0.593928	-5.97305	2391255	0.42873	9.01192	3.34269	0.011	0.0194	-3.85689	0.229539	8.90814	1.61791	0.14	0.177	-6.52715	-0.291544	10.4505	-2.52847	0.034	0.0505	-5.11362	0	1	0	0	1	0	1	0	0
10975	118424	UBE2J2	NM_194458	1	1	1179156	1199096	1180445	1188603	0.357347	8.68441	4.25709	0.00088	0.00473	-1.37157	0.271964	7.9231	1.14865	0.311	0.593928	-5.97305	2391255	0.42873	9.01192	3.34269	0.011	0.0194	-3.85689	0.229539	8.90814	1.61791	0.14	0.177	-6.52715	-0.291544	10.4505	-2.52847	0.034	0.0505	-5.11362	0	1	0	0	1	0	1	0	0
10975	118424	UBE2J2	NM_058167	1	1	1179156	1199096	1180445	1193234	0.357347	8.68441	4.25709	0.00088	0.00473	-1.37157	0.271964	7.9231	1.14865	0.311	0.593928	-5.97305	2391255	0.42873	9.01192	3.34269	0.011	0.0194	-3.85689	0.229539	8.90814	1.61791	0.14	0.177	-6.52715	-0.291544	10.4505	-2.52847	0.034	0.0505	-5.11362	0	1	0	0	1	0	1	0	0
10975	118424	UBE2J2	NM_194315	1	1	1179156	1199096	1180445	1193234	0.357347	8.68441	4.25709	0.00088	0.00473	-1.37157	0.271964	7.9231	1.14865	0.311	0.593928	-5.97305	2391255	0.42873	9.01192	3.34269	0.011	0.0194	-3.85689	0.229539	8.90814	1.61791	0.14	0.177	-6.52715	-0.291544	10.4505	-2.52847	0.034	0.0505	-5.11362	0	1	0	0	1	0	1	0	0
48152	6339	SCNN1D	NM_002978	1	0	1207438	1217271	1209267	1216852	0.0214763	6.25564	0.200111	0.844	0.925	-7.47659	-0.669883	6.8555	-1.32244	0.252	0.547198	-5.78215	2315674	-0.168502	8.57609	-0.283216	0.785	0.817	-7.68413	-0.114627	11.4859	-0.402265	0.697	0.735	-7.71288	-1.37365	9.75922	-6.37942	0.000173	0.000483	0.492099	0	1	0	0	0	1	0	1	0
23708	116983	CENTB5	NM_030649	1	1	1218806	1228502	1218806	1228502	0.163401	7.19822	1.39382	0.186	0.385	-6.52635	0.651537	4.12786	2.57923	0.0575	0.309219	-4.25857	2391302	-0.00219433	8.49313	-0.0142342	0.989	0.991	-7.7291	0.140238	10.6538	1.72923	0.117	0.152	-6.36925	-0.00232625	8.47492	-0.0229654	0.982	0.985	-7.76705	0	1	0	0	1	0	0	1	0
13655	126789	PUSL1	NM_153339	1	0	1233856	1236918	1233886	1236621	1.08002	7.44802	11.5763	2.4e-08	8.2e-07	9.53227	0.0690273	11.0748	0.28134	0.792	0.911181	-6.62208	2315739	0.719102	8.3182	4.11243	0.00381	0.00767	-2.71906	0.458221	9.06619	2.75992	0.0217	0.0332	-4.73394	0.47753	8.99313	3.49552	0.00753	0.013	-3.55859	1	0	0	1	0	0	1	0	0
9894	54973	CPSF3L	NM_017871	1	1	1236827	1249908	1237101	1249850	0.526864	5.58169	5.55493	8.4e-05	0.00063	1.04781	-0.294651	9.22552	-1.06178	0.345	0.620297	-6.06332	2391360	0.675339	9.36568	5.78757	0.000506	0.00135	-0.521583	0.46063	10.562	5.45512	0.000378	0.000865	-0.477561	0.47753	8.99313	3.49552	0.00753	0.013	-3.55859	1	0	0	1	0	0	1	0	0
11550	80772	MGC10334	NM_001029885	1	0	1250005	1254137	1252153	1253005	-0.107347	7.79997	-1.2811	0.222	0.434	-6.66876	-0.492212	11.9687	-1.42561	0.223	0.520338	-5.66359	4044083	0.64751	6.90721	1.74408	0.121	0.161	-6.28516	-0.642667	7.7059	-5.06774	0.000637	0.00137	-1.03624	-0.157036	8.05563	-1.80701	0.107	0.141	-6.22712	0	0	1	0	1	0	0	1	0
12890	83756	TAS1R3	NM_152228	1	0	1256588	1259705	1256588	1259705	-1000	-1000	-1000	-1000	-1000	-1000	-1000	-1000	-1000	-1000	-1000	-1000	-1000	-1000	-1000	-1000	-1000	-1000	-1000	-1000	-1000	-1000	-1000	-1000	-1000	-1000	-1000	-1000	-1000	-1000	-1000	0	1	0	0	1	0	0	1	0
20926	1855	DVL1	NM_004421	1	1	1260521	1274354	1261384	1274307	1.62131	7.87438	13.5335	3.47e-09	1.99e-07	11.5231	0.760864	7.70634	2.70685	0.0501	0.292489	-4.107	2391425	1.18695	8.45566	7.25134	0.000116	0.000411	1.09271	1.06377	9.55163	11.6413	8.48e-07	6.4e-06	6.10226	1.07474	8.59699	8.60683	1.9e-05	8.27e-05	2.89829	1	0	0	1	0	0	1	0	0
20926	1855	DVL1	NM_182779	1	1	1260521	1274377	1261384	1274307	1.62131	7.87438	13.5335	3.47e-09	1.99e-07	11.5231	0.760864	7.70634	2.70685	0.0501	0.292489	-4.107	-1000	-1000	-1000	-1000	-1000	-1000	-1000	-1000	-1000	-1000	-1000	-1000	-1000	-1000	-1000	-1000	-1000	-1000	-1000	0	1	0	0	1	0	0	1	0
20926	1855	DVL1	NM_181870	1	1	1260521	1274622	1261384	1264926	-1000	-1000	-1000	-1000	-1000	-1000	0.760864	7.70634	2.70685	0.0501	0.292489	-4.107	-1000	-1000	-1000	-1000	-1000	-1000	-1000	-1000	-1000	-1000	-1000	-1000	-1000	-1000	-1000	-1000	-1000	-1000	-1000	0	1	0	0	1	0	0	1	0
11500	54587	MXRA8	NM_032348	1	1	1277934	1283777	1278846	1283746	0.0541572	5.55073	0.54244	0.596	0.778	-7.34208	2.53823	11.6822	7.87542	0.00106	0.10958	0.0156502	2391465	0.069925	6.64357	0.283004	-1000	-1000	-1000	-0.141968	6.72988	-0.96211	-1000	-1000	-1000	-0.182875	6.69039	-0.93964	-1000	-1000	-1000	0	1	0	0	1	0	0	1	0
11916	54998	AURKAIP1	NM_017900	1	1	1298972	1300442	1299043	1299998	1.06693	10.5383	12.0305	1.5e-08	5.66e-07	10.0201	-0.318281	12.5079	-1.14101	0.314	0.596399	-5.98115	2391514	1.09734	10.2674	7.43981	9.79e-05	0.000359	1.28249	1.18219	9.86745	7.36882	3.84e-05	0.000122	1.98556	0.241092	11.9066	2.97151	0.0169	0.0267	-4.39928	1	0	0	1	0	0	1	0	0
69477	81669	CCNL2	NM_001039577	1	1	1310954	1324551	1318024	1324548	-0.380184	8.85866	-4.77429	0.000336	0.00206	-0.38542	1.62921	7.77691	2.98361	0.0373	0.261621	-3.78622	4041923	-0.62796	11.0499	-4.21261	0.00334	0.00683	-2.57648	-0.349135	11.8427	-2.23197	0.052	0.0733	-5.5999	-0.326245	9.24684	-2.79012	0.0225	0.0346	-4.69239	0	1	0	0	0	1	0	0	1
69477	81669	CCNL2	NM_030937	1	1	1310954	1324552	1312473	1324548	-0.380184	8.85866	-4.77429	0.000336	0.00206	-0.38542	-0.515113	8.5959	-1.40288	0.229	0.52612	-5.68999	4041923	-0.62796	11.0499	-4.21261	0.00334	0.00683	-2.57648	-0.349135	11.8427	-2.23197	0.052	0.0733	-5.5999	-0.326245	9.24684	-2.79012	0.0225	0.0346	-4.69239	0	1	0	0	0	1	0	0	1
-1	55052	MRPL20	NM_017971	1	1	1327159	1332523	1327325	1332459	0.61637	10.3234	7.73361	2.71e-06	3.46e-05	4.61952	-0.578584	12.4315	-2.53562	0.0604	0.315026	-4.31083	2391563	1.26755	9.56148	6.32602	0.000286	0.000846	0.102769	1.03612	10.8634	6.17626	0.000151	0.000387	0.506921	0.207886	10.6528	1.75349	0.116	0.152	-6.30435	1	0	0	0	1	0	1	0	0
11270	64856	VWA1	NM_022834	1	0	1360771	1366007	1360991	1365029	-0.0887373	4.8141	-0.819855	0.427	0.649	-7.14666	1.41949	11.1721	4.75122	0.00761	0.15949	-2.03518	2315894	1.12008	6.03087	2.80511	-1000	-1000	-1000	0.0245605	6.74018	0.171205	-1000	-1000	-1000	1.20112	5.89097	2.8525	-1000	-1000	-1000	0	1	0	0	1	0	0	1	0
11270	64856	VWA1	NM_199121	1	0	1360771	1366007	1364328	1365029	-0.0887373	4.8141	-0.819855	0.427	0.649	-7.14666	1.41949	11.1721	4.75122	0.00761	0.15949	-2.03518	2315894	1.12008	6.03087	2.80511	-1000	-1000	-1000	0.0245605	6.74018	0.171205	-1000	-1000	-1000	1.20112	5.89097	2.8525	-1000	-1000	-1000	0	1	0	0	1	0	0	1	0
-1	219293	ATAD3C	NM_001039211	1	0	1387909	1395400	1387914	1393957	2.001	8.72625	13.3592	4.09e-09	2.23e-07	11.357	0.219472	10.1998	0.904388	0.414	0.675744	-6.21589	2315918	0.755522	5.96618	2.69106	-1000	-1000	-1000	0.652128	6.28316	3.13103	-1000	-1000	-1000	-0.162737	6.15152	-0.654753	-1000	-1000	-1000	0	1	0	0	1	0	0	1	0
105511	83858	ATAD3B	NM_031921	1	0	1397026	1421443	1397127	1421059	1.26518	9.07113	14.6925	1.24e-09	9.45e-08	12.5788	-0.436587	7.88884	-1.65715	0.168	0.462663	-5.38773	2315951	2.32405	8.93958	20.2004	7.43e-08	4.53e-06	9.00858	2.23317	10.5408	16.8102	3.36e-08	8.46e-07	9.53877	2.04432	9.02568	25.3142	3.14e-09	6.15e-07	12.0793	1	0	0	1	0	0	1	0	0
10059	55210	ATAD3A	NM_018188	1	0	1437417	1459926	1437511	1459314	1.29065	8.98015	14.0116	2.25e-09	1.45e-07	11.9687	-0.666144	9.95469	-2.95125	0.0386	0.265405	-3.82313	2315951	2.32405	8.93958	20.2004	7.43e-08	4.53e-06	9.00858	2.23317	10.5408	16.8102	3.36e-08	8.46e-07	9.53877	2.04432	9.02568	25.3142	3.14e-09	6.15e-07	12.0793	1	0	0	1	0	0	1	0	0
6754	29101	SSU72	NM_014188	1	1	1466916	1500124	1467308	1499799	0.44316	7.10931	5.07302	0.000196	0.0013	0.171754	0.040511	11.7428	0.158277	0.881	0.953428	-6.65453	2391647	0.338211	10.1667	2.65339	0.0306	0.0477	-4.91954	0.437143	10.4914	2.55487	0.0305	0.0452	-5.07423	-0.269597	11.127	-3.80563	0.00474	0.00856	-3.07103	1	0	0	0	0	1	1	0	0
16062	142678	MIB2	NM_080875	1	0	1540746	1555846	1540873	1555772	0.424798	6.50861	4.56387	0.000496	0.00288	-0.78364	-0.124689	7.65866	-0.308475	0.772	0.902147	-6.61256	4042392	0.0241807	7.59132	0.190346	0.854	0.878	-7.70879	-0.567882	9.4738	-5.46473	0.000373	0.000856	-0.463977	-0.389871	8.18855	-3.5242	0.00721	0.0125	-3.51311	0	0	1	0	0	1	0	1	0
3424	8510	MMP23B	NM_006983	1	0	1557422	1559891	1557460	1559863	-0.212401	5.97261	-2.73626	0.0166	0.0587	-4.31508	-0.293546	8.46867	-0.903581	0.414	0.676109	-6.21664	4042278	-0.398142	8.41678	-2.19731	0.0612	0.0877	-5.62053	-0.276671	8.55488	-1.15018	0.279	0.328	-7.11761	-0.297951	8.14446	-1.64896	0.136	0.175	-6.45198	0	1	0	0	1	0	0	1	0
-1	985	CDC2L2	NM_033534	1	1	1560962	1640728	1560988	1637697	-1000	-1000	-1000	-1000	-1000	-1000	-1000	-1000	-1000	-1000	-1000	-1000	-1000	-1000	-1000	-1000	-1000	-1000	-1000	-1000	-1000	-1000	-1000	-1000	-1000	-1000	-1000	-1000	-1000	-1000	-1000	0	1	0	0	1	0	0	1	0
110780	984	CDC2L1	NM_033487	1	1	1560962	1645634	1560988	1567210	-0.169218	8.58018	-1.9213	0.0763	0.201	-5.75225	-0.18066	11.5889	-0.592712	0.583	0.793545	-6.46481	4044515	-0.366603	8.47053	-3.01276	0.0179	0.0298	-4.36283	-0.279715	10.123	-3.82672	0.00391	0.00699	-2.96254	-0.339213	10.1984	-4.81707	0.00115	0.00248	-1.56165	0	0	1	0	0	1	0	0	1
110780	984	CDC2L1	NM_033490	1	1	1560962	1645634	1560988	1567711	-1000	-1000	-1000	-1000	-1000	-1000	-1000	-1000	-1000	-1000	-1000	-1000	-1000	-1000	-1000	-1000	-1000	-1000	-1000	-1000	-1000	-1000	-1000	-1000	-1000	-1000	-1000	-1000	-1000	-1000	-1000	0	1	0	0	1	0	0	1	0
110780	984	CDC2L1	NM_033488	1	1	1560962	1645634	1560988	1643894	-0.169218	8.58018	-1.9213	0.0763	0.201	-5.75225	0.152596	8.84103	0.480402	0.655	0.83765	-6.53326	4044515	-0.366603	8.47053	-3.01276	0.0179	0.0298	-4.36283	-0.279715	10.123	-3.82672	0.00391	0.00699	-2.96254	-0.339213	10.1984	-4.81707	0.00115	0.00248	-1.56165	0	0	1	0	0	1	0	0	1
110780	984	CDC2L1	NM_033489	1	1	1560962	1645634	1560988	1643894	-0.169218	8.58018	-1.9213	0.0763	0.201	-5.75225	0.152596	8.84103	0.480402	0.655	0.83765	-6.53326	4044515	-0.366603	8.47053	-3.01276	0.0179	0.0298	-4.36283	-0.279715	10.123	-3.82672	0.00391	0.00699	-2.96254	-0.339213	10.1984	-4.81707	0.00115	0.00248	-1.56165	0	0	1	0	0	1	0	0	1
110780	984	CDC2L1	NM_033492	1	1	1560962	1645634	1560988	1644116	-0.169218	8.58018	-1.9213	0.0763	0.201	-5.75225	0.152596	8.84103	0.480402	0.655	0.83765	-6.53326	4044515	-0.366603	8.47053	-3.01276	0.0179	0.0298	-4.36283	-0.279715	10.123	-3.82672	0.00391	0.00699	-2.96254	-0.339213	10.1984	-4.81707	0.00115	0.00248	-1.56165	0	0	1	0	0	1	0	0	1
110780	984	CDC2L1	NM_033493	1	1	1560962	1645634	1560988	1644116	-0.169218	8.58018	-1.9213	0.0763	0.201	-5.75225	-1000	-1000	-1000	-1000	-1000	-1000	4044515	-0.366603	8.47053	-3.01276	0.0179	0.0298	-4.36283	-0.279715	10.123	-3.82672	0.00391	0.00699	-2.96254	-0.339213	10.1984	-4.81707	0.00115	0.00248	-1.56165	0	0	1	0	0	1	0	0	1
110780	984	CDC2L1	NM_001787	1	1	1560962	1645634	1560988	1644116	-1000	-1000	-1000	-1000	-1000	-1000	-1000	-1000	-1000	-1000	-1000	-1000	4044515	-0.366603	8.47053	-3.01276	0.0179	0.0298	-4.36283	-0.279715	10.123	-3.82672	0.00391	0.00699	-2.96254	-0.339213	10.1984	-4.81707	0.00115	0.00248	-1.56165	0	0	1	0	0	1	0	0	1
110780	984	CDC2L1	NM_033486	1	1	1560962	1645634	1560988	1644116	-0.169218	8.58018	-1.9213	0.0763	0.201	-5.75225	0.152596	8.84103	0.480402	0.655	0.83765	-6.53326	-1000	-1000	-1000	-1000	-1000	-1000	-1000	-1000	-1000	-1000	-1000	-1000	-1000	-1000	-1000	-1000	-1000	-1000	-1000	0	1	0	0	1	0	0	1	0
-1	985	CDC2L2	NM_033527	1	1	1624179	1645622	1624205	1629513	-1000	-1000	-1000	-1000	-1000	-1000	-0.268956	6.70997	-0.832622	0.449	0.702366	-6.28005	-1000	-1000	-1000	-1000	-1000	-1000	-1000	-1000	-1000	-1000	-1000	-1000	-1000	-1000	-1000	-1000	-1000	-1000	-1000	0	1	0	0	1	0	0	1	0
-1	985	CDC2L2	NM_033532	1	1	1624179	1645622	1624205	1629513	-1000	-1000	-1000	-1000	-1000	-1000	-0.268956	6.70997	-0.832622	0.449	0.702366	-6.28005	-1000	-1000	-1000	-1000	-1000	-1000	-1000	-1000	-1000	-1000	-1000	-1000	-1000	-1000	-1000	-1000	-1000	-1000	-1000	0	1	0	0	1	0	0	1	0
-1	985	CDC2L2	NM_024011	1	1	1624179	1645622	1624205	1644116	-1000	-1000	-1000	-1000	-1000	-1000	-1000	-1000	-1000	-1000	-1000	-1000	4044515	-0.366603	8.47053	-3.01276	0.0179	0.0298	-4.36283	-0.279715	10.123	-3.82672	0.00391	0.00699	-2.96254	-0.339213	10.1984	-4.81707	0.00115	0.00248	-1.56165	0	0	1	0	0	1	0	0	1
-1	985	CDC2L2	NM_033529	1	1	1624179	1645622	1624205	1644116	-1000	-1000	-1000	-1000	-1000	-1000	-1000	-1000	-1000	-1000	-1000	-1000	4044515	-0.366603	8.47053	-3.01276	0.0179	0.0298	-4.36283	-0.279715	10.123	-3.82672	0.00391	0.00699	-2.96254	-0.339213	10.1984	-4.81707	0.00115	0.00248	-1.56165	0	0	1	0	0	1	0	0	1
-1	985	CDC2L2	NM_033528	1	1	1624179	1645622	1624205	1644116	-1000	-1000	-1000	-1000	-1000	-1000	-1000	-1000	-1000	-1000	-1000	-1000	-1000	-1000	-1000	-1000	-1000	-1000	-1000	-1000	-1000	-1000	-1000	-1000	-1000	-1000	-1000	-1000	-1000	-1000	-1000	0	1	0	0	1	0	0	1	0
-1	985	CDC2L2	NM_033531	1	1	1624179	1645622	1624205	1644116	-1000	-1000	-1000	-1000	-1000	-1000	-1000	-1000	-1000	-1000	-1000	-1000	-1000	-1000	-1000	-1000	-1000	-1000	-1000	-1000	-1000	-1000	-1000	-1000	-1000	-1000	-1000	-1000	-1000	-1000	-1000	0	1	0	0	1	0	0	1	0
-1	985	CDC2L2	NM_033536	1	1	1624179	1645634	1624205	1644116	-1000	-1000	-1000	-1000	-1000	-1000	-1000	-1000	-1000	-1000	-1000	-1000	-1000	-1000	-1000	-1000	-1000	-1000	-1000	-1000	-1000	-1000	-1000	-1000	-1000	-1000	-1000	-1000	-1000	-1000	-1000	0	1	0	0	1	0	0	1	0
-1	985	CDC2L2	NM_033537	1	1	1624179	1645634	1624205	1644116	-1000	-1000	-1000	-1000	-1000	-1000	-1000	-1000	-1000	-1000	-1000	-1000	-1000	-1000	-1000	-1000	-1000	-1000	-1000	-1000	-1000	-1000	-1000	-1000	-1000	-1000	-1000	-1000	-1000	-1000	-1000	0	1	0	0	1	0	0	1	0
-1	9906	SLC35E2	NM_182838	1	1	1653540	1667290	1653753	1660855	-1.15923	10.1476	-10.81	5.53e-08	1.53e-06	8.67024	0.676764	7.85144	2.68359	0.0513	0.295272	-4.13446	2391813	-0.876173	9.92171	-6.20568	0.000324	0.000939	-0.0335419	-0.728599	10.5832	-7.17332	4.76e-05	0.000145	1.75514	-0.67203	9.81065	-7.56464	5.01e-05	0.000175	1.84001	0	0	1	0	0	1	0	0	1
49724	65220	NADK	NM_023018	1	1	1672537	1699768	1674202	1686704	-0.264675	10.055	-3.01862	0.00962	0.0369	-3.77867	0.427976	7.64509	1.24034	0.279	0.568732	-5.87388	2391687	-0.356265	9.73772	-3.65911	0.00706	0.0131	-3.38074	-0.07463	10.528	-0.841342	0.422	0.472	-7.42421	-0.402348	10.3126	-4.90279	0.00103	0.00225	-1.44014	0	1	0	0	0	1	0	0	1
55532	2782	GNB1	NM_002074	1	1	1706589	1812354	1708629	1746751	0.42019	9.82189	3.65282	0.0028	0.0128	-2.54654	-0.115388	11.03	-0.448843	0.675	0.850131	-6.5502	2391840	0.10632	12.6366	0.879974	0.406	0.464	-7.3127	0.138644	12.0352	1.55848	0.153	0.192	-6.60907	-0.0794172	12.1583	-1.22614	0.253	0.306	-6.99497	0	1	0	0	1	0	0	1	0
89140	163688	CALML6	NM_138705	1	0	1836125	1838592	1836579	1838491	-0.0223661	5.59647	-0.252322	0.805	0.904	-7.46398	-0.269561	5.94745	-0.75202	0.491	0.733867	-6.3475	2316218	0.0460847	7.20862	0.18643	0.857	0.881	-7.70962	0.15711	10.4329	1.02393	0.332	0.382	-7.25215	-0.627893	8.06408	-4.24965	0.0025	0.00485	-2.39184	0	1	0	0	0	1	0	1	0
18680	339456	TMEM52	NM_178545	1	1	1838889	1840566	1839180	1840563	0.515071	6.18567	4.96184	0.000239	0.00155	-0.0344177	-0.347808	6.05352	-0.930732	0.402	0.66617	-6.19144	2391929	-0.435023	7.45614	-2.59854	0.0332	0.0513	-5.00453	0.495251	7.58243	2.28897	0.0473	0.0673	-5.50838	-0.191797	7.1941	-1.1205	0.294	0.348	-7.11388	0	1	0	0	1	0	0	1	0
83682	339457	LOC339457	NM_001003808	1	1	1843256	1849227	1843585	1847182	-0.155627	7.50146	-1.60957	0.131	0.301	-6.22961	-1000	-1000	-1000	-1000	-1000	-1000	2391929	-0.435023	7.45614	-2.59854	0.0332	0.0513	-5.00453	0.495251	7.58243	2.28897	0.0473	0.0673	-5.50838	-0.191797	7.1941	-1.1205	0.294	0.348	-7.11388	0	1	0	0	1	0	0	1	0
55489	2563	GABRD	NM_000815	1	0	1940702	1952049	1940722	1951580	0.0832336	6.84338	1.37736	0.191	0.392	-6.54772	-1.22318	4.29612	-2.85552	0.0427	0.275085	-3.93326	4054481	-0.136297	5.58717	-0.521506	-1000	-1000	-1000	0.000458	5.84381	0.00292294	-1000	-1000	-1000	0.276914	5.78503	1.23277	-1000	-1000	-1000	0	1	0	0	1	0	0	1	0
55681	5590	PRKCZ	NM_002744	1	0	1971768	2106691	1971929	2106307	-0.553075	7.99481	-6.52545	1.68e-05	0.000159	2.71849	1.20816	12.3424	2.60361	0.056	0.306267	-4.22944	2316245	-0.288495	9.75492	-2.21197	0.0598	0.086	-5.59833	-0.270545	10.1291	-1.796	0.105	0.138	-6.27197	-0.547652	9.79201	-7.47996	5.45e-05	0.000186	1.74908	0	1	0	0	0	1	0	1	0
55681	5590	PRKCZ	NM_001033581	1	0	1994945	2106691	2065637	2106307	-0.553075	7.99481	-6.52545	1.68e-05	0.000159	2.71849	1.20816	12.3424	2.60361	0.056	0.306267	-4.22944	2316245	-0.288495	9.75492	-2.21197	0.0598	0.086	-5.59833	-0.270545	10.1291	-1.796	0.105	0.138	-6.27197	-0.547652	9.79201	-7.47996	5.45e-05	0.000186	1.74908	0	1	0	0	0	1	0	1	0
55681	5590	PRKCZ	NM_001033582	1	0	2026014	2106691	2065637	2106307	-0.553075	7.99481	-6.52545	1.68e-05	0.000159	2.71849	1.20816	12.3424	2.60361	0.056	0.306267	-4.22944	2316245	-0.288495	9.75492	-2.21197	0.0598	0.086	-5.59833	-0.270545	10.1291	-1.796	0.105	0.138	-6.27197	-0.547652	9.79201	-7.47996	5.45e-05	0.000186	1.74908	0	1	0	0	0	1	0	1	0
18793	199990	C1orf86	NM_182533	1	1	2105776	2116073	2108456	2116047	-0.260513	8.19986	-3.421	0.00439	0.0189	-2.99908	-1000	-1000	-1000	-1000	-1000	-1000	2392095	-0.083689	7.70443	-0.625384	0.55	0.601	-7.51376	-0.128772	7.83627	-1.11572	0.293	0.342	-7.15552	-0.296933	7.89091	-2.53076	0.0339	0.0503	-5.10995	0	1	0	0	1	0	0	1	0
31124	6497	SKI	NM_003036	1	0	2149993	2229315	2150065	2228063	0.124494	5.86136	0.851309	0.41	0.634	-7.1199	0.436066	6.89656	1.43808	0.219	0.517217	-5.64904	2316379	-0.826772	9.66541	-5.48509	0.000708	0.0018	-0.889167	-0.382111	11.0198	-4.22849	0.00212	0.00402	-2.31761	-0.600556	9.36651	-6.99545	8.92e-05	0.00028	1.21339	0	0	1	0	0	1	0	0	1
11757	79906	MORN1	NM_024848	1	1	2242555	2312852	2242681	2312831	-0.0776297	5.76352	-1.20964	0.247	0.465	-6.75417	-0.460214	6.59286	-1.57379	0.186	0.480865	-5.4883	2392267	0.0445787	6.32234	0.136397	-1000	-1000	-1000	0.299292	6.79982	1.29731	-1000	-1000	-1000	0.407826	6.01143	1.08709	-1000	-1000	-1000	0	1	0	0	1	0	0	1	0
5468	11079	RER1	NM_007033	1	0	2313073	2326733	2317089	2324422	-0.358499	7.99291	-4.8672	0.000284	0.00179	-0.211042	0.654572	10.9622	2.80454	0.0451	0.281506	-3.99247	2392421	-0.149866	8.32625	-0.84895	0.422	0.479	-7.34027	-0.336769	10.7554	-3.0134	0.0143	0.0227	-4.31029	-0.485498	10.7856	-4.38589	0.00207	0.00412	-2.18848	0	0	1	0	0	1	0	1	0
5671	5192	PEX10	NM_002617	1	1	2326102	2333869	2327064	2333800	0.550344	7.62429	4.679	0.000401	0.0024	-0.565198	-0.155078	7.97068	-0.595152	0.582	0.792499	-6.46319	2392421	-0.149866	8.32625	-0.84895	0.422	0.479	-7.34027	-0.136335	8.6482	-1.07375	0.31	0.36	-7.2005	0.0403987	8.17141	0.31664	0.759	0.796	-7.71167	0	1	0	0	1	0	0	1	0
5671	5192	PEX10	NM_153818	1	1	2326102	2333869	2327064	2333800	0.550344	7.62429	4.679	0.000401	0.0024	-0.565198	-0.155078	7.97068	-0.595152	0.582	0.792499	-6.46319	2392421	-0.149866	8.32625	-0.84895	0.422	0.479	-7.34027	-0.136335	8.6482	-1.07375	0.31	0.36	-7.2005	0.0403987	8.17141	0.31664	0.759	0.796	-7.71167	0	1	0	0	1	0	0	1	0
85172	9651	PLCH2	NM_014638	1	0	2397613	2426823	2397887	2426511	-0.0339524	6.21792	-0.286388	0.779	0.89	-7.4542	0.783357	3.34959	2.04542	0.106	0.383287	-4.9103	2316605	-0.32714	9.95983	-1.42175	0.195	0.244	-6.71724	-0.335554	11.0066	-1.86501	0.0944	0.125	-6.16962	-0.539848	9.6009	-2.3321	0.0465	0.0669	-5.4262	0	1	0	0	1	0	0	1	0
41235	55229	PANK4	NM_018216	1	1	2429834	2447894	2430145	2447885	0.0848444	7.76672	0.930415	0.369	0.595	-7.04864	0.721556	6.78563	2.41827	0.0688	0.32919	-4.45255	2392528	0.077703	8.38138	0.592103	0.571	0.62	-7.53559	-0.324596	9.1113	-2.86712	0.0182	0.0283	-4.55499	-0.50096	9.46328	-6.10488	0.000236	0.000629	0.155252	0	0	1	0	0	1	0	1	0
7755	388585	HES5	NM_001010926	1	1	2450045	2451543	2450767	2451462	0.146516	5.09381	1.4056	0.183	0.381	-6.51095	-1000	-1000	-1000	-1000	-1000	-1000	-1000	-1000	-1000	-1000	-1000	-1000	-1000	-1000	-1000	-1000	-1000	-1000	-1000	-1000	-1000	-1000	-1000	-1000	-1000	0	1	0	0	1	0	0	1	0
2833	8764	TNFRSF14	NM_003820	1	1	2479152	2486612	2479705	2486313	-1.53665	8.05987	-11.1769	3.69e-08	1.13e-06	9.08931	-0.826214	3.82304	-2.76892	0.0468	0.284663	-4.03408	2392584	-2.26856	9.01849	-16.4766	3.37e-07	8.65e-06	7.43774	-2.07198	10.3765	-10.677	1.78e-06	1.08e-05	5.30267	-2.48449	9.93481	-13.6286	5.07e-07	7.23e-06	6.81589	0	0	1	0	0	1	0	0	1
11976	127281	C1orf93	NM_152371	1	0	2508108	2512761	2508184	2510725	0.703315	7.8759	5.05671	0.000202	0.00133	0.141592	-0.997306	7.18885	-3.40593	0.0245	0.226514	-3.32027	-1000	-1000	-1000	-1000	-1000	-1000	-1000	-1000	-1000	-1000	-1000	-1000	-1000	-1000	-1000	-1000	-1000	-1000	-1000	0	1	0	0	1	0	0	1	0
22778	79258	MMEL1	NM_033467	1	1	2511940	2554288	2512288	2550755	-0.0928111	6.71192	-0.886971	0.391	0.616	-7.08847	-0.95479	5.01342	-2.85525	0.0427	0.275122	-3.93357	2392666	-0.0383387	7.05789	-0.325648	0.754	0.789	-7.66971	-0.241984	7.13784	-1.66955	0.129	0.165	-6.4546	-0.707634	7.19987	-3.71293	0.00544	0.00969	-3.21575	0	1	0	0	0	1	0	1	0
23647	140625	ACTRT2	NM_080431	1	0	2927905	2929324	2928110	2929243	-0.028874	6.26332	-0.246139	0.809	0.906	-7.46562	0.279667	4.10582	1.05004	0.349	0.623473	-6.07521	2316905	-0.0374303	5.65398	-0.110947	-1000	-1000	-1000	0.075669	5.95249	0.335697	-1000	-1000	-1000	-0.490342	6.06326	-1.3773	-1000	-1000	-1000	0	1	0	0	1	0	0	1	0
11139	63976	PRDM16	NM_022114	1	0	2975603	3345042	2975683	3340234	0.113772	5.56963	1.11427	0.285	0.51	-6.86198	-0.298074	2.75441	-1.28631	0.264	0.556031	-5.82283	2316953	0.446121	6.61704	1.84494	-1000	-1000	-1000	0.321512	6.51148	1.4001	-1000	-1000	-1000	-0.015857	6.79275	-0.0545699	-1000	-1000	-1000	0	1	0	0	1	0	0	1	0
11139	63976	PRDM16	NM_199454	1	0	2975603	3345042	2975683	3340234	0.113772	5.56963	1.11427	0.285	0.51	-6.86198	-0.298074	2.75441	-1.28631	0.264	0.556031	-5.82283	2316953	0.446121	6.61704	1.84494	-1000	-1000	-1000	0.321512	6.51148	1.4001	-1000	-1000	-1000	-0.015857	6.79275	-0.0545699	-1000	-1000	-1000	0	1	0	0	1	0	0	1	0
82484	27237	ARHGEF16	NM_014448	1	0	3369981	3387534	3375859	3387010	-0.0798714	7.36464	-1.11624	0.284	0.509	-6.85982	0.280129	10.0888	0.88273	0.424	0.683325	-6.23564	2317246	0.0169927	8.64604	0.0458818	0.965	0.971	-7.72803	-0.225611	11.0496	-1.15628	0.277	0.326	-7.11081	-1.00171	8.96276	-5.1708	0.00073	0.00166	-1.06695	0	1	0	0	0	1	0	1	0
45412	1953	MEGF6	NM_001409	1	1	3394369	3517918	3396951	3517691	-0.0823192	5.04578	-1.15413	0.269	0.491	-6.81779	2.16255	8.40499	2.63722	0.054	0.30158	-4.18943	-1000	-1000	-1000	-1000	-1000	-1000	-1000	-1000	-1000	-1000	-1000	-1000	-1000	-1000	-1000	-1000	-1000	-1000	-1000	0	1	0	0	1	0	0	1	0
12192	127262	FAM79A	NM_182752	1	0	3531415	3536551	3531496	3535026	-0.692976	8.65142	-6.36987	2.16e-05	0.000196	2.45936	0.557588	8.62969	1.74453	0.151	0.443069	-5.28125	2317434	-0.253854	9.04894	-2.17073	0.0637	0.0909	-5.66072	-0.652299	9.30005	-6.06608	0.000173	0.000436	0.361092	-0.835577	8.84506	-8.93032	1.43e-05	6.69e-05	3.20553	0	0	1	0	0	1	0	1	0
9857	49856	WDR8	NM_017818	1	1	3537199	3556496	3537398	3556422	0.318939	7.62116	3.26655	0.00593	0.0244	-3.29968	0.54744	8.82563	1.38188	0.235	0.531938	-5.71424	2393538	0.292169	8.44118	2.0372	0.078	0.109	-5.86073	-0.191607	9.07384	-2.14272	0.0602	0.0838	-5.7418	-0.143908	9.5578	-1.73893	0.118	0.155	-6.32517	0	1	0	0	1	0	0	1	0
3960	7161	TP73	NM_005427	1	0	3558988	3639715	3588789	3639502	-0.163247	6.82929	-1.81912	0.0914	0.231	-5.9144	2.06483	2.86697	2.93602	0.0392	0.26647	-3.84055	2317317	-0.318276	6.63842	-1.08391	-1000	-1000	-1000	-0.19505	6.84868	-1.17245	-1000	-1000	-1000	0.470485	7.21804	0.812504	0.439	0.495	-7.41242	0	1	0	0	1	0	0	1	0
-1	57212	KIAA0495	NM_207306	1	1	3643573	3653049	3649605	3652626	-0.360982	8.40553	-4.88801	0.000273	0.00173	-0.172118	-0.146905	6.59821	-0.506357	0.638	0.827832	-6.51856	2393654	-0.488254	9.96779	-2.88937	0.0215	0.0349	-4.55366	-0.265127	11.8884	-1.57064	0.15	0.189	-6.59245	-0.225611	9.94312	-2.43875	0.0393	0.0573	-5.25698	0	1	0	0	1	0	0	0	1
17596	148870	CCDC27	NM_152492	1	0	3658821	3678068	3658905	3677946	0.0493212	6.39387	0.504642	0.622	0.794	-7.36285	-0.60589	3.8095	-0.728139	0.504	0.743418	-6.36649	2317472	-0.487421	8.81604	-2.90878	0.0208	0.0341	-4.52361	-0.516822	10.2112	-3.04641	0.0136	0.0216	-4.25504	-0.315764	8.43134	-2.08819	0.0686	0.0951	-5.80638	0	0	1	0	1	0	0	0	1
10795	57470	LRRC47	NM_020710	1	1	3686643	3702927	3687511	3702899	0.60209	10.2306	6.57033	1.57e-05	0.000149	2.79263	-0.366291	7.04172	-1.61824	0.176	0.470805	-5.43482	2393711	0.641944	9.78412	6.10202	0.000361	0.00103	-0.152417	0.471174	9.23443	3.49009	0.00664	0.0113	-3.51541	0.219635	10.0822	2.35697	0.0447	0.0646	-5.38686	1	0	0	0	1	0	1	0	0
44919	9731	KIAA0562	NM_014704	1	1	3721203	3763656	3721825	3758830	0.310091	8.0138	2.70173	0.0178	0.0621	-4.37976	0.30041	5.66396	1.01024	0.366	0.637543	-6.11493	2393740	0.168497	10.0919	1.26491	0.243	0.295	-6.9093	-0.150243	9.9584	-1.84483	0.0975	0.129	-6.19973	0.289875	9.27847	4.67128	0.0014	0.00293	-1.77069	0	1	0	1	0	0	0	1	0
3241	1677	DFFB	NM_001004285	1	0	3763704	3791851	3764027	3772186	-1000	-1000	-1000	-1000	-1000	-1000	-0.373982	6.63806	-1.31568	0.254	0.548972	-5.7898	-1000	-1000	-1000	-1000	-1000	-1000	-1000	-1000	-1000	-1000	-1000	-1000	-1000	-1000	-1000	-1000	-1000	-1000	-1000	0	1	0	0	1	0	0	1	0
3241	1677	DFFB	NM_001004286	1	0	3763704	3791851	3764027	3772319	-1000	-1000	-1000	-1000	-1000	-1000	-0.373982	6.63806	-1.31568	0.254	0.548972	-5.7898	-1000	-1000	-1000	-1000	-1000	-1000	-1000	-1000	-1000	-1000	-1000	-1000	-1000	-1000	-1000	-1000	-1000	-1000	-1000	0	1	0	0	1	0	0	1	0
3241	1677	DFFB	NM_004402	1	0	3763704	3791851	3764027	3790164	1.09158	6.66366	8.75638	6.66e-07	1.1e-05	6.08277	-0.373982	6.63806	-1.31568	0.254	0.548972	-5.7898	2317512	0.938315	8.0064	8.95814	2.73e-05	0.000133	2.68387	0.716735	8.31385	5.85147	0.000227	0.000552	0.0723462	1.12412	7.60941	8.61414	1.88e-05	8.23e-05	2.90534	1	0	0	1	0	0	1	0	0
18433	339448	C1orf174	NM_207356	1	1	3795562	3806708	3796383	3806609	0.731586	9.00252	6.20454	2.82e-05	0.000246	2.18031	0.185046	11.2698	0.63503	0.558	0.778688	-6.43586	2393816	1.08472	10.1743	9.35169	2.02e-05	0.000109	3.01399	0.800274	9.64795	6.46896	0.000106	0.000287	0.886475	0.62393	9.98902	6.7907	0.000111	0.000333	0.978808	1	0	0	1	0	0	1	0	0
-1	-1	AJAP1	NM_001042478	1	0	4614964	4737713	4615345	4734418	-1000	-1000	-1000	-1000	-1000	-1000	-1000	-1000	-1000	-1000	-1000	-1000	2317686	-0.707499	4.33491	-1.25998	-1000	-1000	-1000	0.241031	4.10919	0.720921	-1000	-1000	-1000	-0.402855	4.66751	-1.07037	-1000	-1000	-1000	0	1	0	0	1	0	0	1	0
10312	55966	AJAP1	NM_018836	1	0	4614964	4743709	4615345	4734418	-0.127636	5.11785	-1.53196	0.149	0.33	-6.33982	0.445063	8.51554	0.848297	0.441	0.696332	-6.26635	2317686	-0.707499	4.33491	-1.25998	-1000	-1000	-1000	0.241031	4.10919	0.720921	-1000	-1000	-1000	-0.402855	4.66751	-1.07037	-1000	-1000	-1000	0	1	0	0	1	0	0	1	0
9024	261734	NPHP4	NM_015102	1	1	5845456	5975117	5845911	5968935	0.884267	6.53128	8.9891	4.92e-07	8.63e-06	6.3984	0.302983	5.53985	0.459481	0.668	0.845565	-6.54461	2394361	0.900462	8.8478	6.5724	0.000223	0.000691	0.376221	1.82504	8.82676	9.91487	3.35e-06	1.74e-05	4.62378	0.735695	8.19194	7.75418	4.17e-05	0.000151	2.04071	1	0	0	1	0	0	1	0	0
56492	8514	KCNAB2	NM_003636	1	0	6008966	6083109	6023215	6081220	1.69218	9.03631	12.7311	7.44e-09	3.43e-07	10.741	-1.77988	3.72547	-3.83232	0.0164	0.199057	-2.88047	2318086	2.0072	9.90215	14.4771	8.72e-07	1.48e-05	6.42664	1.22192	9.73225	6.56439	9.51e-05	0.00026	1.00782	1.26456	9.61387	11.9174	1.49e-06	1.41e-05	5.6581	1	0	0	1	0	0	1	0	0
56492	8514	KCNAB2	NM_172130	1	0	6008966	6083109	6023215	6081220	1.69218	9.03631	12.7311	7.44e-09	3.43e-07	10.741	-1.77988	3.72547	-3.83232	0.0164	0.199057	-2.88047	2318086	2.0072	9.90215	14.4771	8.72e-07	1.48e-05	6.42664	1.22192	9.73225	6.56439	9.51e-05	0.00026	1.00782	1.26456	9.61387	11.9174	1.49e-06	1.41e-05	5.6581	1	0	0	1	0	0	1	0	0
56712	26038	CHD5	NM_015557	1	1	6084439	6162769	6088926	6162669	0.0533103	6.05944	0.549442	0.592	0.775	-7.33807	1.37647	2.52124	2.53166	0.0606	0.315137	-4.31559	2394478	-0.251677	5.09411	-0.877557	-1000	-1000	-1000	0.28683	4.82426	1.35754	-1000	-1000	-1000	0.545241	4.92961	1.89251	-1000	-1000	-1000	0	1	0	0	1	0	0	1	0
37378	6146	RPL22	NM_000983	1	1	6167667	6182265	6169318	6182219	0.77495	11.0093	6.62162	1.44e-05	0.000139	2.87702	-0.509488	11.6004	-2.20849	0.0875	0.356803	-4.70909	2394558	0.30155	12.8866	2.28303	0.0537	0.0783	-5.49026	1.31102	11.7225	10.1453	2.75e-06	1.5e-05	4.83378	0.170709	13.3257	2.51649	0.0347	0.0514	-5.13281	1	0	0	0	1	0	0	1	0
19234	388591	RNF207	NM_207396	1	0	6188121	6190952	6189182	6190568	-0.326872	8.76196	-2.09784	0.0555	0.157	-5.46062	0.179704	2.68954	0.772178	0.481	0.727076	-6.33111	2318170	0.373903	8.73766	3.04402	0.0171	0.0286	-4.31457	-0.232153	9.48349	-1.79854	0.105	0.138	-6.26824	0.35838	7.56848	1.76953	0.113	0.148	-6.28131	0	1	0	0	1	0	1	0	0
-1	148646	C1orf188	NM_173795	1	0	6191506	6203445	6192114	6194686	-1000	-1000	-1000	-1000	-1000	-1000	-1000	-1000	-1000	-1000	-1000	-1000	-1000	-1000	-1000	-1000	-1000	-1000	-1000	-1000	-1000	-1000	-1000	-1000	-1000	-1000	-1000	-1000	-1000	-1000	-1000	0	1	0	0	1	0	0	1	0
5735	23463	ICMT	NM_012405	1	1	6203841	6218630	6207726	6218557	0.608771	7.79241	8.66956	7.47e-07	1.21e-05	5.96343	0.233104	8.91709	0.811411	0.46	0.711197	-6.29828	2394588	1.10701	10.3852	8.32379	4.55e-05	0.000196	2.12443	0.937381	9.42061	9.72274	3.95e-06	1.97e-05	4.44547	0.853597	9.71138	9.9351	6.26e-06	3.72e-05	4.10291	1	0	0	1	0	0	1	0	0
7358	390992	HES3	NM_001024598	1	0	6226231	6228680	6227012	6228153	-1000	-1000	-1000	-1000	-1000	-1000	-1000	-1000	-1000	-1000	-1000	-1000	-1000	-1000	-1000	-1000	-1000	-1000	-1000	-1000	-1000	-1000	-1000	-1000	-1000	-1000	-1000	-1000	-1000	-1000	-1000	0	1	0	0	1	0	0	1	0
18662	387509	GPR153	NM_207370	1	1	6231442	6243621	6231984	6237551	-0.174939	8.75513	-2.05355	0.0601	0.168	-5.53506	0.38839	14.2592	1.2813	0.265	0.557249	-5.82844	2394608	0.587857	5.28479	1.46668	-1000	-1000	-1000	-0.116614	5.94645	-0.304644	-1000	-1000	-1000	0.952581	5.32022	1.52019	-1000	-1000	-1000	0	1	0	0	1	0	0	1	0
15780	11332	ACOT7	NM_181866	1	1	6246919	6341590	6247243	6341491	1.89041	9.14463	12.5227	9.13e-09	3.92e-07	10.5304	-0.156001	10.5766	-0.296723	0.781	0.906971	-6.61679	2394626	2.00267	8.21224	14.2105	9.99e-07	1.59e-05	6.28095	2.33686	8.55576	10.3202	2.38e-06	1.34e-05	4.99031	1.87219	9.01472	17.0026	8.39e-08	2.51e-06	8.72568	1	0	0	1	0	0	1	0	0
15780	11332	ACOT7	NM_181865	1	1	6246919	6343350	6247243	6343298	1.89041	9.14463	12.5227	9.13e-09	3.92e-07	10.5304	-0.156001	10.5766	-0.296723	0.781	0.906971	-6.61679	2394626	2.00267	8.21224	14.2105	9.99e-07	1.59e-05	6.28095	2.33686	8.55576	10.3202	2.38e-06	1.34e-05	4.99031	1.87219	9.01472	17.0026	8.39e-08	2.51e-06	8.72568	1	0	0	1	0	0	1	0	0
15780	11332	ACOT7	NM_181864	1	1	6246919	6368469	6247243	6368312	1.89041	9.14463	12.5227	9.13e-09	3.92e-07	10.5304	-0.156001	10.5766	-0.296723	0.781	0.906971	-6.61679	2394626	2.00267	8.21224	14.2105	9.99e-07	1.59e-05	6.28095	2.33686	8.55576	10.3202	2.38e-06	1.34e-05	4.99031	1.87219	9.01472	17.0026	8.39e-08	2.51e-06	8.72568	1	0	0	1	0	0	1	0	0
15780	11332	ACOT7	NM_007274	1	1	6246919	6376412	6247243	6376045	1.89041	9.14463	12.5227	9.13e-09	3.92e-07	10.5304	-0.156001	10.5766	-0.296723	0.781	0.906971	-6.61679	2394626	2.00267	8.21224	14.2105	9.99e-07	1.59e-05	6.28095	2.33686	8.55576	10.3202	2.38e-06	1.34e-05	4.99031	1.87219	9.01472	17.0026	8.39e-08	2.51e-06	8.72568	1	0	0	1	0	0	1	0	0
22455	54626	HES2	NM_019089	1	1	6397882	6402565	6401519	6402466	-0.0685783	6.8063	-0.983885	0.343	0.57	-6.99733	3.70345	6.78543	16.5489	4.88e-05	0.0936517	2.49804	2394680	-0.261174	4.68272	-0.734346	-1000	-1000	-1000	-0.0180522	4.82138	-0.125008	-1000	-1000	-1000	-0.575413	4.82013	-1.19134	-1000	-1000	-1000	0	1	0	0	1	0	0	1	0
23164	83715	ESPN	NM_031475	1	0	6407434	6443589	6407602	6442792	0.119321	4.88598	1.30763	0.213	0.422	-6.63606	-0.943383	5.63248	-2.25918	0.0825	0.349655	-4.6468	2318257	-0.4284	4.97754	-0.883834	-1000	-1000	-1000	-0.464047	6.95395	-2.49071	0.0339	0.0498	-5.17989	-0.714083	5.70366	-3.11152	-1000	-1000	-1000	0	0	1	0	1	0	0	1	0
13202	8718	TNFRSF25	NM_003790	1	1	6443807	6448841	6444080	6448753	-0.195421	6.6738	-2.49911	0.0262	0.0857	-4.75404	0.11979	10.0643	0.211042	0.843	0.936192	-6.6428	2394699	-0.095506	7.50905	-0.525098	0.615	0.662	-7.5762	-0.291454	7.98128	-1.12241	0.29	0.34	-7.14822	-0.128699	7.25915	-0.712337	0.496	0.55	-7.49217	0	1	0	0	1	0	0	1	0
13202	8718	TNFRSF25	NM_148965	1	1	6443807	6448841	6444080	6448753	-0.195421	6.6738	-2.49911	0.0262	0.0857	-4.75404	0.11979	10.0643	0.211042	0.843	0.936192	-6.6428	2394699	-0.095506	7.50905	-0.525098	0.615	0.662	-7.5762	-0.291454	7.98128	-1.12241	0.29	0.34	-7.14822	-0.128699	7.25915	-0.712337	0.496	0.55	-7.49217	0	1	0	0	1	0	0	1	0
13202	8718	TNFRSF25	NM_148966	1	1	6443807	6448841	6444080	6448753	-0.195421	6.6738	-2.49911	0.0262	0.0857	-4.75404	0.11979	10.0643	0.211042	0.843	0.936192	-6.6428	2394699	-0.095506	7.50905	-0.525098	0.615	0.662	-7.5762	-0.291454	7.98128	-1.12241	0.29	0.34	-7.14822	-0.128699	7.25915	-0.712337	0.496	0.55	-7.49217	0	1	0	0	1	0	0	1	0
13202	8718	TNFRSF25	NM_148967	1	1	6443807	6448841	6444080	6448753	-0.195421	6.6738	-2.49911	0.0262	0.0857	-4.75404	0.11979	10.0643	0.211042	0.843	0.936192	-6.6428	2394699	-0.095506	7.50905	-0.525098	0.615	0.662	-7.5762	-0.291454	7.98128	-1.12241	0.29	0.34	-7.14822	-0.128699	7.25915	-0.712337	0.496	0.55	-7.49217	0	1	0	0	1	0	0	1	0
13202	8718	TNFRSF25	NM_148970	1	1	6443807	6448841	6444080	6448753	-0.195421	6.6738	-2.49911	0.0262	0.0857	-4.75404	-1000	-1000	-1000	-1000	-1000	-1000	2394699	-0.095506	7.50905	-0.525098	0.615	0.662	-7.5762	-0.291454	7.98128	-1.12241	0.29	0.34	-7.14822	-0.128699	7.25915	-0.712337	0.496	0.55	-7.49217	0	1	0	0	1	0	0	1	0
13202	8718	TNFRSF25	NM_001039664	1	1	6446757	6448841	6447017	6448753	-0.195421	6.6738	-2.49911	0.0262	0.0857	-4.75404	-1000	-1000	-1000	-1000	-1000	-1000	2394699	-0.095506	7.50905	-0.525098	0.615	0.662	-7.5762	-0.291454	7.98128	-1.12241	0.29	0.34	-7.14822	-0.128699	7.25915	-0.712337	0.496	0.55	-7.49217	0	1	0	0	1	0	0	1	0
-1	-1	PLEKHG5	NM_001042665	1	1	6448738	6468600	6450209	6460217	-1000	-1000	-1000	-1000	-1000	-1000	0.128719	8.31096	0.206755	0.846	0.937237	-6.64387	2394699	-0.095506	7.50905	-0.525098	0.615	0.662	-7.5762	-0.291454	7.98128	-1.12241	0.29	0.34	-7.14822	-0.128699	7.25915	-0.712337	0.496	0.55	-7.49217	0	1	0	0	1	0	0	1	0
-1	-1	PLEKHG5	NM_001042664	1	1	6448738	6473226	6450209	6460217	-1000	-1000	-1000	-1000	-1000	-1000	0.128719	8.31096	0.206755	0.846	0.937237	-6.64387	2394699	-0.095506	7.50905	-0.525098	0.615	0.662	-7.5762	-0.291454	7.98128	-1.12241	0.29	0.34	-7.14822	-0.128699	7.25915	-0.712337	0.496	0.55	-7.49217	0	1	0	0	1	0	0	1	0
10768	57449	PLEKHG5	NM_020631	1	1	6448738	6474346	6450209	6460217	0.157666	7.18337	2.19105	0.0467	0.137	-5.30144	-1000	-1000	-1000	-1000	-1000	-1000	2394699	-0.095506	7.50905	-0.525098	0.615	0.662	-7.5762	-0.291454	7.98128	-1.12241	0.29	0.34	-7.14822	-0.128699	7.25915	-0.712337	0.496	0.55	-7.49217	0	1	0	0	1	0	0	1	0
-1	-1	PLEKHG5	NM_001042663	1	1	6448738	6480070	6450209	6479969	-1000	-1000	-1000	-1000	-1000	-1000	0.128719	8.31096	0.206755	0.846	0.937237	-6.64387	2394699	-0.095506	7.50905	-0.525098	0.615	0.662	-7.5762	-0.291454	7.98128	-1.12241	0.29	0.34	-7.14822	-0.128699	7.25915	-0.712337	0.496	0.55	-7.49217	0	1	0	0	1	0	0	1	0
10768	57449	PLEKHG5	NM_198681	1	1	6448738	6502655	6450209	6502157	0.157666	7.18337	2.19105	0.0467	0.137	-5.30144	0.128719	8.31096	0.206755	0.846	0.937237	-6.64387	2394699	-0.095506	7.50905	-0.525098	0.615	0.662	-7.5762	-0.291454	7.98128	-1.12241	0.29	0.34	-7.14822	-0.128699	7.25915	-0.712337	0.496	0.55	-7.49217	0	1	0	0	1	0	0	1	0
32589	79707	NOL9	NM_024654	1	1	6507796	6537167	6508500	6537148	0.926007	9.36135	9.76532	1.86e-07	3.97e-06	7.40806	-0.21828	7.98787	-0.87236	0.429	0.687437	-6.24498	2394784	1.08271	10.642	8.82895	3.02e-05	0.000144	2.57275	0.461695	10.0007	4.7382	0.00101	0.00207	-1.52802	0.831255	9.51556	8.06774	3.1e-05	0.00012	2.36449	1	0	0	1	0	0	1	0	0
12888	80835	TAS1R1	NM_177539	1	0	6538020	6562402	6538020	6561481	-0.0432706	5.36602	-0.542579	0.596	0.778	-7.342	-0.434572	3.58336	-1.82858	0.137	0.424986	-5.17808	2318338	-0.037138	6.82216	-0.167558	-1000	-1000	-1000	-0.280977	7.1734	-2.44442	0.0366	0.0534	-5.25581	-0.0911292	6.63448	-0.471368	-1000	-1000	-1000	0	1	0	0	1	0	0	1	0
12888	80835	TAS1R1	NM_177541	1	0	6538020	6562402	6538020	6562084	-0.0432706	5.36602	-0.542579	0.596	0.778	-7.342	-0.434572	3.58336	-1.82858	0.137	0.424986	-5.17808	2318338	-0.037138	6.82216	-0.167558	-1000	-1000	-1000	-0.280977	7.1734	-2.44442	0.0366	0.0534	-5.25581	-0.0911292	6.63448	-0.471368	-1000	-1000	-1000	0	1	0	0	1	0	0	1	0
12888	80835	TAS1R1	NM_138697	1	0	6538020	6562402	6538020	6562230	-0.0432706	5.36602	-0.542579	0.596	0.778	-7.342	-0.434572	3.58336	-1.82858	0.137	0.424986	-5.17808	2318338	-0.037138	6.82216	-0.167558	-1000	-1000	-1000	-0.280977	7.1734	-2.44442	0.0366	0.0534	-5.25581	-0.0911292	6.63448	-0.471368	-1000	-1000	-1000	0	1	0	0	1	0	0	1	0
12888	80835	TAS1R1	NM_177540	1	0	6538020	6562402	6538020	6562230	-0.0432706	5.36602	-0.542579	0.596	0.778	-7.342	-0.434572	3.58336	-1.82858	0.137	0.424986	-5.17808	2318338	-0.037138	6.82216	-0.167558	-1000	-1000	-1000	-0.280977	7.1734	-2.44442	0.0366	0.0534	-5.25581	-0.0911292	6.63448	-0.471368	-1000	-1000	-1000	0	1	0	0	1	0	0	1	0
3905	3104	ZBTB48	NM_005341	1	0	6562697	6571925	6563256	6571858	-0.184856	7.54217	-2.19167	0.0467	0.137	-5.30036	-0.397027	6.48166	-1.41693	0.225	0.522611	-5.67369	2318364	-0.362394	8.835	-1.66913	0.136	0.178	-6.38944	-0.329141	11.3002	-2.12415	0.0621	0.0861	-5.77108	-0.877232	8.91673	-4.09084	0.00314	0.00592	-2.63196	0	1	0	0	0	1	0	1	0
8902	9903	KLHL21	NM_014851	1	1	6573371	6585515	6576011	6585463	1.49965	7.84477	14.6817	1.25e-09	9.48e-08	12.5694	-0.187274	5.74703	-0.689405	0.526	0.758519	-6.39627	2394817	1.12625	8.32017	8.53513	3.83e-05	0.000172	2.31472	1.34374	8.20952	7.57677	3.08e-05	0.000101	2.22581	1.14026	8.27905	7.38992	5.96e-05	0.000201	1.65154	1	0	0	1	0	0	1	0	0
17822	148479	PHF13	NM_153812	1	0	6596331	6606642	6596713	6604283	0.611424	8.30376	6.57302	1.56e-05	0.000149	2.79707	0.187745	11.0604	0.704308	0.518	0.753117	-6.38496	2318398	0.54254	9.55725	4.39121	0.00265	0.00557	-2.32574	0.333543	9.55655	2.82592	0.0195	0.03	-4.62383	0.674334	9.26623	7.6223	4.74e-05	0.000167	1.90147	1	0	0	1	0	0	1	0	0
-1	90326	THAP3	NM_138350	1	0	6607838	6618231	6607865	6616734	0.149297	7.50349	1.7855	0.0969	0.241	-5.96661	-1000	-1000	-1000	-1000	-1000	-1000	2394841	1.5847	10.4156	14.6048	8.17e-07	1.42e-05	6.49549	1.29601	10.3239	9.2381	6.06e-06	2.74e-05	3.98198	1.3185	9.95053	14.4643	3.13e-07	5.47e-06	7.33047	1	0	0	1	0	0	1	0	0
14558	55735	DNAJC11	NM_018198	1	1	6616817	6684459	6618321	6684446	1.07032	8.58199	11.4614	2.72e-08	8.98e-07	9.40629	-0.401008	6.14754	-1.79789	0.142	0.432314	-5.21582	2394841	1.5847	10.4156	14.6048	8.17e-07	1.42e-05	6.49549	1.29601	10.3239	9.2381	6.06e-06	2.74e-05	3.98198	1.3185	9.95053	14.4643	3.13e-07	5.47e-06	7.33047	1	0	0	1	0	0	1	0	0
18942	23261	CAMTA1	NM_015215	1	0	6767970	7752349	6768177	7749137	0.704331	9.31673	7.36101	4.67e-06	5.44e-05	4.05392	-0.673742	7.76664	-2.63187	0.0543	0.302369	-4.19579	2318455	-0.0652683	5.41664	-0.284553	-1000	-1000	-1000	-0.24378	5.34206	-1.45279	-1000	-1000	-1000	-0.373124	5.38425	-1.33706	-1000	-1000	-1000	0	1	0	0	1	0	0	1	0
3511	9341	VAMP3	NM_004781	1	0	7753915	7764077	7754030	7762291	0.31619	6.44654	2.18005	0.0477	0.14	-5.3204	0.482977	8.46475	1.77547	0.146	0.436928	-5.24334	2318637	-0.23772	9.78826	-1.66176	0.137	0.179	-6.39957	0.0956977	8.52245	0.689236	0.508	0.556	-7.54528	-0.327839	9.98144	-4.96825	0.000947	0.00209	-1.34805	0	1	0	0	0	1	0	1	0
7886	8863	PER3	NM_016831	1	0	7767349	7827822	7767524	7825401	0.146004	3.61078	2.27491	0.04	0.121	-5.15546	-0.313638	4.37964	-0.801358	0.465	0.715083	-6.30681	2318656	0.815041	6.47708	3.78136	-1000	-1000	-1000	0.650022	5.7091	4.16709	-1000	-1000	-1000	0.581374	5.78151	1.96628	-1000	-1000	-1000	0	1	0	0	1	0	0	1	0
4939	10911	UTS2	NM_006786	1	1	7830261	7835681	7830412	7835649	-0.0478864	4.25942	-0.592816	0.563	0.755	-7.31216	-1.68512	4.49586	-5.52979	0.0043	0.14111	-1.41814	2395123	-0.245741	4.59903	-0.840711	-1000	-1000	-1000	0.499753	4.03078	1.64728	-1000	-1000	-1000	-0.250619	4.13	-0.719975	-1000	-1000	-1000	0	1	0	0	1	0	0	1	0
4939	10911	UTS2	NM_021995	1	1	7830261	7836158	7830412	7836077	-0.0478864	4.25942	-0.592816	0.563	0.755	-7.31216	-1.68512	4.49586	-5.52979	0.0043	0.14111	-1.41814	2395123	-0.245741	4.59903	-0.840711	-1000	-1000	-1000	0.499753	4.03078	1.64728	-1000	-1000	-1000	-0.250619	4.13	-0.719975	-1000	-1000	-1000	0	1	0	0	1	0	0	1	0
1199	3604	TNFRSF9	NM_001561	1	1	7902494	7923473	7903481	7922640	-0.625062	7.20398	-1.80184	0.0942	0.236	-5.94131	-0.817885	4.10577	-1.55115	0.191	0.486802	-5.5154	2395146	-0.974967	5.31468	-3.20284	-1000	-1000	-1000	-1.00436	6.40848	-4.06379	-1000	-1000	-1000	-1.39964	5.99977	-4.46938	-1000	-1000	-1000	0	1	0	0	1	0	0	1	0
38295	11315	PARK7	NM_007262	1	0	7944379	7967922	7945432	7967700	0.42318	12.4893	4.44831	0.000614	0.00346	-1.00416	-0.278689	14.2561	-1.22967	0.282	0.571749	-5.88561	2318736	0.915732	10.9813	5.723	0.000543	0.00144	-0.59901	1.37067	11.5047	11.1819	1.2e-06	8.12e-06	5.72913	0.308873	12.2079	4.01221	0.00351	0.00653	-2.75203	1	0	0	1	0	0	1	0	0
10344	54206	ERRFI1	NM_018948	1	1	7994381	8008942	7995856	7998265	0.237108	5.34427	0.722184	0.483	0.694	-7.2239	2.95101	13.2183	11.1663	0.000254	0.10871	1.31524	2395177	-0.359662	4.72165	-1.288	-1000	-1000	-1000	-0.285714	4.50421	-1.53288	-1000	-1000	-1000	-0.262265	4.61216	-0.901105	-1000	-1000	-1000	0	1	0	0	1	0	0	1	0
-1	-1	RERE	NM_001042682	1	1	8335052	8406333	8337733	8346779	-1000	-1000	-1000	-1000	-1000	-1000	0.264534	7.17362	0.880118	0.426	0.684334	-6.238	2395245	-0.788408	9.91012	-5.92177	0.000438	0.0012	-0.362437	-0.73105	11.7721	-8.66315	1.03e-05	4.15e-05	3.40503	-0.768317	9.75794	-7.54249	5.13e-05	0.000177	1.8163	0	0	1	0	0	1	0	0	1
8101	473	RERE	NM_001042681	1	1	8335052	8800285	8337733	8638942	-1.02386	10.1607	-7.7059	2.82e-06	3.58e-05	4.57807	0.264534	7.17362	0.880118	0.426	0.684334	-6.238	2395245	-0.788408	9.91012	-5.92177	0.000438	0.0012	-0.362437	-0.73105	11.7721	-8.66315	1.03e-05	4.15e-05	3.40503	-0.768317	9.75794	-7.54249	5.13e-05	0.000177	1.8163	0	0	1	0	0	1	0	0	1
-1	-1	RERE	NM_012102	1	1	8335052	8800285	8337733	8638942	-1000	-1000	-1000	-1000	-1000	-1000	0.264534	7.17362	0.880118	0.426	0.684334	-6.238	2395245	-0.788408	9.91012	-5.92177	0.000438	0.0012	-0.362437	-0.73105	11.7721	-8.66315	1.03e-05	4.15e-05	3.40503	-0.768317	9.75794	-7.54249	5.13e-05	0.000177	1.8163	0	0	1	0	0	1	0	0	1
68183	2023	ENO1	NM_001428	1	1	8843649	8861366	8844005	8857553	1.21218	12.6087	9.17448	3.88e-07	7.13e-06	6.64545	-0.585806	13.1638	-2.5345	0.0604	0.315102	-4.31218	2395490	1.64829	13.2578	13.2727	1.64e-06	2.09e-05	5.74524	0.585492	13.5152	5.15032	0.000569	0.00124	-0.915372	0.235843	13.4696	2.95032	0.0175	0.0275	-4.43351	1	0	0	1	0	0	1	0	0
20324	765	CA6	NM_001215	1	0	8928508	8957732	8928532	8957349	-0.0789409	6.52605	-0.864272	0.403	0.628	-7.10861	-0.733437	2.36054	-1.18763	0.297	0.582643	-5.93135	2319135	-0.492489	3.60653	-0.961137	-1000	-1000	-1000	-0.479602	2.61701	-0.885323	-1000	-1000	-1000	0.535234	3.96772	1.51769	-1000	-1000	-1000	0	1	0	0	1	0	0	1	0
72470	155184	SLC2A7	NM_207420	1	1	8985945	9008990	8985945	9008990	-1000	-1000	-1000	-1000	-1000	-1000	-1000	-1000	-1000	-1000	-1000	-1000	2395545	0.00962833	6.84765	0.0393034	-1000	-1000	-1000	-0.034715	7.1693	-0.254879	0.804	0.832	-7.76584	-0.0819108	6.1939	-0.33011	-1000	-1000	-1000	0	1	0	0	1	0	0	1	0
74459	6518	SLC2A5	NM_003039	1	1	9019593	9052256	9020231	9052181	-0.686273	8.28144	-2.39754	0.0318	0.1	-4.93775	-0.140893	3.35708	-0.332719	0.755	0.893712	-6.60334	2395564	-0.451189	9.53367	-4.3328	0.00286	0.00595	-2.40726	-0.750073	9.71368	-10.2564	2.51e-06	1.4e-05	4.93351	-0.844447	9.87309	-12.166	1.26e-06	1.28e-05	5.8359	0	0	1	0	0	1	0	0	1
18573	80045	GPR157	NM_024980	1	1	9087062	9111815	9087064	9111672	-0.489167	7.26339	-3.0546	0.00897	0.0347	-3.70952	-1000	-1000	-1000	-1000	-1000	-1000	2395626	-0.48322	7.11019	-1.21771	0.26	0.313	-6.96427	-0.545714	7.3487	-2.06887	0.0679	0.0933	-5.85775	-0.0126772	7.33084	-0.0434964	0.966	0.972	-7.76628	0	1	0	0	1	0	0	1	0
48275	9563	H6PD	NM_004285	1	0	9217449	9253978	9227580	9247514	-0.78713	7.71181	-8.00998	1.83e-06	2.52e-05	5.02756	0.447072	5.65645	1.3446	0.246	0.541807	-5.75697	2319225	-0.87323	6.9967	-3.99678	0.00445	0.00876	-2.88535	-2.06667	8.01502	-16.3792	4.23e-08	9.46e-07	9.29557	-1.26652	7.20317	-6.66909	0.000126	0.000371	0.837082	0	0	1	0	0	1	0	0	1
11832	80176	SPSB1	NM_025106	1	0	9275570	9352174	9338537	9350220	0.0432037	5.69245	0.52661	0.607	0.785	-7.35095	3.26856	9.57131	6.98757	0.00172	0.121101	-0.462918	2319252	0.016175	6.90371	0.0630561	-1000	-1000	-1000	0.183958	6.6828	1.13258	-1000	-1000	-1000	-0.126683	6.73355	-0.54784	-1000	-1000	-1000	0	1	0	0	1	0	0	1	0
57076	84275	SLC25A33	NM_032315	1	0	9522114	9565416	9522337	9565145	1.95881	8.64382	14.4192	1.57e-09	1.12e-07	12.3373	-0.526521	10.7178	-2.04785	0.105	0.382827	-4.9073	2319340	1.82319	8.83537	14.4251	8.95e-07	1.5e-05	6.39845	1.39155	8.05791	10.4889	2.07e-06	1.21e-05	5.13923	1.23182	9.45916	8.93799	1.42e-05	6.67e-05	3.2127	1	0	0	1	0	0	1	0	0
35319	199953	RP13-15M17.2	NM_001010866	1	0	9571566	9587592	9571575	9584935	0.817924	8.67379	9.53145	2.48e-07	5e-06	7.11062	-1000	-1000	-1000	-1000	-1000	-1000	-1000	-1000	-1000	-1000	-1000	-1000	-1000	-1000	-1000	-1000	-1000	-1000	-1000	-1000	-1000	-1000	-1000	-1000	-1000	0	1	0	0	1	0	0	1	0
3686	5293	PIK3CD	NM_005026	1	0	9634389	9711555	9693100	9709690	-1.02803	11.2294	-9.26949	3.44e-07	6.51e-06	6.77062	-0.936034	8.76464	-1.24413	0.277	0.567561	-5.8697	2319423	-1.11014	10.3485	-8.6278	3.55e-05	0.000163	2.39691	-1.17714	11.1959	-14.8951	9.83e-08	1.52e-06	8.40532	-1.01036	10.1964	-12.7108	8.89e-07	1.03e-05	6.21367	0	0	1	0	0	1	0	0	1
-1	-1	LOC644997	NM_001045478	1	1	9635255	9637230	9636423	9637080	-1000	-1000	-1000	-1000	-1000	-1000	-1000	-1000	-1000	-1000	-1000	-1000	-1000	-1000	-1000	-1000	-1000	-1000	-1000	-1000	-1000	-1000	-1000	-1000	-1000	-1000	-1000	-1000	-1000	-1000	-1000	0	1	0	0	1	0	0	1	0
8814	22883	CLSTN1	NM_001009566	1	1	9711666	9807136	9713152	9806377	0.157443	8.99332	1.5343	0.148	0.329	-6.33655	0.073096	10.4537	0.219287	0.837	0.933031	-6.64067	2395890	0.185012	9.59831	1.4333	0.192	0.24	-6.70257	0.278155	10.6515	2.2887	0.0474	0.0673	-5.5088	0.281854	9.45103	3.58048	0.00663	0.0116	-3.42407	0	1	0	1	0	0	0	1	0
8814	22883	CLSTN1	NM_014944	1	1	9711666	9807136	9713152	9806377	0.157443	8.99332	1.5343	0.148	0.329	-6.33655	0.073096	10.4537	0.219287	0.837	0.933031	-6.64067	2395890	0.185012	9.59831	1.4333	0.192	0.24	-6.70257	0.278155	10.6515	2.2887	0.0474	0.0673	-5.5088	0.281854	9.45103	3.58048	0.00663	0.0116	-3.42407	0	1	0	1	0	0	0	1	0
-1	645010	FLJ16126	NM_001039777	1	1	9808933	9810915	9810495	9810878	-1000	-1000	-1000	-1000	-1000	-1000	-1000	-1000	-1000	-1000	-1000	-1000	-1000	-1000	-1000	-1000	-1000	-1000	-1000	-1000	-1000	-1000	-1000	-1000	-1000	-1000	-1000	-1000	-1000	-1000	-1000	0	1	0	0	1	0	0	1	0
10641	56998	CTNNBIP1	NM_001012329	1	1	9830920	9892902	9833362	9854708	-0.155715	7.64576	-1.73694	0.105	0.257	-6.04094	0.696486	11.039	1.94878	0.119	0.400102	-5.02978	2395965	-0.415074	8.31025	-1.6466	0.14	0.183	-6.42036	-0.339349	8.29904	-1.22701	0.25	0.298	-7.03003	-0.0355135	7.83468	-0.146599	0.887	0.907	-7.75535	0	1	0	0	1	0	0	1	0
10641	56998	CTNNBIP1	NM_020248	1	1	9830920	9892902	9833362	9854708	-0.155715	7.64576	-1.73694	0.105	0.257	-6.04094	0.696486	11.039	1.94878	0.119	0.400102	-5.02978	2395965	-0.415074	8.31025	-1.6466	0.14	0.183	-6.42036	-0.339349	8.29904	-1.22701	0.25	0.298	-7.03003	-0.0355135	7.83468	-0.146599	0.887	0.907	-7.75535	0	1	0	0	1	0	0	1	0
12301	84328	LZIC	NM_032368	1	1	9912364	9925412	9913043	9919263	0.590345	7.52656	7.03798	7.58e-06	8.14e-05	3.54879	0.274387	10.3686	1.16099	0.306	0.590345	-5.95993	2396009	0.392753	10.145	3.23248	0.013	0.0223	-4.02501	0.177532	8.77533	1.85053	0.0967	0.128	-6.19124	-0.0334822	10.4626	-0.371169	0.72	0.761	-7.69102	0	1	0	0	1	0	1	0	0
39074	64802	NMNAT1	NM_022787	1	0	9926072	9968141	9954718	9965345	-0.613681	5.87619	-5.48627	9.46e-05	0.000695	0.924802	1.92368	5.33152	3.19382	0.0301	0.243522	-3.55059	2319518	-0.574856	7.80211	-4.1364	0.00369	0.00746	-2.68483	-0.76905	6.86339	-5.43345	0.000389	0.000887	-0.508257	-0.522497	7.65741	-5.83062	0.000325	0.000822	-0.191199	0	0	1	0	0	1	0	0	1
32521	116362	RBP7	NM_052960	1	0	9979860	9998663	9979903	9998476	0.136433	6.00456	1.7731	0.099	0.245	-5.98571	-0.879982	8.15388	-1.10299	0.328	0.607673	-6.02098	2319550	-0.549367	7.06302	-1.9776	0.0854	0.118	-5.94884	-0.00243125	6.71398	-0.0145692	-1000	-1000	-1000	-0.111549	6.37769	-0.371886	-1000	-1000	-1000	0	1	0	0	1	0	0	1	0
108168	10277	UBE4B	NM_006048	1	0	10015629	10163880	10016315	10162600	0.293447	7.35573	2.6096	0.0212	0.072	-4.55111	-0.273342	9.16967	-1.15683	0.308	0.591355	-5.96436	2319560	0.17182	10.4087	1.45283	0.186	0.234	-6.67762	-0.199755	9.69978	-2.57523	0.0295	0.0438	-5.04061	0.337327	9.50685	5.22098	0.000685	0.00157	-0.998197	0	0	1	1	0	0	0	1	0
99835	23095	KIF1B	NM_183416	1	0	10193417	10289401	10214973	10287291	0.337383	7.52332	2.07938	0.0574	0.162	-5.49175	-0.16042	7.69531	-0.697342	0.522	0.755475	-6.39027	2319661	-0.479864	9.09573	-4.01207	0.00436	0.0086	-2.86327	-0.455332	8.63482	-5.11919	0.000593	0.00129	-0.960821	-0.101972	8.14748	-1.39133	0.2	0.248	-6.79456	0	0	1	0	1	0	0	0	1
99835	23095	KIF1B	NM_015074	1	0	10193417	10364240	10214973	10359231	0.337383	7.52332	2.07938	0.0574	0.162	-5.49175	0.411096	9.80596	1.64289	0.171	0.465052	-5.40502	2319661	-0.479864	9.09573	-4.01207	0.00436	0.0086	-2.86327	-0.455332	8.63482	-5.11919	0.000593	0.00129	-0.960821	-0.101972	8.14748	-1.39133	0.2	0.248	-6.79456	0	0	1	0	1	0	0	0	1
68268	5226	PGD	NM_002631	1	0	10381671	10402786	10381761	10402392	0.819416	10.3309	8.50195	9.34e-07	1.45e-05	5.73055	-0.509733	11.5522	-1.59806	0.181	0.475474	-5.45915	2319802	1.18993	11.971	9.18484	2.29e-05	0.000118	2.87554	1.3754	11.4422	8.7945	9.13e-06	3.75e-05	3.53955	0.557079	11.7912	7.59955	4.85e-05	0.00017	1.87726	1	0	0	1	0	0	1	0	0
66004	378708	APITD1	NM_199294	1	0	10412745	10425450	10413161	10425048	0.745116	7.4895	4.94281	0.000248	0.00159	-0.0698531	-1000	-1000	-1000	-1000	-1000	-1000	2319832	1.16886	7.4658	9.55695	1.74e-05	9.72e-05	3.18134	1.57956	6.28121	8.08855	1.82e-05	6.52e-05	2.79666	0.718173	8.42214	5.54822	0.000456	0.0011	-0.558597	1	0	0	1	0	0	1	0	0
66004	378708	APITD1	NM_198544	1	0	10412745	10434794	10413161	10434238	0.745116	7.4895	4.94281	0.000248	0.00159	-0.0698531	0.3274	6.92026	1.05445	0.348	0.622316	-6.07075	2319832	1.16886	7.4658	9.55695	1.74e-05	9.72e-05	3.18134	1.57956	6.28121	8.08855	1.82e-05	6.52e-05	2.79666	0.718173	8.42214	5.54822	0.000456	0.0011	-0.558597	1	0	0	1	0	0	1	0	0
66004	378708	APITD1	NM_199295	1	0	10413386	10425450	10416551	10425048	0.745116	7.4895	4.94281	0.000248	0.00159	-0.0698531	-0.510562	8.07297	-2.27138	0.0813	0.347823	-4.63183	2319832	1.16886	7.4658	9.55695	1.74e-05	9.72e-05	3.18134	1.57956	6.28121	8.08855	1.82e-05	6.52e-05	2.79666	0.718173	8.42214	5.54822	0.000456	0.0011	-0.558597	1	0	0	1	0	0	1	0	0
997	1325	CORT	NM_001302	1	0	10432557	10434543	10432717	10434238	0.0996203	7.17612	1.00346	0.333	0.561	-6.97793	0.3274	6.92026	1.05445	0.348	0.622316	-6.07075	2319832	1.16886	7.4658	9.55695	1.74e-05	9.72e-05	3.18134	1.57956	6.28121	8.08855	1.82e-05	6.52e-05	2.79666	0.718173	8.42214	5.54822	0.000456	0.0011	-0.558597	1	0	0	1	0	0	1	0	0
3240	1676	DFFA	NM_004401	1	1	10443191	10455199	10444133	10455101	0.707605	8.01375	7.59749	3.3e-06	4.06e-05	4.41498	-0.549527	9.77326	-2.39069	0.071	0.332105	-4.48607	2396121	0.967216	10.0931	5.66444	0.000579	0.00152	-0.669714	-0.507648	8.97135	-3.12258	0.012	0.0193	-4.12762	0.68867	10.0727	8.27464	2.56e-05	0.000104	2.57269	0	0	1	1	0	0	1	0	0
3240	1676	DFFA	NM_213566	1	1	10443191	10455199	10445677	10455101	0.707605	8.01375	7.59749	3.3e-06	4.06e-05	4.41498	-0.549527	9.77326	-2.39069	0.071	0.332105	-4.48607	2396121	0.967216	10.0931	5.66444	0.000579	0.00152	-0.669714	-0.507648	8.97135	-3.12258	0.012	0.0193	-4.12762	0.68867	10.0727	8.27464	2.56e-05	0.000104	2.57269	0	0	1	1	0	0	1	0	0
37936	5195	PEX14	NM_004565	1	0	10457589	10613399	10457610	10612630	0.101364	6.70402	1.28625	0.22	0.431	-6.66245	0.308311	11.2593	1.3572	0.242	0.538494	-5.74259	2319881	1.10224	5.8396	3.27781	-1000	-1000	-1000	-0.507648	8.97135	-3.12258	0.012	0.0193	-4.12762	0.142377	7.58181	0.570127	0.584	0.634	-7.58922	0	0	1	0	1	0	0	1	0
-1	654487	SRG	NM_001039183	1	1	10619774	10621137	10619919	10620437	-1000	-1000	-1000	-1000	-1000	-1000	-1000	-1000	-1000	-1000	-1000	-1000	-1000	-1000	-1000	-1000	-1000	-1000	-1000	-1000	-1000	-1000	-1000	-1000	-1000	-1000	-1000	-1000	-1000	-1000	-1000	0	1	0	0	1	0	0	1	0
9824	54897	CASZ1	NM_017766	1	1	10629864	10676548	10630440	10647864	-0.505436	4.0239	-4.07804	0.00124	0.00634	-1.71798	-1.19625	6.46261	-2.50206	0.0627	0.318409	-4.35121	2396201	-0.586264	7.35339	-3.76508	0.0061	0.0115	-3.22376	-1.2671	7.51227	-12.8733	3.54e-07	3.51e-06	7.03931	-0.707508	7.22195	-5.50981	0.000478	0.00115	-0.609423	0	0	1	0	0	1	0	0	1
52134	148345	C1orf127	NM_173507	1	1	10929119	10946844	10930306	10946839	-0.121126	7.70015	-1.42631	0.177	0.372	-6.48364	0.679983	2.57137	2.45779	0.0658	0.324366	-4.40466	2396362	-0.18577	8.99994	-1.39038	0.204	0.254	-6.75674	-0.515006	9.07909	-3.62258	0.00538	0.0093	-3.29667	-0.734627	8.6028	-4.20774	0.00266	0.00512	-2.4549	0	0	1	0	0	1	0	1	0
7221	23435	TARDBP	NM_007375	1	0	10995265	11008134	10996371	11005297	0.977019	10.7417	8.8025	6.27e-07	1.05e-05	6.14581	0.262759	10.5427	1.02136	0.361	0.634011	-6.10393	2320048	0.808331	11.5554	6.12272	0.000354	0.00101	-0.128573	0.261987	11.4712	3.01225	0.0144	0.0227	-4.31221	0.401489	11.0392	5.31289	0.00061	0.00142	-0.873221	1	0	0	1	0	0	1	0	0
4819	10747	MASP2	NM_006610	1	1	11009167	11029871	11009528	11029850	0.0948697	6.1495	1.41908	0.179	0.375	-6.4932	-1.78958	3.30491	-4.1952	0.012	0.179868	-2.53039	2396415	0.156737	5.33164	0.439847	-1000	-1000	-1000	0.0789055	6.15643	0.314788	-1000	-1000	-1000	-0.340996	5.7369	-1.29811	-1000	-1000	-1000	0	1	0	0	1	0	0	1	0
4819	10747	MASP2	NM_139208	1	1	11027442	11029871	11027583	11029850	0.0948697	6.1495	1.41908	0.179	0.375	-6.4932	-1.53683	7.89686	-6.58163	0.00218	0.123557	-0.705857	2396415	0.156737	5.33164	0.439847	-1000	-1000	-1000	0.0789055	6.15643	0.314788	-1000	-1000	-1000	-0.340996	5.7369	-1.29811	-1000	-1000	-1000	0	1	0	0	1	0	0	1	0
40514	6723	SRM	NM_003132	1	1	11037235	11042677	11037508	11042586	2.83458	10.3102	23.7455	2.53e-12	2.31e-09	18.6961	-0.850023	10.2848	-3.70125	0.0185	0.208031	-3.01235	2396461	2.90999	10.9038	16.5726	3.22e-07	8.51e-06	7.483	3.05708	10.67	18.7419	1.27e-08	4.84e-07	10.5543	2.33772	10.9902	26.1214	2.42e-09	5.71e-07	12.3349	1	0	0	1	0	0	1	0	0
31105	5394	EXOSC10	NM_001001998	1	1	11049264	11082524	11049361	11082474	0.377411	8.5822	4.04909	0.00131	0.00664	-1.77417	0.017981	10.4574	0.0797766	0.94	0.97883	-6.66584	2396480	0.387813	11.4017	2.95416	0.0195	0.0321	-4.45338	0.230105	11.5641	2.81147	0.02	0.0307	-4.64794	0.284448	11.0378	3.6406	0.00606	0.0107	-3.32931	1	0	0	1	0	0	1	0	0
31105	5394	EXOSC10	NM_002685	1	1	11049264	11082524	11049361	11082474	0.377411	8.5822	4.04909	0.00131	0.00664	-1.77417	0.017981	10.4574	0.0797766	0.94	0.97883	-6.66584	2396480	0.387813	11.4017	2.95416	0.0195	0.0321	-4.45338	0.230105	11.5641	2.81147	0.02	0.0307	-4.64794	0.284448	11.0378	3.6406	0.00606	0.0107	-3.32931	1	0	0	1	0	0	1	0	0
3637	2475	FRAP1	NM_004958	1	1	11089179	11245150	11090128	11242052	0.336448	7.36058	3.90039	0.00174	0.00848	-2.06344	-0.0941123	9.79432	-0.368037	0.73	0.880819	-6.58874	2396537	0.279322	10.3	2.26824	0.0549	0.0798	-5.51281	0.0597925	10.2616	0.748851	0.473	0.523	-7.50036	0.181446	9.46212	2.95821	0.0172	0.0272	-4.42076	0	1	0	1	0	0	0	1	0
88622	10218	ANGPTL7	NM_021146	1	0	11171984	11178623	11172223	11177666	0.0150563	5.37811	0.224241	0.826	0.915	-7.47112	0.16507	2.48078	0.381579	0.721	0.875805	-6.58278	2320188	0.252244	5.59891	0.815984	-1000	-1000	-1000	-0.114209	6.29559	-0.389101	-1000	-1000	-1000	-0.05351	5.76423	-0.12251	-1000	-1000	-1000	0	1	0	0	1	0	0	1	0
8336	29914	UBIAD1	NM_013319	1	0	11255865	11268924	11256175	11268774	1.25501	7.46611	14.7943	1.13e-09	8.89e-08	12.6676	-0.081118	8.32079	-0.302702	0.776	0.904469	-6.61466	2320210	0.882035	10.3081	5.8876	0.000454	0.00124	-0.402731	0.664748	9.76651	5.30716	0.00046	0.00103	-0.688459	0.87524	9.66942	6.59417	0.000137	0.000398	0.748864	1	0	0	1	0	0	1	0	0
8132	26232	FBXO2	NM_012168	1	1	11631036	11637325	11631337	11636983	-0.120972	6.71665	-1.43872	0.173	0.368	-6.46712	0.33321	10.7025	0.398195	0.71	0.870348	-6.57518	2396750	-0.0110323	5.26775	-0.0339577	-1000	-1000	-1000	-0.812738	5.1732	-3.17023	-1000	-1000	-1000	-0.181357	5.29898	-0.441706	-1000	-1000	-1000	0	1	0	0	1	0	0	1	0
13232	93611	FBXO44	NM_183412	1	0	11637018	11645969	11638479	11643948	0.191253	7.12849	1.38939	0.187	0.387	-6.53212	-0.413186	8.44277	-0.938198	0.398	0.663196	-6.18443	2320347	0.122484	6.939	0.886694	0.403	0.46	-7.30662	-0.285149	7.50591	-2.46413	0.0355	0.0518	-5.22352	-0.121728	7.05916	-0.946971	0.37	0.426	-7.29149	0	1	0	0	1	0	0	1	0
13232	93611	FBXO44	NM_001014765	1	0	11637500	11645969	11638479	11643916	0.191253	7.12849	1.38939	0.187	0.387	-6.53212	-0.413186	8.44277	-0.938198	0.398	0.663196	-6.18443	2320347	0.122484	6.939	0.886694	0.403	0.46	-7.30662	-0.285149	7.50591	-2.46413	0.0355	0.0518	-5.22352	-0.121728	7.05916	-0.946971	0.37	0.426	-7.29149	0	1	0	0	1	0	0	1	0
13232	93611	FBXO44	NM_033182	1	0	11637500	11645969	11638479	11643916	0.191253	7.12849	1.38939	0.187	0.387	-6.53212	-0.413186	8.44277	-0.938198	0.398	0.663196	-6.18443	2320347	0.122484	6.939	0.886694	0.403	0.46	-7.30662	-0.285149	7.50591	-2.46413	0.0355	0.0518	-5.22352	-0.121728	7.05916	-0.946971	0.37	0.426	-7.29149	0	1	0	0	1	0	0	1	0
13232	93611	FBXO44	NM_183413	1	0	11637500	11645969	11638479	11643948	0.191253	7.12849	1.38939	0.187	0.387	-6.53212	-0.413186	8.44277	-0.938198	0.398	0.663196	-6.18443	2320347	0.122484	6.939	0.886694	0.403	0.46	-7.30662	-0.285149	7.50591	-2.46413	0.0355	0.0518	-5.22352	-0.121728	7.05916	-0.946971	0.37	0.426	-7.29149	0	1	0	0	1	0	0	1	0
9274	26270	FBXO6	NM_018438	1	0	11646767	11656993	11651302	11656494	0.0644923	3.7175	0.758595	0.461	0.676	-7.19616	1.24735	5.58373	4.61327	0.00848	0.163992	-2.15357	2320374	-1.09696	6.52209	-2.97387	0.0189	0.0313	-4.42291	-0.307038	6.7588	-1.009	-1000	-1000	-1000	-0.317216	7.41271	-1.95402	0.0847	0.115	-6.00999	0	1	0	0	1	0	0	0	1
4624	10459	MAD2L2	NM_006341	1	1	11657124	11663773	11657418	11663244	0.602577	8.68936	5.89032	4.75e-05	0.000386	1.63965	-1.10499	10.9106	-3.17011	0.0309	0.245764	-3.5768	2396781	0.836939	9.37766	7.61667	8.35e-05	0.000317	1.45718	0.652907	9.15418	7.6035	2.99e-05	9.89e-05	2.25633	0.669403	9.95354	6.56313	0.000141	0.00041	0.712113	1	0	0	1	0	0	1	0	0
19233	374946	C1orf187	NM_198545	1	0	11674367	11702922	11688902	11702339	0.06146	4.62531	0.987558	0.341	0.568	-6.99371	-0.526122	7.29603	-0.832973	0.449	0.702258	-6.27974	2320392	-0.288433	9.04754	-1.36739	0.211	0.261	-6.78536	-0.500949	10.3505	-3.18456	0.0108	0.0176	-4.02399	-0.242701	9.05594	-0.977331	0.356	0.412	-7.26211	0	0	1	0	1	0	0	1	0
7621	57085	AGTRAP	NM_001040197	1	0	11718728	11733413	11718852	11731236	0.499511	7.87478	5.06246	0.0002	0.00132	0.15222	-1000	-1000	-1000	-1000	-1000	-1000	2320411	0.103666	8.76082	0.87121	0.41	0.468	-7.32057	-0.15776	9.48957	-1.67249	0.128	0.164	-6.45043	-0.0294142	10.1294	-0.228953	0.824	0.853	-7.73815	0	1	0	0	1	0	0	1	0
7621	57085	AGTRAP	NM_001040195	1	0	11718728	11733413	11718852	11732747	0.499511	7.87478	5.06246	0.0002	0.00132	0.15222	0.375606	5.73975	1.08348	0.336	0.614114	-6.04113	2320411	0.103666	8.76082	0.87121	0.41	0.468	-7.32057	-0.15776	9.48957	-1.67249	0.128	0.164	-6.45043	-0.0294142	10.1294	-0.228953	0.824	0.853	-7.73815	0	1	0	0	1	0	0	1	0
7621	57085	AGTRAP	NM_001040196	1	0	11718728	11733413	11718852	11732747	0.499511	7.87478	5.06246	0.0002	0.00132	0.15222	0.375606	5.73975	1.08348	0.336	0.614114	-6.04113	2320411	0.103666	8.76082	0.87121	0.41	0.468	-7.32057	-0.15776	9.48957	-1.67249	0.128	0.164	-6.45043	-0.0294142	10.1294	-0.228953	0.824	0.853	-7.73815	0	1	0	0	1	0	0	1	0
7621	57085	AGTRAP	NM_001040194	1	0	11718728	11733413	11718852	11732835	0.499511	7.87478	5.06246	0.0002	0.00132	0.15222	0.375606	5.73975	1.08348	0.336	0.614114	-6.04113	2320411	0.103666	8.76082	0.87121	0.41	0.468	-7.32057	-0.15776	9.48957	-1.67249	0.128	0.164	-6.45043	-0.0294142	10.1294	-0.228953	0.824	0.853	-7.73815	0	1	0	0	1	0	0	1	0
7621	57085	AGTRAP	NM_020350	1	0	11718728	11733413	11718852	11732835	0.499511	7.87478	5.06246	0.0002	0.00132	0.15222	0.375606	5.73975	1.08348	0.336	0.614114	-6.04113	2320411	0.103666	8.76082	0.87121	0.41	0.468	-7.32057	-0.15776	9.48957	-1.67249	0.128	0.164	-6.45043	-0.0294142	10.1294	-0.228953	0.824	0.853	-7.73815	0	1	0	0	1	0	0	1	0
4349	4524	MTHFR	NM_005957	1	1	11768373	11788701	11773323	11785759	-0.969361	7.75119	-12.6205	8.29e-09	3.68e-07	10.6296	0.788306	4.89167	1.2856	0.264	0.556139	-5.82362	2396817	-1.17181	8.99774	-10.569	8.5e-06	5.98e-05	3.96187	-1.30268	9.60611	-9.8625	3.5e-06	1.8e-05	4.57548	-0.95572	8.3993	-6.38328	0.000172	0.000482	0.496765	0	0	1	0	0	1	0	0	1
985	1185	CLCN6	NM_001286	1	0	11788880	11825771	11788906	11822866	-0.152286	7.53731	-1.76714	0.1	0.247	-5.99486	0.341934	8.71763	0.998364	0.371	0.641674	-6.12661	2320472	-0.11859	9.74477	-1.02987	0.335	0.392	-7.16846	0.167588	10.5933	1.88122	0.092	0.122	-6.14532	0.11414	8.70979	1.71637	0.123	0.16	-6.35728	0	1	0	0	1	0	0	1	0
985	1185	CLCN6	NM_021735	1	0	11788880	11825771	11788906	11822866	-0.152286	7.53731	-1.76714	0.1	0.247	-5.99486	0.341934	8.71763	0.998364	0.371	0.641674	-6.12661	2320472	-0.11859	9.74477	-1.02987	0.335	0.392	-7.16846	0.167588	10.5933	1.88122	0.092	0.122	-6.14532	0.11414	8.70979	1.71637	0.123	0.16	-6.35728	0	1	0	0	1	0	0	1	0
985	1185	CLCN6	NM_021736	1	0	11788880	11825771	11788906	11822866	-0.152286	7.53731	-1.76714	0.1	0.247	-5.99486	0.341934	8.71763	0.998364	0.371	0.641674	-6.12661	2320472	-0.11859	9.74477	-1.02987	0.335	0.392	-7.16846	0.167588	10.5933	1.88122	0.092	0.122	-6.14532	0.11414	8.70979	1.71637	0.123	0.16	-6.35728	0	1	0	0	1	0	0	1	0
985	1185	CLCN6	NM_021737	1	0	11788880	11825771	11788906	11822866	-0.152286	7.53731	-1.76714	0.1	0.247	-5.99486	0.341934	8.71763	0.998364	0.371	0.641674	-6.12661	2320472	-0.11859	9.74477	-1.02987	0.335	0.392	-7.16846	0.167588	10.5933	1.88122	0.092	0.122	-6.14532	0.11414	8.70979	1.71637	0.123	0.16	-6.35728	0	1	0	0	1	0	0	1	0
4498	4878	NPPA	NM_006172	1	1	11828362	11830421	11828652	11830327	-0.066897	7.14563	-0.985856	0.342	0.569	-6.99539	-3.4969	4.28165	-14.4107	8.75e-05	0.0936517	2.12301	2396848	-0.77986	5.39101	-2.6847	-1000	-1000	-1000	0.163408	5.38778	0.542668	-1000	-1000	-1000	0.281103	4.96765	0.466985	-1000	-1000	-1000	0	1	0	0	1	0	0	1	0
81698	4879	NPPB	NM_002521	1	1	11840108	11841578	11840298	11841476	-0.00726373	6.48896	-0.1012	0.921	0.964	-7.49252	-0.597918	12.9547	-0.469836	0.661	0.842062	-6.53905	2396858	0.097995	4.47797	0.264865	-1000	-1000	-1000	-0.11575	4.73146	-0.558902	-1000	-1000	-1000	0.46696	4.40896	1.23001	-1000	-1000	-1000	0	1	0	0	1	0	0	1	0
12668	90231	KIAA2013	NM_138346	1	1	11902711	11909066	11902958	11908880	0.201627	8.90041	3.15586	0.00736	0.0294	-3.5142	-0.0426683	10.3303	-0.172215	0.871	0.949479	-6.65175	2396872	0.246443	9.81491	1.55649	0.16	0.205	-6.54206	0.114661	10.4402	0.848004	0.418	0.468	-7.41843	-0.15186	10.1125	-1.52132	0.165	0.208	-6.62583	0	1	0	0	1	0	0	1	0
256	5351	PLOD1	NM_000302	1	0	11917332	11958179	11917423	11957451	0.388859	8.14362	2.34178	0.0353	0.109	-5.03734	0.430269	9.04725	1.54755	0.192	0.487838	-5.5197	2320581	0.574417	9.10676	4.24471	0.0032	0.00658	-2.53109	0.321723	10.4813	2.88891	0.0176	0.0274	-4.51857	0.181623	9.48156	1.55205	0.157	0.2	-6.58467	1	0	0	0	1	0	1	0	0
8915	9927	MFN2	NM_014874	1	0	11962955	11996151	11971812	11994208	0.494084	9.42472	5.54858	8.49e-05	0.000635	1.03646	0.044938	11.8861	0.198331	0.852	0.940173	-6.64593	2320619	0.735051	10.2542	6.04701	0.000383	0.00108	-0.216064	0.489675	9.83303	5.61396	0.000307	0.00072	-0.254557	0.530826	9.4717	6.77563	0.000112	0.000337	0.961343	1	0	0	1	0	0	1	0	0
15879	60672	IIP45	NM_001025374	1	0	12002098	12014692	12004370	12012043	-1000	-1000	-1000	-1000	-1000	-1000	-1000	-1000	-1000	-1000	-1000	-1000	-1000	-1000	-1000	-1000	-1000	-1000	-1000	-1000	-1000	-1000	-1000	-1000	-1000	-1000	-1000	-1000	-1000	-1000	-1000	0	1	0	0	1	0	0	1	0
15879	60672	IIP45	NM_021933	1	0	12002098	12014692	12004370	12014451	-0.126868	9.64312	-1.16289	0.265	0.486	-6.80792	-0.441675	8.63497	-1.74577	0.151	0.442891	-5.27974	2320657	0.249219	9.04489	1.93938	0.0905	0.124	-6.00491	0.458056	10.3174	3.86369	0.00369	0.00663	-2.90247	0.0492573	9.36561	0.653428	0.531	0.584	-7.53474	1	0	0	0	1	0	0	1	0
949	943	TNFRSF8	NM_001243	1	0	12046020	12126848	12046242	12125174	0.125041	9.28513	0.412513	0.687	0.835	-7.40741	-4.30533	8.52855	-10.6813	0.000305	0.10871	1.16076	2320683	1.42308	8.84441	12.997	1.92e-06	2.27e-05	5.58048	0.961182	9.43376	5.61118	0.000308	0.000722	-0.258433	1.01122	8.70792	6.6481	0.000129	0.000378	0.812433	1	0	0	1	0	0	1	0	0
949	943	TNFRSF8	NM_152942	1	0	12108544	12126848	12120926	12125174	0.125041	9.28513	0.412513	0.687	0.835	-7.40741	-4.30533	8.52855	-10.6813	0.000305	0.10871	1.16076	2320683	1.42308	8.84441	12.997	1.92e-06	2.27e-05	5.58048	0.961182	9.43376	5.61118	0.000308	0.000722	-0.258433	1.01122	8.70792	6.6481	0.000129	0.000378	0.812433	1	0	0	1	0	0	1	0	0
829	7133	TNFRSF1B	NM_001066	1	0	12149646	12191862	12149735	12189663	-0.248575	8.66488	-2.93895	0.0112	0.0421	-3.93122	3.86271	4.21267	2.89997	0.0407	0.270493	-3.88194	2320727	-0.390198	9.88417	-3.41197	0.01	0.0178	-3.75178	-0.617481	11.0456	-4.18934	0.00225	0.00424	-2.37963	-0.611031	9.72922	-7.07246	8.23e-05	0.000262	1.30034	0	0	1	0	0	1	0	0	1
15583	55187	VPS13D	NM_015378	1	0	12212699	12494682	12216910	12491664	-0.297317	7.08635	-4.20282	0.000975	0.00517	-1.47634	0.42046	7.93908	1.10053	0.329	0.608425	-6.02353	2320762	-0.432005	10.26	-2.92316	0.0204	0.0334	-4.50135	-0.644216	9.81907	-8.83109	8.82e-06	3.65e-05	3.57673	-0.396363	8.70588	-4.679	0.00139	0.0029	-1.75956	0	0	1	0	0	1	0	0	1
15583	55187	VPS13D	NM_018156	1	0	12212699	12494682	12216910	12491664	-0.297317	7.08635	-4.20282	0.000975	0.00517	-1.47634	0.42046	7.93908	1.10053	0.329	0.608425	-6.02353	2320762	-0.432005	10.26	-2.92316	0.0204	0.0334	-4.50135	-0.644216	9.81907	-8.83109	8.82e-06	3.65e-05	3.57673	-0.396363	8.70588	-4.679	0.00139	0.0029	-1.75956	0	0	1	0	0	1	0	0	1
20994	9249	DHRS3	NM_004753	1	1	12550526	12600406	12550955	12599939	-0.16423	7.29676	-1.94275	0.0734	0.196	-5.71755	1.42633	10.1599	3.91478	0.0153	0.193676	-2.79899	2397025	-0.116465	7.22958	-1.00892	0.344	0.402	-7.18968	-0.135148	7.32069	-0.775453	0.458	0.507	-7.47925	-0.104105	7.0508	-0.759148	0.469	0.524	-7.45604	0	1	0	0	1	0	0	1	0
82530	343066	AADACL4	NM_001013630	1	0	12627152	12649682	12627152	12649332	-1000	-1000	-1000	-1000	-1000	-1000	-1000	-1000	-1000	-1000	-1000	-1000	-1000	-1000	-1000	-1000	-1000	-1000	-1000	-1000	-1000	-1000	-1000	-1000	-1000	-1000	-1000	-1000	-1000	-1000	-1000	0	1	0	0	1	0	0	1	0
17541	93190	C1orf158	NM_152290	1	0	12728749	12743687	12728965	12743470	0.0209764	6.31808	0.263668	0.796	0.899	-7.46086	-0.0443307	10.0986	-0.17093	0.872	0.949732	-6.65202	-1000	-1000	-1000	-1000	-1000	-1000	-1000	-1000	-1000	-1000	-1000	-1000	-1000	-1000	-1000	-1000	-1000	-1000	-1000	0	1	0	0	1	0	0	1	0
-1	65121	PRAMEF1	NM_023013	1	0	12774132	12778809	12775963	12778731	-0.0549871	6.07192	-0.473892	0.643	0.808	-7.37869	0.060846	4.62552	0.254825	0.811	0.920601	-6.63057	2321040	0.622441	4.53	1.8079	-1000	-1000	-1000	0.645695	3.58378	1.86967	-1000	-1000	-1000	-0.292782	4.57409	-1.21505	-1000	-1000	-1000	0	1	0	0	1	0	0	1	0
-1	343069	HNRPCL1	NM_001013631	1	1	12829849	12831164	12829849	12830728	0.303703	7.01003	3.54072	0.00348	0.0154	-2.76548	-0.55587	11.4912	-2.44147	0.0671	0.326251	-4.42442	-1000	-1000	-1000	-1000	-1000	-1000	-1000	-1000	-1000	-1000	-1000	-1000	-1000	-1000	-1000	-1000	-1000	-1000	-1000	0	1	0	0	1	0	0	1	0
88378	65122	PRAMEF2	NM_023014	1	0	12839527	12844350	12841451	12844220	-0.0549871	6.07192	-0.473892	0.643	0.808	-7.37869	0.158138	2.46415	0.633765	0.559	0.779239	-6.43675	2321040	0.622441	4.53	1.8079	-1000	-1000	-1000	0.645695	3.58378	1.86967	-1000	-1000	-1000	-0.292782	4.57409	-1.21505	-1000	-1000	-1000	0	1	0	0	1	0	0	1	0
-1	400735	PRAMEF4	NM_001009611	1	1	12861631	12868611	12861951	12865801	-1000	-1000	-1000	-1000	-1000	-1000	-1000	-1000	-1000	-1000	-1000	-1000	-1000	-1000	-1000	-1000	-1000	-1000	-1000	-1000	-1000	-1000	-1000	-1000	-1000	-1000	-1000	-1000	-1000	-1000	-1000	0	1	0	0	1	0	0	1	0
88617	343071	PRAMEF10	NM_001039361	1	1	12875313	12880674	12875333	12878264	-0.151213	6.1577	-1.44263	0.172	0.366	-6.4619	-0.903188	4.09671	-2.26659	0.0818	0.348491	-4.63771	-1000	-1000	-1000	-1000	-1000	-1000	-1000	-1000	-1000	-1000	-1000	-1000	-1000	-1000	-1000	-1000	-1000	-1000	-1000	0	1	0	0	1	0	0	1	0
-1	391002	PRAMEF8	NM_001012276	1	0	12899036	12903152	12900099	12902819	-1000	-1000	-1000	-1000	-1000	-1000	-1.4305	3.56769	-3.10277	0.033	0.251482	-3.65176	-1000	-1000	-1000	-1000	-1000	-1000	-1000	-1000	-1000	-1000	-1000	-1000	-1000	-1000	-1000	-1000	-1000	-1000	-1000	0	1	0	0	1	0	0	1	0
77553	441871	PRAMEF7	NM_001012277	1	0	12900099	12902818	12900099	12902818	-1000	-1000	-1000	-1000	-1000	-1000	-1000	-1000	-1000	-1000	-1000	-1000	-1000	-1000	-1000	-1000	-1000	-1000	-1000	-1000	-1000	-1000	-1000	-1000	-1000	-1000	-1000	-1000	-1000	-1000	-1000	0	1	0	0	1	0	0	1	0
-1	440561	PRAMEF6	NM_001010889	1	1	12921092	12924934	12921092	12924934	-1000	-1000	-1000	-1000	-1000	-1000	-1000	-1000	-1000	-1000	-1000	-1000	-1000	-1000	-1000	-1000	-1000	-1000	-1000	-1000	-1000	-1000	-1000	-1000	-1000	-1000	-1000	-1000	-1000	-1000	-1000	0	1	0	0	1	0	0	1	0
86357	343068	PRAMEF5	NM_001013407	1	1	13031100	13040337	13031424	13035266	-1000	-1000	-1000	-1000	-1000	-1000	-1000	-1000	-1000	-1000	-1000	-1000	-1000	-1000	-1000	-1000	-1000	-1000	-1000	-1000	-1000	-1000	-1000	-1000	-1000	-1000	-1000	-1000	-1000	-1000	-1000	0	1	0	0	1	0	0	1	0
-1	401940	PRAMEF3	NM_001013692	1	1	13200782	13204278	13201419	13204251	-1000	-1000	-1000	-1000	-1000	-1000	-0.903188	4.09671	-2.26659	0.0818	0.348491	-4.63771	-1000	-1000	-1000	-1000	-1000	-1000	-1000	-1000	-1000	-1000	-1000	-1000	-1000	-1000	-1000	-1000	-1000	-1000	-1000	0	1	0	0	1	0	0	1	0
86357	343068	PRAMEF5	NM_001013407	1	0	13232405	13241643	13237477	13241319	-1000	-1000	-1000	-1000	-1000	-1000	-1000	-1000	-1000	-1000	-1000	-1000	-1000	-1000	-1000	-1000	-1000	-1000	-1000	-1000	-1000	-1000	-1000	-1000	-1000	-1000	-1000	-1000	-1000	-1000	-1000	0	1	0	0	1	0	0	1	0
-1	440561	PRAMEF6	NM_001010889	1	0	13237477	13241318	13237477	13241318	-1000	-1000	-1000	-1000	-1000	-1000	-1000	-1000	-1000	-1000	-1000	-1000	-1000	-1000	-1000	-1000	-1000	-1000	-1000	-1000	-1000	-1000	-1000	-1000	-1000	-1000	-1000	-1000	-1000	-1000	-1000	0	1	0	0	1	0	0	1	0
-1	391002	PRAMEF8	NM_001012276	1	1	13259235	13263351	13259568	13262288	-1000	-1000	-1000	-1000	-1000	-1000	-1.4305	3.56769	-3.10277	0.033	0.251482	-3.65176	-1000	-1000	-1000	-1000	-1000	-1000	-1000	-1000	-1000	-1000	-1000	-1000	-1000	-1000	-1000	-1000	-1000	-1000	-1000	0	1	0	0	1	0	0	1	0
-1	343070	PRAMEF9	NM_001010890	1	0	13293762	13300777	13296589	13300445	-1000	-1000	-1000	-1000	-1000	-1000	-1000	-1000	-1000	-1000	-1000	-1000	-1000	-1000	-1000	-1000	-1000	-1000	-1000	-1000	-1000	-1000	-1000	-1000	-1000	-1000	-1000	-1000	-1000	-1000	-1000	0	1	0	0	1	0	0	1	0
-1	-1	PRAMEF16	NM_001045480	1	0	13367840	13370843	13367870	13370714	-1000	-1000	-1000	-1000	-1000	-1000	-0.274827	2.59113	-0.867161	0.432	0.689214	-6.24963	-1000	-1000	-1000	-1000	-1000	-1000	-1000	-1000	-1000	-1000	-1000	-1000	-1000	-1000	-1000	-1000	-1000	-1000	-1000	0	1	0	0	1	0	0	1	0
-1	391002	PRAMEF8	NM_001012276	1	1	13480020	13484136	13480353	13483073	-1000	-1000	-1000	-1000	-1000	-1000	-1.4305	3.56769	-3.10277	0.033	0.251482	-3.65176	-1000	-1000	-1000	-1000	-1000	-1000	-1000	-1000	-1000	-1000	-1000	-1000	-1000	-1000	-1000	-1000	-1000	-1000	-1000	0	1	0	0	1	0	0	1	0
77553	441871	PRAMEF7	NM_001012277	1	1	13480354	13483073	13480354	13483073	-1000	-1000	-1000	-1000	-1000	-1000	-1000	-1000	-1000	-1000	-1000	-1000	-1000	-1000	-1000	-1000	-1000	-1000	-1000	-1000	-1000	-1000	-1000	-1000	-1000	-1000	-1000	-1000	-1000	-1000	-1000	0	1	0	0	1	0	0	1	0
-1	343070	PRAMEF9	NM_001010890	1	0	13514559	13521574	13517386	13521242	-1000	-1000	-1000	-1000	-1000	-1000	-1000	-1000	-1000	-1000	-1000	-1000	-1000	-1000	-1000	-1000	-1000	-1000	-1000	-1000	-1000	-1000	-1000	-1000	-1000	-1000	-1000	-1000	-1000	-1000	-1000	0	1	0	0	1	0	0	1	0
4729	10630	PDPN	NM_006474	1	0	13782838	13817036	13782887	13814992	-0.0707787	3.89022	-1.15467	0.268	0.49	-6.81719	0.473847	11.2341	0.966395	0.385	0.652823	-6.15762	2321182	0.217553	5.38877	0.823493	-1000	-1000	-1000	-0.126235	5.16883	-0.805948	-1000	-1000	-1000	0.0373313	4.93585	0.0914309	-1000	-1000	-1000	0	1	0	0	1	0	0	1	0
4729	10630	PDPN	NM_198389	1	0	13782838	13817036	13782887	13814992	-0.0707787	3.89022	-1.15467	0.268	0.49	-6.81719	0.473847	11.2341	0.966395	0.385	0.652823	-6.15762	2321182	0.217553	5.38877	0.823493	-1000	-1000	-1000	-0.126235	5.16883	-0.805948	-1000	-1000	-1000	0.0373313	4.93585	0.0914309	-1000	-1000	-1000	0	1	0	0	1	0	0	1	0
4729	10630	PDPN	NM_001006624	1	0	13784553	13817036	13806313	13814992	-0.0707787	3.89022	-1.15467	0.268	0.49	-6.81719	0.473847	11.2341	0.966395	0.385	0.652823	-6.15762	2321182	0.217553	5.38877	0.823493	-1000	-1000	-1000	-0.126235	5.16883	-0.805948	-1000	-1000	-1000	0.0373313	4.93585	0.0914309	-1000	-1000	-1000	0	1	0	0	1	0	0	1	0
4729	10630	PDPN	NM_001006625	1	0	13784553	13817036	13806313	13814992	-0.0707787	3.89022	-1.15467	0.268	0.49	-6.81719	0.473847	11.2341	0.966395	0.385	0.652823	-6.15762	2321182	0.217553	5.38877	0.823493	-1000	-1000	-1000	-0.126235	5.16883	-0.805948	-1000	-1000	-1000	0.0373313	4.93585	0.0914309	-1000	-1000	-1000	0	1	0	0	1	0	0	1	0
40822	7799	PRDM2	NM_015866	1	0	13903936	13987155	13914687	13985608	-0.914466	10.1748	-6.74488	1.19e-05	0.000119	3.07835	1.46941	7.67316	4.27673	0.0112	0.176231	-2.45472	2321238	-1.29248	11.0498	-11.4214	4.88e-06	4.2e-05	4.56735	-0.838298	10.6741	-7.38216	3.79e-05	0.00012	2.00113	-0.878326	10.0044	-11.7291	1.69e-06	1.53e-05	5.52114	0	0	1	0	0	1	0	0	1
40822	7799	PRDM2	NM_012231	1	0	13903936	14024161	13914687	14015628	-0.914466	10.1748	-6.74488	1.19e-05	0.000119	3.07835	1.52097	7.70152	6.34903	0.00251	0.124589	-0.852621	2321238	-1.29248	11.0498	-11.4214	4.88e-06	4.2e-05	4.56735	-0.838298	10.6741	-7.38216	3.79e-05	0.00012	2.00113	-0.878326	10.0044	-11.7291	1.69e-06	1.53e-05	5.52114	0	0	1	0	0	1	0	0	1
40822	7799	PRDM2	NM_001007257	1	0	13948462	13987155	13972251	13985608	-0.914466	10.1748	-6.74488	1.19e-05	0.000119	3.07835	1.46941	7.67316	4.27673	0.0112	0.176231	-2.45472	2321238	-1.29248	11.0498	-11.4214	4.88e-06	4.2e-05	4.56735	-0.838298	10.6741	-7.38216	3.79e-05	0.00012	2.00113	-0.878326	10.0044	-11.7291	1.69e-06	1.53e-05	5.52114	0	0	1	0	0	1	0	0	1
16235	23254	KIAA1026	NM_015209	1	0	14797799	15264878	14798080	15264878	2.84039	7.67555	16.3848	3.09e-10	3.7e-08	13.9821	0.685759	5.34773	2.89769	0.0408	0.270648	-3.88457	2321466	0.576625	7.63489	5.98582	0.000409	0.00113	-0.287325	-0.0366633	8.42615	-0.327809	0.75	0.784	-7.74253	-0.155314	7.97602	-1.29835	0.229	0.279	-6.90943	0	1	0	0	1	0	1	0	0
16235	23254	KIAA1026	NM_001018000	1	0	15123212	15265158	15123447	15264879	2.84039	7.67555	16.3848	3.09e-10	3.7e-08	13.9821	0.685759	5.34773	2.89769	0.0408	0.270648	-3.88457	2321466	0.576625	7.63489	5.98582	0.000409	0.00113	-0.287325	-0.0366633	8.42615	-0.327809	0.75	0.784	-7.74253	-0.155314	7.97602	-1.29835	0.229	0.279	-6.90943	0	1	0	0	1	0	1	0	0
16235	23254	KIAA1026	NM_001018001	1	0	15128882	15264878	15159822	15264878	2.84039	7.67555	16.3848	3.09e-10	3.7e-08	13.9821	0.685759	5.34773	2.89769	0.0408	0.270648	-3.88457	2321466	0.576625	7.63489	5.98582	0.000409	0.00113	-0.287325	-0.0366633	8.42615	-0.327809	0.75	0.784	-7.74253	-0.155314	7.97602	-1.29835	0.229	0.279	-6.90943	0	1	0	0	1	0	1	0	0
16235	23254	KIAA1026	NM_001017999	1	0	15145001	15264878	15159822	15264878	2.84039	7.67555	16.3848	3.09e-10	3.7e-08	13.9821	0.685759	5.34773	2.89769	0.0408	0.270648	-3.88457	2321466	0.576625	7.63489	5.98582	0.000409	0.00113	-0.287325	-0.0366633	8.42615	-0.327809	0.75	0.784	-7.74253	-0.155314	7.97602	-1.29835	0.229	0.279	-6.90943	0	1	0	0	1	0	1	0	0
-1	399563	FLJ43806	NM_201628	1	0	15300683	15317124	15300737	15313717	-1000	-1000	-1000	-1000	-1000	-1000	-1000	-1000	-1000	-1000	-1000	-1000	2321466	0.576625	7.63489	5.98582	0.000409	0.00113	-0.287325	-0.0366633	8.42615	-0.327809	0.75	0.784	-7.74253	-0.155314	7.97602	-1.29835	0.229	0.279	-6.90943	0	1	0	0	1	0	1	0	0
-1	200197	C1orf126	NM_182534	1	1	15315035	15351546	15319774	15351495	-1000	-1000	-1000	-1000	-1000	-1000	-1000	-1000	-1000	-1000	-1000	-1000	-1000	-1000	-1000	-1000	-1000	-1000	-1000	-1000	-1000	-1000	-1000	-1000	-1000	-1000	-1000	-1000	-1000	-1000	-1000	0	1	0	0	1	0	0	1	0
9966	55092	TMEM51	NM_018022	1	0	15352815	15419458	15414170	15418825	0.113488	6.17369	0.530791	0.604	0.783	-7.34863	0.104209	9.13566	0.341663	0.749	0.890325	-6.59978	2321645	-0.147927	5.56556	-0.445616	-1000	-1000	-1000	-0.387154	5.56296	-1.72716	-1000	-1000	-1000	-0.114228	6.51118	-0.499489	-1000	-1000	-1000	0	1	0	0	1	0	0	1	0
32580	79180	EFHD2	NM_024329	1	0	15609027	15629420	15609054	15627806	0.435021	10.0639	5.0831	0.000192	0.00128	0.190372	0.346886	7.80967	0.744429	0.495	0.737175	-6.35359	2321779	0.280539	9.95068	2.82902	0.0235	0.0378	-4.64718	0.304596	10.2285	2.57616	0.0295	0.0438	-5.03908	-0.377794	10.559	-3.28403	0.0104	0.0173	-3.89598	1	0	0	0	0	1	1	0	0
21422	11330	CTRC	NM_007272	1	0	15637524	15645739	15637547	15645670	-0.0916704	7.09026	-0.851891	0.409	0.634	-7.1194	0.37883	5.15782	1.59262	0.182	0.476748	-5.46568	2321797	-0.404287	5.96694	-0.946316	-1000	-1000	-1000	0.122929	5.80109	0.605697	-1000	-1000	-1000	-0.673496	6.34893	-2.90755	-1000	-1000	-1000	0	1	0	0	1	0	0	1	0
40598	63036	ELA2A	NM_033440	1	0	15655810	15671166	15655835	15671088	0.0574377	4.65442	0.784214	0.447	0.665	-7.17588	-0.062426	6.67202	-0.269384	0.8	0.915683	-6.62601	2321813	0.708372	6.29901	2.28963	-1000	-1000	-1000	0.116865	6.70854	0.647383	-1000	-1000	-1000	-0.71483	6.92301	-2.22733	0.055	0.0778	-5.59084	0	1	0	0	1	0	0	1	0
88835	51032	ELA2B	NM_015849	1	0	15675182	15690480	15675207	15690393	0.0574377	4.65442	0.784214	0.447	0.665	-7.17588	0.288636	5.31717	1.23688	0.28	0.569728	-5.87769	2321813	0.708372	6.29901	2.28963	-1000	-1000	-1000	0.116865	6.70854	0.647383	-1000	-1000	-1000	-0.71483	6.92301	-2.22733	0.055	0.0778	-5.59084	0	1	0	0	1	0	0	1	0
31024	842	CASP9	NM_001229	1	1	15691383	15723376	15692024	15723281	-0.312085	7.50697	-3.35419	0.005	0.0211	-3.12926	-0.40215	9.11714	-1.3948	0.231	0.528311	-5.69934	2397695	-0.32617	8.67465	-2.95034	0.0196	0.0323	-4.45929	-0.76009	8.84571	-6.18077	0.00015	0.000385	0.512847	-0.571686	8.31287	-9.60202	8.17e-06	4.54e-05	3.81451	0	0	1	0	0	1	0	0	1
31024	842	CASP9	NM_032996	1	1	15691383	15723376	15692024	15723281	-0.312085	7.50697	-3.35419	0.005	0.0211	-3.12926	-0.40215	9.11714	-1.3948	0.231	0.528311	-5.69934	2397695	-0.32617	8.67465	-2.95034	0.0196	0.0323	-4.45929	-0.76009	8.84571	-6.18077	0.00015	0.000385	0.512847	-0.571686	8.31287	-9.60202	8.17e-06	4.54e-05	3.81451	0	0	1	0	0	1	0	0	1
45414	23341	DNAJC16	NM_015291	1	0	15725938	15770812	15728187	15767258	-0.505924	6.31527	-5.40939	0.000108	0.000779	0.786347	0.391698	7.92966	1.21366	0.288	0.57557	-5.90312	2321849	-0.675336	10.5541	-5.92976	0.000434	0.00119	-0.353045	-0.65754	10.0447	-7.49754	3.35e-05	0.000108	2.13486	-0.523885	9.96963	-8.26605	2.58e-05	0.000104	2.56413	0	0	1	0	0	1	0	0	1
99855	79814	AGMAT	NM_024758	1	1	15771738	15784191	15772732	15784048	0.347472	7.03242	2.82878	0.0139	0.0505	-4.14069	-2.01469	6.03946	-6.23338	0.0027	0.125629	-0.927759	2397732	0.70283	8.03175	7.09089	0.000135	0.000463	0.928108	0.471327	7.50095	4.20087	0.00221	0.00417	-2.36134	0.454619	7.82299	4.60931	0.00152	0.00315	-1.86046	1	0	0	1	0	0	1	0	0
90870	84301	DDI2	NM_032341	1	0	15816656	15859334	15816752	15855714	0.194384	6.39705	2.28877	0.039	0.119	-5.1311	-1000	-1000	-1000	-1000	-1000	-1000	2321942	0.408721	9.89448	3.67746	0.00688	0.0128	-3.35347	0.382771	10.6222	3.68377	0.00489	0.00854	-3.19613	0.332658	9.53973	4.48608	0.0018	0.00365	-2.04054	1	0	0	1	0	0	1	0	0
68518	6248	RSC1A1	NM_006511	1	0	15858950	15860802	15858950	15860802	0.639224	8.90781	7.57448	3.41e-06	4.17e-05	4.38016	-0.13874	7.63003	-0.53676	0.618	0.817163	-6.50047	2321942	0.408721	9.89448	3.67746	0.00688	0.0128	-3.35347	0.0653225	9.10274	0.846703	0.419	0.469	-7.41956	0.403788	9.04185	4.25267	0.00249	0.00483	-2.3873	0	1	0	1	0	0	1	0	0
68806	284723	SLC25A34	NM_207348	1	0	15935395	15940470	15935567	15938487	-0.325908	7.55826	-2.94482	0.0111	0.0417	-3.91999	-1000	-1000	-1000	-1000	-1000	-1000	2322004	-0.211648	8.09685	-1.15475	0.283	0.339	-7.03541	-0.524989	8.63612	-4.05397	0.00276	0.00509	-2.59551	-0.240965	7.81272	-1.5868	0.149	0.19	-6.53759	0	0	1	0	1	0	0	1	0
27088	388595	LOC388595	NM_001013641	1	0	15941503	15947061	15941641	15946713	-1000	-1000	-1000	-1000	-1000	-1000	-1000	-1000	-1000	-1000	-1000	-1000	-1000	-1000	-1000	-1000	-1000	-1000	-1000	-1000	-1000	-1000	-1000	-1000	-1000	-1000	-1000	-1000	-1000	-1000	-1000	0	1	0	0	1	0	0	1	0
56774	54751	FBLIM1	NM_017556	1	0	15957841	15985672	15964065	15983742	-0.218427	4.45092	-2.76904	0.0156	0.0557	-4.25348	0.438712	10.3486	1.28479	0.264	0.556343	-5.82453	2322036	0.200897	4.98083	0.510839	-1000	-1000	-1000	0.335597	5.00086	2.13226	-1000	-1000	-1000	0.639902	4.59266	2.02161	-1000	-1000	-1000	0	1	0	0	1	0	0	1	0
56774	54751	FBLIM1	NM_001024215	1	0	15963580	15974301	15964065	15974112	-0.218427	4.45092	-2.76904	0.0156	0.0557	-4.25348	-0.0355533	6.99498	-0.116813	0.912	0.967328	-6.66143	2322036	0.200897	4.98083	0.510839	-1000	-1000	-1000	0.335597	5.00086	2.13226	-1000	-1000	-1000	0.639902	4.59266	2.02161	-1000	-1000	-1000	0	1	0	0	1	0	0	1	0
56774	54751	FBLIM1	NM_001024216	1	0	15964045	15985672	15964065	15983742	-0.218427	4.45092	-2.76904	0.0156	0.0557	-4.25348	0.438712	10.3486	1.28479	0.264	0.556343	-5.82453	2322036	0.200897	4.98083	0.510839	-1000	-1000	-1000	0.335597	5.00086	2.13226	-1000	-1000	-1000	0.639902	4.59266	2.02161	-1000	-1000	-1000	0	1	0	0	1	0	0	1	0
8992	23013	SPEN	NM_015001	1	0	16046945	16139536	16047149	16138508	0.459883	8.73078	6.40242	2.05e-05	0.000187	2.51385	-0.418598	7.00559	-1.52522	0.197	0.493297	-5.54631	2322103	0.0421577	10.4156	0.261879	0.8	0.831	-7.69064	0.0450378	12.1518	0.576949	0.578	0.623	-7.62066	0.0103327	9.82737	0.131454	0.899	0.916	-7.7577	0	1	0	0	1	0	0	1	0
2575	7709	ZBTB17	NM_003443	1	1	16140952	16175100	16141050	16147576	-0.304379	7.51067	-4.27537	0.00085	0.00459	-1.33632	0.252845	8.86502	0.805253	0.463	0.713626	-6.30352	2397847	-0.267238	8.77486	-1.90909	0.0948	0.129	-6.04909	-0.494394	9.72309	-6.73521	7.79e-05	0.00022	1.2221	-0.490068	9.09922	-4.92943	0.000996	0.00218	-1.40259	0	0	1	0	0	1	0	1	0
18717	149563	C1orf64	NM_178840	1	0	16203317	16205766	16203385	16205427	0.105559	6.55314	0.96223	0.353	0.58	-7.01841	-1.73217	5.42566	-4.89993	0.00678	0.155205	-1.91073	-1000	-1000	-1000	-1000	-1000	-1000	-1000	-1000	-1000	-1000	-1000	-1000	-1000	-1000	-1000	-1000	-1000	-1000	-1000	0	1	0	0	1	0	0	1	0
8480	27129	HSPB7	NM_014424	1	1	16213111	16217537	16214661	16217044	-0.0948636	6.38081	-1.13587	0.276	0.5	-6.83819	-0.335581	2.07458	-0.920543	0.406	0.67008	-6.20096	2397898	0.228163	6.01546	0.738328	-1000	-1000	-1000	0.805681	5.756	3.60422	-1000	-1000	-1000	0.256984	5.76173	1.01719	-1000	-1000	-1000	0	1	0	0	1	0	0	1	0
-1	-1	CLCNKA	NM_004070	1	0	16221072	16233130	16221701	16232739	-1000	-1000	-1000	-1000	-1000	-1000	-0.963536	5.62574	-1.97388	0.115	0.395337	-4.99875	2322226	0.137123	6.5578	0.43802	-1000	-1000	-1000	-0.937463	6.84392	-2.84927	0.0188	0.029	-4.58481	-0.0726715	6.26195	-0.235997	-1000	-1000	-1000	0	0	1	0	1	0	0	1	0
107317	1187	CLCNKA	NM_001042704	1	0	16221072	16233130	16221701	16232739	-0.036108	6.04402	-0.470935	0.645	0.809	-7.38016	-0.963536	5.62574	-1.97388	0.115	0.395337	-4.99875	2322226	0.137123	6.5578	0.43802	-1000	-1000	-1000	-0.937463	6.84392	-2.84927	0.0188	0.029	-4.58481	-0.0726715	6.26195	-0.235997	-1000	-1000	-1000	0	0	1	0	1	0	0	1	0
65	1188	CLCNKB	NM_000085	1	0	16242938	16256062	16243574	16255997	-0.167687	7.35505	-2.23468	0.0431	0.128	-5.22579	0.0809963	4.47341	0.348759	0.744	0.88748	-6.59689	2322226	0.137123	6.5578	0.43802	-1000	-1000	-1000	-0.937463	6.84392	-2.84927	0.0188	0.029	-4.58481	-0.0726715	6.26195	-0.235997	-1000	-1000	-1000	0	0	1	0	1	0	0	1	0
18806	348487	C1orf117	NM_182623	1	1	16256851	16272681	16257518	16272523	0.061832	6.92431	0.64295	0.531	0.731	-7.27989	0.00280133	11.9316	0.0121167	0.991	0.996711	-6.66961	2397926	0.050242	5.65823	0.156394	-1000	-1000	-1000	-0.420698	5.53123	-2.25411	-1000	-1000	-1000	0.271342	5.36601	0.720968	-1000	-1000	-1000	0	1	0	0	1	0	0	1	0
20929	1969	EPHA2	NM_004431	1	1	16323419	16355150	16324296	16355013	0.207899	6.72681	1.59945	0.133	0.305	-6.2442	-0.237577	8.05852	-0.527667	0.624	0.82032	-6.50598	2397948	0.0379017	8.32882	0.165922	0.873	0.894	-7.71369	0.0244042	8.75243	0.115735	0.91	0.925	-7.79427	0.295624	8.00414	1.81884	0.105	0.139	-6.20991	0	1	0	0	1	0	0	1	0
17710	128272	ARHGEF19	NM_153213	1	1	16397185	16411690	16397668	16408135	0.0232326	6.64914	0.384672	0.707	0.847	-7.41917	-0.635889	8.54859	-1.79818	0.142	0.432314	-5.21546	2397999	-0.0977553	8.51236	-0.196938	0.849	0.874	-7.70736	-0.530796	11.0277	-1.54185	0.157	0.197	-6.63167	-1.2043	10.0043	-5.90407	0.000298	0.000767	-0.0974284	0	1	0	0	0	1	0	1	0
12793	79363	C1orf89	NM_030907	1	1	16430782	16436032	16431129	16435823	-0.0180914	6.97252	-0.207406	0.839	0.922	-7.475	0.008802	4.32271	0.0348068	0.974	0.990378	-6.66897	-1000	-1000	-1000	-1000	-1000	-1000	-1000	-1000	-1000	-1000	-1000	-1000	-1000	-1000	-1000	-1000	-1000	-1000	-1000	0	1	0	0	1	0	0	1	0
16234	54455	FBXO42	NM_018994	1	1	16449146	16551534	16449751	16514499	-0.447706	7.32738	-5.03911	0.000208	0.00137	0.109009	0.410958	9.03336	1.27875	0.266	0.558033	-5.83129	2398073	-0.314042	10.1388	-1.92785	0.0921	0.126	-6.02176	-0.342816	12.1583	-3.0328	0.0139	0.0221	-4.27782	-0.727694	10.1129	-5.84972	0.000318	0.000807	-0.166743	0	0	1	0	0	1	0	1	0
9213	26099	C1orf144	NM_015609	1	0	16566306	16595450	16566346	16594221	0.402956	8.61847	3.18758	0.00692	0.0278	-3.45282	-0.717693	9.88052	-3.02568	0.0358	0.258295	-3.73849	2322362	0.342619	11.074	2.26066	0.0555	0.0806	-5.52434	0.136412	10.5338	1.19408	0.262	0.311	-7.06807	-0.310603	11.1571	-3.97478	0.00371	0.00684	-2.80946	0	1	0	0	0	1	0	1	0
18639	374955	SPATA21	NM_198546	1	1	16597724	16636505	16597846	16630452	0.0206655	6.6241	0.140562	0.89	0.948	-7.48743	-1000	-1000	-1000	-1000	-1000	-1000	2398146	0.0890233	7.16262	0.875958	0.408	0.466	-7.31631	-0.161764	7.2311	-0.937792	0.372	0.423	-7.33678	0.567039	7.17976	1.63494	0.139	0.178	-6.47144	0	1	0	0	1	0	0	1	0
9168	55707	NECAP2	NM_018090	1	0	16639819	16659158	16639843	16657971	-1.06106	9.76278	-11.0627	4.18e-08	1.24e-06	8.96015	0.245528	10.7442	1.08783	0.334	0.612818	-6.03666	2322389	-1.18083	10.9881	-11.5633	4.46e-06	3.94e-05	4.66397	-1.17555	10.78	-9.34288	5.52e-06	2.56e-05	4.08389	-1.43859	10.6061	-11.6343	1.8e-06	1.59e-05	5.45133	0	0	1	0	0	1	0	0	1
-1	440570	LOC440570	NM_001013708	1	1	16732936	16736069	16734567	16735097	-1000	-1000	-1000	-1000	-1000	-1000	-1000	-1000	-1000	-1000	-1000	-1000	-1000	-1000	-1000	-1000	-1000	-1000	-1000	-1000	-1000	-1000	-1000	-1000	-1000	-1000	-1000	-1000	-1000	-1000	-1000	0	1	0	0	1	0	0	1	0
-1	440673	NBPF10	NM_001039703	1	1	16762998	16791275	16763024	16784744	-1000	-1000	-1000	-1000	-1000	-1000	0.628005	14.441	2.62711	0.0546	0.302749	-4.20145	2355365	-0.839409	11.3426	-4.46118	0.00242	0.00516	-2.22874	-0.726424	12.1253	-8.38301	1.36e-05	5.17e-05	3.11257	-0.838819	10.1838	-6.97918	9.07e-05	0.000284	1.19493	0	0	1	0	0	1	0	0	1
-1	55672	NBPF1	NM_017940	1	1	16762998	16812568	16763024	16791102	-0.858455	11.0711	-9.83833	1.71e-07	3.72e-06	7.49974	0.628005	14.441	2.62711	0.0546	0.302749	-4.20145	-1000	-1000	-1000	-1000	-1000	-1000	-1000	-1000	-1000	-1000	-1000	-1000	-1000	-1000	-1000	-1000	-1000	-1000	-1000	0	1	0	0	1	0	0	1	0
-1	440570	LOC440570	NM_001013708	1	0	17070026	17073160	17070998	17071528	-1000	-1000	-1000	-1000	-1000	-1000	-1000	-1000	-1000	-1000	-1000	-1000	-1000	-1000	-1000	-1000	-1000	-1000	-1000	-1000	-1000	-1000	-1000	-1000	-1000	-1000	-1000	-1000	-1000	-1000	-1000	0	1	0	0	1	0	0	1	0
16811	9696	CROCC	NM_014675	1	0	17121031	17172046	17121100	17171527	0.30672	7.01194	2.71722	0.0172	0.0606	-4.35076	-0.47505	6.04837	-1.25498	0.274	0.564701	-5.85771	2322598	-0.029247	8.17371	-0.231377	0.823	0.851	-7.69907	-0.629463	6.95262	-3.22907	0.0101	0.0165	-3.94964	-0.127584	8.13395	-1.2818	0.234	0.285	-6.92933	0	0	1	0	1	0	0	1	0
1801	4237	MFAP2	NM_002403	1	1	17173585	17179725	17174001	17177354	0.125049	6.89595	1.63411	0.126	0.293	-6.194	-0.0176933	9.0068	-0.0665332	0.95	0.982696	-6.66701	2398706	0.202409	5.73298	0.802149	-1000	-1000	-1000	0.228922	6.36007	1.2724	-1000	-1000	-1000	-0.153016	6.39938	-0.629783	-1000	-1000	-1000	0	1	0	0	1	0	0	1	0
1801	4237	MFAP2	NM_017459	1	1	17173585	17180667	17174001	17177354	0.125049	6.89595	1.63411	0.126	0.293	-6.194	-0.0176933	9.0068	-0.0665332	0.95	0.982696	-6.66701	2398706	0.202409	5.73298	0.802149	-1000	-1000	-1000	0.228922	6.36007	1.2724	-1000	-1000	-1000	-0.153016	6.39938	-0.629783	-1000	-1000	-1000	0	1	0	0	1	0	0	1	0
56940	23400	ATP13A2	NM_022089	1	1	17185039	17210853	17185302	17210819	0.307794	7.14817	3.58125	0.00322	0.0144	-2.68633	0.784987	6.88063	2.68361	0.0513	0.295272	-4.13443	2398736	-0.0144803	8.23058	-0.0791449	0.939	0.95	-7.72568	-0.421565	9.04003	-4.81086	0.00091	0.00189	-1.4183	-0.0386958	8.39934	-0.420485	0.685	0.73	-7.66962	0	0	1	0	1	0	0	1	0
2255	6390	SDHB	NM_003000	1	1	17217813	17253251	17217962	17253100	1.50961	9.42629	13.848	2.6e-09	1.61e-07	11.818	0.478728	11.2596	2.09712	0.0995	0.375428	-4.84642	2398789	1.62962	10.5388	11.2121	5.57e-06	4.58e-05	4.42276	1.01182	9.81229	5.00456	0.000695	0.00148	-1.12935	0.439646	11.5356	4.10863	0.00306	0.00579	-2.60489	1	0	0	1	0	0	1	0	0
7214	11240	PADI2	NM_007365	1	1	17267839	17318516	17268125	17318452	-0.0887599	3.8805	-1.54274	0.146	0.326	-6.32474	-1.18399	5.44259	-3.39873	0.0246	0.227211	-3.32795	2398820	-0.0757553	6.20091	-0.343415	-1000	-1000	-1000	-0.970602	6.55049	-8.01441	1.96e-05	6.92e-05	2.71571	-0.845792	6.38013	-3.65911	-1000	-1000	-1000	0	0	1	0	1	0	0	1	0
7881	29943	PADI1	NM_013358	1	0	17404216	17443932	17404299	17443324	-0.14603	5.40105	-1.25591	0.231	0.444	-6.69931	-0.228229	3.45735	-0.944341	0.395	0.660634	-6.17863	2322786	0.325782	6.0735	1.38719	-1000	-1000	-1000	-0.0493953	5.56814	-0.270029	-1000	-1000	-1000	0.517374	5.76741	1.26678	-1000	-1000	-1000	0	1	0	0	1	0	0	1	0
7882	51702	PADI3	NM_016233	1	0	17448179	17483311	17448219	17482160	-0.03895	7.22997	-0.661415	0.52	0.723	-7.26739	-1.05999	3.65928	-2.32632	0.0764	0.340152	-4.56456	2322818	-0.506761	4.85743	-0.469989	-1000	-1000	-1000	0.651431	5.12412	0.9524	-1000	-1000	-1000	1.03848	4.8429	1.46557	-1000	-1000	-1000	0	1	0	0	1	0	0	1	0
7883	23569	PADI4	NM_012387	1	0	17507278	17563081	17507304	17562836	0.131133	4.18165	2.20022	0.0459	0.135	-5.2856	0.879595	2.79559	1.80156	0.141	0.431683	-5.2113	2322848	-0.331019	6.30879	-1.13936	-1000	-1000	-1000	-0.115021	5.8054	-0.582633	-1000	-1000	-1000	-0.341592	6.48193	-1.62755	-1000	-1000	-1000	0	1	0	0	1	0	0	1	0
17695	353238	PADI6	NM_207421	1	0	17571327	17600781	17571327	17600520	-1000	-1000	-1000	-1000	-1000	-1000	-1000	-1000	-1000	-1000	-1000	-1000	2322894	0.11803	6.06214	0.502318	-1000	-1000	-1000	0.172117	5.60443	1.2305	-1000	-1000	-1000	-0.116355	5.98532	-0.558775	-1000	-1000	-1000	0	1	0	0	1	0	0	1	0
10282	55920	RCC2	NM_018715	1	1	17605865	17638806	17608172	17637596	0.71883	10.7495	10.0208	1.37e-07	3.1e-06	7.72651	-1.3883	11.2873	-5.6921	0.00384	0.138628	-1.29971	2398894	0.631714	12.1742	5.29511	0.00088	0.00216	-1.12647	0.771227	12.1039	7.45044	3.52e-05	0.000113	2.08045	0.517513	11.4642	8.79419	1.61e-05	7.31e-05	3.07739	1	0	0	1	0	0	1	0	0
10017	55160	ARHGEF10L	NM_018125	1	0	17738916	17896955	17779677	17896461	-0.179921	4.75501	-2.27821	0.0397	0.12	-5.14966	0.387899	9.74172	1.05498	0.347	0.622131	-6.07021	2322957	0.0584093	7.10557	0.496794	0.633	0.679	-7.59199	-0.135677	6.81634	-0.801921	-1000	-1000	-1000	-0.0136785	6.89024	-0.0660271	-1000	-1000	-1000	0	1	0	0	1	0	0	1	0
10017	55160	ARHGEF10L	NM_001011722	1	0	17779634	17896955	17779677	17896461	-0.179921	4.75501	-2.27821	0.0397	0.12	-5.14966	0.387899	9.74172	1.05498	0.347	0.622131	-6.07021	2322957	0.0584093	7.10557	0.496794	0.633	0.679	-7.59199	-0.135677	6.81634	-0.801921	-1000	-1000	-1000	-0.0136785	6.89024	-0.0660271	-1000	-1000	-1000	0	1	0	0	1	0	0	1	0
57127	81569	ACTL8	NM_030812	1	0	17954430	18026142	18022090	18025600	-0.12365	7.19313	-1.60827	0.131	0.302	-6.23149	-0.722695	4.48324	-2.87639	0.0418	0.272769	-3.90913	2323087	0.0973313	6.84721	0.266833	-1000	-1000	-1000	0.001817	6.12086	0.00516167	-1000	-1000	-1000	-0.345243	7.03709	-1.61418	0.143	0.183	-6.50009	0	1	0	0	1	0	0	1	0
13153	84966	IGSF21	NM_032880	1	0	18306826	18577562	18307209	18577406	-0.0157746	5.51737	-0.238034	0.815	0.909	-7.46772	-2.37158	8.67158	-3.29416	0.0273	0.235465	-3.44068	2323172	0.0565467	5.23963	0.180276	-1000	-1000	-1000	-0.0161375	5.29452	-0.101438	-1000	-1000	-1000	0.213795	4.88891	0.628229	-1000	-1000	-1000	0	1	0	0	1	0	0	1	0
17567	127707	KLHDC7A	NM_152375	1	0	18680010	18685064	18680062	18682395	-0.150422	6.06886	-1.43093	0.175	0.371	-6.47751	-0.749466	12.0023	-3.24145	0.0287	0.240174	-3.49821	2323285	0.150019	7.54121	0.994414	0.351	0.409	-7.20417	-0.0800638	7.19604	-0.589754	0.57	0.615	-7.61269	-0.10969	7.3441	-1.01314	0.339	0.396	-7.22651	0	1	0	0	1	0	0	1	0
55665	5081	PAX7	NM_002584	1	0	18830086	18935217	18830684	18935119	-0.115118	6.10619	-1.37859	0.191	0.392	-6.54612	-0.300902	5.70151	-0.973174	0.382	0.650553	-6.1511	2323347	-0.392524	5.9232	-1.23036	-1000	-1000	-1000	-0.0184557	5.71391	-0.111312	-1000	-1000	-1000	-0.202199	6.15267	-1.06766	-1000	-1000	-1000	0	1	0	0	1	0	0	1	0
55665	5081	PAX7	NM_013945	1	0	18830086	18935217	18830684	18935119	-0.115118	6.10619	-1.37859	0.191	0.392	-6.54612	-0.300902	5.70151	-0.973174	0.382	0.650553	-6.1511	2323347	-0.392524	5.9232	-1.23036	-1000	-1000	-1000	-0.0184557	5.71391	-0.111312	-1000	-1000	-1000	-0.202199	6.15267	-1.06766	-1000	-1000	-1000	0	1	0	0	1	0	0	1	0
75323	80834	TAS1R2	NM_152232	1	1	19038679	19058741	19038679	19058740	0.078578	5.99071	0.884541	0.392	0.618	-7.09065	-0.386219	4.0068	-1.10625	0.327	0.606452	-6.01759	2399289	0.232927	5.97492	0.973604	-1000	-1000	-1000	0.123895	6.00268	0.672194	-1000	-1000	-1000	0.495839	6.39061	0.953617	-1000	-1000	-1000	0	1	0	0	1	0	0	1	0
6081	8659	ALDH4A1	NM_003748	1	1	19070512	19101658	19071925	19101603	0.261414	7.70294	2.77872	0.0153	0.0548	-4.23523	0.111128	10.5598	0.274677	0.796	0.913712	-6.62429	2399302	1.04875	7.66887	6.897	0.000162	0.000536	0.725363	0.574889	7.80526	6.05139	0.000176	0.000443	0.341533	0.609951	7.77584	7.69541	4.41e-05	0.000158	1.97889	1	0	0	1	0	0	1	0	0
6081	8659	ALDH4A1	NM_170726	1	1	19070512	19101658	19071925	19101603	0.261414	7.70294	2.77872	0.0153	0.0548	-4.23523	0.111128	10.5598	0.274677	0.796	0.913712	-6.62429	2399302	1.04875	7.66887	6.897	0.000162	0.000536	0.725363	0.574889	7.80526	6.05139	0.000176	0.000443	0.341533	0.609951	7.77584	7.69541	4.41e-05	0.000158	1.97889	1	0	0	1	0	0	1	0	0
10804	23352	ZUBR1	NM_020765	1	1	19273588	19409332	19273912	19409328	0.196762	4.95756	3.5202	0.00362	0.016	-2.80554	-0.43069	10.5355	-1.91025	0.124	0.408011	-5.07738	2399409	-0.083139	11.0453	-0.569845	0.585	0.634	-7.54957	-0.288963	11.2228	-3.35339	0.00826	0.0137	-3.74237	-0.226727	9.68375	-3.14182	0.0129	0.0211	-4.1245	0	0	1	0	0	1	0	1	0
9002	23065	KIAA0090	NM_015047	1	1	19417171	19450632	19418383	19450589	1.2992	8.22186	17.2506	1.6e-10	2.42e-08	14.6443	0.356286	9.11347	0.92696	0.403	0.667375	-6.19497	-1000	-1000	-1000	-1000	-1000	-1000	-1000	-1000	-1000	-1000	-1000	-1000	-1000	-1000	-1000	-1000	-1000	-1000	-1000	0	1	0	0	1	0	0	1	0
6379	51154	C1orf33	NM_016183	1	0	19450885	19458344	19450916	19457910	2.4818	9.20248	18.6559	5.83e-11	1.28e-08	15.6487	-0.988854	10.0326	-4.33584	0.0106	0.174001	-2.40053	2323559	2.83168	9.5246	20.1963	7.44e-08	4.53e-06	9.00707	2.68972	8.81022	16.5152	3.93e-08	9.21e-07	9.37299	2.01849	10.0406	21.245	1.34e-08	1.01e-06	10.6241	1	0	0	1	0	0	1	0	0
-1	246181	AFAR3	NM_201252	1	1	19465064	19473021	19466380	19469892	-1000	-1000	-1000	-1000	-1000	-1000	0.179946	10.4351	0.680964	0.531	0.761552	-6.40258	2399743	0.84669	8.90218	3.39903	0.0102	0.0181	-3.77138	0.29827	8.04649	0.817639	0.434	0.484	-7.44445	-0.0222157	9.1923	-0.0805744	0.938	0.948	-7.76372	0	1	0	0	1	0	1	0	0
49295	22977	AKR7A3	NM_012067	1	1	19481643	19487866	19481811	19487789	0.0988468	7.55289	1.34678	0.2	0.405	-6.58689	0.151949	9.15303	0.599341	0.579	0.791174	-6.46039	2399743	0.84669	8.90218	3.39903	0.0102	0.0181	-3.77138	0.29827	8.04649	0.817639	0.434	0.484	-7.44445	-0.0222157	9.1923	-0.0805744	0.938	0.948	-7.76372	0	1	0	0	1	0	1	0	0
2737	8574	AKR7A2	NM_003689	1	1	19503050	19511226	19503305	19511204	0.295853	8.55483	2.72791	0.0169	0.0595	-4.33074	0.278044	11.349	1.19333	0.295	0.580887	-5.9252	2399743	0.84669	8.90218	3.39903	0.0102	0.0181	-3.77138	-0.126477	10.5149	-0.827478	0.429	0.479	-7.43611	-0.264336	9.79172	-2.0763	0.0699	0.0967	-5.82462	0	1	0	0	1	0	1	0	0
56784	54896	PQLC2	NM_001040125	1	0	19511326	19528379	19516758	19527723	-0.549247	6.04421	-4.71137	0.000377	0.00228	-0.504017	-1000	-1000	-1000	-1000	-1000	-1000	2323603	-0.440963	8.0061	-3.67922	0.00687	0.0128	-3.35085	-0.568299	8.13877	-3.78733	0.00416	0.00739	-3.02671	-0.54846	8.02108	-3.7362	0.00525	0.00939	-3.17934	0	0	1	0	0	1	0	0	1
56784	54896	PQLC2	NM_017765	1	0	19511326	19528379	19516758	19527723	-0.549247	6.04421	-4.71137	0.000377	0.00228	-0.504017	-1000	-1000	-1000	-1000	-1000	-1000	2323603	-0.440963	8.0061	-3.67922	0.00687	0.0128	-3.35085	-0.568299	8.13877	-3.78733	0.00416	0.00739	-3.02671	-0.54846	8.02108	-3.7362	0.00525	0.00939	-3.17934	0	0	1	0	0	1	0	0	1
56784	54896	PQLC2	NM_001040126	1	0	19511326	19528379	19523744	19527723	-0.549247	6.04421	-4.71137	0.000377	0.00228	-0.504017	-1000	-1000	-1000	-1000	-1000	-1000	2323603	-0.440963	8.0061	-3.67922	0.00687	0.0128	-3.35085	-0.568299	8.13877	-3.78733	0.00416	0.00739	-3.02671	-0.54846	8.02108	-3.7362	0.00525	0.00939	-3.17934	0	0	1	0	0	1	0	0	1
3620	832	CAPZB	NM_004930	1	1	19537859	19684578	19538610	19684518	-0.645552	11.4511	-9.00392	4.83e-07	8.5e-06	6.41828	-0.233824	11.6844	-1.02641	0.359	0.632224	-6.09891	2399765	-0.549164	12.2012	-4.95853	0.00131	0.00304	-1.55938	-0.525732	11.779	-5.06652	0.000638	0.00137	-1.03804	-0.65509	12.2611	-7.49165	5.39e-05	0.000185	1.76167	0	0	1	0	0	1	0	0	1
-1	644083	LOC644083	NM_001039773	1	0	19597959	19600294	19599131	19599610	-1000	-1000	-1000	-1000	-1000	-1000	-1000	-1000	-1000	-1000	-1000	-1000	-1000	-1000	-1000	-1000	-1000	-1000	-1000	-1000	-1000	-1000	-1000	-1000	-1000	-1000	-1000	-1000	-1000	-1000	-1000	0	1	0	0	1	0	0	1	0
55024	440574	C1orf151	NM_001032363	1	0	19796053	19827760	19796126	19825481	0.927701	11.1824	11.4599	2.72e-08	8.99e-07	9.40462	-0.008227	13.0461	-0.0337212	0.975	0.990637	-6.66901	2323774	-0.338002	5.86154	-0.505284	-1000	-1000	-1000	-0.0737518	6.02208	-0.340056	-1000	-1000	-1000	0.783955	5.7779	2.93283	-1000	-1000	-1000	0	1	0	0	1	0	0	1	0
3924	4681	NBL1	NM_182744	1	0	19842312	19857531	19842392	19856208	-0.187727	7.86956	-1.9762	0.0691	0.187	-5.66304	-0.702895	10.1078	-1.64872	0.17	0.464219	-5.39796	2323774	-0.338002	5.86154	-0.505284	-1000	-1000	-1000	-0.0737518	6.02208	-0.340056	-1000	-1000	-1000	0.783955	5.7779	2.93283	-1000	-1000	-1000	0	1	0	0	1	0	0	1	0
3924	4681	NBL1	NM_005380	1	0	19843394	19857531	19854113	19856208	-0.187727	7.86956	-1.9762	0.0691	0.187	-5.66304	-0.702895	10.1078	-1.64872	0.17	0.464219	-5.39796	2323774	-0.338002	5.86154	-0.505284	-1000	-1000	-1000	-0.0737518	6.02208	-0.340056	-1000	-1000	-1000	0.783955	5.7779	2.93283	-1000	-1000	-1000	0	1	0	0	1	0	0	1	0
673	3362	HTR6	NM_000871	1	0	19864366	19878640	19864833	19878447	-0.0962668	6.71989	-1.27842	0.223	0.435	-6.67203	0.044333	3.66681	0.082811	0.938	0.977893	-6.66554	2323790	0.0342997	6.03733	0.0527861	-1000	-1000	-1000	-0.327543	6.61483	-0.830805	-1000	-1000	-1000	0.119778	6.77394	0.241859	-1000	-1000	-1000	0	1	0	0	1	0	0	1	0
57112	255104	TMCO4	NM_181719	1	1	19881323	19998996	19882119	19979837	-0.324883	8.05156	-5.57309	8.14e-05	0.000614	1.08024	0.923292	6.72999	3.9357	0.015	0.192526	-2.77849	2399908	-0.358107	8.7332	-2.33474	0.0496	0.0729	-5.41122	-0.39318	8.83474	-3.29176	0.00912	0.015	-3.84504	-0.274695	8.4186	-1.6167	0.143	0.183	-6.49662	0	0	1	0	1	0	0	1	0
10404	54546	RNF186	NM_019062	1	1	20013109	20014357	20013497	20014180	0.00206758	6.36272	0.0271243	0.979	0.991	-7.49761	-0.277953	3.22175	-0.780782	0.476	0.723535	-6.32401	2399988	0.17024	7.58796	0.856733	0.418	0.475	-7.33343	-0.26099	7.67974	-1.99027	0.0772	0.105	-5.97953	-0.0965837	7.40491	-0.509891	0.623	0.671	-7.62434	0	1	0	0	1	0	0	1	0
8083	30814	PLA2G2E	NM_014589	1	1	20119387	20122696	20119387	20122638	-0.0153827	6.44557	-0.153072	0.881	0.943	-7.48547	0.164527	3.03977	0.245428	0.817	0.923719	-6.63338	2400009	0.127909	7.01972	0.991532	0.352	0.41	-7.20703	0.103218	6.89452	0.60432	-1000	-1000	-1000	-0.153865	7.03824	-0.736332	0.482	0.536	-7.4739	0	1	0	0	1	0	0	1	0
254	5320	PLA2G2A	NM_000300	1	1	20174517	20179495	20174780	20177852	-0.0420483	7.09985	-0.532694	0.603	0.782	-7.34757	3.845	7.34139	5.69817	0.00383	0.138392	-1.29534	2400027	-0.113877	5.88119	-0.441255	-1000	-1000	-1000	-0.0908125	5.99864	-0.364858	-1000	-1000	-1000	0.183746	5.69554	0.708344	-1000	-1000	-1000	0	1	0	0	1	0	0	1	0
716	5322	PLA2G5	NM_000929	1	0	20269287	20290979	20283910	20289771	-0.273112	4.7106	-2.94316	0.0111	0.0418	-3.92317	-0.102862	5.3585	-0.400338	0.708	0.869544	-6.57418	2323847	0.431048	5.67025	0.77744	-1000	-1000	-1000	-0.021735	5.18572	-0.0500223	-1000	-1000	-1000	-0.956133	5.72562	-2.75981	-1000	-1000	-1000	0	1	0	0	1	0	0	1	0
7892	26279	PLA2G2D	NM_012400	1	1	20311027	20318594	20313193	20318577	-0.731032	8.39939	-4.46048	0.000601	0.0034	-0.980881	-0.446185	4.82362	-1.55613	0.19	0.485746	-5.50944	2400059	-0.931708	7.97456	-6.39458	0.000267	0.000798	0.179609	-1.14564	8.6912	-8.40086	1.33e-05	5.1e-05	3.13144	-1.12386	8.74825	-6.49724	0.000152	0.000435	0.633692	0	0	1	0	0	1	0	0	1
8084	64600	PLA2G2F	NM_022819	1	0	20338405	20349458	20339258	20347480	-0.0918605	5.80411	-0.938528	0.365	0.591	-7.04102	-0.632459	5.49354	-1.0102	0.366	0.637549	-6.11497	2323882	-0.221623	6.86599	-0.808686	-1000	-1000	-1000	0.172202	6.48012	0.559434	-1000	-1000	-1000	0.72762	5.7814	1.40405	-1000	-1000	-1000	0	1	0	0	1	0	0	1	0
17568	127733	UBXD3	NM_152376	1	0	20385164	20392527	20389641	20390483	-0.0368206	6.89745	-0.416606	0.684	0.833	-7.40562	1.28109	6.53566	3.08948	0.0335	0.252267	-3.66664	2323899	0.641603	7.13288	3.91134	0.00499	0.0097	-3.00933	0.180849	7.33774	0.719035	0.49	0.539	-7.52324	-0.157615	7.39566	-0.762891	0.466	0.522	-7.45306	0	1	0	0	1	0	1	0	0
19431	127731	FLJ32784	NM_001039500	1	0	20490016	20538301	20518469	20537113	-1000	-1000	-1000	-1000	-1000	-1000	-1000	-1000	-1000	-1000	-1000	-1000	2323951	-0.192837	6.26454	-0.74662	-1000	-1000	-1000	0.0611198	6.32996	0.294098	-1000	-1000	-1000	-0.0229878	6.0434	-0.0889673	-1000	-1000	-1000	0	1	0	0	1	0	0	1	0
10238	55450	CAMK2N1	NM_018584	1	1	20681471	20685314	20682728	20684458	0.0691811	3.99192	1.14288	0.273	0.496	-6.8304	3.07564	9.07036	6.08575	0.00297	0.12954	-1.02583	2400177	0.154769	5.36357	0.457509	-1000	-1000	-1000	0.547265	7.13729	0.842856	0.421	0.471	-7.4229	-0.12408	5.08224	-0.239336	-1000	-1000	-1000	0	1	0	0	1	0	0	1	0
11576	79594	C1orf166	NM_024544	1	1	20698529	20707240	20699769	20707103	0.0245057	8.89769	0.354903	0.728	0.861	-7.43084	-0.230523	8.70866	-0.946143	0.394	0.659897	-6.17693	2400193	0.403115	9.10724	3.06063	0.0167	0.028	-4.28898	-0.180937	8.80033	-1.49898	0.167	0.208	-6.68929	-0.116491	9.37802	-1.22976	0.252	0.304	-6.99077	0	1	0	0	1	0	1	0	0
45810	163933	FAM43B	NM_207334	1	0	20751518	20754086	20752053	20753042	-0.176461	6.39855	-1.51615	0.153	0.337	-6.36181	-3.07657	5.19301	-6.21343	0.00273	0.126045	-0.940868	2324061	-0.125991	8.51964	-0.83768	0.428	0.484	-7.35009	-0.36461	8.79805	-1.75624	0.112	0.146	-6.33012	-0.42925	8.4531	-2.14353	0.0628	0.0877	-5.72114	0	1	0	0	1	0	0	1	0
1352	978	CDA	NM_001785	1	0	20788030	20817984	20788209	20817647	-0.398956	6.7248	-2.91931	0.0117	0.0435	-3.96869	-1.64855	7.36075	-6.81752	0.0019	0.121101	-0.56271	2324084	-1.04524	7.29298	-3.81142	0.00572	0.0109	-3.15554	-0.881207	7.65101	-4.38214	0.00169	0.00328	-2.07602	-1.18155	8.26555	-6.70782	0.000121	0.000358	0.882413	0	0	1	0	0	1	0	0	1
32672	65018	PINK1	NM_032409	1	0	20832534	20850589	20832628	20849770	-0.20409	6.93038	-2.20848	0.0452	0.134	-5.2713	-0.116502	9.63622	-0.380284	0.722	0.876204	-6.58336	2400212	-0.0697097	8.48642	-0.618486	0.554	0.604	-7.51838	-0.325842	7.71671	-4.69557	0.00107	0.00219	-1.59273	-0.403618	7.80273	-2.7483	0.024	0.0367	-4.75992	0	0	1	0	0	1	0	1	0
3821	1650	DDOST	NM_005216	1	1	20850846	20860623	20851458	20860480	0.334473	10.6454	4.09294	0.0012	0.00618	-1.68908	0.196958	12.0542	0.868972	0.431	0.688724	-6.24801	2400220	0.526333	11.9175	4.90813	0.00139	0.0032	-1.6256	0.350154	12.1821	3.80211	0.00406	0.00724	-3.00262	0.0626557	12.16	1.00588	0.343	0.399	-7.2338	1	0	0	0	1	0	1	0	0
5883	57576	KIF17	NM_020816	1	1	20863095	20917096	20863663	20916785	-0.0211627	6.58012	-0.23826	0.815	0.909	-7.46766	-0.248436	7.93879	-1.0655	0.343	0.619199	-6.05953	2400247	-0.3518	7.6157	-2.12818	0.0679	0.0963	-5.72481	-0.183776	7.70368	-1.22454	0.251	0.299	-7.03291	-0.284867	7.49857	-1.85245	0.0993	0.132	-6.16074	0	1	0	0	1	0	0	1	0
7774	50809	HP1BP3	NM_016287	1	1	20942214	20979619	20943876	20979519	0.940064	8.20333	9.44096	2.78e-07	5.49e-06	6.994	0.845954	11.2216	2.38473	0.0715	0.33314	-4.49332	2400322	0.48639	11.0358	2.23427	0.0578	0.0835	-5.56449	0.310667	11.4421	1.55552	0.154	0.193	-6.6131	-0.0323305	10.0707	-0.192988	0.852	0.877	-7.74658	0	1	0	0	1	0	0	1	0
2789	8672	EIF4G3	NM_003760	1	1	21005562	21375926	21006398	21201821	-0.280724	8.9731	-3.15752	0.00734	0.0293	-3.51098	-0.803508	7.66776	-2.22221	0.0861	0.355334	-4.69221	2400373	-0.47714	11.4619	-2.98314	0.0187	0.031	-4.40858	-0.358339	11.4857	-4.55241	0.00132	0.00263	-1.81186	-0.401571	10.4359	-6.12104	0.000232	0.000619	0.175349	0	0	1	0	0	1	0	0	1
1068	1889	ECE1	NM_001397	1	1	21418938	21489493	21419034	21489493	-0.535082	7.94117	-7.47323	3.95e-06	4.74e-05	4.22616	0.793865	6.87348	1.94402	0.119	0.400845	-5.03566	2400518	-1.44896	9.95373	-10.4469	9.24e-06	6.31e-05	3.8714	-1.17072	10.8432	-11.1158	1.26e-06	8.4e-06	5.67431	-1.0762	9.52629	-8.15892	2.85e-05	0.000112	2.45677	0	0	1	0	0	1	0	0	1
88936	84224	NBPF3	NM_032264	1	0	21639217	21683978	21644166	21682465	-0.519153	6.80942	-2.73538	0.0167	0.0588	-4.31673	1.15001	9.73381	3.76749	0.0174	0.202941	-2.94533	2324341	0.196223	8.36437	1.53918	0.164	0.21	-6.56505	-0.333188	9.03267	-1.86776	0.094	0.125	-6.1655	0.0500895	7.94438	0.559127	0.591	0.641	-7.59591	0	1	0	0	1	0	0	1	0
37314	249	ALPL	NM_000478	1	0	21708444	21777490	21753161	21776727	0.831237	6.03372	5.1653	0.000166	0.00113	0.341751	-1.66794	7.76329	-5.47731	0.00445	0.14111	-1.45715	2324416	3.37734	7.05398	24.8259	1.6e-08	3.17e-06	10.5498	1.8853	7.05088	8.33014	1.43e-05	5.4e-05	3.0565	1.79657	7.2541	12.1218	1.3e-06	1.31e-05	5.80454	1	0	0	1	0	0	1	0	0
2163	5909	RAP1GAP	NM_002885	1	1	21795301	21868385	21796799	21819111	0.0549723	6.6361	0.554376	0.588	0.772	-7.33522	-0.623121	5.14352	-2.37846	0.072	0.334049	-4.50095	2400655	0.360633	5.14391	1.41304	-1000	-1000	-1000	0.0561665	5.06297	0.396562	-1000	-1000	-1000	0.138844	5.11995	0.646912	-1000	-1000	-1000	0	1	0	0	1	0	0	1	0
12988	84196	USP48	NM_032236	1	1	21877380	21982274	21878496	21982036	-0.357163	9.55059	-3.2131	0.00658	0.0267	-3.40337	-0.428239	9.77694	-1.76615	0.148	0.438807	-5.25476	2400718	-0.153699	10.0039	-1.29349	0.234	0.286	-6.87534	-0.208976	10.9569	-2.70661	0.0237	0.036	-4.82272	0.0585735	10.1946	0.499826	0.63	0.678	-7.62984	0	0	1	0	1	0	0	1	0
12988	84196	USP48	NM_001032730	1	1	21926926	21982274	21927641	21982036	-0.357163	9.55059	-3.2131	0.00658	0.0267	-3.40337	-0.351761	8.87898	-1.48879	0.206	0.502794	-5.58948	2400718	-0.153699	10.0039	-1.29349	0.234	0.286	-6.87534	-0.208976	10.9569	-2.70661	0.0237	0.036	-4.82272	0.0585735	10.1946	0.499826	0.63	0.678	-7.62984	0	0	1	0	1	0	0	1	0
54811	401944	LDLRAD2	NM_001013693	1	0	22011344	22024300	22011531	22021294	-1000	-1000	-1000	-1000	-1000	-1000	-1000	-1000	-1000	-1000	-1000	-1000	2400793	0.0955167	7.11888	0.812758	0.441	0.497	-7.37141	-0.054094	7.72783	-0.579183	0.576	0.622	-7.61929	0.00713725	7.13429	0.114588	0.911	0.927	-7.76001	0	1	0	0	1	0	0	1	0
68473	3339	HSPG2	NM_005529	1	1	22021324	22136333	22022395	22136296	0.0879657	7.14367	0.820841	0.426	0.648	-7.14584	-0.050221	6.91306	-0.200606	0.85	0.939157	-6.64538	2400793	0.0955167	7.11888	0.812758	0.441	0.497	-7.37141	-0.054094	7.72783	-0.579183	0.576	0.622	-7.61929	0.00713725	7.13429	0.114588	0.911	0.927	-7.76001	0	1	0	0	1	0	0	1	0
40574	23436	ELA3B	NM_007352	1	0	22176004	22188431	22176119	22188358	-0.0419568	6.67958	-0.544585	0.595	0.777	-7.34085	-0.855585	4.5173	-3.4681	0.023	0.221554	-3.25421	2324571	-1.02667	5.76694	-3.36226	-1000	-1000	-1000	0.315694	5.44315	0.927596	-1000	-1000	-1000	0.146577	5.57698	0.489796	-1000	-1000	-1000	0	1	0	0	1	0	0	1	0
-1	10136	ELA3A	NM_005747	1	0	22200735	22211619	22200754	22211546	-0.0813825	6.79301	-0.644889	0.53	0.73	-7.27859	-0.855585	4.5173	-3.4681	0.023	0.221554	-3.25421	2324571	-1.02667	5.76694	-3.36226	-1000	-1000	-1000	0.315694	5.44315	0.927596	-1000	-1000	-1000	0.146577	5.57698	0.489796	-1000	-1000	-1000	0	1	0	0	1	0	0	1	0
101187	998	CDC42	NM_044472	1	0	22251706	22289881	22277558	22289111	-0.447498	9.92329	-6.62352	1.44e-05	0.000139	2.88015	0.798768	4.95524	2.66778	0.0522	0.297518	-4.15317	2324634	-0.094933	13.5111	-0.830337	0.432	0.488	-7.35643	-0.390772	13.2772	-3.69561	0.0048	0.0084	-3.17671	-0.291074	12.6431	-3.49658	0.00752	0.0129	-3.55691	0	0	1	0	0	1	0	1	0
101187	998	CDC42	NM_001039802	1	0	22251706	22292021	22277558	22290596	-0.447498	9.92329	-6.62352	1.44e-05	0.000139	2.88015	0.549664	11.327	2.46656	0.0652	0.322788	-4.39405	2324634	-0.094933	13.5111	-0.830337	0.432	0.488	-7.35643	-0.390772	13.2772	-3.69561	0.0048	0.0084	-3.17671	-0.291074	12.6431	-3.49658	0.00752	0.0129	-3.55691	0	0	1	0	0	1	0	1	0
101187	998	CDC42	NM_001791	1	0	22251706	22292021	22277558	22290596	-0.447498	9.92329	-6.62352	1.44e-05	0.000139	2.88015	0.549664	11.327	2.46656	0.0652	0.322788	-4.39405	2324634	-0.094933	13.5111	-0.830337	0.432	0.488	-7.35643	-0.390772	13.2772	-3.69561	0.0048	0.0084	-3.17671	-0.291074	12.6431	-3.49658	0.00752	0.0129	-3.55691	0	0	1	0	0	1	0	1	0
22529	54361	WNT4	NM_030761	1	1	22318786	22342196	22319129	22342001	-0.28855	6.57533	-2.23215	0.0433	0.129	-5.23021	2.44384	7.30963	10.8324	0.000288	0.10871	1.21004	2401018	1.0419	5.79534	1.77985	-1000	-1000	-1000	-0.823024	6.85715	-1.67177	0.128	0.164	-6.45144	-0.602557	6.74312	-1.90735	0.0912	0.123	-6.07966	0	1	0	0	1	0	0	1	0
8912	9923	ZBTB40	NM_014870	1	0	22650936	22727566	22689028	22725475	-0.147836	8.24322	-1.57794	0.138	0.313	-6.27498	1.43854	3.65625	2.82516	0.0441	0.278965	-3.96848	2324743	-0.121775	9.97704	-0.93913	0.377	0.435	-7.25791	-0.192643	9.79234	-2.79519	0.0205	0.0315	-4.67512	0.145442	8.69683	2.08525	0.0689	0.0955	-5.81089	0	0	1	0	1	0	0	1	0
22436	2046	EPHA8	NM_001006943	1	0	22762590	22788689	22762715	22788458	-0.0574327	7.13295	-0.628418	0.54	0.738	-7.2895	-2.03407	3.57634	-3.61985	0.02	0.212556	-3.09573	2324820	-0.0798527	7.98524	-0.426741	0.681	0.723	-7.62754	-0.284031	9.0641	-1.56276	0.152	0.191	-6.60323	-0.296736	8.29607	-1.9948	0.0795	0.109	-5.94861	0	1	0	0	1	0	0	1	0
22436	2046	EPHA8	NM_020526	1	0	22762590	22802673	22762715	22800820	-0.0574327	7.13295	-0.628418	0.54	0.738	-7.2895	-0.0216143	2.29306	-0.0881057	0.934	0.976328	-6.66499	2324820	-0.0798527	7.98524	-0.426741	0.681	0.723	-7.62754	-0.284031	9.0641	-1.56276	0.152	0.191	-6.60323	-0.296736	8.29607	-1.9948	0.0795	0.109	-5.94861	0	1	0	0	1	0	0	1	0
7249	712	C1QA	NM_015991	1	0	22835704	22838760	22836696	22838486	-0.0283305	6.58213	-0.328872	0.747	0.873	-7.44029	-0.647134	4.19314	-1.0531	0.348	0.622709	-6.07211	2324856	-0.156748	4.98507	-0.421367	-1000	-1000	-1000	-0.117594	5.03115	-0.39388	-1000	-1000	-1000	0.311303	4.61556	1.33428	-1000	-1000	-1000	0	1	0	0	1	0	0	1	0
32020	714	C1QC	NM_172369	1	0	22842733	22847188	22843103	22846862	0.00300409	5.78248	0.0279177	0.978	0.991	-7.49759	0.221725	2.7103	0.926685	0.403	0.667513	-6.19523	2324873	0.46326	6.47842	1.83365	-1000	-1000	-1000	0.50613	5.85484	2.1444	-1000	-1000	-1000	-0.0440137	6.35558	-0.184857	-1000	-1000	-1000	0	1	0	0	1	0	0	1	0
418	713	C1QB	NM_000491	1	0	22852268	22860614	22858536	22860465	-0.146268	5.53812	-1.21017	0.247	0.465	-6.75354	-0.247489	4.699	-1.04257	0.352	0.626142	-6.08273	2324884	1.18651	6.10078	3.62092	-1000	-1000	-1000	0.249134	5.64437	1.26277	-1000	-1000	-1000	1.1014	5.85423	3.41533	-1000	-1000	-1000	0	1	0	0	1	0	0	1	0
37925	2048	EPHB2	NM_004442	1	0	22909917	23114408	22910062	23112649	-0.205968	6.45656	-2.59893	0.0217	0.0733	-4.57083	-0.0376497	6.00969	-0.0992651	0.925	0.972918	-6.66372	2324919	-0.529769	8.68995	-3.2334	0.0129	0.0223	-4.02359	-0.823777	9.92882	-5.25673	0.000492	0.00109	-0.761044	-0.446486	8.92718	-3.34106	0.00952	0.016	-3.80468	0	0	1	0	0	1	0	0	1
37925	2048	EPHB2	NM_017449	1	0	22909917	23114408	22910062	23112649	-0.205968	6.45656	-2.59893	0.0217	0.0733	-4.57083	-0.0376497	6.00969	-0.0992651	0.925	0.972918	-6.66372	2324919	-0.529769	8.68995	-3.2334	0.0129	0.0223	-4.02359	-0.823777	9.92882	-5.25673	0.000492	0.00109	-0.761044	-0.446486	8.92718	-3.34106	0.00952	0.016	-3.80468	0	0	1	0	0	1	0	0	1
32240	23028	AOF2	NM_015013	1	0	23218532	23282770	23218676	23282443	-1.16447	6.7923	-10.0459	1.33e-07	3.03e-06	7.75743	-0.179581	9.55475	-0.488795	0.649	0.834457	-6.52859	2325002	0.830848	11.8291	6.65094	0.000207	0.000651	0.461841	0.809029	10.5353	7.58349	3.06e-05	0.000101	2.23349	0.385976	11.2283	4.62283	0.0015	0.0031	-1.84083	1	0	0	1	0	0	1	0	0
11545	7798	LUZP1	NM_033631	1	1	23284037	23367924	23287974	23293340	-0.796776	8.20337	-7.3982	4.42e-06	5.2e-05	4.11118	0.652655	7.48787	1.82245	0.138	0.426678	-5.18562	2401193	-0.478915	10.7278	-3.46701	0.00925	0.0167	-3.6686	-0.732779	10.0467	-8.99986	7.54e-06	3.23e-05	3.7466	-0.676969	9.70438	-5.75192	0.000357	0.000889	-0.292482	0	0	1	0	0	1	0	0	1
20240	3352	HTR1D	NM_000864	1	1	23390975	23393808	23392165	23393298	-0.0177705	5.72002	-0.204793	0.841	0.923	-7.47557	1.31515	4.2356	5.48241	0.00444	0.14111	-1.45334	2401251	-0.20978	5.4621	-0.462859	-1000	-1000	-1000	-0.0188952	5.06488	-0.0524409	-1000	-1000	-1000	0.695187	4.21313	1.17053	-1000	-1000	-1000	0	1	0	0	1	0	0	1	0
4251	10236	HNRPR	NM_005826	1	1	23508863	23543370	23509533	23540087	1.03818	7.25014	11.3616	3.02e-08	9.74e-07	9.29586	0.247461	12.0379	0.85702	0.437	0.692753	-6.25865	2401275	1.26559	11.9319	11.4038	4.93e-06	4.22e-05	4.55532	1.08946	11.5175	10.038	3.01e-06	1.61e-05	4.73651	0.692667	11.5455	6.96693	9.19e-05	0.000286	1.18101	1	0	0	1	0	0	1	0	0
40684	80818	ZNF436	NM_030634	1	1	23558528	23567465	23561048	23567084	0.105535	7.21227	1.07509	0.301	0.528	-6.90414	1.49938	6.74871	5.2167	0.00536	0.148398	-1.65622	2401333	-0.0236837	8.22268	-0.211868	0.838	0.864	-7.70393	-0.112088	7.78124	-1.10008	0.299	0.349	-7.17244	-0.165615	7.63132	-1.23002	0.252	0.304	-6.99047	0	1	0	0	1	0	0	1	0
-1	-1	ZNF436	NM_001077195	1	1	23558528	23568943	23561048	23567084	-1000	-1000	-1000	-1000	-1000	-1000	1.49938	6.74871	5.2167	0.00536	0.148398	-1.65622	2325113	0.285639	6.89032	1.80855	0.11	0.148	-6.19392	0.115473	7.25006	1.11678	0.293	0.342	-7.15436	-0.165615	7.63132	-1.23002	0.252	0.304	-6.99047	0	1	0	0	1	0	0	1	0
-1	148898	C1orf213	NM_138479	1	0	23568050	23570864	23568377	23568757	0.0479295	6.42126	0.516054	0.614	0.789	-7.35673	1.84482	8.08523	4.59637	0.00859	0.16415	-2.16827	2325113	0.285639	6.89032	1.80855	0.11	0.148	-6.19392	0.115473	7.25006	1.11678	0.293	0.342	-7.15436	-0.165615	7.63132	-1.23002	0.252	0.304	-6.99047	0	1	0	0	1	0	0	1	0
-1	148898	C1orf213	NM_001008896	1	0	23568050	23570864	23568377	23570601	0.0479295	6.42126	0.516054	0.614	0.789	-7.35673	1.84482	8.08523	4.59637	0.00859	0.16415	-2.16827	2325113	0.285639	6.89032	1.80855	0.11	0.148	-6.19392	0.115473	7.25006	1.11678	0.293	0.342	-7.15436	0.218287	6.59546	1.04584	-1000	-1000	-1000	0	1	0	0	1	0	0	1	0
20684	6920	TCEA3	NM_003196	1	1	23580141	23623847	23580545	23623712	0.75235	6.8952	3.09845	0.00823	0.0323	-3.62507	1.51602	4.35206	6.25161	0.00267	0.125595	-0.915813	2401347	1.09875	8.73515	10.9274	6.7e-06	5.13e-05	4.22184	0.948861	9.97462	4.29853	0.00191	0.00366	-2.20711	0.526566	10.0888	4.19483	0.00271	0.00519	-2.47436	1	0	0	1	0	0	1	0	0
41190	55616	DDEFL1	NM_017707	1	1	23627642	23683257	23628935	23683212	-0.329011	7.26633	-4.39168	0.000683	0.0038	-1.11267	0.0597653	9.61125	0.225218	0.832	0.930622	-6.63908	2401384	0.115599	6.08771	0.485649	-1000	-1000	-1000	-0.482681	7.19413	-4.04996	0.00278	0.00511	-2.60194	-0.066766	6.50152	-0.3555	-1000	-1000	-1000	0	0	1	0	1	0	0	1	0
48264	1870	E2F2	NM_004091	1	1	23705508	23730299	23708958	23729871	0.675387	8.95623	6.63355	1.42e-05	0.000137	2.89661	0.897972	8.37955	2.90937	0.0403	0.269578	-3.87113	2401448	0.776592	9.03125	5.88798	0.000454	0.00124	-0.402282	0.701391	9.3587	5.72432	0.000266	0.000636	-0.101685	0.74332	9.01668	11.0691	2.68e-06	2.11e-05	5.02409	1	0	0	1	0	0	1	0	0
1633	3399	ID3	NM_002167	1	1	23757042	23758871	23758037	23758503	0.215648	9.95798	1.37395	0.192	0.394	-6.55211	2.0336	11.9215	5.2551	0.00522	0.14698	-1.62632	2401493	-0.0839223	10.931	-0.73933	0.482	0.535	-7.43103	0.00340225	11.2176	0.0173221	0.987	0.989	-7.80151	-0.351487	12.1159	-6.21499	0.000208	0.000565	0.291522	0	1	0	0	0	1	0	1	0
37376	6135	RPL11	NM_000975	1	0	23890880	23895499	23890900	23895449	-0.060638	13.3761	-1.27061	0.226	0.438	-6.68153	-0.056925	16.3755	-0.248736	0.815	0.922916	-6.6324	2325192	0.206223	13.4393	1.6978	0.13	0.171	-6.34979	0.222644	13.3941	2.07965	0.0667	0.0918	-5.84091	-0.084813	13.7574	-1.05259	0.322	0.377	-7.18612	0	1	0	0	1	0	0	1	0
37746	6924	TCEB3	NM_003198	1	0	23942548	23958969	23942580	23958649	0.162257	8.2239	2.12688	0.0526	0.151	-5.4114	-0.579064	9.43879	-2.09194	0.1	0.376331	-4.85281	2325251	-0.19392	10.9169	-1.57163	0.157	0.201	-6.52186	-0.313958	10.1335	-2.80922	0.0201	0.0308	-4.65171	-0.396808	10.137	-4.97447	0.000939	0.00207	-1.33934	0	0	1	0	0	1	0	1	0
10678	57095	C1orf128	NM_020362	1	0	23977474	23987306	23977592	23986452	0.931692	10.0398	9.93578	1.52e-07	3.36e-06	7.62129	-0.145433	8.14825	-0.420033	0.695	0.861534	-6.56475	2325274	1.5288	10.0307	9.60057	1.68e-05	9.53e-05	3.21649	1.18667	9.67941	6.43641	0.000111	0.000296	0.844828	0.65783	10.4773	5.23725	0.000671	0.00155	-0.975986	1	0	0	1	0	0	1	0	0
100964	11313	LYPLA2	NM_007260	1	0	23990232	23994613	23991759	23993808	0.121687	9.86235	2.60777	0.0213	0.0722	-4.55449	0.714248	6.26197	2.03636	0.107	0.384545	-4.9215	2325290	0.367848	9.01395	3.1966	0.0136	0.0234	-4.07994	0.001191	9.5974	0.0110146	0.991	0.993	-7.80161	-0.102022	10.0643	-1.50641	0.169	0.213	-6.64564	0	1	0	0	1	0	1	0	0
347	2582	GALE	NM_000403	1	1	23994675	23999620	23995025	23998083	0.753043	7.87711	6.31482	2.36e-05	0.000212	2.36686	0.890588	7.46435	2.2143	0.0869	0.356199	-4.70194	2401581	0.914424	8.69793	8.96507	2.72e-05	0.000133	2.68979	0.270731	9.19592	2.53167	0.0317	0.0468	-5.11249	0.109546	9.43747	1.23001	0.252	0.304	-6.99047	1	0	0	0	1	0	1	0	0
347	2582	GALE	NM_001008216	1	1	23994675	23999880	23995025	23998083	0.753043	7.87711	6.31482	2.36e-05	0.000212	2.36686	0.890588	7.46435	2.2143	0.0869	0.356199	-4.70194	2401581	0.914424	8.69793	8.96507	2.72e-05	0.000133	2.68979	0.270731	9.19592	2.53167	0.0317	0.0468	-5.11249	0.109546	9.43747	1.23001	0.252	0.304	-6.99047	1	0	0	0	1	0	1	0	0
159	3155	HMGCL	NM_000191	1	1	24000954	24024535	24001539	24024491	-0.724868	8.71599	-10.2636	1.03e-07	2.48e-06	8.02318	0.0805383	9.08976	0.295019	0.782	0.907475	-6.61739	2401609	-0.665205	9.06121	-3.99537	0.00446	0.00878	-2.88739	-0.796585	8.50814	-5.09485	0.000613	0.00133	-0.996452	-0.991973	9.80438	-12.1818	1.25e-06	1.28e-05	5.84706	0	0	1	0	0	1	0	0	1
20078	2517	FUCA1	NM_000147	1	1	24044160	24067359	24044791	24067347	-0.610295	9.85827	-4.67383	0.000404	0.00242	-0.574973	0.303283	8.7181	0.793574	0.469	0.718171	-6.31336	2401643	-0.414516	9.98627	-4.42771	0.00253	0.00535	-2.27505	-0.83504	9.49509	-11.2613	1.13e-06	7.79e-06	5.79466	-0.979829	9.90925	-13.8065	4.57e-07	6.79e-06	6.92805	0	0	1	0	0	1	0	0	1
1389	1269	CNR2	NM_001841	1	1	24073047	24112403	24073611	24074693	-0.66704	7.37408	-5.85705	5.02e-05	0.000405	1.58163	0.192232	4.78794	0.719082	0.509	0.746898	-6.37356	4044363	-2.67565	9.60687	-13.8136	1.23e-06	1.77e-05	6.05873	-2.40023	9.61896	-10.9358	1.45e-06	9.32e-06	5.52349	-2.05884	9.36249	-13.2652	6.31e-07	8.22e-06	6.58233	0	0	1	0	0	1	0	0	1
-1	55629	PNRC2	NM_017761	1	0	24158916	24162517	24160534	24160953	-0.123534	11.028	-1.85819	0.0853	0.22	-5.85301	0.210082	10.7132	0.85603	0.437	0.692994	-6.25953	4042198	-0.136399	12.8895	-1.28026	0.238	0.29	-6.89112	0.011724	12.8817	0.149905	0.884	0.902	-7.78925	-0.180228	12.329	-2.59415	0.0307	0.0459	-5.00824	0	1	0	0	0	1	0	1	0
87811	10772	FUSIP1	NM_006625	1	1	24165525	24179407	24166739	24179331	1.84234	7.60187	16.6384	2.54e-10	3.3e-08	14.1797	-0.540336	9.15071	-2.24658	0.0837	0.351477	-4.66227	4044406	1.22103	10.6047	12.117	3.19e-06	3.17e-05	5.03046	0.887855	11.2553	12.4041	4.89e-07	4.37e-06	6.6928	0.691483	10.4877	8.33291	2.43e-05	9.97e-05	2.63057	1	0	0	1	0	0	1	0	0
87811	10772	FUSIP1	NM_054016	1	1	24168159	24179407	24170218	24179331	1.84234	7.60187	16.6384	2.54e-10	3.3e-08	14.1797	-0.392963	9.04936	-1.66593	0.166	0.460197	-5.37708	4044406	1.22103	10.6047	12.117	3.19e-06	3.17e-05	5.03046	0.887855	11.2553	12.4041	4.89e-07	4.37e-06	6.6928	0.691483	10.4877	8.33291	2.43e-05	9.97e-05	2.63057	1	0	0	1	0	0	1	0	0
19432	127294	MYOM3	NM_152372	1	1	24255121	24294079	24256440	24294061	-0.0968332	6.18498	-1.02399	0.324	0.551	-6.95722	-1.11835	3.865	-1.9647	0.116	0.396929	-5.0101	2401670	0.063592	6.24067	0.239403	-1000	-1000	-1000	-0.0330493	6.56345	-0.246039	-1000	-1000	-1000	-0.119124	6.56665	-0.693576	-1000	-1000	-1000	0	1	0	0	1	0	0	1	0
10943	58985	IL22RA1	NM_021258	1	1	24318847	24342197	24319881	24342158	-0.0417403	6.57936	-0.400619	0.695	0.84	-7.41253	-1.73097	4.13952	-6.00734	0.00312	0.131708	-1.07892	2401753	-0.0114133	5.12483	-0.0482431	-1000	-1000	-1000	0.189351	5.19115	1.10667	-1000	-1000	-1000	-0.183137	5.4045	-0.808208	-1000	-1000	-1000	0	1	0	0	1	0	0	1	0
52086	163702	IL28RA	NM_170743	1	1	24353234	24386337	24356206	24386324	-0.295373	8.05768	-2.60575	0.0214	0.0725	-4.55822	-0.547142	5.47156	-1.54292	0.193	0.488848	-5.52523	2401774	-0.327653	8.73091	-2.29171	0.053	0.0773	-5.47701	-0.658462	10.0213	-3.78219	0.00419	0.00744	-3.03511	-0.56799	8.33399	-4.73556	0.00129	0.00272	-1.67817	0	0	1	0	0	1	0	1	0
52086	163702	IL28RA	NM_173064	1	1	24353234	24386337	24356206	24386324	-0.295373	8.05768	-2.60575	0.0214	0.0725	-4.55822	-0.547142	5.47156	-1.54292	0.193	0.488848	-5.52523	2401774	-0.327653	8.73091	-2.29171	0.053	0.0773	-5.47701	-0.658462	10.0213	-3.78219	0.00419	0.00744	-3.03511	-0.56799	8.33399	-4.73556	0.00129	0.00272	-1.67817	0	0	1	0	0	1	0	1	0
52086	163702	IL28RA	NM_173065	1	1	24353234	24386337	24356903	24386324	-0.295373	8.05768	-2.60575	0.0214	0.0725	-4.55822	-0.547142	5.47156	-1.54292	0.193	0.488848	-5.52523	2401774	-0.327653	8.73091	-2.29171	0.053	0.0773	-5.47701	-0.658462	10.0213	-3.78219	0.00419	0.00744	-3.03511	-0.56799	8.33399	-4.73556	0.00129	0.00272	-1.67817	0	0	1	0	0	1	0	1	0
18864	57822	GRHL3	NM_198173	1	0	24518467	24554393	24518628	24553564	-0.0459582	6.07763	-0.415207	0.685	0.834	-7.40623	5.28864	7.74556	19.1451	2.64e-05	0.0936517	2.842	2325358	-0.22345	6.24704	-0.988442	-1000	-1000	-1000	0.112582	5.57282	0.4822	-1000	-1000	-1000	0.295125	5.73266	1.33356	-1000	-1000	-1000	0	1	0	0	1	0	0	1	0
18864	57822	GRHL3	NM_021180	1	0	24522116	24554393	24522162	24553564	-0.0459582	6.07763	-0.415207	0.685	0.834	-7.40623	5.28864	7.74556	19.1451	2.64e-05	0.0936517	2.842	2325358	-0.22345	6.24704	-0.988442	-1000	-1000	-1000	0.112582	5.57282	0.4822	-1000	-1000	-1000	0.295125	5.73266	1.33356	-1000	-1000	-1000	0	1	0	0	1	0	0	1	0
18864	57822	GRHL3	NM_198174	1	0	24522116	24554393	24535571	24553564	-0.0459582	6.07763	-0.415207	0.685	0.834	-7.40623	5.28864	7.74556	19.1451	2.64e-05	0.0936517	2.842	2325358	-0.22345	6.24704	-0.988442	-1000	-1000	-1000	0.112582	5.57282	0.4822	-1000	-1000	-1000	0.295125	5.73266	1.33356	-1000	-1000	-1000	0	1	0	0	1	0	0	1	0
12705	90529	C1orf201	NM_178122	1	1	24556076	24600535	24557619	24600442	-0.467399	6.60455	-4.72886	0.000366	0.00221	-0.471015	0.505665	7.46988	1.69995	0.16	0.452167	-5.3357	-1000	-1000	-1000	-1000	-1000	-1000	-1000	-1000	-1000	-1000	-1000	-1000	-1000	-1000	-1000	-1000	-1000	-1000	-1000	0	1	0	0	1	0	0	1	0
10722	57185	NPAL3	NM_020448	1	0	24614904	24671984	24618624	24668261	-0.693119	6.93889	-8.81915	6.13e-07	1.03e-05	6.16852	1.9491	4.36431	7.78382	0.00112	0.11013	-0.0306393	2325410	-0.645639	8.60815	-6.07996	0.00037	0.00105	-0.177891	-0.734932	8.05687	-5.30374	0.000462	0.00103	-0.693376	-0.351529	7.99207	-3.58886	0.00654	0.0114	-3.41085	0	0	1	0	0	1	0	0	1
8388	11123	DSCR1L2	NM_013441	1	0	24701973	24735011	24713449	24734353	-0.188824	5.20357	-2.37892	0.0329	0.103	-4.97112	0.939861	7.80454	3.38837	0.0249	0.227407	-3.33904	2325479	-0.932029	5.32553	-2.68957	-1000	-1000	-1000	-0.36765	4.69693	-2.0046	-1000	-1000	-1000	-0.604939	5.17103	-2.40633	-1000	-1000	-1000	0	1	0	0	1	0	0	1	0
27072	400746	C1orf130	NM_001010980	1	0	24755188	24808402	24794508	24804824	-1000	-1000	-1000	-1000	-1000	-1000	-1000	-1000	-1000	-1000	-1000	-1000	-1000	-1000	-1000	-1000	-1000	-1000	-1000	-1000	-1000	-1000	-1000	-1000	-1000	-1000	-1000	-1000	-1000	-1000	-1000	0	1	0	0	1	0	0	1	0
21187	10250	SRRM1	NM_005839	1	0	24842180	24872357	24842404	24871363	0.432206	9.37786	5.32627	0.000125	0.000883	0.635803	0.408614	8.30432	1.7783	0.145	0.436438	-5.23987	2325526	0.432643	11.3094	2.01731	0.0804	0.112	-5.89023	0.236761	11.7457	2.36347	0.0419	0.0602	-5.38784	0.319232	10.7857	4.73853	0.00128	0.00272	-1.6739	0	1	0	1	0	0	0	1	0
8490	25932	CLIC4	NM_013943	1	0	24944434	25043344	24944631	25040014	0.397058	7.66049	2.68619	0.0183	0.0637	-4.40879	0.695716	10.756	2.51246	0.0619	0.317285	-4.33868	2325593	0.0267773	11.4399	0.285401	0.783	0.816	-7.68344	-0.274616	10.4339	-2.34978	0.0428	0.0614	-5.41005	-0.310098	10.9803	-2.98159	0.0166	0.0263	-4.383	0	1	0	0	0	1	0	1	0
37914	864	RUNX3	NM_004350	1	1	25098589	25129356	25101199	25128945	-0.733668	10.1484	-2.35893	0.0342	0.107	-5.0068	1.2363	5.27725	1.10942	0.326	0.605457	-6.01429	2401994	-0.751366	9.8016	-5.06703	0.00115	0.00273	-1.41807	-0.469029	10.2501	-5.35514	0.000431	0.000971	-0.61974	-0.325291	9.25707	-3.71988	0.00538	0.00961	-3.20487	0	0	1	0	0	1	0	0	1
37914	864	RUNX3	NM_001031680	1	1	25098589	25164087	25101199	25163648	-0.733668	10.1484	-2.35893	0.0342	0.107	-5.0068	1.2363	5.27725	1.10942	0.326	0.605457	-6.01429	2401994	-0.751366	9.8016	-5.06703	0.00115	0.00273	-1.41807	-0.469029	10.2501	-5.35514	0.000431	0.000971	-0.61974	-0.325291	9.25707	-3.71988	0.00538	0.00961	-3.20487	0	0	1	0	0	1	0	0	1
5993	25949	SYF2	NM_015484	1	1	25421355	25431599	25422343	25431544	-0.564842	9.36371	-9.69691	2.03e-07	4.24e-06	7.32164	0.460697	10.9004	1.85028	0.133	0.420987	-5.15135	2402068	-0.765971	9.77952	-5.05427	0.00117	0.00276	-1.4346	-0.385144	10.1385	-3.77402	0.00425	0.00753	-3.04843	-0.714109	11.3467	-9.25031	1.09e-05	5.57e-05	3.50036	0	0	1	0	0	1	0	0	1
5993	25949	SYF2	NM_207170	1	1	25421355	25431599	25422343	25431544	-0.564842	9.36371	-9.69691	2.03e-07	4.24e-06	7.32164	0.460697	10.9004	1.85028	0.133	0.420987	-5.15135	2402068	-0.765971	9.77952	-5.05427	0.00117	0.00276	-1.4346	-0.385144	10.1385	-3.77402	0.00425	0.00753	-3.04843	-0.714109	11.3467	-9.25031	1.09e-05	5.57e-05	3.50036	0	0	1	0	0	1	0	0	1
10660	57035	C1orf63	NM_020317	1	1	25441327	25446571	25441666	25446040	-1.33541	9.85009	-12.9573	5.98e-09	2.92e-07	10.966	0.556117	8.69695	1.06772	0.342	0.61849	-6.05727	2402111	-1.37131	11.2386	-9.94095	1.31e-05	8.02e-05	3.48596	-1.15642	12.7764	-14.2471	1.45e-07	1.96e-06	7.98832	-1.0896	10.0795	-11.3153	2.25e-06	1.85e-05	5.21258	0	0	1	0	0	1	0	0	1
7918	6007	RHD	NM_016124	1	0	25471567	25529521	25471625	25528001	-0.21907	7.03582	-2.29453	0.0385	0.118	-5.12096	-2.16846	2.54168	-8.2406	0.000886	0.10958	0.193693	2325877	-0.028901	6.50645	-0.118479	-1000	-1000	-1000	-0.258877	7.04131	-2.95246	0.0158	0.0249	-4.41226	-0.356043	6.71085	-1.99488	-1000	-1000	-1000	0	0	1	0	1	0	0	1	0
4469	23585	TMEM50A	NM_014313	1	0	25537397	25561436	25539564	25559782	-0.414465	9.30707	-5.16879	0.000165	0.00112	0.34816	0.532964	12.7517	1.72794	0.154	0.446831	-5.30153	2325781	-0.246861	12.0353	-2.15792	0.0649	0.0925	-5.68005	-0.241428	12.1442	-2.43622	0.0371	0.054	-5.26923	-0.420355	11.9718	-6.8127	0.000108	0.000327	1.00426	0	1	0	0	0	1	0	1	0
-1	6006	RHCE	NM_020485	1	1	25561327	25619949	25561604	25619863	-0.21907	7.03582	-2.29453	0.0385	0.118	-5.12096	-0.0950853	4.26764	-0.216518	0.839	0.934147	-6.64139	2325877	-0.028901	6.50645	-0.118479	-1000	-1000	-1000	-0.258877	7.04131	-2.95246	0.0158	0.0249	-4.41226	-0.356043	6.71085	-1.99488	-1000	-1000	-1000	0	0	1	0	1	0	0	1	0
-1	6006	RHCE	NM_138616	1	1	25561327	25619949	25561604	25619863	-0.21907	7.03582	-2.29453	0.0385	0.118	-5.12096	-0.0950853	4.26764	-0.216518	0.839	0.934147	-6.64139	-1000	-1000	-1000	-1000	-1000	-1000	-1000	-1000	-1000	-1000	-1000	-1000	-1000	-1000	-1000	-1000	-1000	-1000	-1000	0	1	0	0	1	0	0	1	0
-1	6006	RHCE	NM_138618	1	1	25561327	25619949	25569572	25619863	-0.21907	7.03582	-2.29453	0.0385	0.118	-5.12096	-0.0950853	4.26764	-0.216518	0.839	0.934147	-6.64139	2325877	-0.028901	6.50645	-0.118479	-1000	-1000	-1000	-0.258877	7.04131	-2.95246	0.0158	0.0249	-4.41226	-0.356043	6.71085	-1.99488	-1000	-1000	-1000	0	0	1	0	1	0	0	1	0
-1	6006	RHCE	NM_138617	1	1	25561327	25619949	25569572	25619863	-0.21907	7.03582	-2.29453	0.0385	0.118	-5.12096	-0.0950853	4.26764	-0.216518	0.839	0.934147	-6.64139	-1000	-1000	-1000	-1000	-1000	-1000	-1000	-1000	-1000	-1000	-1000	-1000	-1000	-1000	-1000	-1000	-1000	-1000	-1000	0	1	0	0	1	0	0	1	0
14449	55219	TMEM57	NM_018202	1	0	25630005	25698514	25630176	25697543	0.347225	8.98149	4.43077	0.000635	0.00356	-1.03775	-0.169984	8.44101	-0.705914	0.517	0.752433	-6.38373	-1000	-1000	-1000	-1000	-1000	-1000	-1000	-1000	-1000	-1000	-1000	-1000	-1000	-1000	-1000	-1000	-1000	-1000	-1000	0	1	0	0	1	0	0	1	0
9219	26119	LDLRAP1	NM_015627	1	0	25742752	25767961	25742776	25766069	-0.418167	8.44089	-1.58324	0.137	0.311	-6.26742	0.677778	6.85799	1.32063	0.253	0.547641	-5.7842	2326018	-0.238759	10.4717	-1.61063	0.148	0.191	-6.46935	-0.148279	11.3729	-1.48721	0.171	0.212	-6.70493	-0.270031	10.5998	-2.31182	0.0481	0.0689	-5.4582	0	1	0	0	1	0	0	1	0
69303	57134	MAN1C1	NM_020379	1	0	25816545	25983521	25816875	25982866	0.132672	4.73075	2.29748	0.0383	0.117	-5.11575	1.22992	10.7428	2.17754	0.0906	0.361876	-4.7472	2326049	-0.247063	7.03065	-1.62482	0.145	0.188	-6.45008	-0.417688	7.09948	-2.75825	0.0218	0.0333	-4.73673	-0.260142	6.67034	-1.36571	-1000	-1000	-1000	0	0	1	0	1	0	0	1	0
10723	57190	SEPN1	NM_020451	1	0	25999253	26017299	25999308	26014795	-0.0707783	7.44038	-0.920062	0.374	0.6	-7.05828	0.400436	8.89235	1.64868	0.17	0.464219	-5.39801	2326126	-0.222622	10.0692	-1.61717	0.147	0.19	-6.46049	-0.294864	10.4991	-2.43327	0.0373	0.0542	-5.27405	-0.715561	9.96266	-4.7724	0.00123	0.00261	-1.62538	0	1	0	0	0	1	0	1	0
10723	57190	SEPN1	NM_206926	1	0	25999253	26017299	25999308	26014795	-0.0707783	7.44038	-0.920062	0.374	0.6	-7.05828	0.400436	8.89235	1.64868	0.17	0.464219	-5.39801	2326126	-0.222622	10.0692	-1.61717	0.147	0.19	-6.46049	-0.294864	10.4991	-2.43327	0.0373	0.0542	-5.27405	-0.715561	9.96266	-4.7724	0.00123	0.00261	-1.62538	0	1	0	0	0	1	0	1	0
10472	56181	FAM54B	NM_019557	1	0	26019270	26032013	26022182	26031103	-0.756289	7.67989	-8.29156	1.24e-06	1.82e-05	5.43351	0.487997	8.91393	2.04031	0.106	0.384133	-4.91662	2326157	-0.304378	9.52009	-2.74552	0.0266	0.0423	-4.77667	-0.803033	10.2159	-6.65771	8.52e-05	0.000238	1.12535	-0.752652	9.64448	-9.28498	1.06e-05	5.46e-05	3.53178	0	0	1	0	0	1	0	0	1
81895	79000	C1orf135	NM_024037	1	1	26033083	26058434	26034070	26058434	1.01364	6.993	13.2577	4.49e-09	2.39e-07	11.2593	-0.0665987	9.43407	-0.206457	0.846	0.937291	-6.64395	-1000	-1000	-1000	-1000	-1000	-1000	-1000	-1000	-1000	-1000	-1000	-1000	-1000	-1000	-1000	-1000	-1000	-1000	-1000	0	1	0	0	1	0	0	1	0
12420	164091	PAQR7	NM_178422	1	1	26060562	26070330	26061876	26062916	-0.52981	6.66647	-6.97147	8.38e-06	8.84e-05	3.44306	0.785537	6.41176	1.45785	0.214	0.511763	-5.6259	2402431	-0.826459	7.9876	-5.75853	0.000522	0.00139	-0.556336	-1.16319	8.00578	-7.35045	3.92e-05	0.000124	1.96411	-2.04774	9.25418	-12.9359	7.72e-07	9.35e-06	6.36517	0	0	1	0	0	1	0	0	1
-1	149421	C1orf215	NM_152497	1	1	26083258	26091684	26083771	26084391	-1000	-1000	-1000	-1000	-1000	-1000	0.316408	5.2381	1.16706	0.304	0.588096	-5.95345	-1000	-1000	-1000	-1000	-1000	-1000	-1000	-1000	-1000	-1000	-1000	-1000	-1000	-1000	-1000	-1000	-1000	-1000	-1000	0	1	0	0	1	0	0	1	0
4063	3925	STMN1	NM_203401	1	1	26099194	26105230	26100093	26103753	0.903653	9.62764	7.75711	2.62e-06	3.37e-05	4.65459	-0.344836	14.579	-1.28276	0.265	0.556887	-5.8268	2402459	1.46936	10.5633	7.31376	0.00011	0.000392	1.15599	1.54028	9.19737	8.12318	1.75e-05	6.36e-05	2.83428	0.406757	11.6786	2.9125	0.0185	0.029	-4.49463	1	0	0	1	0	0	1	0	0
4063	3925	STMN1	NM_005563	1	1	26099194	26105579	26100093	26103753	0.903653	9.62764	7.75711	2.62e-06	3.37e-05	4.65459	-0.344836	14.579	-1.28276	0.265	0.556887	-5.8268	2402459	1.46936	10.5633	7.31376	0.00011	0.000392	1.15599	1.54028	9.19737	8.12318	1.75e-05	6.36e-05	2.83428	0.406757	11.6786	2.9125	0.0185	0.029	-4.49463	1	0	0	1	0	0	1	0	0
4063	3925	STMN1	NM_203399	1	1	26099194	26105954	26100093	26103753	0.903653	9.62764	7.75711	2.62e-06	3.37e-05	4.65459	-0.344836	14.579	-1.28276	0.265	0.556887	-5.8268	2402459	1.46936	10.5633	7.31376	0.00011	0.000392	1.15599	1.54028	9.19737	8.12318	1.75e-05	6.36e-05	2.83428	0.406757	11.6786	2.9125	0.0185	0.029	-4.49463	1	0	0	1	0	0	1	0	0
37309	5051	PAFAH2	NM_000437	1	1	26159901	26197234	26161066	26189893	-0.227332	5.55845	-2.6617	0.0192	0.0662	-4.45443	1.23079	5.97302	3.01857	0.036	0.258852	-3.74654	2402493	-0.524384	9.37756	-4.21012	0.00335	0.00685	-2.58001	-0.847738	8.76058	-7.62291	2.93e-05	9.74e-05	2.27846	-0.762547	8.56238	-10.1512	5.29e-06	3.3e-05	4.2855	0	0	1	0	0	1	0	0	1
3277	2134	EXTL1	NM_004455	1	0	26220857	26235538	26221724	26234424	0.00724705	6.01967	0.0794405	0.938	0.971	-7.49463	-0.140635	5.65895	-0.619147	0.567	0.784	-6.44692	2326237	-0.199587	6.60219	-0.708508	-1000	-1000	-1000	-0.0774143	6.50165	-0.359498	-1000	-1000	-1000	0.38941	6.27872	1.81548	-1000	-1000	-1000	0	1	0	0	1	0	0	1	0
40855	7780	SLC30A2	NM_001004434	1	1	26237100	26245190	26238237	26244973	-0.109235	6.9628	-0.809771	0.432	0.653	-7.15505	0.972907	7.41004	1.99127	0.113	0.392071	-4.97726	2402517	0.377845	5.15674	0.92438	-1000	-1000	-1000	-0.116826	5.09674	-0.601218	-1000	-1000	-1000	-0.687879	5.59096	-2.61036	-1000	-1000	-1000	0	1	0	0	1	0	0	1	0
40855	7780	SLC30A2	NM_032513	1	1	26237100	26245190	26238237	26244973	-0.109235	6.9628	-0.809771	0.432	0.653	-7.15505	0.972907	7.41004	1.99127	0.113	0.392071	-4.97726	2402517	0.377845	5.15674	0.92438	-1000	-1000	-1000	-0.116826	5.09674	-0.601218	-1000	-1000	-1000	-0.687879	5.59096	-2.61036	-1000	-1000	-1000	0	1	0	0	1	0	0	1	0
41878	84676	TRIM63	NM_032588	1	1	26250384	26266707	26250950	26266571	-0.0508742	5.1188	-0.54232	0.597	0.778	-7.34214	3.22317	5.81294	4.46972	0.00952	0.168217	-2.27986	2402536	0.100765	5.4963	0.280416	-1000	-1000	-1000	-0.264659	5.32993	-1.22138	-1000	-1000	-1000	-0.298594	5.55833	-1.26087	-1000	-1000	-1000	0	1	0	0	1	0	0	1	0
36977	149420	PDIK1L	NM_152835	1	0	26310917	26324621	26313386	26321654	0.382987	5.92612	5.46051	9.89e-05	0.000723	0.878501	1.08052	6.50608	2.44937	0.0665	0.325695	-4.41485	2326286	0.440301	9.54557	2.56984	0.0347	0.0533	-5.04896	0.551042	8.64451	4.81422	0.000906	0.00188	-1.41324	0.257005	8.73179	2.85184	0.0204	0.0316	-4.59266	1	0	0	1	0	0	0	1	0
67184	79927	GRRP1	NM_024869	1	0	26358097	26361704	26360369	26361184	-0.0236392	5.60416	-0.269069	0.792	0.897	-7.45932	-0.579771	7.13228	-1.89068	0.127	0.412357	-5.10153	2326295	0.542436	6.41892	1.80292	-1000	-1000	-1000	-0.412861	7.74978	-1.94438	0.0831	0.112	-6.04978	0.136828	6.48581	0.771359	-1000	-1000	-1000	0	1	0	0	1	0	0	1	0
41070	51042	ZNF593	NM_015871	1	0	26369016	26369946	26369115	26369793	1.55215	8.77349	20.5744	1.64e-11	6.37e-09	16.8958	-0.677818	10.973	-2.31545	0.0773	0.341347	-4.57785	2326311	2.19071	7.54989	13.2463	1.67e-06	2.1e-05	5.72961	2.19362	6.45218	6.92785	6.26e-05	0.000184	1.45938	1.07145	9.36972	6.24219	0.000202	0.00055	0.32495	1	0	0	1	0	0	1	0	0
4604	10256	CNKSR1	NM_006314	1	0	26376589	26388959	26376625	26388625	0.0540534	6.2864	0.574751	0.575	0.763	-7.32318	-0.635909	5.52181	-1.42226	0.224	0.521147	-5.66749	2326327	-0.0320303	6.05577	-0.124585	-1000	-1000	-1000	0.232401	6.78242	1.5815	-1000	-1000	-1000	0.0888233	6.1617	0.398991	-1000	-1000	-1000	0	1	0	0	1	0	0	1	0
18638	378807	CATSPER4	NM_198137	1	0	26389705	26401618	26389705	26401618	-1000	-1000	-1000	-1000	-1000	-1000	-0.954675	2.40124	-2.32088	0.0769	0.34061	-4.5712	-1000	-1000	-1000	-1000	-1000	-1000	-1000	-1000	-1000	-1000	-1000	-1000	-1000	-1000	-1000	-1000	-1000	-1000	-1000	0	1	0	0	1	0	0	1	0
11254	64793	CCDC21	NM_022778	1	0	26433279	26477885	26438861	26476370	0.792649	7.93798	9.91061	1.57e-07	3.45e-06	7.58998	-0.200702	8.16454	-0.542	0.615	0.815005	-6.49726	2326410	1.22741	9.38197	11.9822	3.45e-06	3.34e-05	4.94272	1.17247	9.28628	7.01626	5.66e-05	0.000169	1.56673	0.937225	8.20362	6.86121	0.000103	0.000314	1.06015	1	0	0	1	0	0	1	0	0
41824	83442	SH3BGRL3	NM_031286	1	0	26478799	26480598	26479233	26480200	-1.36747	9.90525	-15.2812	7.51e-10	6.72e-08	13.0845	0.147406	10.3073	0.658876	0.544	0.770251	-6.41882	2326448	-1.30283	10.3616	-12.566	2.45e-06	2.66e-05	5.31581	-1.09096	8.17956	-9.46344	4.95e-06	2.35e-05	4.19998	-1.60147	10.8904	-10.3492	4.55e-06	2.97e-05	4.44975	0	0	1	0	0	1	0	0	1
12159	91544	UBXD5	NM_001077262	1	1	26481361	26505781	26481376	26501960	0.346134	8.30213	3.12046	0.00789	0.0311	-3.5826	0.414859	5.77264	1.68272	0.163	0.455863	-5.35668	2402601	0.83009	8.23908	7.01382	0.000145	0.000491	0.84803	0.776294	10.0644	6.63924	8.71e-05	0.000242	1.10217	0.612247	8.71343	7.62465	4.73e-05	0.000167	1.90397	1	0	0	1	0	0	1	0	0
-1	-1	UBXD5	NM_183008	1	1	26481361	26505781	26481376	26501960	-1000	-1000	-1000	-1000	-1000	-1000	0.414859	5.77264	1.68272	0.163	0.455863	-5.35668	2402601	0.83009	8.23908	7.01382	0.000145	0.000491	0.84803	0.776294	10.0644	6.63924	8.71e-05	0.000242	1.10217	0.612247	8.71343	7.62465	4.73e-05	0.000167	1.90397	1	0	0	1	0	0	1	0	0
12159	91544	UBXD5	NM_145345	1	1	26481361	26517342	26481376	26501960	0.346134	8.30213	3.12046	0.00789	0.0311	-3.5826	0.414859	5.77264	1.68272	0.163	0.455863	-5.35668	2402601	0.83009	8.23908	7.01382	0.000145	0.000491	0.84803	0.776294	10.0644	6.63924	8.71e-05	0.000242	1.10217	0.612247	8.71343	7.62465	4.73e-05	0.000167	1.90397	1	0	0	1	0	0	1	0	0
88652	1043	CD52	NM_001803	1	0	26516997	26519599	26517095	26519379	-1.54904	11.6611	-5.13577	0.000175	0.00118	0.28747	-1.94527	6.57969	-3.17831	0.0306	0.244935	-3.56773	2326463	-1.16139	11.8245	-6.86059	0.000168	0.00055	0.686811	-1.46807	11.1653	-11.3193	1.08e-06	7.6e-06	5.84219	-0.735765	12.9274	-8.63158	1.86e-05	8.15e-05	2.92213	0	0	1	0	0	1	0	0	1
-1	644849	FLJ38020	NM_001039775	1	1	26520936	26542928	26521045	26541899	-1000	-1000	-1000	-1000	-1000	-1000	1.51855	6.79749	4.85762	0.00701	0.156694	-1.94581	2402645	-0.228538	7.33486	-1.86688	0.101	0.137	-6.11024	-0.0854375	6.69293	-0.438519	-1000	-1000	-1000	-0.467519	7.57305	-4.15988	0.00284	0.00543	-2.52717	0	1	0	0	0	1	0	1	0
-1	55057	AIM1L	NM_017977	1	1	26520958	26553207	26521294	26545734	0.0151594	5.06635	0.220279	0.829	0.917	-7.47206	1.32782	9.78536	2.88156	0.0415	0.272426	-3.90316	-1000	-1000	-1000	-1000	-1000	-1000	-1000	-1000	-1000	-1000	-1000	-1000	-1000	-1000	-1000	-1000	-1000	-1000	-1000	0	1	0	0	1	0	0	1	0
52141	257101	ZNF683	NM_173574	1	1	26560712	26571852	26560728	26567603	1.78e-05	7.2558	0.000170249	1	1	-7.49801	-1.16004	3.08989	-2.85161	0.0429	0.27567	-3.93778	2402691	-0.281379	6.43839	-0.848569	-1000	-1000	-1000	-0.0934872	6.47755	-0.58903	-1000	-1000	-1000	0.0347358	6.21187	0.110224	-1000	-1000	-1000	0	1	0	0	1	0	0	1	0
32592	79727	LIN28	NM_024674	1	0	26609855	26628804	26609969	26625535	-0.0189403	5.17821	-0.247375	0.808	0.906	-7.4653	-0.997935	8.8698	-4.2003	0.0119	0.179653	-2.52562	2326485	0.00852867	6.77692	0.0326521	-1000	-1000	-1000	-0.0962925	6.69807	-0.436233	-1000	-1000	-1000	-0.358123	6.49749	-1.66319	-1000	-1000	-1000	0	1	0	0	1	0	0	1	0
32615	79947	DHDDS	NM_024887	1	0	26631388	26670379	26632023	26668208	0.268352	8.20495	3.39598	0.00461	0.0197	-3.04785	0.462586	7.72371	1.2263	0.283	0.572529	-5.8893	2326496	0.261951	9.97304	2.10335	0.0706	0.0995	-5.76205	-0.191019	9.18611	-1.98999	0.0772	0.105	-5.97997	-0.10183	9.29678	-1.1402	0.286	0.34	-7.0923	0	1	0	0	1	0	0	1	0
32615	79947	DHDDS	NM_205861	1	0	26631388	26670379	26632023	26668208	0.268352	8.20495	3.39598	0.00461	0.0197	-3.04785	0.462586	7.72371	1.2263	0.283	0.572529	-5.8893	2326496	0.261951	9.97304	2.10335	0.0706	0.0995	-5.76205	-0.191019	9.18611	-1.98999	0.0772	0.105	-5.97997	-0.10183	9.29678	-1.1402	0.286	0.34	-7.0923	0	1	0	0	1	0	0	1	0
88722	3151	HMGN2	NM_005517	1	0	26671500	26675047	26671690	26674225	0.123516	12.8654	1.86295	0.0846	0.218	-5.84547	-0.481767	13.3068	-1.3652	0.24	0.536202	-5.73341	2326531	0.529346	12.0373	4.44669	0.00247	0.00525	-2.24877	0.436098	11.1589	5.98825	0.000191	0.000474	0.257097	-0.0106495	12.4999	-0.1871	0.856	0.88	-7.74783	1	0	0	0	1	0	1	0	0
55703	6195	RPS6KA1	NM_002953	1	0	26728835	26774106	26728998	26773278	-0.252881	9.44667	-1.87328	0.0831	0.215	-5.8291	0.568349	9.46912	1.03287	0.357	0.629995	-6.09245	2326561	-0.557468	9.69041	-3.48328	0.00904	0.0163	-3.64405	-0.690349	10.812	-7.11653	5.07e-05	0.000153	1.68736	-0.74078	10.2999	-10.0481	5.74e-06	3.48e-05	4.19881	0	0	1	0	0	1	0	0	1
55703	6195	RPS6KA1	NM_001006665	1	0	26744929	26774106	26744978	26773278	-0.252881	9.44667	-1.87328	0.0831	0.215	-5.8291	0.568349	9.46912	1.03287	0.357	0.629995	-6.09245	2326561	-0.557468	9.69041	-3.48328	0.00904	0.0163	-3.64405	-0.690349	10.812	-7.11653	5.07e-05	0.000153	1.68736	-0.74078	10.2999	-10.0481	5.74e-06	3.48e-05	4.19881	0	0	1	0	0	1	0	0	1
21216	8289	ARID1A	NM_139135	1	0	26895108	26981187	26895481	26979833	-0.24042	10.7139	-2.62111	0.0207	0.0707	-4.5298	0.0566537	8.16258	0.198659	0.852	0.940055	-6.64585	2326640	-0.451044	10.3138	-2.64806	0.0308	0.048	-4.92781	-0.268276	11.5473	-2.69568	0.0242	0.0366	-4.84089	-0.253368	10.1128	-3.86949	0.00432	0.00786	-2.9719	0	0	1	0	0	1	0	0	1
21216	8289	ARID1A	NM_006015	1	0	26895108	26981187	26895481	26979833	-0.24042	10.7139	-2.62111	0.0207	0.0707	-4.5298	-0.0975027	10.7412	-0.287533	0.787	0.909585	-6.61998	2326640	-0.451044	10.3138	-2.64806	0.0308	0.048	-4.92781	-0.268276	11.5473	-2.69568	0.0242	0.0366	-4.84089	-0.253368	10.1128	-3.86949	0.00432	0.00786	-2.9719	0	0	1	0	0	1	0	0	1
5354	55650	PIGV	NM_017837	1	0	26987072	26997472	26989893	26996921	-0.527409	8.57802	-5.61283	7.6e-05	0.000579	1.15106	0.4382	7.63542	1.6358	0.173	0.466871	-5.4136	2326707	-0.575828	9.3134	-4.7949	0.0016	0.0036	-1.77569	-0.658497	9.1145	-7.75228	2.56e-05	8.72e-05	2.42479	-0.641666	9.34338	-7.65527	4.59e-05	0.000163	1.93646	0	0	1	0	0	1	0	0	1
110918	84243	ZDHHC18	NM_032283	1	0	27025787	27054793	27025882	27052920	-0.301905	6.7743	-2.43449	0.0296	0.0948	-4.87125	0.0273893	9.49391	0.102137	0.923	0.972175	-6.66337	2326749	-0.118171	9.94434	-0.931771	0.38	0.439	-7.26488	-0.48507	10.0333	-3.29072	0.00914	0.015	-3.84677	-0.396265	10.0119	-4.33827	0.00221	0.00436	-2.25928	0	0	1	0	0	1	0	1	0
4475	2810	SFN	NM_006142	1	0	27062219	27063533	27062290	27063036	-0.237592	10.0079	-1.94085	0.0737	0.196	-5.72063	0.0874223	9.39916	0.151238	0.887	0.956303	-6.65585	2326774	0.387425	7.51505	3.01343	0.0179	0.0298	-4.36179	0.22961	8.06733	1.69419	0.124	0.159	-6.41954	0.686275	7.39798	2.56532	0.0321	0.0479	-5.05454	0	1	0	1	0	0	1	0	0
7006	54707	ATPBD1B	NM_018066	1	1	27078459	27089455	27078754	27089173	0.35351	8.09986	2.87416	0.0127	0.0469	-4.05463	-0.345449	9.58144	-1.5308	0.196	0.491724	-5.53967	2402838	0.095342	9.56504	0.756141	0.472	0.527	-7.41781	0.18835	9.5021	2.02926	0.0724	0.0989	-5.91934	-0.104622	9.96802	-1.0979	0.303	0.358	-7.1383	0	1	0	0	1	0	0	1	0
11122	63906	GPATC3	NM_022078	1	1	27089566	27099543	27090087	27099519	0.0511292	7.9417	0.642449	0.531	0.731	-7.28023	-0.349186	8.64888	-1.44459	0.218	0.515253	-5.64144	2402861	0.294795	7.57347	1.74618	0.121	0.161	-6.28221	0.013006	8.15716	0.122785	0.905	0.92	-7.79334	-0.146384	9.218	-1.17708	0.271	0.325	-7.05115	0	1	0	0	1	0	0	1	0
8030	8431	NR0B2	NM_021969	1	1	27110565	27113046	27110922	27113017	-0.0446596	7.35818	-0.543784	0.596	0.777	-7.34131	-1.42949	3.22213	-2.88883	0.0412	0.271601	-3.89477	2402883	0.02829	6.15779	0.0466419	-1000	-1000	-1000	-0.664608	5.48683	-2.69371	-1000	-1000	-1000	-0.115709	5.35215	-0.258037	-1000	-1000	-1000	0	1	0	0	1	0	0	1	0
4812	10726	NUDC	NM_006600	1	0	27120810	27145473	27120926	27145258	1.32605	10.0904	12.0922	1.41e-08	5.39e-07	10.085	-0.784548	11.6789	-3.39124	0.0248	0.227407	-3.33597	2326799	1.4638	9.79733	11.3774	5.02e-06	4.27e-05	4.5372	1.44474	11.0834	10.2452	2.53e-06	1.41e-05	4.92345	0.754073	11.3156	8.80907	1.59e-05	7.25e-05	3.09147	1	0	0	1	0	0	1	0	0
17563	126695	C1orf172	NM_152365	1	1	27148647	27159483	27149146	27151457	0.0328632	6.27351	0.386875	0.705	0.846	-7.41826	0.278125	9.91468	1.08135	0.337	0.614584	-6.04333	2402892	0.309725	7.47936	2.51112	0.0379	0.0575	-5.13979	-0.500895	8.16875	-3.11939	0.0121	0.0194	-4.13294	-0.324188	7.64837	-2.66076	0.0276	0.0417	-4.90108	0	0	1	0	0	1	0	1	0
19492	388610	LOC388610	NM_001013642	1	0	27192784	27199730	27192864	27193547	0.271615	6.516	3.19872	0.00677	0.0273	-3.43124	-1.03763	7.78436	-2.64931	0.0533	0.30012	-4.17507	2326846	1.69094	6.24858	9.00312	2.64e-05	0.00013	2.72223	1.00734	6.40959	3.17667	-1000	-1000	-1000	0.738491	6.4509	2.64873	-1000	-1000	-1000	0	1	0	0	1	0	1	0	0
24928	115572	FAM46B	NM_052943	1	1	27204099	27211913	27205021	27211744	-0.046275	5.33277	-0.437963	0.668	0.823	-7.39597	-2.00006	8.45617	-4.72902	0.00774	0.160435	-2.05404	2402914	0.756499	4.47789	1.8056	-1000	-1000	-1000	-0.239182	4.16234	-0.545158	-1000	-1000	-1000	1.08876	4.57128	3.70802	-1000	-1000	-1000	0	1	0	0	1	0	0	1	0
20660	6548	SLC9A1	NM_003047	1	1	27297893	27353987	27299384	27353411	0.0840886	8.51565	1.04448	0.315	0.541	-6.93619	2.80466	6.22346	5.14336	0.00566	0.150815	-1.7139	2402942	-0.29751	9.1055	-2.08909	0.0721	0.101	-5.78339	-0.431353	8.9673	-2.85875	0.0185	0.0286	-4.56897	-0.381573	9.05914	-4.51023	0.00174	0.00354	-2.00508	0	0	1	0	0	1	0	1	0
8997	23038	WDTC1	NM_015023	1	0	27433745	27507321	27460132	27505460	-0.863879	9.19832	-10.2457	1.05e-07	2.52e-06	8.00153	1.1229	6.88091	3.03754	0.0353	0.257652	-3.72508	2326912	-1.43594	10.0043	-9.65476	1.62e-05	9.23e-05	3.25996	-1.11666	10.735	-13.4909	2.35e-07	2.7e-06	7.47752	-0.995584	9.60166	-12.4556	1.05e-06	1.13e-05	6.03865	0	0	1	0	0	1	0	0	1
11999	84065	C1orf160	NM_032125	1	0	27521308	27535476	27521335	27534543	0.0263669	9.67298	0.329076	0.747	0.873	-7.44022	-0.387178	8.05942	-1.46121	0.213	0.511069	-5.62196	2326954	0.296462	8.89631	1.87261	0.1	0.136	-6.10197	-0.370322	8.50996	-4.47129	0.00148	0.00293	-1.93724	-0.325566	9.34633	-4.55897	0.00163	0.00334	-1.93376	0	0	1	0	0	1	0	1	0
12853	84958	SYTL1	NM_032872	1	0	27541099	27553007	27544412	27552929	-1.9566	8.26313	-7.87232	2.23e-06	2.95e-05	4.82552	-0.370246	7.96166	-1.43716	0.22	0.517402	-5.65012	2326993	-0.526653	8.6495	-4.14723	0.00364	0.00736	-2.66938	-0.70484	10.2721	-6.00758	0.000186	0.000464	0.283004	-1.21216	9.40693	-16.2558	1.21e-07	3.11e-06	8.33885	0	0	1	0	0	1	0	0	1
3435	9064	MAP3K6	NM_004672	1	1	27554256	27565923	27554468	27565674	0.13427	5.96348	1.47495	0.163	0.353	-6.41834	-0.299217	9.92006	-1.33371	0.249	0.54459	-5.76937	2403027	0.137517	7.22193	0.916175	0.388	0.446	-7.27951	-0.374557	7.84052	-3.28911	0.00916	0.0151	-3.84946	-0.187991	7.27242	-2.47994	0.0368	0.0541	-5.19126	0	0	1	0	1	0	0	1	0
-1	8547	FCN3	NM_003665	1	1	27568189	27573901	27568313	27573895	-0.157599	5.66741	-2.00674	0.0654	0.179	-5.61283	-0.541743	6.0079	-1.88873	0.127	0.4128	-5.10394	2403080	0.647068	6.31358	2.10389	-1000	-1000	-1000	0.0839475	5.88987	0.425016	-1000	-1000	-1000	0.303329	6.24299	1.27743	-1000	-1000	-1000	0	1	0	0	1	0	0	1	0
-1	8547	FCN3	NM_173452	1	1	27568189	27573901	27568313	27573895	-0.157599	5.66741	-2.00674	0.0654	0.179	-5.61283	-0.541743	6.0079	-1.88873	0.127	0.4128	-5.10394	2403080	0.647068	6.31358	2.10389	-1000	-1000	-1000	0.0839475	5.88987	0.425016	-1000	-1000	-1000	0.303329	6.24299	1.27743	-1000	-1000	-1000	0	1	0	0	1	0	0	1	0
19231	388611	CD164L2	NM_207397	1	1	27578183	27582391	27579123	27582315	-1000	-1000	-1000	-1000	-1000	-1000	-1000	-1000	-1000	-1000	-1000	-1000	2403099	0.175671	5.1041	0.229589	-1000	-1000	-1000	-0.824098	5.4271	-2.59046	-1000	-1000	-1000	0.928992	4.06611	1.23271	-1000	-1000	-1000	0	1	0	0	1	0	0	1	0
31303	2827	GPR3	NM_005281	1	0	27591738	27594901	27592889	27593881	0.0227881	6.88214	0.307248	0.763	0.881	-7.44761	-0.765021	4.90254	-1.66001	0.168	0.462027	-5.38427	2327045	-0.172757	7.12866	-1.03988	0.33	0.388	-7.15821	0.00282625	6.91948	0.0126139	-1000	-1000	-1000	-0.006244	6.67628	-0.0127616	-1000	-1000	-1000	0	1	0	0	1	0	0	1	0
86920	10163	WASF2	NM_006990	1	1	27604712	27689255	27607269	27627986	-0.743103	10.196	-7.02484	7.73e-06	8.28e-05	3.52796	0.0766763	7.34482	0.210156	0.843	0.936242	-6.64302	2403111	-1.32915	10.1395	-6.95246	0.000154	0.000513	0.783787	-0.847028	9.82354	-9.55132	4.58e-06	2.22e-05	4.28381	-0.838845	10.4863	-13.3596	5.96e-07	7.94e-06	6.64364	0	0	1	0	0	1	0	0	1
17144	27245	AHDC1	NM_001029882	1	1	27733770	27802690	27746401	27751212	-0.151821	6.56462	-1.74779	0.103	0.253	-6.02444	1.27227	8.69564	4.61139	0.00849	0.163992	-2.1552	2403158	-0.200717	8.54555	-0.827744	0.433	0.489	-7.35865	-0.352188	8.60538	-2.69816	0.0241	0.0364	-4.83677	-0.624891	9.30875	-4.51583	0.00173	0.00352	-1.99686	0	0	1	0	0	1	0	1	0
-1	-1	FGR	NM_001042747	1	1	27811388	27825337	27812011	27823013	-1000	-1000	-1000	-1000	-1000	-1000	-1.07006	3.16847	-2.12389	0.0965	0.370546	-4.81336	2403215	-0.727939	10.9816	-6.35395	0.000278	0.000825	0.134139	-0.874662	12.3181	-10.3759	2.28e-06	1.3e-05	5.03971	-0.590446	11.0114	-8.52059	2.05e-05	8.76e-05	2.81476	0	0	1	0	0	1	0	0	1
-1	-1	FGR	NM_001042729	1	1	27811388	27825692	27812011	27823013	-1000	-1000	-1000	-1000	-1000	-1000	-1.07006	3.16847	-2.12389	0.0965	0.370546	-4.81336	2403215	-0.727939	10.9816	-6.35395	0.000278	0.000825	0.134139	-0.874662	12.3181	-10.3759	2.28e-06	1.3e-05	5.03971	-0.590446	11.0114	-8.52059	2.05e-05	8.76e-05	2.81476	0	0	1	0	0	1	0	0	1
3842	2268	FGR	NM_005248	1	1	27811388	27834313	27812011	27823013	-0.878091	9.58301	-7.30367	5.08e-06	5.82e-05	3.96527	-1.07006	3.16847	-2.12389	0.0965	0.370546	-4.81336	2403215	-0.727939	10.9816	-6.35395	0.000278	0.000825	0.134139	-0.874662	12.3181	-10.3759	2.28e-06	1.3e-05	5.03971	-0.590446	11.0114	-8.52059	2.05e-05	8.76e-05	2.81476	0	0	1	0	0	1	0	0	1
49720	2537	IFI6	NM_002038	1	1	27865158	27871310	27865478	27868411	-2.13591	8.28477	-6.6928	1.29e-05	0.000127	2.99355	2.19392	8.95126	2.03338	0.107	0.384949	-4.92519	2403261	-3.58209	10.7833	-26.6194	9.47e-09	2.6e-06	11.0554	-1.61442	12.2683	-6.19596	0.000148	0.00038	0.532821	-1.31249	12.1776	-7.26993	6.73e-05	0.000221	1.52013	0	0	1	0	0	1	0	0	1
49720	2537	IFI6	NM_022872	1	1	27865158	27871310	27865478	27868411	-2.13591	8.28477	-6.6928	1.29e-05	0.000127	2.99355	2.19392	8.95126	2.03338	0.107	0.384949	-4.92519	2403261	-3.58209	10.7833	-26.6194	9.47e-09	2.6e-06	11.0554	-1.61442	12.2683	-6.19596	0.000148	0.00038	0.532821	-1.31249	12.1776	-7.26993	6.73e-05	0.000221	1.52013	0	0	1	0	0	1	0	0	1
49720	2537	IFI6	NM_022873	1	1	27865158	27871310	27865478	27868411	-2.13591	8.28477	-6.6928	1.29e-05	0.000127	2.99355	2.19392	8.95126	2.03338	0.107	0.384949	-4.92519	2403261	-3.58209	10.7833	-26.6194	9.47e-09	2.6e-06	11.0554	-1.61442	12.2683	-6.19596	0.000148	0.00038	0.532821	-1.31249	12.1776	-7.26993	6.73e-05	0.000221	1.52013	0	0	1	0	0	1	0	0	1
27071	199870	FAM76A	NM_152660	1	0	27925076	27960700	27925178	27959678	-0.0101219	5.76347	-0.104174	0.919	0.963	-7.4922	0.790956	7.68869	1.94597	0.119	0.4004	-5.03325	2327188	-0.222707	9.5797	-1.52549	0.168	0.214	-6.58312	-0.377615	8.07252	-2.76471	0.0216	0.033	-4.72596	-0.146395	8.18177	-1.2401	0.248	0.3	-6.9787	0	0	1	0	1	0	0	1	0
41508	23673	STX12	NM_177424	1	0	27972369	28023400	27972405	28021426	-0.635539	8.98225	-7.03528	7.61e-06	8.17e-05	3.54452	0.131918	10.0989	0.577618	0.593	0.799839	-6.47473	2327219	-1.01855	10.0206	-8.42135	4.2e-05	0.000185	2.21277	-1.18093	9.35889	-11.8379	7.34e-07	5.81e-06	6.25785	-1.14717	10.0239	-13.5858	5.2e-07	7.34e-06	6.78875	0	0	1	0	0	1	0	0	1
8555	5511	PPP1R8	NM_014110	1	0	28029879	28050769	28029933	28049543	0.586793	10.1817	8.37884	1.1e-06	1.66e-05	5.55738	-0.571319	10.0182	-2.47976	0.0642	0.321093	-4.3781	2327259	0.704105	10.832	4.54387	0.00218	0.00472	-2.115	0.566574	9.7201	5.74179	0.00026	0.000624	-0.0776393	0.263196	10.5367	3.42038	0.00844	0.0143	-3.67807	1	0	0	1	0	0	1	0	0
8555	5511	PPP1R8	NM_138558	1	0	28029879	28050769	28040266	28049543	0.586793	10.1817	8.37884	1.1e-06	1.66e-05	5.55738	-0.571319	10.0182	-2.47976	0.0642	0.321093	-4.3781	2327259	0.704105	10.832	4.54387	0.00218	0.00472	-2.115	0.566574	9.7201	5.74179	0.00026	0.000624	-0.0776393	0.263196	10.5367	3.42038	0.00844	0.0143	-3.67807	1	0	0	1	0	0	1	0	0
8555	5511	PPP1R8	NM_002713	1	0	28029879	28050769	28046160	28049543	0.586793	10.1817	8.37884	1.1e-06	1.66e-05	5.55738	-0.571319	10.0182	-2.47976	0.0642	0.321093	-4.3781	2327259	0.704105	10.832	4.54387	0.00218	0.00472	-2.115	0.566574	9.7201	5.74179	0.00026	0.000624	-0.0776393	0.263196	10.5367	3.42038	0.00844	0.0143	-3.67807	1	0	0	1	0	0	1	0	0
21009	9473	C1orf38	NM_001039477	1	0	28071641	28085778	28071669	28084528	-2.01842	8.07374	-6.20739	2.81e-05	0.000245	2.18516	-0.649387	6.65728	-2.49486	0.0632	0.319058	-4.35988	2327283	-2.48548	9.50155	-22.347	3.5e-08	3.59e-06	9.77116	-2.32232	9.75454	-20.241	6.38e-09	3.41e-07	11.2684	-2.26498	10.2904	-12.9896	7.47e-07	9.2e-06	6.40095	0	0	1	0	0	1	0	0	1
21009	9473	C1orf38	NM_004848	1	0	28071641	28085778	28071669	28084528	-2.01842	8.07374	-6.20739	2.81e-05	0.000245	2.18516	-0.649387	6.65728	-2.49486	0.0632	0.319058	-4.35988	2327283	-2.48548	9.50155	-22.347	3.5e-08	3.59e-06	9.77116	-2.32232	9.75454	-20.241	6.38e-09	3.41e-07	11.2684	-2.26498	10.2904	-12.9896	7.47e-07	9.2e-06	6.40095	0	0	1	0	0	1	0	0	1
37712	6118	RPA2	NM_002946	1	1	28090636	28113822	28091260	28113540	0.298887	10.3578	5.11673	0.000181	0.00121	0.252397	-0.759633	11.1817	-3.03216	0.0355	0.257925	-3.73117	2403301	0.708095	9.0486	6.42227	0.00026	0.000781	0.210482	0.372796	8.1517	1.92829	0.0853	0.114	-6.07424	-0.145468	10.49	-1.43878	0.186	0.233	-6.73401	0	1	0	0	1	0	1	0	0
8708	27293	SMPDL3B	NM_001009568	1	0	28134090	28155576	28134281	28155296	0.187703	5.45352	2.0549	0.06	0.167	-5.5328	-0.609167	7.53518	-1.44565	0.217	0.514989	-5.6402	-1000	-1000	-1000	-1000	-1000	-1000	-1000	-1000	-1000	-1000	-1000	-1000	-1000	-1000	-1000	-1000	-1000	-1000	-1000	0	1	0	0	1	0	0	1	0
8708	27293	SMPDL3B	NM_014474	1	0	28134090	28158248	28134281	28157935	0.187703	5.45352	2.0549	0.06	0.167	-5.5328	-0.609167	7.53518	-1.44565	0.217	0.514989	-5.6402	-1000	-1000	-1000	-1000	-1000	-1000	-1000	-1000	-1000	-1000	-1000	-1000	-1000	-1000	-1000	-1000	-1000	-1000	-1000	0	1	0	0	1	0	0	1	0
23068	55113	XKR8	NM_018053	1	0	28159090	28167190	28159167	28166297	0.0857528	8.82319	1.18837	0.255	0.475	-6.77884	-0.279504	11.0244	-0.976235	0.381	0.649763	-6.14814	2327338	-1.08002	9.78205	-8.714	3.31e-05	0.000155	2.47269	-0.906701	9.61532	-4.48652	0.00145	0.00287	-1.91363	-0.863133	10.0661	-2.67423	0.027	0.0409	-4.87938	0	0	1	0	0	1	0	0	1
1508	2140	EYA3	NM_001990	1	1	28173405	28287717	28173563	28257123	0.338576	9.42068	3.94426	0.0016	0.00788	-1.97799	-0.459162	7.0402	-1.86184	0.132	0.418443	-5.13711	2403335	0.448603	9.44088	3.91113	0.00499	0.0097	-3.00964	-0.045593	7.99402	-0.24163	0.814	0.841	-7.76946	0.331468	8.3022	2.30231	0.0488	0.0699	-5.47319	0	1	0	0	1	0	1	0	0
20260	5724	PTAFR	NM_000952	1	1	28348450	28375777	28349090	28350118	-1.34461	7.55713	-10.0306	1.36e-07	3.07e-06	7.73858	-0.63516	4.15393	-1.63757	0.172	0.466387	-5.41146	2403446	-2.36838	9.99124	-19.8717	8.4e-08	4.83e-06	8.88356	-2.74592	9.28381	-30.6427	1.5e-10	1.01e-07	14.9919	-2.42397	9.75701	-9.747	7.27e-06	4.15e-05	3.9411	0	0	1	0	0	1	0	0	1
40935	22826	DNAJC8	NM_014280	1	1	28399378	28432128	28400345	28432095	0.436142	8.86537	5.11047	0.000183	0.00123	0.240859	-0.385389	9.97197	-1.55267	0.191	0.48663	-5.51359	2403470	0.681987	11.9469	4.96056	0.0013	0.00303	-1.55673	0.666509	11.0448	5.2506	0.000496	0.0011	-0.769892	0.0879417	11.8217	0.737311	0.481	0.536	-7.47315	1	0	0	0	1	0	1	0	0
40581	93974	ATPIF1	NM_178191	1	0	28435197	28437195	28435281	28435553	-0.25271	7.7022	-2.68911	0.0182	0.0634	-4.40333	-0.114529	13.9662	-0.497572	0.643	0.831401	-6.52361	2327375	0.253863	10.9762	1.63543	0.143	0.185	-6.43564	0.21824	11.2019	1.44466	0.182	0.224	-6.76087	-0.221981	12.1003	-3.79585	0.00481	0.00868	-3.08626	0	1	0	0	0	1	0	1	0
40581	93974	ATPIF1	NM_178190	1	0	28435197	28437195	28435281	28436894	-0.25271	7.7022	-2.68911	0.0182	0.0634	-4.40333	-0.114529	13.9662	-0.497572	0.643	0.831401	-6.52361	2327375	0.253863	10.9762	1.63543	0.143	0.185	-6.43564	0.21824	11.2019	1.44466	0.182	0.224	-6.76087	-0.221981	12.1003	-3.79585	0.00481	0.00868	-3.08626	0	1	0	0	0	1	0	1	0
40581	93974	ATPIF1	NM_016311	1	0	28435197	28437195	28435281	28437075	-0.25271	7.7022	-2.68911	0.0182	0.0634	-4.40333	-0.114529	13.9662	-0.497572	0.643	0.831401	-6.52361	2327375	0.253863	10.9762	1.63543	0.143	0.185	-6.43564	0.21824	11.2019	1.44466	0.182	0.224	-6.76087	-0.221981	12.1003	-3.79585	0.00481	0.00868	-3.08626	0	1	0	0	0	1	0	1	0
12873	83667	SESN2	NM_031459	1	0	28458592	28481587	28458945	28479899	-0.125361	9.04489	-0.598095	0.56	0.752	-7.30888	0.387653	9.04771	1.09681	0.331	0.609959	-6.02739	2327391	-0.505741	9.12543	-3.48463	0.00902	0.0163	-3.64203	-0.492843	9.54542	-3.2604	0.0096	0.0157	-3.89734	-0.550435	9.33992	-6.76015	0.000114	0.000342	0.943373	0	0	1	0	0	1	0	0	1
9756	54797	MED18	NM_017638	1	0	28528135	28535061	28529760	28534067	-0.252477	7.53025	-3.63207	0.00291	0.0132	-2.58708	-1.29293	5.59342	-1.95279	0.118	0.399228	-5.02482	2327418	-0.0985013	8.21437	-0.524515	0.615	0.662	-7.57653	-0.525485	7.95701	-2.47608	0.0348	0.0509	-5.20392	-1.06227	8.91751	-6.9475	9.38e-05	0.000291	1.1589	0	1	0	0	0	1	0	1	0
-1	-1	PHACTR4	NM_001048183	1	0	28568679	28699466	28606545	28695647	-1000	-1000	-1000	-1000	-1000	-1000	-0.455189	7.48131	-1.54147	0.194	0.48908	-5.52695	-1000	-1000	-1000	-1000	-1000	-1000	-1000	-1000	-1000	-1000	-1000	-1000	-1000	-1000	-1000	-1000	-1000	-1000	-1000	0	1	0	0	1	0	0	1	0
41537	65979	PHACTR4	NM_023923	1	0	28637247	28699466	28637482	28695647	0.0866974	9.16717	1.07278	0.302	0.529	-6.90659	-0.455189	7.48131	-1.54147	0.194	0.48908	-5.52695	-1000	-1000	-1000	-1000	-1000	-1000	-1000	-1000	-1000	-1000	-1000	-1000	-1000	-1000	-1000	-1000	-1000	-1000	-1000	0	1	0	0	1	0	0	1	0
-1	-1	SNHG3-RCC1	NM_001048197	1	0	28705082	28738193	28728965	28737105	-1000	-1000	-1000	-1000	-1000	-1000	0.258897	8.42637	1.14089	0.314	0.596411	-5.98127	2327482	2.43599	10.0058	19.1369	1.11e-07	5.2e-06	8.59527	2.33677	10.1244	19.9824	7.16e-09	3.52e-07	11.1495	2.01705	10.0852	22.2333	9.21e-09	9.02e-07	11.0058	1	0	0	1	0	0	1	0	0
-1	-1	SNHG3-RCC1	NM_001048198	1	0	28705082	28738193	28728965	28737105	-1000	-1000	-1000	-1000	-1000	-1000	0.258897	8.42637	1.14089	0.314	0.596411	-5.98127	2327482	2.43599	10.0058	19.1369	1.11e-07	5.2e-06	8.59527	2.33677	10.1244	19.9824	7.16e-09	3.52e-07	11.1495	2.01705	10.0852	22.2333	9.21e-09	9.02e-07	11.0058	1	0	0	1	0	0	1	0	0
-1	-1	SNHG3-RCC1	NM_001048199	1	0	28705082	28738193	28728965	28737105	-1000	-1000	-1000	-1000	-1000	-1000	0.258897	8.42637	1.14089	0.314	0.596411	-5.98127	2327482	2.43599	10.0058	19.1369	1.11e-07	5.2e-06	8.59527	2.33677	10.1244	19.9824	7.16e-09	3.52e-07	11.1495	2.01705	10.0852	22.2333	9.21e-09	9.02e-07	11.0058	1	0	0	1	0	0	1	0	0
-1	-1	RCC1	NM_001269	1	0	28717331	28738193	28728965	28737105	-1000	-1000	-1000	-1000	-1000	-1000	0.45446	6.82091	1.2842	0.264	0.556455	-5.8252	2327482	2.43599	10.0058	19.1369	1.11e-07	5.2e-06	8.59527	2.33677	10.1244	19.9824	7.16e-09	3.52e-07	11.1495	2.01705	10.0852	22.2333	9.21e-09	9.02e-07	11.0058	1	0	0	1	0	0	1	0	0
107350	1104	RCC1	NM_001048195	1	0	28717331	28738193	28728965	28737105	2.14356	8.901	6.07699	3.48e-05	0.000295	1.96247	0.258897	8.42637	1.14089	0.314	0.596411	-5.98127	2327482	2.43599	10.0058	19.1369	1.11e-07	5.2e-06	8.59527	2.33677	10.1244	19.9824	7.16e-09	3.52e-07	11.1495	2.01705	10.0852	22.2333	9.21e-09	9.02e-07	11.0058	1	0	0	1	0	0	1	0	0
-1	-1	RCC1	NM_001048194	1	0	28717331	28738193	28728965	28737105	-1000	-1000	-1000	-1000	-1000	-1000	-1000	-1000	-1000	-1000	-1000	-1000	2327482	2.43599	10.0058	19.1369	1.11e-07	5.2e-06	8.59527	2.33677	10.1244	19.9824	7.16e-09	3.52e-07	11.1495	2.01705	10.0852	22.2333	9.21e-09	9.02e-07	11.0058	1	0	0	1	0	0	1	0	0
49509	54952	TRSPAP1	NM_017846	1	0	28752115	28777642	28752209	28776734	0.147379	7.23783	1.52364	0.151	0.334	-6.35141	0.351945	9.83164	1.43535	0.22	0.517857	-5.65223	2327542	0.20538	8.46397	1.25528	0.247	0.299	-6.92063	0.0482417	8.40654	0.334702	0.745	0.779	-7.74004	-0.172855	9.57505	-2.09702	0.0676	0.0939	-5.79283	0	1	0	0	1	0	0	1	0
85237	115273	RAB42	NM_152304	1	0	28791298	28793672	28792898	28793215	-0.104575	7.30289	-1.38948	0.187	0.387	-6.532	0.110767	8.27401	0.298188	0.78	0.906292	-6.61627	2327572	0.693877	5.49341	1.2822	-1000	-1000	-1000	-0.073459	5.84401	-0.224227	-1000	-1000	-1000	-0.0534693	5.85791	-0.148049	-1000	-1000	-1000	0	1	0	0	1	0	0	1	0
68477	6883	TAF12	NM_005644	1	1	28802199	28842171	28802637	28821179	-0.382655	7.95447	-4.23713	0.000914	0.00489	-1.41009	0.315481	10.6215	0.864813	0.433	0.689719	-6.25173	2403585	-0.467664	9.06746	-3.64004	0.00725	0.0134	-3.40914	-0.456414	8.7574	-4.19613	0.00223	0.0042	-2.36887	-0.93836	10.0134	-12.2866	1.17e-06	1.22e-05	5.92087	0	0	1	0	0	1	0	0	1
10647	10691	GMEB1	NM_006582	1	0	28867830	28913971	28882711	28913871	-0.302637	7.02552	-4.41067	0.000659	0.00368	-1.07625	0.349478	9.08199	0.604992	0.576	0.789082	-6.45658	2327603	-0.430067	9.9122	-3.07231	0.0164	0.0276	-4.27097	-0.505038	8.84971	-6.08513	0.000169	0.000427	0.386418	-0.43294	9.13162	-5.84591	0.000319	0.000809	-0.171623	0	0	1	0	0	1	0	0	1
10647	10691	GMEB1	NM_024482	1	0	28867830	28913971	28882711	28913871	-0.302637	7.02552	-4.41067	0.000659	0.00368	-1.07625	0.349478	9.08199	0.604992	0.576	0.789082	-6.45658	2327603	-0.430067	9.9122	-3.07231	0.0164	0.0276	-4.27097	-0.505038	8.84971	-6.08513	0.000169	0.000427	0.386418	-0.43294	9.13162	-5.84591	0.000319	0.000809	-0.171623	0	0	1	0	0	1	0	0	1
32302	51441	YTHDF2	NM_016258	1	0	28935722	28968872	28936219	28968050	0.428504	10.3651	3.37307	0.00482	0.0204	-3.09249	-0.633044	12.3576	-0.96249	0.387	0.65394	-6.16136	2327630	0.493268	10.4628	4.11848	0.00378	0.00762	-2.71041	0.34868	9.99173	2.87657	0.0179	0.0279	-4.5392	-0.0178405	11.3827	-0.181069	0.861	0.884	-7.74906	1	0	0	0	1	0	1	0	0
20252	4985	OPRD1	NM_000911	1	0	29011240	29062794	29011482	29062381	0.0642072	5.98742	0.874282	0.397	0.623	-7.09979	0.411765	4.99108	1.0939	0.332	0.610611	-6.0304	2327659	-0.38261	8.49848	-2.53485	0.0366	0.0557	-5.1031	-0.682961	9.35472	-2.43998	0.0369	0.0537	-5.26307	-0.0629525	7.89861	-0.266885	0.796	0.828	-7.72773	0	1	0	0	1	0	0	1	0
44324	2035	EPB41	NM_203343	1	0	29086214	29319544	29186536	29314895	0.228079	6.41796	2.07944	0.0574	0.162	-5.49164	-0.237876	8.63293	-1.06465	0.343	0.619439	-6.06039	2327677	0.688413	10.0123	7.34416	0.000107	0.000384	1.18665	0.771678	8.42146	4.42516	0.00159	0.0031	-2.00892	0.667883	8.89789	4.6481	0.00145	0.00301	-1.80422	1	0	0	1	0	0	1	0	0
44324	2035	EPB41	NM_004437	1	0	29086214	29319544	29192587	29314895	0.228079	6.41796	2.07944	0.0574	0.162	-5.49164	-0.237876	8.63293	-1.06465	0.343	0.619439	-6.06039	2327677	0.688413	10.0123	7.34416	0.000107	0.000384	1.18665	0.771678	8.42146	4.42516	0.00159	0.0031	-2.00892	0.667883	8.89789	4.6481	0.00145	0.00301	-1.80422	1	0	0	1	0	0	1	0	0
44324	2035	EPB41	NM_203342	1	0	29086214	29319544	29192587	29314895	0.228079	6.41796	2.07944	0.0574	0.162	-5.49164	-0.237876	8.63293	-1.06465	0.343	0.619439	-6.06039	2327677	0.688413	10.0123	7.34416	0.000107	0.000384	1.18665	0.771678	8.42146	4.42516	0.00159	0.0031	-2.00892	0.667883	8.89789	4.6481	0.00145	0.00301	-1.80422	1	0	0	1	0	0	1	0	0
79738	399474	TTMB	NM_001003682	1	1	29318526	29322993	29320003	29320926	0.189025	5.72179	1.59859	0.133	0.306	-6.24543	-0.0525727	7.13149	-0.171327	0.872	0.949619	-6.65194	2403707	-0.679407	6.79637	-1.77256	0.116	0.155	-6.24502	-0.122389	6.57244	-0.664923	-1000	-1000	-1000	-0.055757	6.25583	-0.210103	-1000	-1000	-1000	0	1	0	0	1	0	0	1	0
25624	6429	SFRS4	NM_005626	1	1	29346951	29380947	29347508	29380850	0.307374	10.0413	1.98962	0.0675	0.183	-5.64102	0.0884553	11.6943	0.364112	0.733	0.882368	-6.59043	2403740	0.146966	11.4411	1.03302	0.333	0.391	-7.16524	0.078139	11.8408	0.822011	0.432	0.482	-7.44076	0.179272	10.6343	2.41261	0.0409	0.0595	-5.29857	0	1	0	0	1	0	0	1	0
5362	51102	MECR	NM_001024732	1	1	29391971	29430040	29393120	29415731	0.999776	7.90751	9.58823	2.31e-07	4.71e-06	7.18336	-0.123996	9.69568	-0.3755	0.725	0.878193	-6.58548	2403793	1.26152	9.47931	10.5039	8.89e-06	6.15e-05	3.91375	0.745102	9.54204	6.85652	6.78e-05	0.000196	1.37205	1.05578	9.40466	9.12093	1.22e-05	5.99e-05	3.38221	1	0	0	1	0	0	1	0	0
5362	51102	MECR	NM_016011	1	1	29391971	29430040	29393120	29430004	0.999776	7.90751	9.58823	2.31e-07	4.71e-06	7.18336	-0.123996	9.69568	-0.3755	0.725	0.878193	-6.58548	2403793	1.26152	9.47931	10.5039	8.89e-06	6.15e-05	3.91375	0.745102	9.54204	6.85652	6.78e-05	0.000196	1.37205	1.05578	9.40466	9.12093	1.22e-05	5.99e-05	3.38221	1	0	0	1	0	0	1	0	0
4168	10076	PTPRU	NM_005704	1	0	29435633	29525901	29435743	29524759	-0.069892	7.49607	-0.809935	0.432	0.653	-7.15492	0.636462	7.50582	2.29094	0.0795	0.345046	-4.60785	2327817	-0.248158	6.09381	-1.14533	-1000	-1000	-1000	-0.116259	5.93614	-0.894123	-1000	-1000	-1000	-0.227066	6.0551	-1.06716	-1000	-1000	-1000	0	1	0	0	1	0	0	1	0
4168	10076	PTPRU	NM_133177	1	0	29435633	29525901	29435743	29524759	-0.069892	7.49607	-0.809935	0.432	0.653	-7.15492	0.636462	7.50582	2.29094	0.0795	0.345046	-4.60785	2327817	-0.248158	6.09381	-1.14533	-1000	-1000	-1000	-0.116259	5.93614	-0.894123	-1000	-1000	-1000	-0.227066	6.0551	-1.06716	-1000	-1000	-1000	0	1	0	0	1	0	0	1	0
4168	10076	PTPRU	NM_133178	1	0	29435633	29525901	29435743	29524759	-0.069892	7.49607	-0.809935	0.432	0.653	-7.15492	0.636462	7.50582	2.29094	0.0795	0.345046	-4.60785	2327817	-0.248158	6.09381	-1.14533	-1000	-1000	-1000	-0.116259	5.93614	-0.894123	-1000	-1000	-1000	-0.227066	6.0551	-1.06716	-1000	-1000	-1000	0	1	0	0	1	0	0	1	0
1783	4146	MATN1	NM_002379	1	1	30958584	30969473	30959015	30968984	-0.0389595	7.00032	-0.562361	0.583	0.768	-7.33055	-0.515969	5.92534	-1.96689	0.116	0.396723	-5.0074	2404122	0.389623	5.78521	1.4443	-1000	-1000	-1000	0.435734	5.81705	1.84843	-1000	-1000	-1000	0.286968	6.79447	1.51709	-1000	-1000	-1000	0	1	0	0	1	0	0	1	0
4922	7805	LAPTM5	NM_006762	1	1	30977902	31003253	30979261	31003178	-1.15222	12.6321	-9.27597	3.41e-07	6.47e-06	6.77911	-1.53858	3.41117	-4.10721	0.0129	0.183648	-2.61327	2404158	-1.19738	13.1566	-9.13244	2.39e-05	0.000121	2.83161	-1.57937	13.0643	-19.217	1.02e-08	4.3e-07	10.7871	-0.913119	12.8144	-10.7706	3.32e-06	2.42e-05	4.79015	0	0	1	0	0	1	0	0	1
7965	9672	SDC3	NM_014654	1	1	31118568	31154066	31118644	31154019	-0.147605	6.23083	-1.53019	0.149	0.331	-6.3423	-1000	-1000	-1000	-1000	-1000	-1000	2404209	-0.189516	6.86406	-0.736874	-1000	-1000	-1000	-0.263344	6.99221	-1.87087	0.0936	0.124	-6.16084	-0.0243525	6.87926	-0.0813786	-1000	-1000	-1000	0	1	0	0	1	0	0	1	0
22830	9698	PUM1	NM_001020658	1	1	31176939	31311150	31178644	31304999	-0.167582	9.68705	-2.05233	0.0603	0.168	-5.5371	0.749525	10.7173	2.96012	0.0383	0.26438	-3.813	2404254	-0.203955	11.761	-1.44855	0.188	0.235	-6.68311	-0.189776	11.3609	-2.37668	0.041	0.059	-5.36635	-0.253366	11.0316	-4.15667	0.00286	0.00545	-2.53203	0	1	0	0	0	1	0	1	0
22830	9698	PUM1	NM_014676	1	1	31176939	31311150	31178644	31304999	-0.167582	9.68705	-2.05233	0.0603	0.168	-5.5371	0.749525	10.7173	2.96012	0.0383	0.26438	-3.813	2404254	-0.203955	11.761	-1.44855	0.188	0.235	-6.68311	-0.189776	11.3609	-2.37668	0.041	0.059	-5.36635	-0.253366	11.0316	-4.15667	0.00286	0.00545	-2.53203	0	1	0	0	0	1	0	1	0
11566	79570	FAM77C	NM_024522	1	1	31425179	31433586	31427136	31433542	0.0581186	5.90229	0.85101	0.41	0.634	-7.12016	-3.75435	8.27299	-15.8705	5.83e-05	0.0936517	2.38951	2404344	0.094049	5.2776	0.194766	-1000	-1000	-1000	0.461729	5.62451	1.86518	-1000	-1000	-1000	0.107639	7.03095	0.59762	0.566	0.617	-7.57199	0	1	0	0	1	0	0	1	0
3538	9410	WDR57	NM_004814	1	1	31505001	31542230	31505505	31542184	0.770019	9.8061	8.88437	5.63e-07	9.6e-06	6.25712	-0.825462	8.83908	-3.69484	0.0186	0.208477	-3.01887	2404377	1.25012	10.9892	10.1956	1.1e-05	7.09e-05	3.68212	1.11296	10.1451	8.75692	9.46e-06	3.85e-05	3.50123	0.444173	11.2944	5.66474	0.000396	0.000974	-0.405677	1	0	0	1	0	0	1	0	0
32319	51538	ZCCHC17	NM_016505	1	0	31542428	31610366	31555532	31609626	0.210422	8.98108	2.85363	0.0132	0.0485	-4.0936	-0.393645	11.7502	-1.57867	0.185	0.479958	-5.48245	2328236	0.577936	9.8326	4.67591	0.00185	0.00409	-1.93539	0.277423	8.77429	1.50611	0.166	0.206	-6.67977	-0.00048675	9.70108	-0.00375596	0.997	0.997	-7.76733	0	1	0	0	1	0	1	0	0
68379	2170	FABP3	NM_004102	1	1	31610686	31618509	31611319	31618447	-0.0636047	5.26733	-0.628437	0.54	0.738	-7.28949	-1.65525	6.6722	-3.8359	0.0164	0.198736	-2.8769	2404418	0.130038	6.71328	0.412516	-1000	-1000	-1000	-0.373234	8.0127	-1.2282	0.25	0.298	-7.02864	-1.15794	7.66286	-5.3405	0.000589	0.00138	-0.835895	0	1	0	0	0	1	0	1	0
27797	347735	SERINC2	NM_178865	1	0	31658549	31680110	31658699	31679632	-1.06138	10.983	-3.9426	0.0016	0.0079	-1.98123	1.08648	6.90067	4.57392	0.00875	0.164926	-2.18787	2328273	-0.187578	8.73717	-1.60114	0.15	0.194	-6.48218	0.587828	9.80257	5.27193	0.000482	0.00107	-0.739133	-0.443421	8.57973	-4.99181	0.000918	0.00203	-1.31505	1	0	0	0	0	1	0	1	0
41472	64129	TINAGL1	NM_022164	1	0	31814746	31825871	31815336	31825166	-0.0232883	7.69341	-0.333261	0.744	0.871	-7.43875	2.30883	7.61514	3.84062	0.0163	0.19845	-2.87221	2328320	0.126878	5.45277	0.318097	-1000	-1000	-1000	-0.0447533	5.53073	-0.199207	-1000	-1000	-1000	0.173806	5.19792	0.554796	-1000	-1000	-1000	0	1	0	0	1	0	0	1	0
37492	3061	HCRTR1	NM_001525	1	0	31857227	31865300	31857380	31865167	0.0730952	4.48664	1.01972	0.326	0.553	-6.96156	-0.20193	9.56737	-0.758997	0.488	0.731067	-6.34186	2328387	0.001205	7.30255	0.00665613	0.995	0.996	-7.72919	-0.233891	7.64307	-1.74533	0.114	0.148	-6.34597	0.0472445	7.03196	0.168288	0.87	0.892	-7.75155	0	1	0	0	1	0	0	1	0
56569	553115	PEF1	NM_012392	1	1	31868057	31883063	31868800	31883051	0.0129296	9.6644	0.157893	0.877	0.941	-7.48466	0.477962	8.86142	1.65727	0.168	0.462641	-5.38759	2404521	0.264347	10.3132	2.10401	0.0705	0.0994	-5.76106	0.273668	9.7949	2.71647	0.0234	0.0355	-4.80631	-0.147797	10.9606	-2.1966	0.0577	0.0813	-5.63878	1	0	0	0	1	0	0	1	0
1397	1307	COL16A1	NM_001856	1	1	31890434	31942354	31890838	31940380	0.135815	5.39067	1.18488	0.257	0.477	-6.78284	0.903354	9.60745	2.63613	0.054	0.30169	-4.19072	2404546	-0.408281	9.00708	-2.74425	0.0267	0.0423	-4.77863	-0.369962	11.519	-2.68833	0.0245	0.037	-4.85311	-0.682516	8.8667	-4.9308	0.000994	0.00218	-1.40067	0	0	1	0	0	1	0	0	1
1288	576	BAI2	NM_001703	1	1	31965305	32002234	31965607	31995408	-0.306193	5.32227	-2.53695	0.0244	0.0808	-4.68487	-1.05165	6.14141	-3.31205	0.0268	0.233613	-3.42127	2404693	-0.442251	5.49657	-1.58528	-1000	-1000	-1000	-1.17975	6.07704	-7.69889	-1000	-1000	-1000	-0.791251	5.82994	-3.52672	-1000	-1000	-1000	0	1	0	0	1	0	0	1	0
83439	90853	SPOCD1	NM_144569	1	1	32028611	32054166	32028790	32053520	0.0237548	6.63475	0.273797	0.788	0.895	-7.45796	0.879398	6.28749	1.06775	0.342	0.61849	-6.05724	2404766	-0.434356	6.41689	-1.42028	-1000	-1000	-1000	0.005812	6.05712	0.027412	-1000	-1000	-1000	0.277877	5.99764	1.33234	-1000	-1000	-1000	0	1	0	0	1	0	0	1	0
20744	8073	PTP4A2	NM_080391	1	1	32146379	32176574	32147039	32157252	0.140928	11.0368	1.42041	0.178	0.375	-6.49144	-0.691715	8.22257	-3.0131	0.0362	0.259297	-3.75273	2404819	0.217289	11.986	1.61873	0.146	0.189	-6.45837	0.0421537	9.90433	0.517813	0.617	0.66	-7.65537	-0.17278	11.6027	-2.98235	0.0166	0.0263	-4.38177	0	1	0	0	0	1	0	1	0
20744	8073	PTP4A2	NM_080392	1	1	32146379	32176574	32147088	32157252	0.140928	11.0368	1.42041	0.178	0.375	-6.49144	-0.691715	8.22257	-3.0131	0.0362	0.259297	-3.75273	2404819	0.217289	11.986	1.61873	0.146	0.189	-6.45837	0.0421537	9.90433	0.517813	0.617	0.66	-7.65537	-0.17278	11.6027	-2.98235	0.0166	0.0263	-4.38177	0	1	0	0	0	1	0	1	0
4781	10657	KHDRBS1	NM_006559	1	0	32252077	32282057	32252183	32280811	-0.285261	7.21898	-2.86672	0.0129	0.0475	-4.06876	-0.549692	13.0564	-2.29726	0.079	0.34405	-4.60011	2328465	0.376038	11.5709	3.5462	0.00827	0.0151	-3.54944	0.483693	10.169	6.40568	0.000115	0.000305	0.805372	0.23468	11.2435	3.36572	0.00917	0.0155	-3.76527	1	0	0	1	0	0	1	0	0
-1	55116	TMEM39B	NM_018056	1	0	32311115	32341051	32314980	32340860	0.147106	8.38688	2.19805	0.0461	0.136	-5.28935	-0.570229	8.24919	-2.04909	0.105	0.382779	-4.90577	2328633	0.312469	8.85036	3.31441	0.0115	0.0201	-3.89993	-0.154459	8.89826	-1.42158	0.188	0.231	-6.79077	-0.194306	9.2776	-3.01116	0.0159	0.0252	-4.33523	0	1	0	0	0	1	1	0	0
22472	23633	KPNA6	NM_012316	1	0	32346243	32411360	32346318	32409081	0.330241	7.92047	2.39152	0.0321	0.101	-4.94855	0.0873877	9.82318	0.36069	0.735	0.883483	-6.59189	2328674	0.223106	10.7213	2.32931	0.05	0.0734	-5.41954	0.040601	9.0737	0.423201	0.682	0.721	-7.70348	-0.00738925	9.65613	-0.1025	0.921	0.935	-7.76148	0	1	0	0	1	0	0	1	0
14062	200081	TXLNA	NM_175852	1	0	32417931	32436471	32418533	32433382	0.16633	9.08937	1.51727	0.152	0.336	-6.36026	-0.891806	6.87577	-3.04664	0.035	0.25668	-3.71482	2328713	0.195874	11.0091	1.8662	0.101	0.137	-6.11123	0.12498	10.8837	1.38367	0.199	0.243	-6.83923	-0.0977575	10.074	-1.50176	0.17	0.214	-6.65178	0	1	0	0	1	0	0	1	0
11509	79140	CCDC28B	NM_024296	1	0	32438788	32443577	32440123	32443435	-0.401517	9.0834	-1.78889	0.0963	0.24	-5.96137	-0.592593	8.13359	-2.27011	0.0815	0.347829	-4.63339	2328750	-0.42655	9.15827	-3.72786	0.00642	0.0121	-3.27874	-0.366452	9.18751	-4.1791	0.00228	0.0043	-2.39589	-0.731934	11.0822	-10.4381	4.25e-06	2.82e-05	4.52265	0	0	1	0	0	1	0	0	1
49526	55721	IQCC	NM_018134	1	0	32443858	32446874	32443869	32446269	0.0923991	6.96546	0.631235	0.539	0.737	-7.28765	-0.229453	5.94698	-0.76339	0.485	0.729698	-6.33829	2328767	0.0586583	7.56876	0.294707	0.776	0.81	-7.68042	0.0095675	7.85114	0.071065	0.945	0.954	-7.79888	0.271537	7.23992	1.74601	0.117	0.153	-6.31506	0	1	0	0	1	0	0	1	0
41314	56063	C1orf91	NM_019118	1	1	32454386	32460512	32455040	32460509	-0.372345	6.67043	-4.40787	0.000663	0.0037	-1.08163	0.745663	7.46597	2.07566	0.102	0.3795	-4.87293	-1000	-1000	-1000	-1000	-1000	-1000	-1000	-1000	-1000	-1000	-1000	-1000	-1000	-1000	-1000	-1000	-1000	-1000	-1000	0	1	0	0	1	0	0	1	0
2786	8668	EIF3S2	NM_003757	1	0	32460557	32469790	32460629	32469383	0.925104	10.9273	13.1174	5.13e-09	2.6e-07	11.1231	-0.105247	12.7091	-0.46522	0.665	0.843604	-6.54154	2328808	0.941928	12.4195	6.90641	0.000161	0.000532	0.735297	1.19996	12.276	13.2403	2.77e-07	2.98e-06	7.30206	0.508308	12.4849	7.63565	4.68e-05	0.000166	1.91565	1	0	0	1	0	0	1	0	0
13085	84734	C1orf90	NM_032648	1	0	32485404	32487045	32485609	32486788	0.0477825	6.59542	0.549916	0.591	0.774	-7.3378	-0.232059	6.64208	-0.841109	0.445	0.699255	-6.27265	2328837	-0.290482	5.73311	-0.825148	-1000	-1000	-1000	0.167369	5.61392	0.831445	-1000	-1000	-1000	-0.326217	6.13251	-1.64502	-1000	-1000	-1000	0	1	0	0	1	0	0	1	0
3911	3932	LCK	NM_005356	1	0	32489426	32524351	32512517	32523903	0.462494	7.86216	1.69412	0.113	0.272	-6.10541	-4.80885	7.0713	-15.9508	5.7e-05	0.0936517	2.40283	2328841	0.140775	8.77661	1.06763	0.319	0.376	-7.1294	-0.311145	8.8563	-3.19463	0.0107	0.0173	-4.00715	-0.536378	9.03901	-8.1021	3e-05	0.000117	2.39936	0	0	1	0	0	1	0	1	0
-1	-1	LCK	NM_001042771	1	0	32512298	32524351	32512517	32523903	-1000	-1000	-1000	-1000	-1000	-1000	-4.80885	7.0713	-15.9508	5.7e-05	0.0936517	2.40283	2328841	0.140775	8.77661	1.06763	0.319	0.376	-7.1294	-0.311145	8.8563	-3.19463	0.0107	0.0173	-4.00715	-0.536378	9.03901	-8.1021	3e-05	0.000117	2.39936	0	0	1	0	0	1	0	1	0
68426	3065	HDAC1	NM_004964	1	0	32530294	32571810	32530357	32571231	0.0364989	11.0926	0.409789	0.688	0.836	-7.4086	0.197679	11.9974	0.878271	0.426	0.684897	-6.23966	2328868	0.22222	11.434	1.7623	0.118	0.157	-6.25951	-0.211014	12.0498	-2.22899	0.0523	0.0736	-5.60467	-0.255541	11.8806	-2.96198	0.0171	0.027	-4.41468	0	1	0	0	0	1	0	1	0
40748	65108	MARCKSL1	NM_023009	1	1	32572027	32574409	32572784	32574220	-0.28222	11.0448	-1.55116	0.144	0.323	-6.31291	-0.738593	10.153	-3.25761	0.0283	0.238337	-3.48052	2404999	-0.126593	9.4711	-0.830904	0.431	0.488	-7.35594	-0.254349	9.32699	-1.31336	0.221	0.267	-6.9268	-0.469328	9.30851	-2.24192	0.0537	0.0762	-5.56802	0	1	0	0	1	0	0	1	0
62163	81629	TSSK3	NM_052841	1	0	32600448	32602508	32600889	32602443	-0.135071	6.22661	-1.49256	0.159	0.346	-6.39431	-0.139968	5.76956	-0.555491	0.606	0.810002	-6.48887	2328909	0.486176	6.94728	2.18197	0.0626	0.0895	-5.64374	-0.865423	7.26404	-5.10864	0.000602	0.0013	-0.976259	-0.820997	7.00977	-2.2986	0.0491	0.0702	-5.47902	0	0	1	0	1	0	0	1	0
32386	55108	BSDC1	NM_018045	1	1	32603373	32632613	32606520	32632601	-0.92446	7.35578	-10.2817	1.01e-07	2.44e-06	8.04504	0.669065	10.9937	2.771	0.0467	0.284491	-4.03164	2405036	-0.836883	9.50636	-5.16859	0.00102	0.00246	-1.28732	-0.462972	10.4639	-4.74385	0.001	0.00206	-1.51946	-0.716874	9.23702	-8.93107	1.43e-05	6.69e-05	3.20623	0	0	1	0	0	1	0	0	1
-1	-1	ZBTB8	NM_001040441	1	0	32777358	32844127	32831119	32838606	-1000	-1000	-1000	-1000	-1000	-1000	0.286323	6.58486	0.732564	0.502	0.741755	-6.363	2328936	1.01125	3.16163	2.20785	-1000	-1000	-1000	1.08201	1.70233	1.55071	-1000	-1000	-1000	1.17567	3.56364	5.0602	-1000	-1000	-1000	0	1	0	0	1	0	0	1	0
12083	339487	ZBTB8OS	NM_178547	1	1	32859893	32888771	32860049	32888752	-0.0119974	9.33619	-0.0777325	0.939	0.972	-7.49477	-0.558077	10.8035	-2.13493	0.0952	0.369189	-4.79974	2405104	0.112267	9.99784	0.862741	0.415	0.472	-7.32812	-0.27028	8.98024	-3.3616	0.00815	0.0136	-3.72871	-0.233187	10.4866	-2.31904	0.0475	0.0682	-5.44681	0	0	1	0	1	0	0	1	0
21153	5928	RBBP4	NM_005610	1	0	32889410	32918838	32889494	32917892	0.156625	11.244	1.4406	0.173	0.367	-6.46462	-1.04798	8.36537	-3.4964	0.0224	0.220071	-3.22435	2328990	0.412817	12.4503	4.27949	0.00306	0.00632	-2.48207	0.423265	11.071	4.2013	0.00221	0.00417	-2.36067	0.110251	12.1128	1.43543	0.187	0.234	-6.73833	1	0	0	0	1	0	1	0	0
11351	81493	SYNC1	NM_030786	1	1	32918564	32933459	32920037	32933291	0.256302	7.42029	1.63215	0.126	0.293	-6.19685	0.740397	6.02067	1.57001	0.187	0.482158	-5.49283	2405152	-0.564869	6.54698	-1.67753	-1000	-1000	-1000	-0.12983	5.67099	-0.705386	-1000	-1000	-1000	-0.324454	6.43149	-0.779578	-1000	-1000	-1000	0	1	0	0	1	0	0	1	0
45837	57648	KIAA1522	NM_020888	1	0	32980098	33013157	32980142	33011074	-0.143598	7.68291	-1.85383	0.086	0.221	-5.8599	0.940692	11.9396	3.4385	0.0237	0.223459	-3.28557	2329041	-0.110059	6.97398	-0.671623	0.522	0.574	-7.48167	-0.45438	7.17057	-4.14955	0.00239	0.00447	-2.44286	-0.245927	6.92944	-1.48257	0.175	0.22	-6.67706	0	0	1	0	1	0	0	1	0
2730	8565	YARS	NM_003680	1	1	33013426	33056219	33014168	33055431	1.33284	10.5816	16.5402	2.74e-10	3.44e-08	14.1036	-0.616583	8.75151	-2.22993	0.0853	0.354535	-4.68273	2405192	1.82907	10.9858	12.1328	3.16e-06	3.15e-05	5.04062	-0.896854	10.9733	-11.193	1.19e-06	8.07e-06	5.73829	1.0556	11.0186	10.2824	4.79e-06	3.07e-05	4.39469	0	0	1	1	0	0	1	0	0
81892	64766	S100PBP	NM_001017406	1	0	33055762	33073251	33064287	33072225	-0.961757	8.91031	-7.58439	3.36e-06	4.12e-05	4.39517	-0.160451	9.34174	-0.492422	0.647	0.833239	-6.52654	2329077	-0.762734	10.1301	-5.6891	0.000564	0.00149	-0.63988	-0.896854	10.9733	-11.193	1.19e-06	8.07e-06	5.73829	-0.670826	9.83583	-7.96171	3.42e-05	0.000129	2.25614	0	0	1	0	0	1	0	0	1
81892	64766	S100PBP	NM_022753	1	0	33055762	33097061	33064287	33094225	-0.961757	8.91031	-7.58439	3.36e-06	4.12e-05	4.39517	-0.317037	11.5161	-1.25012	0.275	0.565917	-5.86309	2329077	-0.762734	10.1301	-5.6891	0.000564	0.00149	-0.63988	-0.896854	10.9733	-11.193	1.19e-06	8.07e-06	5.73829	-0.670826	9.83583	-7.96171	3.42e-05	0.000129	2.25614	0	0	1	0	0	1	0	0	1
17812	252995	FNDC5	NM_153756	1	1	33100463	33108933	33102481	33106560	-1.13958	7.15123	-7.25175	5.49e-06	6.21e-05	3.88462	-0.474066	4.678	-1.32076	0.253	0.547641	-5.78405	2405250	-1.89373	7.86379	-13.3902	1.54e-06	2.02e-05	5.81442	-2.62047	8.9049	-11.5698	8.94e-07	6.63e-06	6.04506	-1.5913	7.73236	-9.64005	7.92e-06	4.43e-05	3.84787	0	0	1	0	0	1	0	0	1
55634	3208	HPCA	NM_002143	1	0	33124684	33132832	33127086	33132049	-0.10257	6.60875	-1.00452	0.333	0.56	-6.97687	0.585739	4.92324	1.02897	0.358	0.631463	-6.09635	2329131	-0.435704	7.6597	-1.92202	0.0929	0.127	-6.03027	-0.239352	8.56883	-0.885819	0.398	0.449	-7.38488	-0.732414	7.54751	-2.35502	0.0449	0.0647	-5.38996	0	1	0	0	1	0	0	1	0
11937	113452	TMEM54	NM_033504	1	1	33132782	33139539	33132992	33139425	-0.193582	6.4111	-1.3053	0.214	0.423	-6.63895	3.84019	9.06194	8.44061	0.000803	0.10958	0.286991	2405284	-0.342871	7.79617	-3.15834	0.0144	0.0246	-4.13864	-0.604263	7.5443	-5.08294	0.000623	0.00135	-1.01392	-0.655533	7.63567	-4.06636	0.00325	0.00611	-2.66926	0	0	1	0	0	1	0	0	1
34999	127544	IBRDC3	NM_153341	1	1	33174633	33202300	33174993	33202299	-0.887481	8.46739	-7.94192	2.02e-06	2.72e-05	4.92797	0.12161	7.52177	0.459794	0.668	0.845516	-6.54444	2405312	-0.997162	10.82	-7.11958	0.000132	0.000453	0.957745	-0.877504	10.189	-11.8635	7.2e-07	5.73e-06	6.27792	-0.936198	10.546	-13.543	5.34e-07	7.46e-06	6.76148	0	0	1	0	0	1	0	0	1
1227	204	AK2	NM_013411	1	1	33246172	33275078	33249016	33275015	1.40175	10.4756	16.4449	2.95e-10	3.62e-08	14.0292	-0.479745	10.1899	-1.9855	0.114	0.393143	-4.98439	2405364	1.75415	11.7128	13.2645	1.65e-06	2.09e-05	5.7404	1.56651	11.0686	11.8014	7.54e-07	5.91e-06	6.22915	0.764217	11.7281	10.2179	5.03e-06	3.18e-05	4.34118	1	0	0	1	0	0	1	0	0
1227	204	AK2	NM_001625	1	1	33251169	33275057	33251368	33275015	1.40175	10.4756	16.4449	2.95e-10	3.62e-08	14.0292	0.0875737	10.4046	0.32884	0.758	0.894954	-6.60486	2405364	1.75415	11.7128	13.2645	1.65e-06	2.09e-05	5.7404	1.56651	11.0686	11.8014	7.54e-07	5.91e-06	6.22915	0.764217	11.7281	10.2179	5.03e-06	3.18e-05	4.34118	1	0	0	1	0	0	1	0	0
62172	113451	ADC	NM_052998	1	0	33319300	33358580	33320437	33358369	-0.248525	7.51681	-1.79729	0.0949	0.237	-5.94836	2.65849	6.80855	5.57229	0.00417	0.140624	-1.38681	2329196	0.572885	7.44136	2.53846	0.0364	0.0555	-5.09752	-0.158476	8.20744	-1.08692	0.305	0.354	-7.18652	-0.122953	7.62016	-0.707374	0.498	0.553	-7.49589	0	1	0	0	1	0	0	1	0
10071	55223	TRIM62	NM_018207	1	1	33383590	33419853	33385364	33419619	-0.261235	7.06507	-3.44816	0.00416	0.018	-2.94612	0.537904	8.1297	1.63075	0.174	0.467595	-5.4197	2405428	-0.331957	8.1956	-3.30325	0.0117	0.0204	-3.91695	-1.01257	8.09272	-8.80258	9.06e-06	3.73e-05	3.54778	-0.580682	8.099	-6.35853	0.000177	0.000493	0.46681	0	0	1	0	0	1	0	0	1
77409	149076	FLJ25476	NM_152493	1	0	33494760	33538906	33508762	33537233	-0.942281	9.10382	-10.5419	7.48e-08	1.93e-06	8.35628	1.33549	8.90782	5.13637	0.00569	0.150896	-1.71943	2329266	-1.43864	9.69316	-7.22034	0.00012	0.00042	1.06113	-0.97809	10.0529	-9.10735	6.83e-06	2.99e-05	3.85343	-1.02386	9.62896	-7.36372	6.12e-05	0.000205	1.62298	0	0	1	0	0	1	0	0	1
75090	1912	PHC2	NM_004427	1	1	33561810	33588085	33563052	33572429	0.117417	6.38978	1.39468	0.186	0.385	-6.52523	1.88681	10.2606	6.96593	0.00174	0.121101	-0.475466	2405469	0.515159	8.08975	4.47655	0.00237	0.00507	-2.20753	0.323922	8.25235	1.90464	0.0886	0.118	-6.11005	0.202572	8.50433	2.14288	0.0629	0.0878	-5.72214	0	1	0	0	1	0	1	0	0
75090	1912	PHC2	NM_198040	1	1	33561810	33613780	33563052	33613726	0.117417	6.38978	1.39468	0.186	0.385	-6.52523	1.88681	10.2606	6.96593	0.00174	0.121101	-0.475466	2405469	0.515159	8.08975	4.47655	0.00237	0.00507	-2.20753	0.323922	8.25235	1.90464	0.0886	0.118	-6.11005	0.202572	8.50433	2.14288	0.0629	0.0878	-5.72214	0	1	0	0	1	0	1	0	0
51463	7579	ZNF31	NM_145238	1	0	33710845	33734579	33717476	33733662	-0.218435	5.558	-2.21985	0.0443	0.131	-5.25158	0.958236	6.96472	1.26137	0.272	0.562954	-5.85063	-1000	-1000	-1000	-1000	-1000	-1000	-1000	-1000	-1000	-1000	-1000	-1000	-1000	-1000	-1000	-1000	-1000	-1000	-1000	0	1	0	0	1	0	0	1	0
89034	114784	CSMD2	NM_052896	1	1	33752195	34404029	33757704	34404000	-0.0887627	5.54718	-1.01812	0.327	0.554	-6.96318	-0.970293	4.75078	-4.01408	0.014	0.188222	-2.70238	2405576	0.345739	4.03941	0.845436	-1000	-1000	-1000	0.145717	4.21219	0.666543	-1000	-1000	-1000	-0.553938	4.03123	-1.91148	-1000	-1000	-1000	0	1	0	0	1	0	0	1	0
83321	127540	HMGB4	NM_145205	1	0	34098662	34102977	34102379	34102939	-0.0355691	4.8839	-0.297127	0.771	0.885	-7.45086	0.120695	5.10797	0.465405	0.664	0.843567	-6.54144	2329386	-0.165078	4.95261	-0.504271	-1000	-1000	-1000	0.220253	4.65107	0.618699	-1000	-1000	-1000	0.714687	4.42886	1.68642	-1000	-1000	-1000	0	1	0	0	1	0	0	1	0
83321	127540	HMGB4	NM_001008728	1	0	34102217	34102977	34102601	34102939	-0.0355691	4.8839	-0.297127	0.771	0.885	-7.45086	0.120695	5.10797	0.465405	0.664	0.843567	-6.54144	2329386	-0.165078	4.95261	-0.504271	-1000	-1000	-1000	0.220253	4.65107	0.618699	-1000	-1000	-1000	0.714687	4.42886	1.68642	-1000	-1000	-1000	0	1	0	0	1	0	0	1	0
57187	84970	C1orf94	NM_032884	1	0	34415857	34457315	34435662	34456948	-0.0368645	6.37979	-0.539805	0.598	0.779	-7.34357	-1.65099	5.89582	-6.46114	0.00235	0.123557	-0.781172	2329481	-0.721014	5.22362	-2.17497	-1000	-1000	-1000	-0.749383	4.82833	-2.12158	-1000	-1000	-1000	0.006847	4.4111	0.0221774	-1000	-1000	-1000	0	1	0	0	1	0	0	1	0
3858	2709	GJB5	NM_005268	1	0	34993307	34996698	34995518	34996339	0.0418085	6.03712	0.448764	0.661	0.818	-7.39092	-0.260862	2.26198	-0.69404	0.524	0.756509	-6.39277	4054437	-0.606762	6.2892	-1.67011	-1000	-1000	-1000	-0.411553	5.61931	-1.46826	-1000	-1000	-1000	-0.384773	6.33518	-0.93554	-1000	-1000	-1000	0	1	0	0	1	0	0	1	0
7339	127534	GJB4	NM_153212	1	0	34999364	35000513	34999442	35000242	-0.162889	7.31083	-1.45514	0.169	0.361	-6.44513	-0.204787	4.78269	-0.420233	0.695	0.861488	-6.56465	4054427	0.0534367	6.28127	0.0680475	-1000	-1000	-1000	0.313395	6.90817	0.684438	0.511	0.558	-7.54875	-0.713249	6.66486	-2.19131	0.0582	0.082	-5.64701	0	1	0	0	1	0	0	1	0
7338	2707	GJB3	NM_024009	1	0	35019376	35024550	35022950	35023762	-0.163246	6.76146	-2.15073	0.0503	0.146	-5.37071	-0.453248	4.28921	-0.362343	0.734	0.882901	-6.59119	4054414	-0.874557	5.34923	-1.72121	-1000	-1000	-1000	-0.31563	5.4136	-2.26343	-1000	-1000	-1000	-0.371773	5.37851	-1.24646	-1000	-1000	-1000	0	1	0	0	1	0	0	1	0
7338	2707	GJB3	NM_001005752	1	0	35020497	35024552	35022950	35023762	-0.163246	6.76146	-2.15073	0.0503	0.146	-5.37071	-0.453248	4.28921	-0.362343	0.734	0.882901	-6.59119	4054414	-0.874557	5.34923	-1.72121	-1000	-1000	-1000	-0.31563	5.4136	-2.26343	-1000	-1000	-1000	-0.371773	5.37851	-1.24646	-1000	-1000	-1000	0	1	0	0	1	0	0	1	0
1556	2701	GJA4	NM_002060	1	0	35031185	35033932	35032401	35033402	-0.0317219	4.41836	-0.488872	0.633	0.801	-7.37109	-1.25772	5.48772	-3.91133	0.0153	0.193965	-2.80237	4054405	-0.783687	7.55947	-3.31896	0.0114	0.02	-3.893	-0.215424	7.385	-0.835437	0.425	0.475	-7.4293	-0.179712	7.57004	-0.700209	0.503	0.557	-7.50121	0	1	0	0	1	0	0	0	1
-1	113444	C1orf212	NM_138428	1	1	35091710	35097931	35093304	35093867	0.508318	9.73878	8.17072	1.47e-06	2.1e-05	5.26049	-0.348658	11.5395	-1.41071	0.227	0.523998	-5.68091	-1000	-1000	-1000	-1000	-1000	-1000	-1000	-1000	-1000	-1000	-1000	-1000	-1000	-1000	-1000	-1000	-1000	-1000	-1000	0	1	0	0	1	0	0	1	0
5186	9204	ZMYM6	NM_007167	1	1	35224354	35270155	35225291	35268826	-1.05676	8.12742	-8.90133	5.51e-07	9.44e-06	6.28008	-0.89093	7.33501	-3.68749	0.0187	0.208575	-3.02637	2405992	-0.636018	10.4281	-5.12476	0.00107	0.00257	-1.34356	-1.15217	9.76955	-15.2943	7.78e-08	1.32e-06	8.6533	-0.712173	9.07751	-6.44807	0.00016	0.000455	0.574814	0	0	1	0	0	1	0	0	1
32904	79830	ZMYM1	NM_024772	1	0	35317558	35354040	35332175	35353446	0.125215	5.82904	1.15443	0.269	0.49	-6.81746	0.302834	8.01368	0.580076	0.591	0.79886	-6.47313	2329669	0.0279117	9.18194	0.17273	0.867	0.889	-7.71239	-0.292755	8.38174	-1.94948	0.0824	0.111	-6.042	0.0073995	8.20288	0.0780666	0.94	0.949	-7.76394	0	1	0	0	1	0	0	1	0
3714	6421	SFPQ	NM_005066	1	1	35421789	35431321	35422643	35431236	1.39013	11.3395	10.4529	8.29e-08	2.09e-06	8.25056	-1.29581	10.7091	-3.34433	0.026	0.231173	-3.38637	2406064	0.933272	11.8542	8.92485	2.81e-05	0.000136	2.65537	0.680164	11.5534	8.57322	1.13e-05	4.44e-05	3.31199	0.789077	11.6454	10.4979	4.07e-06	2.75e-05	4.57134	1	0	0	1	0	0	1	0	0
35470	9202	ZMYM4	NM_005095	1	0	35507154	35660130	35507234	35657864	0.434274	8.51871	5.56293	8.28e-05	0.000622	1.06211	-0.33594	8.91785	-0.889387	0.421	0.68078	-6.22961	2329752	0.141814	10.6467	1.19528	0.268	0.322	-6.98991	-0.1291	9.75393	-1.40721	0.192	0.235	-6.80923	-0.104949	9.88547	-0.96843	0.36	0.416	-7.2708	0	1	0	0	1	0	0	1	0
11764	79932	KIAA0319L	NM_024874	1	1	35671678	35795590	35673081	35792678	-0.795473	7.70313	-7.46731	3.99e-06	4.77e-05	4.21713	-0.174915	6.15308	-0.641592	0.554	0.775895	-6.43122	2406139	-0.894475	9.33307	-8.03533	5.8e-05	0.000237	1.85806	-0.98086	9.69277	-9.80627	3.67e-06	1.86e-05	4.52336	-0.834651	8.78233	-10.61	3.74e-06	2.6e-05	4.66191	0	0	1	0	0	1	0	0	1
11764	79932	KIAA0319L	NM_182686	1	1	35676729	35795590	35679205	35792678	-0.795473	7.70313	-7.46731	3.99e-06	4.77e-05	4.21713	-0.174915	6.15308	-0.641592	0.554	0.775895	-6.43122	-1000	-1000	-1000	-1000	-1000	-1000	-1000	-1000	-1000	-1000	-1000	-1000	-1000	-1000	-1000	-1000	-1000	-1000	-1000	0	1	0	0	1	0	0	1	0
8064	23154	NCDN	NM_001014839	1	0	35795979	35804964	35796378	35803850	0.731212	7.65538	7.28267	5.24e-06	5.97e-05	3.9327	-0.954335	6.39559	-3.23854	0.0288	0.240328	-3.5014	2329887	0.632379	8.42141	5.50122	0.000695	0.00177	-0.869249	0.479976	8.71164	4.63936	0.00116	0.00235	-1.67845	0.556153	8.05635	6.24817	0.000201	0.000547	0.332279	1	0	0	1	0	0	1	0	0
8064	23154	NCDN	NM_014284	1	0	35795979	35804964	35796378	35803850	0.731212	7.65538	7.28267	5.24e-06	5.97e-05	3.9327	-0.954335	6.39559	-3.23854	0.0288	0.240328	-3.5014	2329887	0.632379	8.42141	5.50122	0.000695	0.00177	-0.869249	0.479976	8.71164	4.63936	0.00116	0.00235	-1.67845	0.556153	8.05635	6.24817	0.000201	0.000547	0.332279	1	0	0	1	0	0	1	0	0
8064	23154	NCDN	NM_001014841	1	0	35795979	35804964	35797312	35803850	0.731212	7.65538	7.28267	5.24e-06	5.97e-05	3.9327	-0.954335	6.39559	-3.23854	0.0288	0.240328	-3.5014	2329887	0.632379	8.42141	5.50122	0.000695	0.00177	-0.869249	0.479976	8.71164	4.63936	0.00116	0.00235	-1.67845	0.556153	8.05635	6.24817	0.000201	0.000547	0.332279	1	0	0	1	0	0	1	0	0
2422	339488	TFAP2E	NM_178548	1	0	35811557	35833511	35811789	35832863	-0.13571	7.65001	-1.62185	0.128	0.297	-6.21184	1.13281	5.91337	4.05387	0.0135	0.185509	-2.66413	2329920	-0.224842	8.18482	-1.41315	0.197	0.246	-6.72812	-0.384232	8.73668	-3.77016	0.00427	0.00756	-3.05474	-0.308298	8.08107	-1.62964	0.14	0.18	-6.47878	0	0	1	0	1	0	0	1	0
2088	5690	PSMB2	NM_002794	1	1	35841326	35879729	35841454	35879619	0.924555	11.3322	14.3513	1.66e-09	1.17e-07	12.2766	-0.090852	12.1762	-0.40496	0.705	0.867889	-6.57201	2406245	1.02086	12.2799	9.74741	1.51e-05	8.86e-05	3.33377	0.929627	10.2979	9.93607	3.29e-06	1.72e-05	4.64327	0.546753	12.065	8.56715	1.97e-05	8.5e-05	2.85995	1	0	0	1	0	0	1	0	0
17566	127703	FLJ38984	NM_152374	1	1	35952063	35957376	35953819	35954508	0.672836	8.43903	8.20227	1.4e-06	2.03e-05	5.30583	0.030533	4.75392	0.0659512	0.95	0.982878	-6.66706	2406412	-0.0789253	8.12051	-0.529855	0.611	0.659	-7.57346	-0.0856278	8.25133	-0.855758	0.414	0.465	-7.41165	0.181401	8.13123	0.858818	0.414	0.471	-7.37251	0	1	0	0	1	0	0	1	0
11138	63967	CLSPN	NM_022111	1	1	35974406	36008137	35974683	36008057	0.527492	4.88457	5.91774	4.53e-05	0.00037	1.68738	-0.97173	4.94865	-4.23077	0.0116	0.178429	-2.49724	2406420	1.51255	8.64312	10.4081	9.49e-06	6.4e-05	3.84248	1.48037	7.69439	9.30622	5.7e-06	2.61e-05	4.04835	1.3046	7.46567	5.38007	0.000561	0.00132	-0.782603	1	0	0	1	0	0	1	0	0
41184	192670	EIF2C4	NM_017629	1	0	36046414	36093774	36046604	36091792	-1.45232	7.49165	-9.72302	1.96e-07	4.14e-06	7.35468	1.31498	7.03572	3.12517	0.0323	0.249418	-3.62675	2330002	-1.27438	9.23756	-12.1424	3.14e-06	3.14e-05	5.04685	-1.3663	8.87926	-14.3095	1.4e-07	1.91e-06	8.02926	-0.960226	8.77187	-13.5585	5.29e-07	7.44e-06	6.77132	0	0	1	0	0	1	0	0	1
81826	26523	EIF2C1	NM_012199	1	0	36121396	36162483	36121609	36157794	-0.173457	7.11894	-1.47228	0.164	0.354	-6.42197	-0.153157	5.25318	-0.388804	0.716	0.873656	-6.57951	2330075	0.0295243	10.3403	0.171705	0.868	0.89	-7.71259	0.132898	10.3778	1.2759	0.233	0.28	-6.97219	0.152564	9.29856	1.68055	0.13	0.168	-6.40784	0	1	0	0	1	0	0	1	0
49799	192669	EIF2C3	NM_024852	1	0	36169358	36294648	36169614	36293932	-0.828259	6.31664	-8.13381	1.54e-06	2.19e-05	5.20728	0.590191	7.50758	1.17314	0.302	0.586487	-5.94694	2330133	-0.643339	10.484	-5.03182	0.0012	0.00283	-1.46375	-0.768255	10.288	-9.1071	6.83e-06	2.99e-05	3.85319	-0.464019	8.96775	-6.7441	0.000116	0.000346	0.924713	0	0	1	0	0	1	0	0	1
49799	192669	EIF2C3	NM_177422	1	0	36169358	36294648	36242572	36293932	-0.828259	6.31664	-8.13381	1.54e-06	2.19e-05	5.20728	0.590191	7.50758	1.17314	0.302	0.586487	-5.94694	2330133	-0.643339	10.484	-5.03182	0.0012	0.00283	-1.46375	-0.768255	10.288	-9.1071	6.83e-06	2.99e-05	3.85319	-0.464019	8.96775	-6.7441	0.000116	0.000346	0.924713	0	0	1	0	0	1	0	0	1
8043	27285	TEKT2	NM_014466	1	0	36322262	36326461	36323109	36326373	0.0237139	5.95325	0.304646	0.765	0.882	-7.44846	-0.0256407	5.89927	-0.0757562	0.943	0.979474	-6.66622	2330234	-0.173076	6.01304	-0.611419	-1000	-1000	-1000	0.0964437	6.11516	0.622601	-1000	-1000	-1000	-0.110916	5.97366	-0.532282	-1000	-1000	-1000	0	1	0	0	1	0	0	1	0
9863	54936	ADPRHL2	NM_017825	1	0	36327072	36332118	36327092	36331573	0.668988	8.79042	5.06354	0.000199	0.00132	0.154224	-0.00166667	8.85581	-0.00618326	0.995	0.99823	-6.66968	2330253	0.321071	8.28501	1.98328	0.0847	0.117	-5.94047	0.39398	8.18656	4.51983	0.00138	0.00274	-1.86211	-0.302924	10.0208	-2.91445	0.0185	0.0289	-4.49148	1	0	0	0	0	1	0	1	0
55879	1296	COL8A2	NM_005202	1	1	36333432	36338436	36335756	36338429	0.0760556	5.43584	0.725395	0.481	0.693	-7.22151	-0.656072	4.87345	-0.481795	0.654	0.837176	-6.53249	2406579	-0.560869	8.88126	-1.62603	0.145	0.188	-6.44844	-0.477537	12.2308	-2.85221	0.0187	0.0289	-4.5799	-2.81446	7.46418	-2.0123	0.0773	0.106	-5.92212	0	0	1	0	1	0	0	1	0
6399	27095	TRAPPC3	NM_014408	1	1	36374761	36387653	36375390	36387565	0.402447	8.8168	5.57148	8.16e-05	0.000615	1.07736	0.653413	9.67553	2.47505	0.0646	0.321588	-4.38379	2406597	0.502588	9.96524	4.16131	0.00357	0.00724	-2.64932	0.445192	9.80714	3.46847	0.00687	0.0116	-3.55123	-0.126552	10.9626	-1.89539	0.0929	0.125	-6.09741	1	0	0	0	1	0	1	0	0
17009	55700	RPRC1	NM_018067	1	0	36394389	36419022	36394605	36418445	0.38154	8.93839	4.90661	0.000264	0.00168	-0.137376	0.711575	11.11	2.91602	0.0401	0.268903	-3.8635	2330289	0.192671	9.15461	2.05727	0.0757	0.106	-5.83089	0.184071	9.99323	1.89441	0.0901	0.12	-6.12547	-0.16671	9.58267	-1.74634	0.117	0.153	-6.31458	0	1	0	0	1	0	0	1	0
31289	9967	THRAP3	NM_005119	1	0	36462633	36542743	36520751	36542204	0.283737	7.65472	2.36503	0.0338	0.106	-4.99594	-0.172322	8.30287	-0.706087	0.517	0.752377	-6.3836	2330334	0.395971	10.687	3.54037	0.00834	0.0152	-3.55819	0.442734	11.154	4.05211	0.00277	0.0051	-2.59849	0.264145	10.5823	3.64794	0.00599	0.0106	-3.31775	1	0	0	1	0	0	1	0	0
84850	79729	C1orf113	NM_024676	1	0	36545304	36563070	36557913	36559314	-0.0171331	5.99193	-0.123844	0.903	0.955	-7.4898	1.97677	6.32489	3.19034	0.0303	0.243905	-3.55443	2330393	-0.0719853	7.31256	-0.290458	0.779	0.813	-7.68181	-0.296719	9.5748	-1.76486	0.111	0.144	-6.31757	-0.863514	8.78162	-7.77354	4.09e-05	0.000149	2.061	0	1	0	0	0	1	0	1	0
18151	55194	C1orf78	NM_018166	1	1	36560218	36562341	36560482	36561224	0.02706	7.93584	0.242463	0.812	0.908	-7.46658	0.999965	8.84501	2.56741	0.0583	0.310787	-4.27271	-1000	-1000	-1000	-1000	-1000	-1000	-1000	-1000	-1000	-1000	-1000	-1000	-1000	-1000	-1000	-1000	-1000	-1000	-1000	0	1	0	0	1	0	0	1	0
12542	83931	STK40	NM_032017	1	1	36577811	36624071	36579942	36599519	-0.515087	7.95936	-4.85976	0.000288	0.00181	-0.224974	0.621093	11.2095	1.76263	0.148	0.439482	-5.25908	2406677	-0.540243	10.1069	-4.77275	0.00164	0.00369	-1.80527	-0.702404	9.92982	-8.8781	8.44e-06	3.53e-05	3.62432	-0.730023	10.0267	-10.7166	3.46e-06	2.46e-05	4.74721	0	0	1	0	0	1	0	0	1
13154	84967	LSM10	NM_032881	1	1	36631617	36636079	36631945	36632316	-0.0189431	9.38788	-0.225106	0.825	0.915	-7.47091	-0.248404	9.68636	-0.767558	0.483	0.728668	-6.33489	2406722	0.145679	9.60864	0.787767	0.455	0.51	-7.39224	-0.0951942	8.89306	-0.60993	0.557	0.603	-7.5998	-0.65499	10.0874	-6.38661	0.000172	0.00048	0.500793	0	1	0	0	0	1	0	1	0
71010	127700	C1orf102	NM_145047	1	1	36656094	36688638	36656326	36688556	0.140582	5.47854	1.48566	0.161	0.348	-6.40375	1.08186	8.95401	3.42617	0.024	0.224653	-3.29868	2406735	0.36182	6.61256	1.5606	-1000	-1000	-1000	0.161156	6.06646	1.18165	-1000	-1000	-1000	0.308839	6.85437	2.62811	0.029	0.0437	-4.95364	0	1	0	1	0	0	0	1	0
71010	127700	C1orf102	NM_206837	1	1	36666487	36688638	36666507	36688556	0.140582	5.47854	1.48566	0.161	0.348	-6.40375	-1000	-1000	-1000	-1000	-1000	-1000	2406735	0.36182	6.61256	1.5606	-1000	-1000	-1000	0.161156	6.06646	1.18165	-1000	-1000	-1000	0.308839	6.85437	2.62811	0.029	0.0437	-4.95364	0	1	0	1	0	0	0	1	0
32636	64960	MRPS15	NM_031280	1	1	36693959	36702555	36693975	36702462	1.33747	11.2781	11.7682	1.97e-08	7.01e-07	9.74046	0.208689	11.3529	0.861582	0.435	0.691099	-6.2546	2406766	1.60846	11.2891	11.9695	3.48e-06	3.36e-05	4.93446	1.67236	11.6093	7.48152	3.41e-05	0.00011	2.11638	0.789056	11.2045	7.13599	7.71e-05	0.000248	1.37154	1	0	0	1	0	0	1	0	0
601	1441	CSF3R	NM_172313	1	1	36704231	36721095	36704283	36717683	-0.194578	7.10788	-2.37175	0.0333	0.104	-4.98392	1.88644	4.20616	1.89607	0.126	0.411154	-5.09488	2406783	-0.383348	6.96919	-3.0923	0.0159	0.0269	-4.24017	-0.287396	6.86247	-1.73232	0.117	0.151	-6.36479	6.63e-05	6.46389	0.000262218	-1000	-1000	-1000	0	1	0	0	1	0	0	0	1
601	1441	CSF3R	NM_000760	1	1	36704231	36721095	36704544	36717683	-0.194578	7.10788	-2.37175	0.0333	0.104	-4.98392	1.88644	4.20616	1.89607	0.126	0.411154	-5.09488	2406783	-0.383348	6.96919	-3.0923	0.0159	0.0269	-4.24017	-0.287396	6.86247	-1.73232	0.117	0.151	-6.36479	6.63e-05	6.46389	0.000262218	-1000	-1000	-1000	0	1	0	0	1	0	0	0	1
601	1441	CSF3R	NM_156039	1	1	36704231	36721095	36704544	36717683	-0.194578	7.10788	-2.37175	0.0333	0.104	-4.98392	1.88644	4.20616	1.89607	0.126	0.411154	-5.09488	2406783	-0.383348	6.96919	-3.0923	0.0159	0.0269	-4.24017	-0.287396	6.86247	-1.73232	0.117	0.151	-6.36479	6.63e-05	6.46389	0.000262218	-1000	-1000	-1000	0	1	0	0	1	0	0	0	1
601	1441	CSF3R	NM_156038	1	1	36704231	36721095	36704651	36717683	-0.194578	7.10788	-2.37175	0.0333	0.104	-4.98392	1.88644	4.20616	1.89607	0.126	0.411154	-5.09488	2406783	-0.383348	6.96919	-3.0923	0.0159	0.0269	-4.24017	-0.287396	6.86247	-1.73232	0.117	0.151	-6.36479	6.63e-05	6.46389	0.000262218	-1000	-1000	-1000	0	1	0	0	1	0	0	0	1
73901	2899	GRIK3	NM_000831	1	1	37039200	37272430	37040038	37272295	-0.116301	4.9882	-1.22539	0.242	0.459	-6.73568	-0.413803	5.21349	-1.09857	0.33	0.609161	-6.02556	2406926	0.702859	4.60864	2.03097	-1000	-1000	-1000	0.546076	4.7477	2.08638	-1000	-1000	-1000	0.134029	4.98918	0.394441	-1000	-1000	-1000	0	1	0	0	1	0	0	1	0
11824	80149	ZC3H12A	NM_025079	1	0	37712739	37722562	37713684	37721798	-0.965351	8.49039	-7.24059	5.58e-06	6.29e-05	3.86725	-0.214568	9.61636	-0.687195	0.527	0.75934	-6.39793	2330687	-0.590915	8.35352	-5.02073	0.00121	0.00286	-1.47817	-0.982647	8.69119	-11.8426	7.31e-07	5.8e-06	6.26154	-0.585786	8.23819	-6.22957	0.000205	0.000557	0.309452	0	0	1	0	0	1	0	0	1
11240	64769	C1orf149	NM_022756	1	1	37730762	37752950	37732286	37752933	0.203887	6.49072	3.06289	0.00882	0.0343	-3.69357	-0.390265	8.63688	-1.46037	0.214	0.511089	-5.62294	2407128	0.421042	10.1324	1.47631	0.18	0.227	-6.64735	-0.260405	8.31848	-0.916493	0.383	0.434	-7.35677	-0.597801	10.6072	-2.6945	0.0261	0.0397	-4.8467	0	1	0	0	0	1	0	1	0
110886	79753	SNIP1	NM_024700	1	1	37774731	37792489	37775935	37792416	0.207105	7.4558	2.51975	0.0252	0.083	-4.71636	0.121127	7.37037	0.331901	0.756	0.893923	-6.60367	2407163	0.581299	8.47533	1.62523	0.145	0.188	-6.44954	-0.41024	10.8082	-1.62712	0.138	0.175	-6.51431	-0.933078	8.62625	-2.54246	0.0333	0.0494	-5.09121	0	1	0	0	0	1	0	1	0
2586	7802	DNALI1	NM_003462	1	0	37795106	37805043	37795116	37803248	-0.0179828	4.96251	-0.212875	0.835	0.92	-7.47377	-0.665455	9.26921	-1.76033	0.149	0.439886	-5.2619	2330723	0.487773	5.86469	1.32242	-1000	-1000	-1000	0.235792	6.24395	1.17564	-1000	-1000	-1000	-0.187149	6.32034	-0.88272	-1000	-1000	-1000	0	1	0	0	1	0	0	1	0
6858	29889	GNL2	NM_013285	1	1	37805004	37834082	37805042	37834009	1.4071	9.21019	9.63135	2.2e-07	4.51e-06	7.23837	-1.05969	11.6985	-4.11975	0.0128	0.183247	-2.60138	2407191	1.21058	11.7388	9.32667	2.06e-05	0.00011	2.99336	0.943337	10.9617	7.21941	4.52e-05	0.000139	1.80987	0.70815	11.0116	8.03252	3.2e-05	0.000123	2.32862	1	0	0	1	0	0	1	0	0
52148	284654	RSPO1	NM_001038633	1	1	37849537	37873077	37851013	37867919	0.0879267	6.4709	1.16691	0.264	0.485	-6.80336	-1.25585	5.6358	-2.26635	0.0818	0.348491	-4.638	2407224	-0.0893483	6.75885	-0.352617	-1000	-1000	-1000	-0.316543	6.85507	-2.7342	0.0227	0.0345	-4.7768	0.00098075	6.39334	0.00354672	-1000	-1000	-1000	0	0	1	0	1	0	0	1	0
23053	54955	C1orf109	NM_017850	1	1	37919836	37928778	37921381	37928138	1.70623	7.54238	9.7529	1.89e-07	4.02e-06	7.3924	-0.817115	9.23436	-3.53402	0.0216	0.216866	-3.18488	-1000	-1000	-1000	-1000	-1000	-1000	-1000	-1000	-1000	-1000	-1000	-1000	-1000	-1000	-1000	-1000	-1000	-1000	-1000	0	1	0	0	1	0	0	1	0
23075	55143	CDCA8	NM_018101	1	0	37930745	37947975	37930949	37946624	0.901362	9.84934	10.6797	6.4e-08	1.71e-06	8.51848	-0.207535	11.8762	-0.600246	0.579	0.790884	-6.45978	2330773	1.40251	9.31114	10.0725	1.2e-05	7.55e-05	3.58787	1.48547	8.67145	11.678	8.25e-07	6.27e-06	6.13147	1.26137	9.3195	20.9831	1.49e-08	1.08e-06	10.5196	1	0	0	1	0	0	1	0	0
67804	284656	EPHA10	NM_001004338	1	1	37952147	37994949	37954130	37969816	-1000	-1000	-1000	-1000	-1000	-1000	-1000	-1000	-1000	-1000	-1000	-1000	-1000	-1000	-1000	-1000	-1000	-1000	-1000	-1000	-1000	-1000	-1000	-1000	-1000	-1000	-1000	-1000	-1000	-1000	-1000	0	1	0	0	1	0	0	1	0
67804	284656	EPHA10	NM_173641	1	1	37998544	38003375	37999625	38003324	0.102779	7.02418	1.05587	0.31	0.536	-6.92436	-0.668115	6.30158	-1.54519	0.193	0.488452	-5.52251	2407359	0.777869	6.52058	3.1069	-1000	-1000	-1000	0.74131	6.20773	2.70317	-1000	-1000	-1000	2.16114	5.84321	3.68421	-1000	-1000	-1000	0	1	0	0	1	0	0	1	0
-1	149175	MANEAL	NM_001031740	1	0	38032360	38039389	38032441	38038117	1.4528	8.20156	13.5294	3.49e-09	1.99e-07	11.5193	-0.300219	7.38214	-0.371078	0.728	0.880035	-6.58742	2330843	1.27255	8.98728	12.0148	3.39e-06	3.31e-05	4.96401	1.24201	9.16094	8.23696	1.56e-05	5.8e-05	2.95699	1.21375	8.7882	8.44488	2.19e-05	9.25e-05	2.74087	1	0	0	1	0	0	1	0	0
-1	149175	MANEAL	NM_152496	1	0	38033746	38039806	38034034	38038461	1.4528	8.20156	13.5294	3.49e-09	1.99e-07	11.5193	-0.300219	7.38214	-0.371078	0.728	0.880035	-6.58742	2330843	1.27255	8.98728	12.0148	3.39e-06	3.31e-05	4.96401	1.24201	9.16094	8.23696	1.56e-05	5.8e-05	2.95699	1.21375	8.7882	8.44488	2.19e-05	9.25e-05	2.74087	1	0	0	1	0	0	1	0	0
11635	79693	YRDC	NM_024640	1	1	38041200	38046451	38042183	38046438	1.5495	8.77313	13.3565	4.1e-09	2.23e-07	11.3544	-0.370741	11.2983	-1.58085	0.185	0.479494	-5.47983	2407392	1.46775	9.36759	14.5146	8.55e-07	1.45e-05	6.44695	1.24816	9.88253	9.49465	4.82e-06	2.3e-05	4.22983	1.1494	9.20368	10.2098	5.06e-06	3.19e-05	4.3344	1	0	0	1	0	0	1	0	0
-1	127687	C1orf122	NM_198446	1	0	38046555	38047712	38046668	38047474	-0.0666699	8.79593	-0.837689	0.417	0.64	-7.1316	0.134019	11.5452	0.526059	0.625	0.821023	-6.50695	2407392	1.46775	9.36759	14.5146	8.55e-07	1.45e-05	6.44695	1.24816	9.88253	9.49465	4.82e-06	2.3e-05	4.22983	1.1494	9.20368	10.2098	5.06e-06	3.19e-05	4.3344	1	0	0	1	0	0	1	0	0
4347	4520	MTF1	NM_005955	1	1	38047826	38097878	38053394	38095916	-0.115347	8.3028	-1.79565	0.0952	0.238	-5.9509	-0.243545	9.78746	-0.949827	0.393	0.658275	-6.17344	-1000	-1000	-1000	-1000	-1000	-1000	-1000	-1000	-1000	-1000	-1000	-1000	-1000	-1000	-1000	-1000	-1000	-1000	-1000	0	1	0	0	1	0	0	1	0
69021	3633	INPP5B	NM_005540	1	1	38098955	38185315	38100573	38184566	-0.950115	8.17235	-11.6643	2.19e-08	7.64e-07	9.62816	0.285295	4.94375	0.904301	0.414	0.675787	-6.21597	4043943	-1.20841	11.0329	-11.4973	4.65e-06	4.05e-05	4.6192	-1.39352	10.9369	-12.8321	3.64e-07	3.59e-06	7.00936	-1.17152	10.2369	-12.1726	1.26e-06	1.28e-05	5.84054	0	0	1	0	0	1	0	0	1
4949	10946	SF3A3	NM_006802	1	1	38195240	38228347	38196444	38228223	1.28355	8.87918	18.5759	6.17e-11	1.33e-08	15.5937	-0.926431	11.9865	-3.89096	0.0156	0.195513	-2.82241	2407439	1.37455	10.997	13.2178	1.69e-06	2.12e-05	5.71271	0.856938	9.80171	6.45108	0.000109	0.000292	0.863611	0.548326	11.0294	6.59955	0.000136	0.000396	0.755215	1	0	0	1	0	0	1	0	0
37928	2275	FHL3	NM_004468	1	1	38235030	38243820	38235663	38237670	0.234311	7.61651	3.58296	0.0032	0.0144	-2.68299	-0.171655	7.29933	-0.70752	0.516	0.751739	-6.3825	2407478	1.11045	7.67235	7.41221	0.0001	0.000366	1.25494	1.00826	7.34702	4.26358	0.00201	0.00383	-2.26218	0.89995	8.31713	9.09568	1.24e-05	6.07e-05	3.35899	1	0	0	1	0	0	1	0	0
6349	51118	UTP11L	NM_016037	1	0	38251000	38262077	38251061	38261886	1.52415	9.43677	22.4022	5.42e-12	3.37e-09	17.9693	-0.864149	10.1058	-3.71159	0.0183	0.207393	-3.00184	2330899	1.66246	10.2925	12.9785	1.94e-06	2.28e-05	5.56929	1.19258	8.92266	8.62761	1.07e-05	4.26e-05	3.36836	0.945604	10.3362	8.63717	1.85e-05	8.12e-05	2.92751	1	0	0	1	0	0	1	0	0
20590	5453	POU3F1	NM_002699	1	1	38282109	38285036	38283646	38285001	-0.190326	6.92696	-1.8642	0.0844	0.218	-5.8435	-0.589214	3.62447	-1.49076	0.206	0.502525	-5.58715	2407496	-0.300729	7.63985	-1.28992	0.235	0.287	-6.8796	-0.0564547	8.33903	-0.339546	0.742	0.777	-7.73825	-0.209667	8.05659	-2.00091	0.0787	0.108	-5.93936	0	1	0	0	1	0	0	1	0
39141	64121	RRAGC	NM_022157	1	1	39077607	39097926	39077811	39097904	-0.423196	9.41227	-3.44644	0.00418	0.0181	-2.94949	1.13671	10.6592	3.02992	0.0356	0.257937	-3.73369	2407729	-0.438652	9.85466	-3.74829	0.00624	0.0118	-3.24855	-0.386736	8.93527	-3.05284	0.0134	0.0214	-4.24428	-0.482866	9.91516	-4.68078	0.00138	0.0029	-1.75699	0	0	1	0	0	1	0	0	1
49312	26292	MYCBP	NM_012333	1	1	39101223	39111636	39102928	39111563	1.33106	8.70163	14.2672	1.79e-09	1.22e-07	12.201	0.139202	9.586	0.466181	0.664	0.84324	-6.54102	2407755	1.02782	4.82457	3.62132	-1000	-1000	-1000	-0.183691	4.15754	-0.519755	-1000	-1000	-1000	-0.559056	4.20165	-1.06286	-1000	-1000	-1000	0	1	0	0	1	0	0	1	0
101697	81025	GJA10	NM_030772	1	1	39112325	39119875	39112809	39114356	0.128128	6.31578	1.5463	0.145	0.325	-6.31975	-0.217954	3.75951	-0.861371	0.435	0.691109	-6.25479	2407755	1.02782	4.82457	3.62132	-1000	-1000	-1000	-0.183691	4.15754	-0.519755	-1000	-1000	-1000	-0.559056	4.20165	-1.06286	-1000	-1000	-1000	0	1	0	0	1	0	0	1	0
49508	54933	RHBDL2	NM_017821	1	1	39124065	39180042	39124762	39157470	0.0713309	6.40737	1.10434	0.289	0.514	-6.87278	-0.442543	2.85152	-1.06042	0.345	0.620695	-6.06469	2407786	0.0982807	4.75122	0.169576	-1000	-1000	-1000	-0.330427	4.10756	-1.43554	-1000	-1000	-1000	0.883853	4.71185	1.40268	-1000	-1000	-1000	0	1	0	0	1	0	0	1	0
11348	79647	C1orf108	NM_024595	1	0	39229503	39243565	39229639	39242313	-0.238465	9.47145	-1.75711	0.102	0.25	-6.01021	-0.997765	10.863	-2.39646	0.0705	0.331349	-4.47905	2331158	-0.069559	10.8267	-0.576609	0.581	0.63	-7.54537	-0.313092	9.73303	-2.27541	0.0484	0.0687	-5.5302	-0.410461	10.4575	-3.98427	0.00366	0.00676	-2.79489	0	1	0	0	0	1	0	1	0
3347	4725	NDUFS5	NM_004552	1	0	39264592	39272872	39266983	39272754	1.32336	11.5231	13.0876	5.28e-09	2.66e-07	11.094	-0.504204	14.841	-2.24982	0.0834	0.35094	-4.65829	2331178	1.65069	11.3565	7.1127	0.000132	0.000455	0.950651	1.68664	9.72521	7.6584	2.82e-05	9.45e-05	2.31879	0.59385	12.3409	7.64238	4.65e-05	0.000165	1.92279	1	0	0	1	0	0	1	0	0
113798	23499	MACF1	NM_012090	1	0	39319704	39725375	39322477	39724052	-0.417552	5.12608	-2.44052	0.0293	0.094	-4.86035	-0.19304	8.62816	-0.502466	0.64	0.829253	-6.52081	2331213	-0.425531	11.3992	-2.57858	0.0342	0.0527	-5.03544	-0.389128	11.3197	-5.38084	0.000417	0.000943	-0.583051	-0.28503	9.57834	-3.75753	0.00509	0.00913	-3.14602	0	0	1	0	0	1	0	1	0
113798	23499	MACF1	NM_033044	1	0	39569396	39725375	39569527	39724052	-0.417552	5.12608	-2.44052	0.0293	0.094	-4.86035	-0.0734543	9.61691	-0.169812	0.873	0.950117	-6.65225	2331213	-0.425531	11.3992	-2.57858	0.0342	0.0527	-5.03544	-0.389128	11.3197	-5.38084	0.000417	0.000943	-0.583051	-0.28503	9.57834	-3.75753	0.00509	0.00913	-3.14602	0	0	1	0	0	1	0	1	0
74865	353500	BMP8A	NM_181809	1	0	39729904	39768125	39730250	39764056	-0.0945304	7.27492	-1.21335	0.246	0.464	-6.74983	-0.829634	2.41054	-1.66857	0.166	0.459521	-5.37388	2331511	0.453723	6.26099	1.97999	-1000	-1000	-1000	0.419537	6.13862	2.61119	-1000	-1000	-1000	0.345959	6.26992	1.40942	-1000	-1000	-1000	0	1	0	0	1	0	0	1	0
37855	8761	PABPC4	NM_003819	1	1	39799074	39815002	39799956	39814209	1.36876	10.3264	9.60189	2.28e-07	4.64e-06	7.20081	-0.949239	9.01481	-2.57495	0.0578	0.309799	-4.26369	2407934	1.04305	10.5729	10.2502	1.06e-05	6.9e-05	3.72365	1.01535	10.5668	9.19456	6.31e-06	2.83e-05	3.93934	0.771172	10.487	9.05278	1.29e-05	6.23e-05	3.31941	1	0	0	1	0	0	1	0	0
8494	26508	HEYL	NM_014571	1	1	39861690	39877934	39864765	39877883	0.133259	6.87725	2.27436	0.04	0.121	-5.15643	-1.47973	4.78774	-3.59564	0.0204	0.213217	-3.12075	2407985	0.063052	6.49368	0.260341	-1000	-1000	-1000	0.039303	6.44624	0.27738	-1000	-1000	-1000	0.229128	6.21296	1.17221	-1000	-1000	-1000	0	1	0	0	1	0	0	1	0
57173	84618	NT5C1A	NM_032526	1	1	39897379	39910296	39897379	39910296	-0.192043	6.64631	-2.501	0.0261	0.0855	-4.75059	0.194888	5.8525	0.39291	0.713	0.872132	-6.57763	2408028	-0.088612	6.2054	-0.185529	-1000	-1000	-1000	-0.137336	5.90082	-0.456672	-1000	-1000	-1000	-0.0847202	6.59665	-0.211831	-1000	-1000	-1000	0	1	0	0	1	0	0	1	0
9441	51440	HPCAL4	NM_016257	1	1	39917238	39929675	39920794	39922861	0.189936	6.78483	2.01034	0.065	0.178	-5.60688	-0.339181	2.54564	-1.21791	0.286	0.574523	-5.89849	2408041	0.403968	5.98832	1.0374	-1000	-1000	-1000	-0.212091	6.16871	-0.465401	-1000	-1000	-1000	-0.447199	5.83787	-1.77058	-1000	-1000	-1000	0	1	0	0	1	0	0	1	0
38142	10450	PPIE	NM_006112	1	0	39977116	39991964	39977159	39991613	0.340632	9.01584	4.05885	0.00128	0.00653	-1.75523	-0.0268903	8.01868	-0.0837138	0.937	0.977541	-6.66545	2331602	0.340877	9.35544	2.46629	0.0406	0.0611	-5.209	0.424081	8.33945	2.14213	0.0603	0.0838	-5.74272	-0.001008	10.1686	-0.00843457	0.993	0.995	-7.7673	0	1	0	0	1	0	0	1	0
38142	10450	PPIE	NM_203457	1	0	39977116	39991964	39980177	39991613	0.340632	9.01584	4.05885	0.00128	0.00653	-1.75523	-0.0268903	8.01868	-0.0837138	0.937	0.977541	-6.66545	2331602	0.340877	9.35544	2.46629	0.0406	0.0611	-5.209	0.424081	8.33945	2.14213	0.0603	0.0838	-5.74272	-0.001008	10.1686	-0.00843457	0.993	0.995	-7.7673	0	1	0	0	1	0	0	1	0
38142	10450	PPIE	NM_203456	1	0	39977116	40002171	39977159	40002000	0.340632	9.01584	4.05885	0.00128	0.00653	-1.75523	-0.0268903	8.01868	-0.0837138	0.937	0.977541	-6.66545	2331602	0.340877	9.35544	2.46629	0.0406	0.0611	-5.209	0.424081	8.33945	2.14213	0.0603	0.0838	-5.74272	-0.001008	10.1686	-0.00843457	0.993	0.995	-7.7673	0	1	0	0	1	0	0	1	0
74405	656	BMP8B	NM_001720	1	1	39996489	40027119	39998677	40026743	0.1469	6.58387	1.56049	0.142	0.319	-6.29974	-1.30468	3.25838	-5.82947	0.00351	0.136168	-1.20202	2331511	0.453723	6.26099	1.97999	-1000	-1000	-1000	0.419537	6.13862	2.61119	-1000	-1000	-1000	0.345959	6.26992	1.40942	-1000	-1000	-1000	0	1	0	0	1	0	0	1	0
75173	64064	OXCT2	NM_022120	1	1	40007784	40009606	40007960	40009513	0.178449	6.2972	1.69	0.114	0.273	-6.11156	-1.9436	4.73953	-2.42902	0.068	0.328144	-4.4395	2331548	0.223375	7.79031	1.75523	0.119	0.159	-6.26948	-0.147123	8.15166	-0.873215	0.405	0.456	-7.3962	-0.639496	10.8782	-4.87065	0.00108	0.00233	-1.48557	0	1	0	0	0	1	0	1	0
7010	54802	TRIT1	NM_017646	1	1	40079314	40121763	40080002	40121749	0.981986	8.59995	9.83016	1.72e-07	3.75e-06	7.48951	-0.471948	10.3402	-1.97103	0.115	0.39586	-5.00227	2408111	1.37189	9.74329	12.539	2.49e-06	2.69e-05	5.29897	0.872536	8.96719	6.76206	7.56e-05	0.000215	1.25545	1.18685	9.46078	10.571	3.85e-06	2.65e-05	4.63052	1	0	0	1	0	0	1	0	0
3921	4610	MYCL1	NM_001033081	1	1	40133684	40140273	40135630	40139692	0.134667	6.00669	2.16036	0.0494	0.144	-5.35422	-1000	-1000	-1000	-1000	-1000	-1000	2408146	0.28186	7.68343	1.76496	0.118	0.157	-6.25575	-0.0109465	7.43679	-0.0884489	0.931	0.943	-7.79735	0.032304	8.0822	0.253442	0.806	0.837	-7.7316	0	1	0	0	1	0	0	1	0
3921	4610	MYCL1	NM_001033082	1	1	40133684	40140273	40135630	40139692	0.134667	6.00669	2.16036	0.0494	0.144	-5.35422	-1000	-1000	-1000	-1000	-1000	-1000	2408146	0.28186	7.68343	1.76496	0.118	0.157	-6.25575	-0.0109465	7.43679	-0.0884489	0.931	0.943	-7.79735	0.032304	8.0822	0.253442	0.806	0.837	-7.7316	0	1	0	0	1	0	0	1	0
3921	4610	MYCL1	NM_005376	1	1	40137872	40140273	40139072	40139692	0.134667	6.00669	2.16036	0.0494	0.144	-5.35422	-0.94845	5.98178	-1.9697	0.116	0.396065	-5.00392	2408146	0.28186	7.68343	1.76496	0.118	0.157	-6.25575	-0.0109465	7.43679	-0.0884489	0.931	0.943	-7.79735	0.032304	8.0822	0.253442	0.806	0.837	-7.7316	0	1	0	0	1	0	0	1	0
19229	84879	MFSD2	NM_032793	1	0	40193396	40208213	40193551	40207826	0.108036	7.43614	1.25106	0.232	0.446	-6.70513	-0.932568	5.17578	-1.83271	0.136	0.42433	-5.173	2331679	0.623584	8.08426	3.81367	0.0057	0.0109	-3.15222	-0.147608	8.97567	-1.19002	0.264	0.313	-7.07271	0.093798	7.78873	0.739309	0.48	0.535	-7.4716	0	1	0	0	1	0	1	0	0
74572	10487	CAP1	NM_006367	1	0	40279014	40310906	40297605	40309791	-0.874766	11.1532	-10.1634	1.16e-07	2.72e-06	7.90153	0.093324	10.7936	0.370874	0.728	0.880056	-6.58751	2331727	-0.840635	12.58	-6.87688	0.000166	0.000543	0.704077	-1.16391	12.502	-13.9942	1.7e-07	2.2e-06	7.82048	-0.961894	12.2021	-12.4213	1.07e-06	1.15e-05	6.01487	0	0	1	0	0	1	0	0	1
7488	5538	PPT1	NM_000310	1	1	40310970	40335554	40312319	40335496	1.19641	10.5149	14.6402	1.29e-09	9.71e-08	12.5329	-0.665663	9.61116	-2.14857	0.0937	0.366925	-4.78291	2408189	1.45331	11.4847	10.3735	9.71e-06	6.5e-05	3.8166	0.812237	10.8165	5.97509	0.000194	0.000481	0.239437	0.530302	11.2471	5.20404	0.0007	0.0016	-1.02137	1	0	0	1	0	0	1	0	0
8243	6018	RLF	NM_012421	1	0	40399647	40479177	40399658	40478705	-0.114587	7.61966	-0.992135	0.339	0.566	-6.98919	0.00648233	9.87358	0.0250663	0.981	0.993075	-6.66932	2331771	-0.439306	10.4727	-4.23959	0.00322	0.00662	-2.53832	-0.61038	9.91435	-6.38496	0.000118	0.000312	0.778703	-0.396234	9.93604	-5.87909	0.000307	0.000784	-0.129232	0	0	1	0	0	1	0	0	1
77950	127391	TMCO2	NM_001008740	1	0	40486159	40489949	40486252	40489852	-0.214412	6.07831	-1.89873	0.0794	0.208	-5.7885	-0.0557817	4.29826	-0.187964	0.859	0.943479	-6.64834	-1000	-1000	-1000	-1000	-1000	-1000	-1000	-1000	-1000	-1000	-1000	-1000	-1000	-1000	-1000	-1000	-1000	-1000	-1000	0	1	0	0	1	0	0	1	0
4277	10269	ZMPSTE24	NM_005857	1	0	40496365	40532437	40496530	40530927	0.933057	9.70474	12.1721	1.3e-08	5.09e-07	10.1688	0.197401	11.6679	0.457056	0.67	0.84653	-6.54589	2331822	1.05121	11.0573	8.80616	3.08e-05	0.000146	2.55299	0.464096	10.138	4.49443	0.00143	0.00284	-1.90138	0.621915	10.2944	7.78753	4.04e-05	0.000147	2.07564	1	0	0	1	0	0	1	0	0
37535	1298	COL9A2	NM_001852	1	1	40538749	40555525	40539440	40555455	-1.19857	7.94366	-6.82032	1.06e-05	0.000108	3.20055	1.24539	6.58552	3.84456	0.0162	0.198207	-2.8683	2408244	-0.418224	7.97519	-3.0131	0.0179	0.0298	-4.3623	-0.952757	9.75288	-8.97702	7.7e-06	3.28e-05	3.72377	-0.832525	8.14174	-12.8408	8.19e-07	9.69e-06	6.30151	0	0	1	0	0	1	0	0	1
41489	64744	SMAP1L	NM_022733	1	0	40612314	40661578	40612379	40660359	-0.959224	9.8463	-12.7659	7.2e-09	3.36e-07	10.7758	0.892168	5.12731	1.77848	0.145	0.436423	-5.23964	2331857	-0.885593	11.1341	-8.91596	2.82e-05	0.000136	2.64775	-0.928622	10.7716	-7.99733	1.99e-05	7.01e-05	2.69698	-0.93309	10.9904	-10.9381	2.94e-06	2.24e-05	4.92211	0	0	1	0	0	1	0	0	1
56963	65243	ZNF643	NM_023070	1	0	40688365	40701938	40695296	40701847	0.349002	4.46355	3.64432	0.00285	0.013	-2.56316	-2.05469	7.06528	-5.67005	0.0039	0.138689	-1.3156	2331903	0.674938	9.0182	2.23502	0.0577	0.0834	-5.56334	0.0956952	9.68187	0.489662	0.636	0.678	-7.67065	0.178154	8.41026	0.81196	0.439	0.495	-7.41287	0	1	0	0	1	0	0	1	0
45693	339559	ZNF642	NM_198494	1	0	40715888	40734600	40717620	40734317	0.404923	5.05194	4.20321	0.000974	0.00516	-1.4756	-0.524035	6.21288	-2.29782	0.0789	0.344048	-4.59943	2331937	0.604316	7.50729	3.99199	0.00448	0.00881	-2.89228	0.606788	6.98902	2.86339	0.0183	0.0284	-4.56122	-0.464267	9.48603	-3.58569	0.00658	0.0115	-3.41585	1	0	0	0	0	1	1	0	0
41497	64789	C1orf176	NM_022774	1	0	40747019	40754798	40752803	40753924	-0.201441	4.44894	-2.20433	0.0456	0.134	-5.27849	-0.617072	8.11804	-2.40984	0.0695	0.330223	-4.46278	2331959	1.4468	6.19172	2.08861	-1000	-1000	-1000	-0.206164	7.65005	-0.594884	0.566	0.612	-7.60945	0.189759	5.82968	0.443397	-1000	-1000	-1000	0	1	0	0	1	0	0	1	0
65042	127396	ZNF684	NM_152373	1	0	40769819	40786425	40771425	40785718	0.126392	4.69261	1.14948	0.271	0.493	-6.82302	-0.247159	6.33976	-0.458589	0.669	0.845907	-6.54508	2331974	0.31505	7.81754	2.47999	0.0398	0.06	-5.18786	0.286574	7.36686	1.85818	0.0955	0.127	-6.17982	0.346623	6.69896	0.867593	-1000	-1000	-1000	0	1	0	0	1	0	0	1	0
8837	9783	RIMS3	NM_014747	1	1	40858938	40903910	40864775	40880183	0.0488744	7.73264	0.329626	0.747	0.872	-7.44003	-0.653101	8.7984	-1.55627	0.19	0.485743	-5.50927	2408351	0.290283	7.52009	2.81016	0.0242	0.0388	-4.67641	0.447684	7.18652	2.23644	0.0516	0.0729	-5.59274	0.750107	7.05081	3.68269	0.00569	0.0101	-3.26316	0	1	0	1	0	0	1	0	0
7440	4802	NFYC	NM_014223	1	0	40929951	41009859	40977102	41009086	-0.438528	9.08151	-6.1866	2.9e-05	0.000253	2.14982	-0.295247	8.70377	-1.05799	0.346	0.621335	-6.06716	2332013	-0.46474	11.1198	-4.32545	0.00288	0.006	-2.41755	-0.691681	10.3702	-8.31096	1.45e-05	5.47e-05	3.03609	-0.621342	10.5072	-9.78611	7.05e-06	4.06e-05	3.97497	0	0	1	0	0	1	0	0	1
78107	9132	KCNQ4	NM_004700	1	0	41022270	41076946	41022352	41076781	1.03621	5.86623	8.32391	1.19e-06	1.76e-05	5.47953	-0.738596	5.81934	-2.78367	0.0461	0.283645	-4.01682	2332091	2.52972	5.4685	3.94711	-1000	-1000	-1000	2.00703	6.51054	3.46127	0.00695	0.0117	-3.56316	2.50275	5.24332	2.23541	-1000	-1000	-1000	1	0	0	0	1	0	0	1	0
78107	9132	KCNQ4	NM_172163	1	0	41022270	41076946	41022352	41076781	1.03621	5.86623	8.32391	1.19e-06	1.76e-05	5.47953	-0.738596	5.81934	-2.78367	0.0461	0.283645	-4.01682	2332091	2.52972	5.4685	3.94711	-1000	-1000	-1000	2.00703	6.51054	3.46127	0.00695	0.0117	-3.56316	2.50275	5.24332	2.23541	-1000	-1000	-1000	1	0	0	0	1	0	0	1	0
10474	163732	CITED4	NM_133467	1	1	41099315	41100604	41099831	41100385	-0.0297975	7.12145	-0.304219	0.766	0.883	-7.44859	-0.275476	10.7071	-0.842933	0.444	0.698457	-6.27106	2408437	0.940622	5.10279	1.42086	-1000	-1000	-1000	-0.0403533	5.30164	-0.197099	-1000	-1000	-1000	2.00219	6.23002	1.46416	0.18	0.225	-6.70113	0	1	0	0	1	0	0	1	0
20446	1503	CTPS	NM_001905	1	0	41218029	41250814	41221549	41248503	2.28823	9.26693	24.7567	1.47e-12	1.87e-09	19.2119	-0.121763	11.6245	-0.428385	0.689	0.858355	-6.56062	2332144	2.24196	10.5817	20.9614	5.64e-08	4.13e-06	9.28933	1.89531	10.0634	20.0174	7.05e-09	3.52e-07	11.1657	1.92072	10.0044	20.9028	1.53e-08	1.09e-06	10.4873	1	0	0	1	0	0	1	0	0
44913	200172	SLFNL1	NM_144990	1	1	41253855	41259973	41254364	41258918	0.371363	5.21978	4.61996	0.000447	0.00263	-0.677059	0.0125707	4.1733	0.0202018	0.985	0.994668	-6.66945	2408477	-0.00283767	6.82187	-0.0114618	-1000	-1000	-1000	0.0487433	7.05129	0.422715	0.682	0.722	-7.70371	0.205296	6.699	0.930897	-1000	-1000	-1000	0	1	0	0	1	0	0	1	0
32146	22955	SCMH1	NM_001031694	1	1	41265461	41399632	41266452	41390932	0.608245	8.12521	9.00238	4.84e-07	8.51e-06	6.41622	0.734266	5.63999	2.90061	0.0407	0.270457	-3.88121	2408499	0.72388	10.4545	5.30947	0.000865	0.00213	-1.10836	0.35702	10.9153	4.42172	0.00159	0.00312	-2.01428	0.656561	9.65803	9.19439	1.14e-05	5.78e-05	3.44947	1	0	0	1	0	0	1	0	0
32146	22955	SCMH1	NM_012236	1	1	41265463	41480374	41266452	41397988	0.608245	8.12521	9.00238	4.84e-07	8.51e-06	6.41622	0.734266	5.63999	2.90061	0.0407	0.270457	-3.88121	2408499	0.72388	10.4545	5.30947	0.000865	0.00213	-1.10836	0.35702	10.9153	4.42172	0.00159	0.00312	-2.01428	0.656561	9.65803	9.19439	1.14e-05	5.78e-05	3.44947	1	0	0	1	0	0	1	0	0
1477	1907	EDN2	NM_001956	1	1	41717035	41722883	41717666	41722858	-0.0410549	6.42955	-0.619419	0.546	0.742	-7.29534	0.990028	4.30486	0.951847	0.392	0.657627	-6.17152	2408643	-0.0104343	7.1033	-0.0460785	0.964	0.971	-7.72802	-0.283245	7.62613	-3.30015	0.009	0.0148	-3.83104	0.00995975	7.32081	0.0404604	0.969	0.974	-7.76643	0	0	1	0	1	0	0	1	0
7803	59269	HIVEP3	NM_024503	1	1	41748271	42156781	41748708	41823054	-0.923795	6.25771	-4.92004	0.000258	0.00165	-0.112303	-0.278922	7.23867	-0.900203	0.416	0.677077	-6.21973	2408681	-0.987914	8.38997	-5.62547	0.000605	0.00158	-0.717017	-1.48045	9.25298	-13.3768	2.53e-07	2.81e-06	7.39803	-0.918482	8.18426	-11.1492	2.53e-06	2.02e-05	5.08584	0	0	1	0	0	1	0	0	1
5150	2981	GUCA2B	NM_007102	1	0	42391678	42394081	42391708	42393853	0.034521	5.19889	0.41351	0.686	0.834	-7.40698	-0.29688	5.40789	-1.02025	0.362	0.634289	-6.10503	2332481	-0.0743557	8.11673	-0.402332	0.699	0.739	-7.63872	-0.606817	8.38948	-2.34577	0.0431	0.0618	-5.41656	-0.364172	8.16133	-2.09449	0.0679	0.0942	-5.79672	0	1	0	0	1	0	0	1	0
7352	2980	GUCA2A	NM_033553	1	1	42400948	42402981	42401163	42402969	-0.00019605	7.29358	-0.00184559	0.999	1	-7.49801	0.143259	4.15306	0.271329	0.799	0.915016	-6.62538	2408832	0.342905	6.47313	1.25701	-1000	-1000	-1000	-0.308959	7.716	-1.80969	0.103	0.136	-6.25181	-0.272778	6.77859	-1.19684	-1000	-1000	-1000	0	1	0	0	1	0	0	1	0
35243	22887	FOXJ3	NM_014947	1	1	42414797	42573489	42417967	42549350	0.311092	9.21405	4.84154	0.000297	0.00186	-0.259107	0.188992	10.4518	0.80522	0.463	0.713626	-6.30354	2408855	0.237482	10.7855	1.31402	0.227	0.278	-6.85065	-0.059369	10.4257	-0.776189	0.457	0.507	-7.47865	0.137879	9.87428	1.81517	0.105	0.139	-6.21525	0	1	0	0	1	0	0	1	0
18336	284716	FAM80A	NM_173642	1	0	42619068	42653429	42619315	42653231	0.125503	4.07088	1.50569	0.155	0.341	-6.37627	-3.40124	6.66337	-9.39831	0.000518	0.10927	0.696231	2332528	-0.0652137	5.84042	-0.248244	-1000	-1000	-1000	0.259096	5.58289	1.09576	-1000	-1000	-1000	0.034988	5.93945	0.12649	-1000	-1000	-1000	0	1	0	0	1	0	0	1	0
12993	84217	ZMYND12	NM_032257	1	1	42668681	42694513	42668993	42694254	-0.0377203	5.38105	-0.561936	0.583	0.768	-7.3308	-0.936701	4.28123	-3.48319	0.0227	0.220908	-3.23827	2408929	-0.363641	5.31179	-1.30547	-1000	-1000	-1000	-0.398659	5.25411	-2.82976	-1000	-1000	-1000	-0.235966	5.38164	-0.81831	-1000	-1000	-1000	0	1	0	0	1	0	0	1	0
6173	79717	PPCS	NM_024664	1	0	42694759	42698671	42694823	42698183	-0.963599	7.99594	-8.42434	1.04e-06	1.57e-05	5.62159	0.901909	10.8396	3.3604	0.0256	0.229298	-3.36906	2332566	-1.03365	9.83958	-9.5327	1.77e-05	9.87e-05	3.16173	-0.932146	10.0502	-9.30924	5.69e-06	2.61e-05	4.05128	-1.33578	10.194	-18.6794	3.88e-08	1.69e-06	9.53206	0	0	1	0	0	1	0	0	1
-1	-1	PPCS	NM_001077447	1	0	42694759	42698671	42695515	42698183	-1000	-1000	-1000	-1000	-1000	-1000	0.901909	10.8396	3.3604	0.0256	0.229298	-3.36906	2332566	-1.03365	9.83958	-9.5327	1.77e-05	9.87e-05	3.16173	-0.932146	10.0502	-9.30924	5.69e-06	2.61e-05	4.05128	-1.33578	10.194	-18.6794	3.88e-08	1.69e-06	9.53206	0	0	1	0	0	1	0	0	1
38172	10465	PPIH	NM_006347	1	0	42896634	42915014	42896704	42905676	1.14016	9.39843	10.3591	9.23e-08	2.27e-06	8.13827	-0.202067	8.18333	-0.842141	0.444	0.698814	-6.27175	2332711	1.67391	10.4381	8.63779	3.52e-05	0.000162	2.40573	1.16231	10.5131	6.28997	0.000132	0.000344	0.65571	0.840535	10.7709	7.70004	4.39e-05	0.000158	1.98378	1	0	0	1	0	0	1	0	0
88707	4904	YBX1	NM_004559	1	0	42920652	42940603	42920823	42939272	1.32417	12.5329	11.3589	3.03e-08	9.76e-07	9.29282	-0.733024	12.4236	-3.04077	0.0352	0.257292	-3.72144	2332664	1.34892	12.1006	13.3195	1.6e-06	2.08e-05	5.77285	1.46622	12.5372	8.9177	8.13e-06	3.42e-05	3.66424	0.419781	12.515	4.55266	0.00165	0.00337	-1.94298	1	0	0	1	0	0	1	0	0
17528	149461	CLDN19	NM_148960	1	1	42971350	42978511	42973343	42978320	-0.0779358	6.95044	-0.760867	0.46	0.675	-7.19438	-1.23538	6.3748	-2.85422	0.0428	0.275304	-3.93476	2408994	-0.034582	7.64433	-0.195355	0.85	0.875	-7.70771	-0.689541	7.78851	-3.09813	0.0125	0.02	-4.16851	-0.319361	7.72403	-2.43111	0.0397	0.058	-5.26913	0	0	1	0	1	0	0	1	0
10509	64175	LEPRE1	NM_022356	1	1	42984632	43005269	42985169	43005228	0.0451231	8.05308	0.47556	0.642	0.807	-7.37785	-0.259844	10.9437	-1.15961	0.307	0.590853	-5.9614	2409004	0.523203	8.84428	4.96083	0.0013	0.00303	-1.55637	0.242058	10.0259	2.15994	0.0585	0.0817	-5.71456	0.258866	8.70937	2.7214	0.025	0.0382	-4.80332	0	1	0	1	0	0	1	0	0
11461	79078	C1orf50	NM_024097	1	0	43005526	43013996	43005569	43013651	-0.179272	7.30412	-2.33456	0.0358	0.111	-5.05016	-0.0393517	9.9407	-0.159779	0.88	0.953042	-6.65425	2332767	-0.110343	9.26403	-0.899929	0.396	0.454	-7.29453	-0.310511	8.90158	-2.00931	0.0748	0.102	-5.95019	-0.645355	9.68491	-4.09544	0.00312	0.00589	-2.62497	0	1	0	0	0	1	0	1	0
11546	374969	CCDC23	NM_199342	1	1	43045319	43055509	43045671	43054801	-0.863871	8.29737	-7.6499	3.06e-06	3.82e-05	4.49402	-0.496854	9.94064	-1.60758	0.179	0.473283	-5.44767	2409069	-0.921	7.28676	-4.30017	0.00298	0.00617	-2.453	-0.416731	5.62858	-1.06789	-1000	-1000	-1000	-1.34763	10.0646	-12.1808	1.25e-06	1.28e-05	5.84636	0	1	0	0	0	1	0	0	1
69257	114625	ERMAP	NM_001017922	1	0	43055362	43083246	43068706	43081489	-0.415794	5.8961	-3.68943	0.00261	0.012	-2.47504	0.151228	3.66571	0.659208	0.544	0.770094	-6.41858	2332812	-1.04054	7.65144	-6.99303	0.000148	0.000498	0.826312	-1.4833	7.65648	-20.0426	6.97e-09	3.52e-07	11.1773	-0.908882	7.24792	-3.65274	0.00595	0.0105	-3.3102	0	0	1	0	0	1	0	0	1
69257	114625	ERMAP	NM_018538	1	0	43063835	43083246	43068706	43081489	-0.415794	5.8961	-3.68943	0.00261	0.012	-2.47504	0.151228	3.66571	0.659208	0.544	0.770094	-6.41858	2332812	-1.04054	7.65144	-6.99303	0.000148	0.000498	0.826312	-1.4833	7.65648	-20.0426	6.97e-09	3.52e-07	11.1773	-0.908882	7.24792	-3.65274	0.00595	0.0105	-3.3102	0	0	1	0	0	1	0	0	1
9300	51058	ZNF691	NM_015911	1	0	43084866	43090730	43089216	43090070	0.0282081	7.40226	0.445651	0.663	0.819	-7.39239	-0.940562	7.29744	-3.8242	0.0165	0.199366	-2.88855	2332855	0.265514	8.2035	1.86603	0.101	0.137	-6.11147	0.029115	8.33567	0.308964	0.764	0.796	-7.7491	-0.169895	8.2686	-1.85911	0.0983	0.131	-6.15097	0	1	0	0	1	0	0	1	0
68520	6513	SLC2A1	NM_006516	1	1	43164105	43197087	43165298	43196908	-0.215045	8.91566	-1.58985	0.135	0.309	-6.25797	1.32836	14.0764	4.99815	0.0063	0.154131	-1.8303	2409104	-0.799193	10.5794	-8.41265	4.23e-05	0.000186	2.20493	-0.65391	11.2375	-8.71395	9.85e-06	3.99e-05	3.45726	-0.673661	10.8846	-8.49091	2.1e-05	8.95e-05	2.78586	0	0	1	0	0	1	0	0	1
4969	10969	EBNA1BP2	NM_006824	1	1	43402442	43410517	43402700	43410375	2.40645	8.99288	18.1588	8.26e-11	1.61e-08	15.3029	-0.388059	13.8947	-1.52132	0.198	0.494155	-5.55094	2409220	2.49781	9.42821	19.87	8.4e-08	4.83e-06	8.88291	2.68356	10.0397	16.2714	4.49e-08	9.72e-07	9.2337	1.65549	10.494	17.6068	6.3e-08	2.15e-06	9.02567	1	0	0	1	0	0	1	0	0
51350	149465	WDR65	NM_152498	1	0	43410612	43449135	43411011	43448341	0.0611684	5.59374	0.964849	0.352	0.579	-7.01588	0.11673	1.11265	0.487263	0.65	0.835183	-6.52944	2332999	0.345385	4.94981	1.27382	-1000	-1000	-1000	-0.271233	4.06791	-1.06897	-1000	-1000	-1000	-0.291281	4.46657	-0.626043	-1000	-1000	-1000	0	1	0	0	1	0	0	1	0
16952	128218	TMEM125	NM_144626	1	0	43508993	43512258	43510980	43511639	-0.204091	6.98891	-2.2614	0.041	0.123	-5.17913	-0.589249	10.5553	-2.26727	0.0817	0.348368	-4.63687	2333035	-0.179679	7.27542	-1.27476	0.24	0.292	-6.89765	-0.0384188	7.37755	-0.147903	0.886	0.904	-7.78958	0.0585275	7.09595	0.265076	0.797	0.829	-7.72826	0	1	0	0	1	0	0	1	0
11971	149466	C1orf210	NM_182517	1	1	43520145	43523825	43521042	43521527	-0.0630839	4.55137	-0.748919	0.467	0.681	-7.20365	0.347926	6.03707	1.13122	0.317	0.598992	-5.99148	2409275	0.0944243	7.97139	0.972006	0.361	0.419	-7.22624	0.337962	7.35297	0.94581	0.369	0.419	-7.32916	-0.701757	7.43554	-2.32292	0.0472	0.0678	-5.44068	0	1	0	0	1	0	0	1	0
3957	7075	TIE1	NM_005424	1	0	43539250	43561364	43539329	43560979	-1.34205	6.68751	-5.18696	0.00016	0.00109	0.381502	-2.1903	2.61774	-3.97606	0.0145	0.190223	-2.73917	2333051	-0.800046	7.30591	-7.84982	6.8e-05	0.00027	1.68257	-1.31433	7.94089	-16.1158	4.89e-08	1.02e-06	9.14369	-0.997422	7.76833	-8.40581	2.27e-05	9.47e-05	2.70252	0	0	1	0	0	1	0	0	1
7845	4352	MPL	NM_005373	1	0	43576061	43592720	43576106	43591029	0.0801399	5.22975	0.69984	0.496	0.704	-7.2403	-0.473195	3.76737	-2.0033	0.111	0.390395	-4.96239	2333107	0.265121	6.32591	1.10259	-1000	-1000	-1000	-0.0532985	6.32844	-0.382003	-1000	-1000	-1000	-0.0227747	6.3667	-0.0968548	-1000	-1000	-1000	0	1	0	0	1	0	0	1	0
37459	991	CDC20	NM_001255	1	0	43597214	43601457	43597473	43601386	1.54578	9.5794	8.44266	1.01e-06	1.55e-05	5.64738	-0.570798	10.1783	-2.2896	0.0797	0.345062	-4.6095	2333136	1.59802	10.2386	14.0938	1.06e-06	1.64e-05	6.21624	1.69582	10.308	15.1309	8.55e-08	1.41e-06	8.55255	1.37448	10.5565	15.7651	1.56e-07	3.56e-06	8.07449	1	0	0	1	0	0	1	0	0
41322	64834	ELOVL1	NM_022821	1	1	43601659	43606285	43602173	43603866	-0.282317	8.70986	-2.82507	0.014	0.0508	-4.14772	1.45667	10.2111	4.49915	0.00929	0.16702	-2.2537	2409310	0.053316	10.2251	0.471884	0.65	0.695	-7.60522	-0.423953	10.294	-3.82662	0.00391	0.00699	-2.96271	-0.493988	10.5585	-7.58251	4.93e-05	0.000172	1.85909	0	0	1	0	0	1	0	1	0
10560	112950	MED8	NM_052877	1	1	43622175	43628069	43622707	43625762	-0.121723	8.03005	-1.81226	0.0925	0.233	-5.9251	0.533754	7.5383	1.89551	0.126	0.411193	-5.09557	2409344	0.158649	9.72033	1.54732	0.163	0.207	-6.55425	-0.332595	8.41043	-2.34767	0.043	0.0616	-5.41347	-0.451564	10.1915	-4.65629	0.00143	0.00298	-1.79236	0	1	0	0	0	1	0	1	0
10560	112950	MED8	NM_001001651	1	1	43622175	43628069	43622707	43628021	-1000	-1000	-1000	-1000	-1000	-1000	0.533754	7.5383	1.89551	0.126	0.411193	-5.09557	-1000	-1000	-1000	-1000	-1000	-1000	-1000	-1000	-1000	-1000	-1000	-1000	-1000	-1000	-1000	-1000	-1000	-1000	-1000	0	1	0	0	1	0	0	1	0
10560	112950	MED8	NM_201542	1	1	43622175	43628069	43623299	43625762	-0.121723	8.03005	-1.81226	0.0925	0.233	-5.9251	0.183169	8.65091	0.709983	0.515	0.750573	-6.3806	2409344	0.158649	9.72033	1.54732	0.163	0.207	-6.55425	-0.332595	8.41043	-2.34767	0.043	0.0616	-5.41347	-0.451564	10.1915	-4.65629	0.00143	0.00298	-1.79236	0	1	0	0	0	1	0	1	0
10560	112950	MED8	NM_001001653	1	1	43622984	43628069	43623299	43625762	-1000	-1000	-1000	-1000	-1000	-1000	0.533754	7.5383	1.89551	0.126	0.411193	-5.09557	-1000	-1000	-1000	-1000	-1000	-1000	-1000	-1000	-1000	-1000	-1000	-1000	-1000	-1000	-1000	-1000	-1000	-1000	-1000	0	1	0	0	1	0	0	1	0
10560	112950	MED8	NM_001001654	1	1	43622984	43628069	43623299	43628021	-1000	-1000	-1000	-1000	-1000	-1000	0.533754	7.5383	1.89551	0.126	0.411193	-5.09557	-1000	-1000	-1000	-1000	-1000	-1000	-1000	-1000	-1000	-1000	-1000	-1000	-1000	-1000	-1000	-1000	-1000	-1000	-1000	0	1	0	0	1	0	0	1	0
52313	149469	C1orf84	NM_001012961	1	0	43628142	43645150	43628226	43644584	-0.026799	4.64168	-0.365017	0.721	0.856	-7.42698	-1000	-1000	-1000	-1000	-1000	-1000	2333168	-0.617718	9.33531	-4.27017	0.0031	0.00639	-2.49519	-0.908419	10.143	-9.98543	3.15e-06	1.67e-05	4.68852	-0.562493	8.45369	-4.28266	0.00239	0.00466	-2.34234	0	0	1	0	0	1	0	0	1
52313	149469	C1orf84	NM_182518	1	0	43628142	43651048	43628226	43647758	-1000	-1000	-1000	-1000	-1000	-1000	-0.652528	4.6465	-1.56402	0.188	0.483737	-5.50001	-1000	-1000	-1000	-1000	-1000	-1000	-1000	-1000	-1000	-1000	-1000	-1000	-1000	-1000	-1000	-1000	-1000	-1000	-1000	0	1	0	0	1	0	0	1	0
52313	149469	C1orf84	NM_001012960	1	0	43628142	43667746	43628226	43664714	-1000	-1000	-1000	-1000	-1000	-1000	0.315493	4.91599	1.06728	0.342	0.618613	-6.05772	-1000	-1000	-1000	-1000	-1000	-1000	-1000	-1000	-1000	-1000	-1000	-1000	-1000	-1000	-1000	-1000	-1000	-1000	-1000	0	1	0	0	1	0	0	1	0
49413	23334	KIAA0467	NM_015284	1	0	43661383	43690890	43663096	43688737	-0.783356	6.03581	-7.99579	1.87e-06	2.56e-05	5.00684	1.1293	7.8612	4.22418	0.0117	0.178565	-2.50337	-1000	-1000	-1000	-1000	-1000	-1000	-1000	-1000	-1000	-1000	-1000	-1000	-1000	-1000	-1000	-1000	-1000	-1000	-1000	0	1	0	0	1	0	0	1	0
12824	81888	HYI	NM_031207	1	1	43689415	43692504	43689495	43691734	0.073706	6.00932	1.03506	0.319	0.546	-6.9459	1.10456	9.9055	2.33035	0.076	0.339916	-4.55963	2409368	1.06325	6.07235	2.00611	-1000	-1000	-1000	-0.152688	5.94621	-0.583827	-1000	-1000	-1000	0.486569	6.47757	1.81943	-1000	-1000	-1000	0	1	0	0	1	0	0	1	0
20623	5792	PTPRF	NM_002840	1	0	43769133	43861928	43783333	43860260	0.384324	6.9831	1.71838	0.109	0.263	-6.06901	1.40992	13.7112	3.55902	0.0211	0.215484	-3.15878	2333318	1.2568	7.5529	10.1786	1.11e-05	7.14e-05	3.66921	1.55478	9.43791	9.28354	5.82e-06	2.66e-05	4.0263	1.43865	7.8921	10.6317	3.68e-06	2.57e-05	4.67935	1	0	0	1	0	0	1	0	0
20623	5792	PTPRF	NM_130440	1	0	43769133	43861928	43783333	43860260	0.384324	6.9831	1.71838	0.109	0.263	-6.06901	1.40992	13.7112	3.55902	0.0211	0.215484	-3.15878	2333318	1.2568	7.5529	10.1786	1.11e-05	7.14e-05	3.66921	1.55478	9.43791	9.28354	5.82e-06	2.66e-05	4.0263	1.43865	7.8921	10.6317	3.68e-06	2.57e-05	4.67935	1	0	0	1	0	0	1	0	0
27780	9682	JMJD2A	NM_014663	1	0	43888383	43943774	43891433	43942627	-0.473277	7.96155	-5.94055	4.36e-05	0.000359	1.72699	-1.2926	8.66956	-4.31101	0.0108	0.175056	-2.42323	2333429	-0.54636	10.5776	-4.05732	0.0041	0.00816	-2.79808	-0.611061	9.93284	-8.86413	8.55e-06	3.56e-05	3.61019	-0.356876	9.84809	-6.57915	0.000139	0.000404	0.731094	0	0	1	0	0	1	0	0	1
114389	6487	ST3GAL3	NM_174965	1	0	43945804	44169416	43974520	44168460	-0.263886	7.20734	-2.73178	0.0168	0.0591	-4.32349	-1000	-1000	-1000	-1000	-1000	-1000	2333481	-0.115768	7.67681	-1.18744	0.271	0.326	-6.9988	-0.0635855	8.38975	-0.696663	0.503	0.552	-7.53986	-0.0897955	7.4251	-0.690211	0.509	0.562	-7.50855	0	1	0	0	1	0	0	1	0
114389	6487	ST3GAL3	NM_174967	1	0	43945804	44169416	43974520	44168460	-0.263886	7.20734	-2.73178	0.0168	0.0591	-4.32349	-1000	-1000	-1000	-1000	-1000	-1000	2333481	-0.115768	7.67681	-1.18744	0.271	0.326	-6.9988	-0.0635855	8.38975	-0.696663	0.503	0.552	-7.53986	-0.0897955	7.4251	-0.690211	0.509	0.562	-7.50855	0	1	0	0	1	0	0	1	0
114389	6487	ST3GAL3	NM_174970	1	0	43945804	44169416	43974520	44168460	-0.263886	7.20734	-2.73178	0.0168	0.0591	-4.32349	-1000	-1000	-1000	-1000	-1000	-1000	2333481	-0.115768	7.67681	-1.18744	0.271	0.326	-6.9988	-0.0635855	8.38975	-0.696663	0.503	0.552	-7.53986	-0.0897955	7.4251	-0.690211	0.509	0.562	-7.50855	0	1	0	0	1	0	0	1	0
114389	6487	ST3GAL3	NM_174963	1	0	43945804	44169416	43974520	44168479	-0.263886	7.20734	-2.73178	0.0168	0.0591	-4.32349	0.22276	2.70001	0.886965	0.422	0.681677	-6.2318	2333481	-0.115768	7.67681	-1.18744	0.271	0.326	-6.9988	-0.0635855	8.38975	-0.696663	0.503	0.552	-7.53986	-0.0897955	7.4251	-0.690211	0.509	0.562	-7.50855	0	1	0	0	1	0	0	1	0
114389	6487	ST3GAL3	NM_174964	1	0	43945804	44169416	43974520	44168479	-0.263886	7.20734	-2.73178	0.0168	0.0591	-4.32349	0.22276	2.70001	0.886965	0.422	0.681677	-6.2318	2333481	-0.115768	7.67681	-1.18744	0.271	0.326	-6.9988	-0.0635855	8.38975	-0.696663	0.503	0.552	-7.53986	-0.0897955	7.4251	-0.690211	0.509	0.562	-7.50855	0	1	0	0	1	0	0	1	0
114389	6487	ST3GAL3	NM_174968	1	0	43945804	44169416	43974520	44168479	-0.263886	7.20734	-2.73178	0.0168	0.0591	-4.32349	0.22276	2.70001	0.886965	0.422	0.681677	-6.2318	2333481	-0.115768	7.67681	-1.18744	0.271	0.326	-6.9988	-0.0635855	8.38975	-0.696663	0.503	0.552	-7.53986	-0.0897955	7.4251	-0.690211	0.509	0.562	-7.50855	0	1	0	0	1	0	0	1	0
114389	6487	ST3GAL3	NM_174971	1	0	43945804	44169416	43974520	44168479	-0.263886	7.20734	-2.73178	0.0168	0.0591	-4.32349	0.22276	2.70001	0.886965	0.422	0.681677	-6.2318	2333481	-0.115768	7.67681	-1.18744	0.271	0.326	-6.9988	-0.0635855	8.38975	-0.696663	0.503	0.552	-7.53986	-0.0897955	7.4251	-0.690211	0.509	0.562	-7.50855	0	1	0	0	1	0	0	1	0
114389	6487	ST3GAL3	NM_006279	1	0	43945804	44169416	43974520	44168479	-0.263886	7.20734	-2.73178	0.0168	0.0591	-4.32349	-1000	-1000	-1000	-1000	-1000	-1000	2333481	-0.115768	7.67681	-1.18744	0.271	0.326	-6.9988	-0.0635855	8.38975	-0.696663	0.503	0.552	-7.53986	-0.0897955	7.4251	-0.690211	0.509	0.562	-7.50855	0	1	0	0	1	0	0	1	0
114389	6487	ST3GAL3	NM_174966	1	0	43945804	44169416	43974520	44168479	-0.263886	7.20734	-2.73178	0.0168	0.0591	-4.32349	-1000	-1000	-1000	-1000	-1000	-1000	2333481	-0.115768	7.67681	-1.18744	0.271	0.326	-6.9988	-0.0635855	8.38975	-0.696663	0.503	0.552	-7.53986	-0.0897955	7.4251	-0.690211	0.509	0.562	-7.50855	0	1	0	0	1	0	0	1	0
114389	6487	ST3GAL3	NM_174969	1	0	43945804	44169416	43974520	44168479	-0.263886	7.20734	-2.73178	0.0168	0.0591	-4.32349	-1000	-1000	-1000	-1000	-1000	-1000	2333481	-0.115768	7.67681	-1.18744	0.271	0.326	-6.9988	-0.0635855	8.38975	-0.696663	0.503	0.552	-7.53986	-0.0897955	7.4251	-0.690211	0.509	0.562	-7.50855	0	1	0	0	1	0	0	1	0
7631	9048	ARTN	NM_057091	1	0	44171578	44175470	44173915	44175023	0.275912	6.51615	2.97899	0.0104	0.0394	-3.85464	0.564239	7.10235	1.14186	0.313	0.596142	-5.98024	2333574	0.118402	7.313	0.593892	0.57	0.619	-7.53444	0.0235288	7.19741	0.131212	0.898	0.915	-7.79216	0.270817	6.98619	1.06482	0.317	0.372	-7.17337	0	1	0	0	1	0	0	1	0
7631	9048	ARTN	NM_003976	1	0	44173617	44175470	44173915	44175023	0.275912	6.51615	2.97899	0.0104	0.0394	-3.85464	0.564239	7.10235	1.14186	0.313	0.596142	-5.98024	2333574	0.118402	7.313	0.593892	0.57	0.619	-7.53444	0.0235288	7.19741	0.131212	0.898	0.915	-7.79216	0.270817	6.98619	1.06482	0.317	0.372	-7.17337	0	1	0	0	1	0	0	1	0
7631	9048	ARTN	NM_057090	1	0	44173887	44175470	44173915	44175023	0.275912	6.51615	2.97899	0.0104	0.0394	-3.85464	0.564239	7.10235	1.14186	0.313	0.596142	-5.98024	2333574	0.118402	7.313	0.593892	0.57	0.619	-7.53444	0.0235288	7.19741	0.131212	0.898	0.915	-7.79216	0.270817	6.98619	1.06482	0.317	0.372	-7.17337	0	1	0	0	1	0	0	1	0
7631	9048	ARTN	NM_057160	1	0	44174240	44175470	44174240	44175023	0.275912	6.51615	2.97899	0.0104	0.0394	-3.85464	0.564239	7.10235	1.14186	0.313	0.596142	-5.98024	2333574	0.118402	7.313	0.593892	0.57	0.619	-7.53444	0.0235288	7.19741	0.131212	0.898	0.915	-7.79216	0.270817	6.98619	1.06482	0.317	0.372	-7.17337	0	1	0	0	1	0	0	1	0
40968	9670	IPO13	NM_014652	1	0	44185229	44206010	44185859	44205940	0.151158	8.1157	2.20126	0.0458	0.135	-5.2838	-0.390261	8.77307	-1.34687	0.245	0.541388	-5.75438	2333599	0.576826	8.30886	4.05419	0.00412	0.00819	-2.80259	0.361239	8.70077	3.36228	0.00814	0.0136	-3.72758	0.271691	8.57561	3.489	0.00761	0.0131	-3.56894	1	0	0	1	0	0	1	0	0
1060	1802	DPH2	NM_001039589	1	0	44208239	44211629	44208434	44210797	1.42463	8.83901	12.7165	7.55e-09	3.46e-07	10.7263	-0.752864	9.67846	-2.40083	0.0702	0.33097	-4.47373	2333635	1.77876	9.43189	13.9461	1.15e-06	1.71e-05	6.13358	1.27475	9.17893	12.8142	3.68e-07	3.62e-06	6.99634	1.76943	8.93287	16.1062	1.31e-07	3.23e-06	8.25917	1	0	0	1	0	0	1	0	0
1060	1802	DPH2	NM_001384	1	0	44208239	44211629	44208434	44210797	1.42463	8.83901	12.7165	7.55e-09	3.46e-07	10.7263	-0.752864	9.67846	-2.40083	0.0702	0.33097	-4.47373	2333635	1.77876	9.43189	13.9461	1.15e-06	1.71e-05	6.13358	1.27475	9.17893	12.8142	3.68e-07	3.62e-06	6.99634	1.76943	8.93287	16.1062	1.31e-07	3.23e-06	8.25917	1	0	0	1	0	0	1	0	0
2986	533	ATP6V0B	NM_004047	1	0	44213188	44216557	44213299	44216265	0.555649	10.5904	5.20207	0.000156	0.00107	0.409197	0.307479	11.1815	1.04583	0.351	0.624955	-6.07945	2333658	0.630433	10.65	5.58695	0.000631	0.00163	-0.763993	-0.119538	11.1034	-0.847188	0.418	0.469	-7.41914	-0.177968	11.1816	-2.4529	0.0384	0.0562	-5.23442	0	1	0	0	1	0	1	0	0
2986	533	ATP6V0B	NM_001039457	1	0	44213188	44216557	44214373	44216265	0.555649	10.5904	5.20207	0.000156	0.00107	0.409197	0.307479	11.1815	1.04583	0.351	0.624955	-6.07945	2333658	0.630433	10.65	5.58695	0.000631	0.00163	-0.763993	-0.119538	11.1034	-0.847188	0.418	0.469	-7.41914	-0.177968	11.1816	-2.4529	0.0384	0.0562	-5.23442	0	1	0	0	1	0	1	0	0
2804	8704	B4GALT2	NM_003780	1	0	44217452	44229425	44219419	44228706	1.1701	8.37367	9.5188	2.52e-07	5.07e-06	7.09437	-0.713294	9.83545	-2.41085	0.0694	0.32998	-4.46156	2333678	2.49955	8.58414	16.477	3.37e-07	8.65e-06	7.43794	2.89227	8.70697	17.41	2.46e-08	6.91e-07	9.86666	2.51683	8.66	14.0123	4.05e-07	6.37e-06	7.05597	1	0	0	1	0	0	1	0	0
2804	8704	B4GALT2	NM_001005417	1	0	44218769	44229425	44219419	44228706	1.1701	8.37367	9.5188	2.52e-07	5.07e-06	7.09437	-0.713294	9.83545	-2.41085	0.0694	0.32998	-4.46156	2333678	2.49955	8.58414	16.477	3.37e-07	8.65e-06	7.43794	2.89227	8.70697	17.41	2.46e-08	6.91e-07	9.86666	2.51683	8.66	14.0123	4.05e-07	6.37e-06	7.05597	1	0	0	1	0	0	1	0	0
51863	149473	CCDC24	NM_152499	1	0	44229866	44234782	44230137	44234418	-0.35215	7.39209	-3.27555	0.00583	0.0241	-3.28219	-0.821735	9.76245	-3.36083	0.0256	0.229295	-3.3686	2333707	-1.28841	6.1629	-4.94519	-1000	-1000	-1000	-1.20156	7.697	-7.5853	3.05e-05	0.000101	2.23556	-0.918076	6.99258	-6.06757	0.000246	0.000653	0.108712	0	0	1	0	0	1	0	1	0
5050	6536	SLC6A9	NM_006934	1	1	44234742	44255583	44235803	44255391	-0.026355	5.89874	-0.265024	0.795	0.898	-7.46048	-0.708266	4.17531	-2.2257	0.0857	0.355016	-4.68792	2409507	1.04823	6.55139	4.38484	0.00267	0.00561	-2.33462	1.31082	6.46349	4.96421	0.000734	0.00156	-1.18912	2.43194	4.83437	2.63237	-1000	-1000	-1000	1	0	0	0	1	0	1	0	0
5050	6536	SLC6A9	NM_201649	1	1	44234742	44255583	44235803	44255391	-0.026355	5.89874	-0.265024	0.795	0.898	-7.46048	-0.708266	4.17531	-2.2257	0.0857	0.355016	-4.68792	2409507	1.04823	6.55139	4.38484	0.00267	0.00561	-2.33462	1.31082	6.46349	4.96421	0.000734	0.00156	-1.18912	2.43194	4.83437	2.63237	-1000	-1000	-1000	1	0	0	0	1	0	1	0	0
5050	6536	SLC6A9	NM_001024845	1	1	44234742	44269720	44235803	44262535	-0.026355	5.89874	-0.265024	0.795	0.898	-7.46048	-0.708266	4.17531	-2.2257	0.0857	0.355016	-4.68792	2409507	1.04823	6.55139	4.38484	0.00267	0.00561	-2.33462	1.31082	6.46349	4.96421	0.000734	0.00156	-1.18912	2.43194	4.83437	2.63237	-1000	-1000	-1000	1	0	0	0	1	0	1	0	0
12621	128209	KLF17	NM_173484	1	0	44357108	44373393	44357166	44369014	0.0997714	5.82369	1.46429	0.166	0.357	-6.43279	-0.412981	3.43075	-1.48971	0.206	0.50262	-5.5884	2333777	0.000452333	4.91022	0.0010627	-1000	-1000	-1000	0.0559938	3.37035	0.209596	-1000	-1000	-1000	1.41358	3.1833	2.34631	-1000	-1000	-1000	0	1	0	0	1	0	0	1	0
41311	55929	DMAP1	NM_001034023	1	0	44451711	44458937	44452012	44458876	-0.109085	7.40965	-0.994445	0.338	0.565	-6.9869	-0.454688	10.222	-1.99399	0.112	0.39175	-4.97389	2333794	-0.041377	8.54891	-0.271609	0.793	0.825	-7.68774	-0.41669	8.96275	-3.75281	0.00439	0.00774	-3.08308	-0.810325	9.64474	-6.87968	0.000101	0.000309	1.08137	0	0	1	0	0	1	0	1	0
41311	55929	DMAP1	NM_001034024	1	0	44451711	44458937	44452012	44458876	-0.109085	7.40965	-0.994445	0.338	0.565	-6.9869	-0.454688	10.222	-1.99399	0.112	0.39175	-4.97389	2333794	-0.041377	8.54891	-0.271609	0.793	0.825	-7.68774	-0.41669	8.96275	-3.75281	0.00439	0.00774	-3.08308	-0.810325	9.64474	-6.87968	0.000101	0.000309	1.08137	0	0	1	0	0	1	0	1	0
41311	55929	DMAP1	NM_019100	1	0	44451711	44458937	44452012	44458876	-0.109085	7.40965	-0.994445	0.338	0.565	-6.9869	-0.454688	10.222	-1.99399	0.112	0.39175	-4.97389	2333794	-0.041377	8.54891	-0.271609	0.793	0.825	-7.68774	-0.41669	8.96275	-3.75281	0.00439	0.00774	-3.08308	-0.810325	9.64474	-6.87968	0.000101	0.000309	1.08137	0	0	1	0	0	1	0	1	0
15403	79033	PRNPIP	NM_024066	1	1	44459329	44593525	44459816	44593284	1.1332	8.25981	13.0376	5.54e-09	2.76e-07	11.045	-0.174823	8.36395	-0.689558	0.526	0.758506	-6.39615	2409613	1.55891	9.09941	8.50337	3.93e-05	0.000175	2.28638	1.24919	8.38138	8.36283	1.38e-05	5.26e-05	3.0912	1.2273	10.3675	12.2068	1.23e-06	1.26e-05	5.86475	1	0	0	1	0	0	1	0	0
10036	55182	C1orf164	NM_018150	1	0	44643546	44889982	44650356	44889033	0.18039	9.13855	2.14427	0.0509	0.147	-5.38176	-0.530887	10.0454	-2.22706	0.0856	0.354924	-4.68625	2333907	0.17146	10.8401	1.51878	0.169	0.215	-6.59195	0.441613	11.315	4.40652	0.00163	0.00318	-2.03797	-0.0022335	10.7958	-0.0385644	0.97	0.975	-7.76651	1	0	0	0	1	0	0	1	0
41573	79639	TMEM53	NM_024587	1	1	44892088	44912685	44892817	44912649	0.104929	6.59934	1.05979	0.308	0.535	-6.92026	-0.263554	8.38142	-1.029	0.358	0.631463	-6.09632	2409770	0.172698	7.99488	1.3359	0.22	0.271	-6.82407	-0.131919	8.68598	-1.10408	0.298	0.347	-7.16813	-0.105881	8.39111	-1.11637	0.295	0.35	-7.11837	0	1	0	0	1	0	0	1	0
-1	339541	MGC33556	NM_001004307	1	0	44912980	44963847	44927956	44962654	-1000	-1000	-1000	-1000	-1000	-1000	-0.230089	4.40378	-0.83047	0.45	0.703168	-6.28191	-1000	-1000	-1000	-1000	-1000	-1000	-1000	-1000	-1000	-1000	-1000	-1000	-1000	-1000	-1000	-1000	-1000	-1000	-1000	0	1	0	0	1	0	0	1	0
21355	11004	KIF2C	NM_006845	1	0	44978137	45005992	44978191	45005437	0.751871	9.50193	6.36641	2.17e-05	0.000197	2.45355	-0.579477	11.5962	-2.17043	0.0914	0.362921	-4.75596	2334098	1.07302	9.97203	6.01931	0.000394	0.0011	-0.24826	1.12663	9.482	12.8608	3.57e-07	3.53e-06	7.0302	1.16301	9.70581	18.4382	4.31e-08	1.82e-06	9.42101	1	0	0	1	0	0	1	0	0
100607	6202	RPS8	NM_001012	1	0	45013832	45016997	45013855	45016943	0.137879	5.52055	1.11513	0.284	0.509	-6.86103	-0.0738347	17.5772	-0.329564	0.757	0.894696	-6.60458	2334163	0.222101	13.8168	1.93379	0.0913	0.125	-6.01309	0.89674	12.7513	7.24648	4.39e-05	0.000136	1.84189	-0.662047	6.71207	-4.51323	0.00174	0.00353	-2.00068	1	0	0	0	0	1	0	1	0
50713	266675	BEST4	NM_153274	1	1	45021845	45025963	45022468	45025963	-0.0466031	4.23923	-0.630737	0.539	0.737	-7.28798	-0.294128	10.6928	-1.05237	0.348	0.622797	-6.07285	2409820	0.104182	6.41223	0.448749	-1000	-1000	-1000	-0.232839	6.90551	-2.36481	0.0418	0.0601	-5.38566	-0.12898	6.71473	-0.646582	-1000	-1000	-1000	0	1	0	0	1	0	0	1	0
20865	1263	PLK3	NM_004073	1	0	45038622	45044252	45038722	45043936	-0.275446	7.77297	-2.1736	0.0483	0.141	-5.33149	1.89685	9.86958	2.75647	0.0474	0.286186	-4.04865	2334191	-0.66132	8.48762	-6.35191	0.000279	0.000827	0.131848	-0.79822	9.45697	-8.91956	8.12e-06	3.42e-05	3.66611	-0.73625	8.62208	-9.78552	7.05e-06	4.06e-05	3.97446	0	0	1	0	0	1	0	0	1
18398	343521	LOC343521	NM_001013632	1	1	45044176	45045543	45044261	45044926	-1000	-1000	-1000	-1000	-1000	-1000	-1000	-1000	-1000	-1000	-1000	-1000	-1000	-1000	-1000	-1000	-1000	-1000	-1000	-1000	-1000	-1000	-1000	-1000	-1000	-1000	-1000	-1000	-1000	-1000	-1000	0	1	0	0	1	0	0	1	0
37842	8643	PTCH2	NM_003738	1	1	45060674	45081202	45060674	45081190	0.110258	7.37018	1.56152	0.142	0.319	-6.29829	0.179336	6.23109	0.546162	0.612	0.813526	-6.4947	2409847	-0.247368	7.11093	-0.772805	0.463	0.517	-7.40445	0.007652	7.65865	0.0425217	0.967	0.973	-7.80068	0.706126	6.3813	2.08102	-1000	-1000	-1000	0	1	0	0	1	0	0	1	0
7005	8891	EIF2B3	NM_020365	1	1	45089036	45224868	45089209	45219426	1.41444	8.9173	16.5248	2.77e-10	3.46e-08	14.0916	-0.279763	8.25275	-1.04915	0.35	0.623735	-6.0761	2409904	2.06354	9.90736	13.3215	1.6e-06	2.08e-05	5.77404	1.4231	9.71021	8.0176	1.95e-05	6.9e-05	2.71921	1.4217	9.79843	11.1459	2.54e-06	2.02e-05	5.0833	1	0	0	1	0	0	1	0	0
18426	79654	HECTD3	NM_024602	1	1	45240800	45249386	45241750	45247848	-0.544495	8.45054	-8.12271	1.57e-06	2.22e-05	5.19125	0.199717	5.68022	0.857204	0.437	0.692659	-6.25849	2409970	-0.623793	8.85998	-5.13111	0.00107	0.00255	-1.33541	-1.03241	10.1166	-9.70583	4.01e-06	1.99e-05	4.42963	-0.677568	8.60118	-9.83506	6.78e-06	3.94e-05	4.01719	0	0	1	0	0	1	0	0	1
320	7389	UROD	NM_000374	1	0	45250416	45253927	45250524	45253756	0.386004	8.99324	3.04388	0.00915	0.0354	-3.73014	-1.07752	11.8657	-4.63733	0.00832	0.163561	-2.13272	2334279	0.737127	7.94157	4.93769	0.00134	0.00311	-1.58672	0.400552	8.94922	2.29128	0.0472	0.067	-5.50465	-0.0126465	10.2741	-0.126876	0.902	0.919	-7.75836	0	1	0	0	1	0	1	0	0
13109	84842	GLOXD1	NM_032756	1	0	45565131	45566930	45565407	45566522	3.1605	8.08143	21.5834	8.81e-12	4.34e-09	17.5012	-1.24013	7.35899	-2.33474	0.0757	0.339257	-4.55427	2334314	4.92953	7.62539	19.3068	1.04e-07	5.06e-06	8.66303	4.82819	7.48911	23.6153	1.59e-09	1.82e-07	12.6827	5.00088	8.34946	20.3543	1.91e-08	1.21e-06	10.2625	1	0	0	1	0	0	1	0	0
-1	-1	MUTYH	NM_001048174	1	1	45567500	45578215	45567564	45572763	-1000	-1000	-1000	-1000	-1000	-1000	-0.492832	10.3013	-2.10248	0.0989	0.374095	-4.8398	2410111	0.255699	7.78744	1.86526	0.101	0.137	-6.11258	-0.130321	9.67687	-1.28314	0.231	0.277	-6.96348	-0.189026	8.867	-2.14106	0.063	0.088	-5.72495	0	1	0	0	1	0	0	1	0
-1	-1	MUTYH	NM_001048172	1	1	45567500	45578373	45567564	45572763	-1000	-1000	-1000	-1000	-1000	-1000	-0.492832	10.3013	-2.10248	0.0989	0.374095	-4.8398	2410111	0.255699	7.78744	1.86526	0.101	0.137	-6.11258	-0.130321	9.67687	-1.28314	0.231	0.277	-6.96348	-0.189026	8.867	-2.14106	0.063	0.088	-5.72495	0	1	0	0	1	0	0	1	0
-1	-1	MUTYH	NM_001048173	1	1	45567500	45578373	45567564	45572763	-1000	-1000	-1000	-1000	-1000	-1000	-0.492832	10.3013	-2.10248	0.0989	0.374095	-4.8398	2410111	0.255699	7.78744	1.86526	0.101	0.137	-6.11258	-0.130321	9.67687	-1.28314	0.231	0.277	-6.96348	-0.189026	8.867	-2.14106	0.063	0.088	-5.72495	0	1	0	0	1	0	0	1	0
8156	4595	MUTYH	NM_001048171	1	1	45567500	45578728	45567564	45578512	-0.234023	7.96728	-3.12443	0.00782	0.0309	-3.57493	-0.492832	10.3013	-2.10248	0.0989	0.374095	-4.8398	2410111	0.255699	7.78744	1.86526	0.101	0.137	-6.11258	-0.130321	9.67687	-1.28314	0.231	0.277	-6.96348	-0.189026	8.867	-2.14106	0.063	0.088	-5.72495	0	1	0	0	1	0	0	1	0
-1	-1	MUTYH	NM_012222	1	1	45567500	45578728	45567564	45578512	-1000	-1000	-1000	-1000	-1000	-1000	-0.296845	5.67731	-0.942446	0.396	0.661444	-6.18042	2410111	0.255699	7.78744	1.86526	0.101	0.137	-6.11258	-0.130321	9.67687	-1.28314	0.231	0.277	-6.96348	-0.189026	8.867	-2.14106	0.063	0.088	-5.72495	0	1	0	0	1	0	0	1	0
11823	114034	TOE1	NM_025077	1	0	45577928	45581959	45578511	45581959	0.629491	8.59421	6.84773	1.01e-05	0.000104	3.24477	-1.2614	8.46246	-5.09199	0.00587	0.15151	-1.75474	2334319	1.57278	8.70514	10.5589	8.56e-06	6e-05	3.95446	0.40109	9.31013	4.16519	0.00233	0.00438	-2.41798	0.851483	8.72837	7.51855	5.25e-05	0.000181	1.79062	1	0	0	1	0	0	1	0	0
5188	10420	TESK2	NM_007170	1	1	45582141	45729426	45583098	45696043	-0.699525	7.8763	-6.27215	2.53e-05	0.000224	2.29488	0.954834	6.97217	2.62039	0.055	0.303803	-4.20945	2410158	-1.37042	7.88698	-9.04588	2.55e-05	0.000127	2.75855	-1.21595	7.03532	-10.7858	1.63e-06	1.01e-05	5.39609	-0.900463	7.36162	-8.83965	1.55e-05	7.12e-05	3.12037	0	0	1	0	0	1	0	0	1
12082	25974	MMACHC	NM_015506	1	0	45738577	45749312	45738591	45747473	0.730571	7.38612	6.91412	9.16e-06	9.53e-05	3.35142	-0.203782	5.29897	-0.775249	0.479	0.725966	-6.32858	2334350	2.10747	8.71395	12.946	1.97e-06	2.3e-05	5.54963	1.9499	8.46607	8.27002	1.51e-05	5.65e-05	2.9924	1.56272	8.46822	9.84472	6.73e-06	3.91e-05	4.02551	1	0	0	1	0	0	1	0	0
99789	5052	PRDX1	NM_002574	1	1	45749294	45760195	45749587	45757301	1.2345	12.1496	10.6214	6.84e-08	1.8e-06	8.45007	-0.212748	14.8673	-0.932844	0.401	0.665188	-6.18946	2410241	1.32117	12.6286	10.7253	7.66e-06	5.57e-05	4.07628	1.71629	11.6902	9.68525	4.08e-06	2.02e-05	4.41033	0.441937	12.9402	5.23329	0.000674	0.00155	-0.981394	1	0	0	1	0	0	1	0	0
99789	5052	PRDX1	NM_181696	1	1	45749294	45760195	45749587	45757301	1.2345	12.1496	10.6214	6.84e-08	1.8e-06	8.45007	-0.212748	14.8673	-0.932844	0.401	0.665188	-6.18946	2410241	1.32117	12.6286	10.7253	7.66e-06	5.57e-05	4.07628	1.71629	11.6902	9.68525	4.08e-06	2.02e-05	4.41033	0.441937	12.9402	5.23329	0.000674	0.00155	-0.981394	1	0	0	1	0	0	1	0	0
99789	5052	PRDX1	NM_181697	1	1	45749294	45760195	45749587	45757301	1.2345	12.1496	10.6214	6.84e-08	1.8e-06	8.45007	-0.212748	14.8673	-0.932844	0.401	0.665188	-6.18946	2410241	1.32117	12.6286	10.7253	7.66e-06	5.57e-05	4.07628	1.71629	11.6902	9.68525	4.08e-06	2.02e-05	4.41033	0.441937	12.9402	5.23329	0.000674	0.00155	-0.981394	1	0	0	1	0	0	1	0	0
74565	10327	AKR1A1	NM_006066	1	0	45789084	45808306	45800053	45808214	0.0462268	7.3701	0.564528	0.582	0.768	-7.32927	-0.687614	11.4615	-2.71678	0.0495	0.291145	-4.09529	2334374	0.980625	8.15775	8.06308	5.66e-05	0.000233	1.88402	-0.108988	8.09326	-0.552679	0.594	0.638	-7.63533	0.548305	8.50224	4.45767	0.00188	0.00378	-2.08235	0	1	0	1	0	0	1	0	0
74565	10327	AKR1A1	NM_153326	1	0	45789084	45808306	45800053	45808214	0.0462268	7.3701	0.564528	0.582	0.768	-7.32927	-0.687614	11.4615	-2.71678	0.0495	0.291145	-4.09529	2334374	0.980625	8.15775	8.06308	5.66e-05	0.000233	1.88402	-0.108988	8.09326	-0.552679	0.594	0.638	-7.63533	0.548305	8.50224	4.45767	0.00188	0.00378	-2.08235	0	1	0	1	0	0	1	0	0
1856	4678	NASP	NM_002482	1	0	45822303	45857153	45822405	45856399	1.05105	8.18923	8.82631	6.08e-07	1.02e-05	6.17826	-1.3142	12.0371	-4.93332	0.00661	0.155141	-1.88323	2334404	1.09445	10.9494	9.91085	1.34e-05	8.14e-05	3.46247	0.933863	9.70046	10.619	1.87e-06	1.12e-05	5.25252	0.598618	11.0531	8.00222	3.29e-05	0.000126	2.29767	1	0	0	1	0	0	1	0	0
1856	4678	NASP	NM_152298	1	0	45822303	45857153	45822405	45856399	1.05105	8.18923	8.82631	6.08e-07	1.02e-05	6.17826	-1.3142	12.0371	-4.93332	0.00661	0.155141	-1.88323	2334404	1.09445	10.9494	9.91085	1.34e-05	8.14e-05	3.46247	0.933863	9.70046	10.619	1.87e-06	1.12e-05	5.25252	0.598618	11.0531	8.00222	3.29e-05	0.000126	2.29767	1	0	0	1	0	0	1	0	0
1856	4678	NASP	NM_172164	1	0	45822303	45857153	45829489	45856399	1.05105	8.18923	8.82631	6.08e-07	1.02e-05	6.17826	-1.3142	12.0371	-4.93332	0.00661	0.155141	-1.88323	2334404	1.09445	10.9494	9.91085	1.34e-05	8.14e-05	3.46247	0.933863	9.70046	10.619	1.87e-06	1.12e-05	5.25252	0.598618	11.0531	8.00222	3.29e-05	0.000126	2.29767	1	0	0	1	0	0	1	0	0
77410	149483	CCDC17	NM_152500	1	1	45858303	45862259	45858533	45861331	-0.0183135	6.56882	-0.233258	0.819	0.911	-7.46892	0.150022	4.60806	0.452195	0.673	0.848968	-6.54845	-1000	-1000	-1000	-1000	-1000	-1000	-1000	-1000	-1000	-1000	-1000	-1000	-1000	-1000	-1000	-1000	-1000	-1000	-1000	0	1	0	0	1	0	0	1	0
84840	60313	GPBP1L1	NM_021639	1	1	45865567	45899397	45866514	45897345	-0.851101	7.09997	-2.75739	0.016	0.0567	-4.27538	0.142238	9.88295	0.633167	0.559	0.779382	-6.43717	2410330	-0.188706	9.7245	-1.46643	0.183	0.23	-6.66011	-0.511884	9.30799	-2.97359	0.0153	0.0241	-4.37691	-0.642079	10.1897	-2.88135	0.0195	0.0303	-4.54498	0	0	1	0	0	1	0	1	0
9531	51249	TMEM69	NM_016486	1	0	45926454	45932692	45931551	45932163	1.11531	9.73574	7.30857	5.04e-06	5.79e-05	3.97286	0.392661	7.7884	1.47595	0.21	0.506734	-5.60462	2334459	0.952866	11.7089	6.21504	0.000321	0.000931	-0.0228655	0.587175	10.8526	3.68429	0.00489	0.00853	-3.19527	0.353044	11.3871	4.11795	0.00302	0.00572	-2.59074	1	0	0	1	0	0	1	0	0
4309	3652	IPP	NM_005897	1	1	45936995	45984719	45938224	45984669	-0.636941	6.11371	-4.31156	0.000794	0.00432	-1.26662	0.633511	5.38541	1.88296	0.128	0.413897	-5.11106	-1000	-1000	-1000	-1000	-1000	-1000	-1000	-1000	-1000	-1000	-1000	-1000	-1000	-1000	-1000	-1000	-1000	-1000	-1000	0	1	0	0	1	0	0	1	0
7428	23139	MAST2	NM_015112	1	0	46041871	46274382	46042154	46274324	0.470033	7.41964	4.83556	0.000301	0.00188	-0.270314	0.276032	8.41625	0.78507	0.474	0.721759	-6.32046	2334476	0.612201	8.49751	4.93544	0.00134	0.00311	-1.58967	0.390209	8.53446	5.0672	0.000637	0.00137	-1.03704	0.458607	7.88867	6.9141	9.71e-05	0.0003	1.12079	1	0	0	1	0	0	1	0	0
2690	8503	PIK3R3	NM_003629	1	1	46278400	46370900	46281931	46370210	0.120771	6.32231	1.57015	0.14	0.316	-6.28605	-1.38176	5.17721	-4.35277	0.0105	0.173236	-2.38511	2410470	0.370874	10.4861	2.53032	0.0368	0.0561	-5.1101	0.0007595	9.86942	0.00887763	0.993	0.994	-7.80164	0.05185	9.94779	0.382025	0.712	0.754	-7.68653	0	1	0	0	1	0	0	1	0
21170	10103	TSPAN1	NM_005727	1	0	46418798	46424216	46419366	46423791	-0.20484	7.09588	-2.00553	0.0656	0.179	-5.61482	0.196199	6.57892	0.652421	0.548	0.772508	-6.42348	2334602	-0.0585683	5.22892	-0.228017	-1000	-1000	-1000	0.218483	5.53107	1.37017	-1000	-1000	-1000	-0.524653	5.34234	-1.46372	-1000	-1000	-1000	0	1	0	0	1	0	0	1	0
9806	55624	POMGNT1	NM_017739	1	1	46426940	46436707	46427528	46436079	0.798288	6.72945	4.15777	0.00106	0.00557	-1.56348	0.839822	8.85802	2.33972	0.0752	0.338613	-4.54819	2410522	0.736498	8.87968	7.65057	8.1e-05	0.000311	1.49029	-0.104047	9.40312	-0.835941	0.424	0.475	-7.42886	0.326014	8.70079	3.04228	0.0151	0.0242	-4.285	0	1	0	1	0	0	1	0	0
66379	541468	C1orf190	NM_001013615	1	0	46441592	46509911	46441685	46458478	-0.0614734	7.11957	-0.715413	0.487	0.697	-7.22892	0.262793	7.17008	0.990361	0.375	0.644855	-6.13443	2334629	0.0213213	7.8962	0.147628	0.886	0.906	-7.71692	-0.679326	8.10617	-4.17296	0.00231	0.00433	-2.40564	-0.541235	7.94125	-1.79317	0.109	0.144	-6.24718	0	0	1	0	1	0	0	1	0
48227	8438	RAD54L	NM_003579	1	0	46486003	46516731	46486664	46516540	1.07427	8.47279	13.5133	3.54e-09	2.01e-07	11.504	-0.618704	10.2669	-2.3981	0.0704	0.33134	-4.47705	2334646	1.12123	9.17935	9.59624	1.69e-05	9.54e-05	3.213	1.04832	9.55946	14.2025	1.5e-07	2e-06	7.95894	1.20841	8.87853	13.6104	5.13e-07	7.26e-06	6.80438	1	0	0	1	0	0	1	0	0
4645	10489	LRRC41	NM_006369	1	1	46516659	46541624	46517123	46541580	0.679653	5.92629	8.44922	1e-06	1.53e-05	5.6566	0.794576	6.40088	2.04245	0.106	0.383784	-4.91398	2410574	0.265191	10.0463	2.1091	0.07	0.0988	-5.75344	-0.171544	10.2229	-2.02601	0.0728	0.0994	-5.92438	-0.104851	9.95996	-1.4609	0.18	0.226	-6.70537	0	1	0	0	1	0	0	1	0
104063	7388	UQCRH	NM_006004	1	0	46541966	46555031	46542025	46554842	0.591622	12.2687	7.76526	2.59e-06	3.34e-05	4.66674	-0.233121	14.7981	-1.01838	0.363	0.634949	-6.10689	2334689	1.20439	10.6676	10.9327	6.68e-06	5.12e-05	4.22564	1.44853	9.37902	10.2348	2.56e-06	1.41e-05	4.91416	0.240058	12.8157	3.74364	0.0052	0.0093	-3.1677	1	0	0	1	0	0	1	0	0
12455	387338	NSUN4	NM_199044	1	0	46578976	46603276	46579085	46600104	0.380232	8.32962	5.68212	6.75e-05	0.000522	1.27404	-0.16798	7.20013	-0.504296	0.639	0.828729	-6.51975	2334706	0.616876	10.2239	5.34841	0.000827	0.00206	-1.05938	0.399492	9.59522	3.03281	0.0139	0.0221	-4.27781	0.453026	9.76783	5.02269	0.000882	0.00196	-1.27193	1	0	0	1	0	0	1	0	0
68184	2166	FAAH	NM_001441	1	0	46632578	46652098	46632607	46651833	-0.0454403	6.38933	-0.512003	0.617	0.791	-7.35892	-1.09891	5.06773	-2.93662	0.0392	0.266448	-3.83986	2334740	0.364258	5.98229	1.62865	-1000	-1000	-1000	-0.132443	7.0405	-1.13883	0.284	0.333	-7.13019	-0.0264967	6.45212	-0.148188	-1000	-1000	-1000	0	1	0	0	1	0	0	1	0
15639	127343	DMBX1	NM_147192	1	0	46745254	46752470	46745269	46750752	-0.00672863	4.30078	-0.0944646	0.926	0.966	-7.49323	-0.127227	2.81025	-0.470177	0.661	0.841874	-6.53886	2334847	-0.16441	7.91651	-0.880282	0.406	0.464	-7.31242	-0.0403932	7.8968	-0.187219	0.856	0.877	-7.78231	-0.142457	8.04662	-0.493495	0.634	0.682	-7.63326	0	1	0	0	1	0	0	1	0
15639	127343	DMBX1	NM_172225	1	0	46745254	46752470	46745269	46750752	-0.00672863	4.30078	-0.0944646	0.926	0.966	-7.49323	-0.127227	2.81025	-0.470177	0.661	0.841874	-6.53886	2334847	-0.16441	7.91651	-0.880282	0.406	0.464	-7.31242	-0.0403932	7.8968	-0.187219	0.856	0.877	-7.78231	-0.142457	8.04662	-0.493495	0.634	0.682	-7.63326	0	1	0	0	1	0	0	1	0
88613	148930	FLJ32011	NM_182516	1	1	46783902	46788270	46785584	46785994	-1000	-1000	-1000	-1000	-1000	-1000	0.058417	2.67653	0.0855693	0.936	0.976971	-6.66526	-1000	-1000	-1000	-1000	-1000	-1000	-1000	-1000	-1000	-1000	-1000	-1000	-1000	-1000	-1000	-1000	-1000	-1000	-1000	0	1	0	0	1	0	0	1	0
37838	8569	MKNK1	NM_003684	1	1	46795677	46842472	46796833	46832404	-0.707408	5.20247	-7.31725	4.98e-06	5.73e-05	3.98631	1.02172	7.66035	3.00413	0.0366	0.260087	-3.7629	-1000	-1000	-1000	-1000	-1000	-1000	-1000	-1000	-1000	-1000	-1000	-1000	-1000	-1000	-1000	-1000	-1000	-1000	-1000	0	1	0	0	1	0	0	1	0
37838	8569	MKNK1	NM_198973	1	1	46796839	46832404	46797020	46832404	-0.707408	5.20247	-7.31725	4.98e-06	5.73e-05	3.98631	-1000	-1000	-1000	-1000	-1000	-1000	-1000	-1000	-1000	-1000	-1000	-1000	-1000	-1000	-1000	-1000	-1000	-1000	-1000	-1000	-1000	-1000	-1000	-1000	-1000	0	1	0	0	1	0	0	1	0
64826	148932	MOBKL2C	NM_145279	1	1	46845978	46853391	46847913	46853334	-0.8698	7.05954	-7.56993	3.43e-06	4.2e-05	4.37328	-0.295762	5.87415	-1.2205	0.285	0.574128	-5.89565	-1000	-1000	-1000	-1000	-1000	-1000	-1000	-1000	-1000	-1000	-1000	-1000	-1000	-1000	-1000	-1000	-1000	-1000	-1000	0	1	0	0	1	0	0	1	0
64826	148932	MOBKL2C	NM_201403	1	1	46845978	46855092	46847913	46851579	-0.8698	7.05954	-7.56993	3.43e-06	4.2e-05	4.37328	-0.295762	5.87415	-1.2205	0.285	0.574128	-5.89565	-1000	-1000	-1000	-1000	-1000	-1000	-1000	-1000	-1000	-1000	-1000	-1000	-1000	-1000	-1000	-1000	-1000	-1000	-1000	0	1	0	0	1	0	0	1	0
41492	64756	ATPAF1	NM_001042546	1	1	46870999	46906685	46874034	46906580	1.13503	7.77252	10.5823	7.15e-08	1.86e-06	8.40401	-0.890432	10.7977	-3.37795	0.0251	0.227785	-3.35021	-1000	-1000	-1000	-1000	-1000	-1000	-1000	-1000	-1000	-1000	-1000	-1000	-1000	-1000	-1000	-1000	-1000	-1000	-1000	0	1	0	0	1	0	0	1	0
-1	-1	ATPAF1	NM_022745	1	1	46870999	46906685	46874034	46906580	-1000	-1000	-1000	-1000	-1000	-1000	-0.890432	10.7977	-3.37795	0.0251	0.227785	-3.35021	-1000	-1000	-1000	-1000	-1000	-1000	-1000	-1000	-1000	-1000	-1000	-1000	-1000	-1000	-1000	-1000	-1000	-1000	-1000	0	1	0	0	1	0	0	1	0
8858	9813	KIAA0494	NM_014774	1	1	46913419	46957322	46916719	46956345	-0.578773	10.1905	-8.88706	5.61e-07	9.58e-06	6.26077	0.224843	9.55105	0.926529	0.403	0.667561	-6.19538	-1000	-1000	-1000	-1000	-1000	-1000	-1000	-1000	-1000	-1000	-1000	-1000	-1000	-1000	-1000	-1000	-1000	-1000	-1000	0	1	0	0	1	0	0	1	0
73900	1580	CYP4B1	NM_000779	1	0	47037328	47057671	47037340	47057072	-0.0286094	4.28372	-0.345138	0.735	0.866	-7.43447	-0.479806	3.59274	-1.185	0.298	0.583119	-5.93419	2334932	-0.319402	6.03765	-1.33546	-1000	-1000	-1000	-0.307598	5.56583	-1.39346	-1000	-1000	-1000	-0.402627	6.03972	-1.61777	-1000	-1000	-1000	0	1	0	0	1	0	0	1	0
110448	1579	CYP4A11	NM_000778	1	1	47167434	47180003	47168373	47179691	-0.122436	5.08066	-1.54071	0.147	0.327	-6.32758	-0.453926	5.30215	-1.5704	0.187	0.482074	-5.49236	2335048	-0.260154	6.73854	-0.836128	-1000	-1000	-1000	-0.035895	6.13188	-0.148246	-1000	-1000	-1000	0.103618	6.03976	0.359164	-1000	-1000	-1000	0	1	0	0	1	0	0	1	0
75853	260293	CYP4X1	NM_178033	1	0	47261826	47289008	47262076	47288432	-0.0351617	3.62174	-0.526576	0.607	0.785	-7.35097	-1.49314	5.99145	-5.73802	0.00373	0.137531	-1.2668	2334986	-0.055577	5.27874	-0.191395	-1000	-1000	-1000	0.110479	5.43062	0.605456	-1000	-1000	-1000	-0.028177	5.02729	-0.124401	-1000	-1000	-1000	0	1	0	0	1	0	0	1	0
79596	199974	CYP4Z1	NM_178134	1	0	47305746	47356578	47305749	47356192	-0.00931765	3.97987	-0.138991	0.892	0.949	-7.48767	0.689022	1.89565	1.05264	0.348	0.622797	-6.07258	2335014	-0.289149	6.01543	-0.885342	-1000	-1000	-1000	0.338894	5.28295	1.57367	-1000	-1000	-1000	0.226357	5.29586	0.652705	-1000	-1000	-1000	0	1	0	0	1	0	0	1	0
107112	284541	CYP4A22	NM_001010969	1	0	47375693	47387112	47375744	47387055	-0.134451	4.07349	-1.86342	0.0845	0.218	-5.84474	-0.453926	5.30215	-1.5704	0.187	0.482074	-5.49236	2335048	-0.260154	6.73854	-0.836128	-1000	-1000	-1000	-0.035895	6.13188	-0.148246	-1000	-1000	-1000	0.103618	6.03976	0.359164	-1000	-1000	-1000	0	1	0	0	1	0	0	1	0
4213	10158	PDZK1IP1	NM_005764	1	1	47421847	47428357	47422229	47428190	-0.0812444	6.12028	-0.741458	0.471	0.685	-7.20937	-0.787234	2.7154	-1.87588	0.129	0.41571	-5.1198	2411173	0.269476	6.5215	0.968299	-1000	-1000	-1000	-0.340651	6.08735	-1.77496	-1000	-1000	-1000	-0.69898	5.94329	-2.64393	-1000	-1000	-1000	0	1	0	0	1	0	0	1	0
2400	6886	TAL1	NM_003189	1	1	47454550	47468029	47457978	47464146	-0.0602005	7.08446	-0.629821	0.539	0.738	-7.28858	-0.438594	6.64584	-1.64435	0.171	0.464697	-5.40325	2411198	-0.1037	5.14967	-0.229796	-1000	-1000	-1000	-0.519969	4.69578	-2.04171	-1000	-1000	-1000	0.695714	4.89098	1.44249	-1000	-1000	-1000	0	1	0	0	1	0	0	1	0
2283	6491	STIL	NM_001048166	1	1	47488397	47552405	47489394	47548577	0.930759	8.02273	8.56496	8.58e-07	1.35e-05	5.81848	0.421126	6.4054	0.801896	0.465	0.714818	-6.30636	2411228	0.889246	9.59706	5.75489	0.000524	0.0014	-0.560697	0.775851	8.3117	6.5237	9.97e-05	0.000271	0.956229	0.664408	8.61388	6.1182	0.000232	0.000621	0.171819	1	0	0	1	0	0	1	0	0
-1	-1	STIL	NM_003035	1	1	47488397	47552405	47489394	47548577	-1000	-1000	-1000	-1000	-1000	-1000	0.421126	6.4054	0.801896	0.465	0.714818	-6.30636	2411228	0.889246	9.59706	5.75489	0.000524	0.0014	-0.560697	0.775851	8.3117	6.5237	9.97e-05	0.000271	0.956229	0.664408	8.61388	6.1182	0.000232	0.000621	0.171819	1	0	0	1	0	0	1	0	0
32308	51727	CMPK	NM_016308	1	0	47572174	47617096	47572204	47615003	0.403652	10.1469	2.83498	0.0137	0.05	-4.12896	2.06639	8.16143	4.45559	0.00963	0.168757	-2.29245	2335132	0.720485	10.3042	6.39287	0.000268	0.000799	0.177695	0.345659	7.97243	1.75267	0.113	0.147	-6.3353	-0.113802	10.2798	-0.501992	0.629	0.677	-7.62867	0	1	0	0	1	0	1	0	0
32145	2301	FOXE3	NM_012186	1	0	47654330	47656309	47654574	47655533	-0.138709	5.93895	-1.39662	0.185	0.384	-6.52271	0.406803	7.2713	1.7178	0.156	0.448542	-5.31392	2335160	-0.48266	7.0653	-0.945504	0.374	0.432	-7.25183	-0.544082	6.63653	-1.98521	-1000	-1000	-1000	-0.76923	7.48151	-2.70764	0.0256	0.039	-4.82552	0	1	0	0	0	1	0	1	0
3292	2306	FOXD2	NM_004474	1	0	47674275	47678948	47676394	47677881	-0.0857732	5.34119	-0.919191	0.374	0.601	-7.05909	-1.13348	4.87322	-2.77491	0.0465	0.284237	-4.02706	2335172	-0.154373	6.54805	-0.438783	-1000	-1000	-1000	0.278255	6.61181	1.02536	-1000	-1000	-1000	-0.195712	6.87877	-0.677742	-1000	-1000	-1000	0	1	0	0	1	0	0	1	0
17081	200010	SLC5A9	NM_001011547	1	0	48460990	48486902	48461016	48485801	-0.193128	5.75703	-2.2209	0.0442	0.131	-5.24975	-1.45372	4.60993	-2.52134	0.0613	0.316176	-4.328	-1000	-1000	-1000	-1000	-1000	-1000	-1000	-1000	-1000	-1000	-1000	-1000	-1000	-1000	-1000	-1000	-1000	-1000	-1000	0	1	0	0	1	0	0	1	0
10410	54558	SPATA6	NM_019073	1	1	48536864	48710431	48536971	48710266	-0.114834	4.0632	-1.55925	0.142	0.32	-6.3015	-0.901583	7.25395	-3.79847	0.0169	0.201076	-2.91425	2411575	0.702911	5.77294	2.43305	-1000	-1000	-1000	0.323653	4.84181	2.18634	-1000	-1000	-1000	-0.0235085	5.7859	-0.104775	-1000	-1000	-1000	0	1	0	0	1	0	0	1	0
84880	84871	AGBL4	NM_032785	1	1	48822128	49283972	48825167	49283880	0.0322209	5.33981	0.425102	0.678	0.829	-7.40184	-1.22275	2.21353	-2.23943	0.0844	0.353019	-4.67105	2411642	-0.497845	6.83894	-2.81914	0.0238	0.0383	-4.6625	0.574049	5.94717	1.70647	-1000	-1000	-1000	0.152736	6.16599	0.309886	-1000	-1000	-1000	0	1	0	0	1	0	0	0	1
41574	79656	C1orf165	NM_024603	1	1	48966128	49015089	48966144	48997395	-0.118841	5.92473	-1.57159	0.139	0.316	-6.28402	-1.08208	7.39911	-4.80664	0.00729	0.158197	-1.98842	2411799	0.117335	3.50222	0.233032	-1000	-1000	-1000	0.0299358	2.16677	0.0335308	-1000	-1000	-1000	-0.383632	3.69833	-0.34731	-1000	-1000	-1000	0	1	0	0	1	0	0	1	0
40729	1996	ELAVL4	NM_021952	1	0	50347224	50439640	50347448	50439436	-0.1485	4.5221	-1.4685	0.165	0.356	-6.42709	-1.13112	3.37344	-2.31142	0.0777	0.342046	-4.58278	2335671	-0.183431	4.83281	-0.785319	-1000	-1000	-1000	0.188847	5.13891	0.798521	-1000	-1000	-1000	-0.37835	4.75839	-0.93936	-1000	-1000	-1000	0	1	0	0	1	0	0	1	0
5120	11124	FAF1	NM_007051	1	1	50679522	51198523	50679699	51198070	0.765338	9.03942	5.91014	4.59e-05	0.000374	1.67416	-0.112957	10.479	-0.494214	0.645	0.832571	-6.52553	2412082	0.452557	8.9459	4.5537	0.00215	0.00467	-2.10154	0.17607	9.35639	1.60377	0.143	0.181	-6.54681	0.309589	9.63616	2.45484	0.0383	0.056	-5.23131	0	1	0	0	1	0	1	0	0
966	1031	CDKN2C	NM_001262	1	0	51206954	51212892	51208628	51212529	-0.452867	5.52103	-3.42296	0.00437	0.0188	-2.99527	0.121842	8.93379	0.495481	0.645	0.83201	-6.52481	2335922	-0.267977	6.57259	-1.09176	-1000	-1000	-1000	-0.002694	6.61484	-0.0169514	-1000	-1000	-1000	-0.349719	6.87699	-2.87739	0.0196	0.0305	-4.55137	0	1	0	0	0	1	0	1	0
966	1031	CDKN2C	NM_078626	1	0	51208229	51212894	51208628	51212529	-0.452867	5.52103	-3.42296	0.00437	0.0188	-2.99527	0.121842	8.93379	0.495481	0.645	0.83201	-6.52481	2335922	-0.267977	6.57259	-1.09176	-1000	-1000	-1000	-0.002694	6.61484	-0.0169514	-1000	-1000	-1000	-0.349719	6.87699	-2.87739	0.0196	0.0305	-4.55137	0	1	0	0	0	1	0	1	0
32195	26994	RNF11	NM_014372	1	0	51474558	51511796	51475016	51509581	-0.837674	8.45206	-4.13226	0.00111	0.0058	-1.61287	1.48074	10.9409	4.26847	0.0112	0.176585	-2.46234	2335986	-0.784628	9.42812	-5.99013	0.000407	0.00113	-0.282294	-1.04732	8.0843	-5.1805	0.000546	0.0012	-0.871445	-1.29288	9.5058	-6.48133	0.000155	0.000442	0.614669	0	0	1	0	0	1	0	0	1
100716	2060	EPS15	NM_001981	1	1	51592523	51757582	51594959	51757490	-1.122	9.87227	-7.55068	3.53e-06	4.3e-05	4.34409	0.93059	9.69979	3.74787	0.0177	0.204464	-2.96511	2412360	-1.02903	11.7116	-8.62163	3.57e-05	0.000163	2.39146	-1.12044	10.2843	-12.0453	6.31e-07	5.2e-06	6.41938	-0.987362	10.6534	-13.305	6.16e-07	8.11e-06	6.60822	0	0	1	0	0	1	0	0	1
69380	114883	OSBPL9	NM_024586	1	0	51855351	52026723	51855370	52026048	-0.137943	10.7805	-1.44579	0.171	0.365	-6.45768	1.43524	11.9503	6.31229	0.00257	0.125292	-0.876335	2336099	0.181139	11.3513	1.65153	0.139	0.182	-6.41361	-0.167425	10.3955	-1.73582	0.116	0.15	-6.35973	-0.164839	10.7627	-1.42793	0.189	0.236	-6.74796	0	1	0	0	1	0	0	1	0
69380	114883	OSBPL9	NM_148908	1	0	51855351	52026723	51855370	52026048	-0.137943	10.7805	-1.44579	0.171	0.365	-6.45768	1.43524	11.9503	6.31229	0.00257	0.125292	-0.876335	2336099	0.181139	11.3513	1.65153	0.139	0.182	-6.41361	-0.167425	10.3955	-1.73582	0.116	0.15	-6.35973	-0.164839	10.7627	-1.42793	0.189	0.236	-6.74796	0	1	0	0	1	0	0	1	0
69380	114883	OSBPL9	NM_148909	1	0	51855351	52026723	51855370	52026048	-0.137943	10.7805	-1.44579	0.171	0.365	-6.45768	1.43524	11.9503	6.31229	0.00257	0.125292	-0.876335	2336099	0.181139	11.3513	1.65153	0.139	0.182	-6.41361	-0.167425	10.3955	-1.73582	0.116	0.15	-6.35973	-0.164839	10.7627	-1.42793	0.189	0.236	-6.74796	0	1	0	0	1	0	0	1	0
69380	114883	OSBPL9	NM_148906	1	0	51855351	52026723	51988407	52026048	-0.137943	10.7805	-1.44579	0.171	0.365	-6.45768	-1000	-1000	-1000	-1000	-1000	-1000	2336099	0.181139	11.3513	1.65153	0.139	0.182	-6.41361	-0.167425	10.3955	-1.73582	0.116	0.15	-6.35973	-0.164839	10.7627	-1.42793	0.189	0.236	-6.74796	0	1	0	0	1	0	0	1	0
69380	114883	OSBPL9	NM_148904	1	0	51968080	52026723	51988407	52026048	-0.137943	10.7805	-1.44579	0.171	0.365	-6.45768	1.43524	11.9503	6.31229	0.00257	0.125292	-0.876335	2336099	0.181139	11.3513	1.65153	0.139	0.182	-6.41361	-0.167425	10.3955	-1.73582	0.116	0.15	-6.35973	-0.164839	10.7627	-1.42793	0.189	0.236	-6.74796	0	1	0	0	1	0	0	1	0
69380	114883	OSBPL9	NM_148905	1	0	51968080	52026723	51988407	52026048	-0.137943	10.7805	-1.44579	0.171	0.365	-6.45768	-1000	-1000	-1000	-1000	-1000	-1000	2336099	0.181139	11.3513	1.65153	0.139	0.182	-6.41361	-0.167425	10.3955	-1.73582	0.116	0.15	-6.35973	-0.164839	10.7627	-1.42793	0.189	0.236	-6.74796	0	1	0	0	1	0	0	1	0
69380	114883	OSBPL9	NM_148907	1	0	51968110	52026723	51968234	52026048	-0.137943	10.7805	-1.44579	0.171	0.365	-6.45768	-1000	-1000	-1000	-1000	-1000	-1000	2336099	0.181139	11.3513	1.65153	0.139	0.182	-6.41361	-0.167425	10.3955	-1.73582	0.116	0.15	-6.35973	-0.164839	10.7627	-1.42793	0.189	0.236	-6.74796	0	1	0	0	1	0	0	1	0
68260	4898	NRD1	NM_002525	1	1	52027470	52117009	52027495	52116874	-1.16698	6.5115	-6.55809	1.6e-05	0.000152	2.77245	-0.0481457	10.9595	-0.201621	0.849	0.938932	-6.64513	2412529	-0.241217	10.473	-1.67426	0.135	0.176	-6.38235	-0.279192	10.5234	-3.61346	0.00546	0.00943	-3.31168	-0.213532	10.5588	-2.28151	0.0504	0.0719	-5.50591	0	0	1	0	1	0	0	1	0
2149	5865	RAB3B	NM_002867	1	1	52157424	52228935	52158186	52215376	0.13659	5.21397	1.17299	0.261	0.482	-6.79645	0.362612	7.63255	0.523163	0.627	0.822001	-6.50868	2412624	0.852604	5.77649	2.62146	-1000	-1000	-1000	0.312804	5.82048	1.18543	-1000	-1000	-1000	0.102019	6.12957	0.549248	-1000	-1000	-1000	0	1	0	0	1	0	0	1	0
41074	51060	TXNDC12	NM_015913	1	1	52258394	52293634	52259192	52293355	-0.14025	9.75398	-2.12084	0.0532	0.152	-5.42166	-0.542499	10.2144	-2.22671	0.0856	0.354924	-4.68668	2412668	0.0769387	10.3817	0.691522	0.51	0.563	-7.46723	-0.546325	10.0662	-4.16866	0.00232	0.00436	-2.41247	-0.479377	10.2641	-3.71188	0.00545	0.00971	-3.21741	0	0	1	0	0	1	0	1	0
6347	112970	KTI12	NM_138417	1	1	52270364	52272059	52270956	52272020	1.02793	8.33756	10.9047	4.97e-08	1.41e-06	8.77955	-0.110423	7.28368	-0.388556	0.716	0.873724	-6.57963	2412690	1.021	9.53753	10.0378	1.23e-05	7.67e-05	3.56114	0.538066	8.88902	2.81822	0.0198	0.0304	-4.63668	0.494827	9.6788	4.97555	0.000938	0.00207	-1.33782	1	0	0	1	0	0	1	0	0
40477	91408	BTF3L4	NM_152265	1	0	52294560	52326649	52298107	52325017	0.257524	8.55927	3.40376	0.00454	0.0194	-3.0327	-1000	-1000	-1000	-1000	-1000	-1000	2336271	0.284587	10.5299	1.89819	0.0963	0.131	-6.06493	-0.340242	8.74131	-1.98507	0.0778	0.105	-5.98752	-0.368963	10.523	-2.20395	0.0571	0.0805	-5.62733	0	1	0	0	1	0	0	1	0
3527	9372	ZFYVE9	NM_007323	1	0	52380633	52502305	52471466	52502142	0.212788	7.37651	2.18731	0.047	0.138	-5.30788	-0.675259	4.36402	-2.18503	0.0899	0.36044	-4.73797	2336302	1.11613	7.49504	5.88407	0.000456	0.00124	-0.406902	0.666725	7.83114	5.6607	0.000289	0.000683	-0.189613	0.525907	7.40184	4.59541	0.00155	0.0032	-1.88067	1	0	0	1	0	0	1	0	0
3527	9372	ZFYVE9	NM_004799	1	0	52380633	52584944	52471466	52584480	0.212788	7.37651	2.18731	0.047	0.138	-5.30788	-0.940169	8.14226	-3.1913	0.0302	0.243748	-3.55337	2336302	1.11613	7.49504	5.88407	0.000456	0.00124	-0.406902	0.666725	7.83114	5.6607	0.000289	0.000683	-0.189613	0.525907	7.40184	4.59541	0.00155	0.0032	-1.88067	1	0	0	1	0	0	1	0	0
3527	9372	ZFYVE9	NM_007324	1	0	52380633	52584944	52471466	52584480	0.212788	7.37651	2.18731	0.047	0.138	-5.30788	-0.940169	8.14226	-3.1913	0.0302	0.243748	-3.55337	2336302	1.11613	7.49504	5.88407	0.000456	0.00124	-0.406902	0.666725	7.83114	5.6607	0.000289	0.000683	-0.189613	0.525907	7.40184	4.59541	0.00155	0.0032	-1.88067	1	0	0	1	0	0	1	0	0
70951	200014	CC2D1B	NM_032449	1	1	52588854	52604451	52591778	52602879	-0.390828	7.09959	-5.21661	0.000152	0.00104	0.435823	0.54357	8.16611	2.26303	0.0821	0.349044	-4.64207	2412740	-1.1056	8.82058	-8.96296	2.72e-05	0.000133	2.68799	-1.04091	9.7479	-9.39146	5.28e-06	2.47e-05	4.13083	-0.799266	8.46675	-6.72099	0.000119	0.000354	0.897782	0	0	1	0	0	1	0	0	1
31221	4998	ORC1L	NM_004153	1	1	52611089	52642718	52611440	52640482	1.6285	6.63146	16.9716	1.97e-10	2.73e-08	14.4348	-1.15197	7.80687	-4.35585	0.0104	0.173179	-2.38232	2412799	1.93843	8.85297	15.5605	5.13e-07	1.1e-05	6.99149	1.67956	7.72719	9.83391	3.59e-06	1.83e-05	4.54901	1.62701	8.20847	14.4993	3.07e-07	5.4e-06	7.35136	1	0	0	1	0	0	1	0	0
13146	84950	PRPF38A	NM_032864	1	0	52642823	52656437	52643009	52654949	0.733931	8.3084	6.74706	1.19e-05	0.000118	3.08191	-0.314772	9.9591	-1.39496	0.231	0.528287	-5.69915	2336383	0.554487	10.7234	5.42834	0.000755	0.0019	-0.959532	0.106747	9.98599	1.11682	0.292	0.342	-7.15432	-0.0459613	10.6298	-0.472628	0.649	0.695	-7.64421	0	1	0	0	1	0	1	0	0
13146	84950	PRPF38A	NM_032284	1	0	52642887	52655283	52650836	52654949	-1000	-1000	-1000	-1000	-1000	-1000	-0.0545427	9.4754	-0.241011	0.821	0.925374	-6.63467	-1000	-1000	-1000	-1000	-1000	-1000	-1000	-1000	-1000	-1000	-1000	-1000	-1000	-1000	-1000	-1000	-1000	-1000	-1000	0	1	0	0	1	0	0	1	0
35279	23318	ZCCHC11	NM_001009881	1	1	52661537	52791330	52662194	52764539	-0.0285859	3.47282	-0.546415	0.594	0.776	-7.33981	0.481657	9.36715	1.0153	0.364	0.636209	-6.10994	2412834	-0.460598	4.7178	-0.898033	-1000	-1000	-1000	-0.608123	4.45675	-1.46477	-1000	-1000	-1000	-0.509531	4.88411	-1.01145	-1000	-1000	-1000	0	1	0	0	1	0	0	1	0
35279	23318	ZCCHC11	NM_001009882	1	1	52661537	52791330	52662194	52764539	-0.0285859	3.47282	-0.546415	0.594	0.776	-7.33981	0.481657	9.36715	1.0153	0.364	0.636209	-6.10994	2412834	-0.460598	4.7178	-0.898033	-1000	-1000	-1000	-0.608123	4.45675	-1.46477	-1000	-1000	-1000	-0.509531	4.88411	-1.01145	-1000	-1000	-1000	0	1	0	0	1	0	0	1	0
35279	23318	ZCCHC11	NM_015269	1	1	52661537	52791330	52662194	52764539	-0.0285859	3.47282	-0.546415	0.594	0.776	-7.33981	0.481657	9.36715	1.0153	0.364	0.636209	-6.10994	2412834	-0.460598	4.7178	-0.898033	-1000	-1000	-1000	-0.608123	4.45675	-1.46477	-1000	-1000	-1000	-0.509531	4.88411	-1.01145	-1000	-1000	-1000	0	1	0	0	1	0	0	1	0
90937	2882	GPX7	NM_015696	1	0	52840631	52847309	52840669	52846684	-0.0382437	4.98567	-0.515623	0.615	0.79	-7.35696	0.347318	6.25917	0.914739	0.409	0.672418	-6.20634	2336439	0.170345	6.40052	0.581056	-1000	-1000	-1000	0.136319	6.62	0.505247	-1000	-1000	-1000	0.153606	6.2303	0.424139	-1000	-1000	-1000	0	1	0	0	1	0	0	1	0
-1	-1	MGC52498	NM_001042693	1	0	52871653	52895323	52871753	52895299	-1000	-1000	-1000	-1000	-1000	-1000	-1000	-1000	-1000	-1000	-1000	-1000	2336456	0.529813	6.59283	1.38584	-1000	-1000	-1000	0.0689282	6.1831	0.393126	-1000	-1000	-1000	0.0498695	6.24502	0.206069	-1000	-1000	-1000	0	1	0	0	1	0	0	1	0
11317	65260	C1orf163	NM_023077	1	1	52925101	52936625	52925979	52936585	1.81736	7.29898	14.3038	1.73e-09	1.2e-07	12.234	-0.907783	9.45731	-2.92135	0.0398	0.268279	-3.85737	-1000	-1000	-1000	-1000	-1000	-1000	-1000	-1000	-1000	-1000	-1000	-1000	-1000	-1000	-1000	-1000	-1000	-1000	-1000	0	1	0	0	1	0	0	1	0
14600	79699	ZYG11B	NM_024646	1	0	52964768	53063912	52964913	53059888	0.192371	4.35806	2.20045	0.0459	0.135	-5.2852	1.40058	7.32178	4.05367	0.0135	0.185509	-2.66433	2336497	-0.259427	8.90972	-2.10159	0.0708	0.0997	-5.7647	0.0890615	7.46513	0.79511	0.447	0.497	-7.46323	-0.0612897	7.98592	-0.465412	0.653	0.7	-7.6479	0	1	0	0	1	0	0	1	0
23088	55268	ECHDC2	NM_018281	1	1	53134492	53159985	53134779	53159932	-0.314502	5.96868	-4.84617	0.000295	0.00185	-0.250429	1.13122	11.223	4.47701	0.00946	0.167847	-2.27336	2413032	0.606916	6.10188	2.36876	-1000	-1000	-1000	-0.024533	6.80396	-0.114897	-1000	-1000	-1000	-0.148757	6.72328	-0.6594	-1000	-1000	-1000	0	1	0	0	1	0	0	1	0
37717	6342	SCP2	NM_001007098	1	0	53165535	53232489	53165656	53231536	-0.458005	8.8409	-2.98377	0.0103	0.0391	-3.84549	0.0613453	5.64099	0.140727	0.894	0.959563	-6.6577	2336585	0.364471	6.82626	2.2163	0.0594	0.0855	-5.59176	0.113823	6.22451	0.527519	-1000	-1000	-1000	0.171317	7.57757	0.497245	0.632	0.68	-7.63124	0	1	0	0	1	0	0	1	0
37717	6342	SCP2	NM_002979	1	0	53165535	53289869	53165656	53288963	-0.458005	8.8409	-2.98377	0.0103	0.0391	-3.84549	0.703564	11.2917	2.76141	0.0472	0.285517	-4.04287	2336585	0.364471	6.82626	2.2163	0.0594	0.0855	-5.59176	0.113823	6.22451	0.527519	-1000	-1000	-1000	0.171317	7.57757	0.497245	0.632	0.68	-7.63124	0	1	0	0	1	0	0	1	0
37717	6342	SCP2	NM_001007250	1	0	53253197	53289869	53253280	53286170	-0.458005	8.8409	-2.98377	0.0103	0.0391	-3.84549	0.703564	11.2917	2.76141	0.0472	0.285517	-4.04287	2336585	0.364471	6.82626	2.2163	0.0594	0.0855	-5.59176	0.113823	6.22451	0.527519	-1000	-1000	-1000	0.171317	7.57757	0.497245	0.632	0.68	-7.63124	0	1	0	0	1	0	0	1	0
37717	6342	SCP2	NM_001007099	1	0	53253197	53289869	53253280	53288963	-0.458005	8.8409	-2.98377	0.0103	0.0391	-3.84549	0.703564	11.2917	2.76141	0.0472	0.285517	-4.04287	2336585	0.364471	6.82626	2.2163	0.0594	0.0855	-5.59176	0.113823	6.22451	0.527519	-1000	-1000	-1000	0.171317	7.57757	0.497245	0.632	0.68	-7.63124	0	1	0	0	1	0	0	1	0
37717	6342	SCP2	NM_001007100	1	0	53253197	53289869	53253280	53288963	-0.458005	8.8409	-2.98377	0.0103	0.0391	-3.84549	0.703564	11.2917	2.76141	0.0472	0.285517	-4.04287	2336585	0.364471	6.82626	2.2163	0.0594	0.0855	-5.59176	0.113823	6.22451	0.527519	-1000	-1000	-1000	0.171317	7.57757	0.497245	0.632	0.68	-7.63124	0	1	0	0	1	0	0	1	0
17803	127435	PODN	NM_153703	1	0	53300472	53323760	53300479	53320420	0.163761	6.15178	1.73824	0.105	0.257	-6.03897	-0.163037	2.53282	-0.493835	0.646	0.832811	-6.52574	2336650	0.234429	6.02373	0.943758	-1000	-1000	-1000	0.170188	6.06104	1.37282	-1000	-1000	-1000	-0.310004	6.14138	-1.40904	-1000	-1000	-1000	0	1	0	0	1	0	0	1	0
21327	6512	SLC1A7	NM_006671	1	1	53325443	53380836	53326268	53380708	0.174263	6.82718	1.84155	0.0878	0.224	-5.87926	-0.31254	7.15243	-1.07298	0.34	0.617243	-6.0519	2413115	0.0988003	6.42802	0.284645	-1000	-1000	-1000	0.119397	6.60906	0.559879	-1000	-1000	-1000	-0.16394	6.63925	-0.74797	-1000	-1000	-1000	0	1	0	0	1	0	0	1	0
77	1376	CPT2	NM_000098	1	0	53434688	53452454	53435203	53451854	-0.25864	7.27411	-2.2852	0.0392	0.119	-5.13737	-0.375834	9.0678	-1.29375	0.261	0.554283	-5.81449	2413153	0.704533	11.1275	5.50206	0.000695	0.00177	-0.86821	0.572834	11.0639	4.35807	0.00175	0.00338	-2.11367	-0.243152	8.98083	-2.81425	0.0216	0.0334	-4.6534	1	0	0	0	0	1	1	0	0
41206	54987	C1orf123	NM_017887	1	1	53452361	53458876	53452918	53458834	0.11584	8.70922	1.62493	0.128	0.296	-6.20736	-0.51319	9.39227	-2.21689	0.0866	0.355905	-4.69876	-1000	-1000	-1000	-1000	-1000	-1000	-1000	-1000	-1000	-1000	-1000	-1000	-1000	-1000	-1000	-1000	-1000	-1000	-1000	0	1	0	0	1	0	0	1	0
1776	4116	MAGOH	NM_002370	1	1	53465153	53476794	53465304	53476707	1.01807	10.2263	9.4238	2.84e-07	5.57e-06	6.97179	-0.263476	9.8118	-1.14879	0.311	0.593928	-5.97291	2413180	1.38878	10.3663	4.88647	0.00143	0.00328	-1.65418	1.1878	10.3771	4.49019	0.00144	0.00285	-1.90794	0.382604	11.2355	4.27157	0.00243	0.00473	-2.35896	1	0	0	1	0	0	1	0	0
31250	7804	LRP8	NM_033300	1	1	53483799	53566408	53485277	53566171	0.466997	7.74034	2.93052	0.0114	0.0427	-3.9473	-0.784732	8.09576	-2.10576	0.0985	0.373408	-4.83575	2413203	1.36158	9.00252	11.4044	4.93e-06	4.22e-05	4.5557	1.33933	10.4192	9.67851	4.1e-06	2.03e-05	4.404	1.088	8.3321	15.6536	1.65e-07	3.69e-06	8.01323	1	0	0	1	0	0	1	0	0
31250	7804	LRP8	NM_001018054	1	1	53483804	53566313	53485277	53566171	0.466997	7.74034	2.93052	0.0114	0.0427	-3.9473	-0.784732	8.09576	-2.10576	0.0985	0.373408	-4.83575	2413203	1.36158	9.00252	11.4044	4.93e-06	4.22e-05	4.5557	1.33933	10.4192	9.67851	4.1e-06	2.03e-05	4.404	1.088	8.3321	15.6536	1.65e-07	3.69e-06	8.01323	1	0	0	1	0	0	1	0	0
31250	7804	LRP8	NM_004631	1	1	53483804	53566313	53485277	53566171	0.466997	7.74034	2.93052	0.0114	0.0427	-3.9473	-0.784732	8.09576	-2.10576	0.0985	0.373408	-4.83575	2413203	1.36158	9.00252	11.4044	4.93e-06	4.22e-05	4.5557	1.33933	10.4192	9.67851	4.1e-06	2.03e-05	4.404	1.088	8.3321	15.6536	1.65e-07	3.69e-06	8.01323	1	0	0	1	0	0	1	0	0
31250	7804	LRP8	NM_017522	1	1	53483804	53566313	53485277	53566171	0.466997	7.74034	2.93052	0.0114	0.0427	-3.9473	-0.784732	8.09576	-2.10576	0.0985	0.373408	-4.83575	2413203	1.36158	9.00252	11.4044	4.93e-06	4.22e-05	4.5557	1.33933	10.4192	9.67851	4.1e-06	2.03e-05	4.404	1.088	8.3321	15.6536	1.65e-07	3.69e-06	8.01323	1	0	0	1	0	0	1	0	0
13207	63948	DMRTB1	NM_033067	1	0	53697659	53705745	53697714	53704922	0.0650204	5.64117	0.937517	0.365	0.592	-7.04197	-1.91843	2.09178	-3.58135	0.0207	0.213546	-3.13557	2336809	-0.560881	6.12965	-2.02545	-1000	-1000	-1000	-0.162851	6.14072	-1.05299	-1000	-1000	-1000	0.168937	5.72697	0.35723	-1000	-1000	-1000	0	1	0	0	1	0	0	1	0
77390	148979	GLIS1	NM_147193	1	1	53744493	53972464	53744879	53833162	0.0942745	6.36909	1.22362	0.242	0.459	-6.73776	1.15583	6.65362	4.31097	0.0108	0.175056	-2.42326	2413332	0.045238	5.16423	0.0786956	-1000	-1000	-1000	-0.317215	5.3544	-1.64485	-1000	-1000	-1000	0.59015	4.6849	0.894395	-1000	-1000	-1000	0	1	0	0	1	0	0	1	0
41224	55706	TMEM48	NM_018087	1	1	54005977	54076762	54006230	54076521	2.09444	10.0613	21.8926	7.32e-12	4.08e-09	17.6803	-0.0248317	10.8409	-0.0815671	0.939	0.978153	-6.66566	2413423	2.27405	10.2212	21.6183	4.48e-08	3.99e-06	9.52231	2.10371	8.21401	12.0405	6.33e-07	5.2e-06	6.41564	1.75973	9.0524	9.45418	9.22e-06	4.93e-05	3.68369	1	0	0	1	0	0	1	0	0
5898	54432	YIPF1	NM_018982	1	1	54089994	54128040	54098324	54127197	-0.58037	7.82901	-7.88793	2.18e-06	2.89e-05	4.84855	-0.182902	9.24067	-0.647204	0.551	0.77418	-6.42722	2413484	-0.870522	9.12055	-8.80112	3.09e-05	0.000146	2.54862	-0.911583	8.15075	-9.33933	5.53e-06	2.56e-05	4.08046	-1.01989	9.06325	-14.1857	3.67e-07	5.98e-06	7.16229	0	0	1	0	0	1	0	0	1
620	1733	DIO1	NM_001039716	1	0	54132448	54149345	54132471	54148195	-0.0171085	4.09046	-0.330525	0.746	0.872	-7.43972	-0.509256	2.25632	-1.12329	0.32	0.600953	-5.99981	2336891	0.670122	5.28355	2.475	-1000	-1000	-1000	-0.0700212	4.70449	-0.446696	-1000	-1000	-1000	-0.0207218	5.04447	-0.0766456	-1000	-1000	-1000	0	1	0	0	1	0	0	1	0
620	1733	DIO1	NM_000792	1	0	54132448	54149345	54132471	54148259	-0.0171085	4.09046	-0.330525	0.746	0.872	-7.43972	-0.509256	2.25632	-1.12329	0.32	0.600953	-5.99981	2336891	0.670122	5.28355	2.475	-1000	-1000	-1000	-0.0700212	4.70449	-0.446696	-1000	-1000	-1000	-0.0207218	5.04447	-0.0766456	-1000	-1000	-1000	0	1	0	0	1	0	0	1	0
620	1733	DIO1	NM_001039715	1	0	54132448	54149345	54132471	54148259	-0.0171085	4.09046	-0.330525	0.746	0.872	-7.43972	-0.509256	2.25632	-1.12329	0.32	0.600953	-5.99981	2336891	0.670122	5.28355	2.475	-1000	-1000	-1000	-0.0700212	4.70449	-0.446696	-1000	-1000	-1000	-0.0207218	5.04447	-0.0766456	-1000	-1000	-1000	0	1	0	0	1	0	0	1	0
620	1733	DIO1	NM_213593	1	0	54132448	54149345	54132471	54148259	-0.0171085	4.09046	-0.330525	0.746	0.872	-7.43972	-0.509256	2.25632	-1.12329	0.32	0.600953	-5.99981	2336891	0.670122	5.28355	2.475	-1000	-1000	-1000	-0.0700212	4.70449	-0.446696	-1000	-1000	-1000	-0.0207218	5.04447	-0.0766456	-1000	-1000	-1000	0	1	0	0	1	0	0	1	0
22947	51668	C1orf41	NM_016126	1	1	54159823	54183875	54159911	54178342	-1.34037	5.59325	-7.34776	4.76e-06	5.53e-05	4.03347	-0.352603	11.0947	-1.09103	0.333	0.611508	-6.03336	2413519	-0.542478	9.52061	-4.40119	0.00261	0.00551	-2.31187	-0.109904	9.01054	-1.15744	0.276	0.325	-7.10951	-0.132464	11.3721	-1.73174	0.12	0.156	-6.33542	0	1	0	0	1	0	0	0	1
12685	115353	LRRC42	NM_052940	1	0	54184624	54206426	54190260	54206199	0.692261	7.88504	5.82944	5.26e-05	0.000421	1.53334	0.208851	11.3672	0.629843	0.561	0.780606	-6.4395	2336913	0.839015	9.34312	7.216	0.00012	0.000421	1.0567	0.431062	9.0631	5.3388	0.000441	0.00099	-0.64311	0.344734	9.67812	3.34993	0.0094	0.0158	-3.79051	1	0	0	1	0	0	1	0	0
54473	388633	LDLRAD1	NM_001010978	1	1	54247093	54256390	54247242	54256372	-1000	-1000	-1000	-1000	-1000	-1000	-0.869493	4.01429	-2.19127	0.0892	0.359326	-4.73028	-1000	-1000	-1000	-1000	-1000	-1000	-1000	-1000	-1000	-1000	-1000	-1000	-1000	-1000	-1000	-1000	-1000	-1000	-1000	0	1	0	0	1	0	0	1	0
3583	9528	TMEM59	NM_004872	1	1	54269938	54291698	54270410	54291448	-0.826595	9.434	-8.44049	1.01e-06	1.55e-05	5.64433	0.57939	11.4573	2.39166	0.0709	0.331947	-4.48488	2413578	-0.79861	10.5817	-7.40924	0.000101	0.000367	1.25197	-1.01768	10.4374	-11.7514	7.82e-07	6.06e-06	6.18971	-0.947917	11.3655	-13.9881	4.11e-07	6.39e-06	7.04098	0	0	1	0	0	1	0	0	1
11984	127428	C1orf83	NM_153035	1	0	54291861	54338003	54292683	54334733	-0.057274	3.54261	-0.948651	0.36	0.587	-7.03142	0.164463	6.45846	0.5289	0.623	0.820057	-6.50524	2336963	-0.0464853	9.25149	-0.391482	0.706	0.746	-7.64349	-0.104918	8.03249	-0.626942	0.546	0.593	-7.58862	-0.0548155	8.48867	-0.38522	0.71	0.752	-7.68518	0	1	0	0	1	0	0	1	0
18245	200008	CDCP2	NM_201546	1	1	54377255	54392030	54377780	54391182	-1000	-1000	-1000	-1000	-1000	-1000	-0.214852	3.37303	-0.456791	0.67	0.846586	-6.54603	2413633	1.00006	6.97026	4.27979	0.00306	0.00632	-2.48165	0.552666	6.70076	2.27851	-1000	-1000	-1000	0.544075	6.42469	2.44246	-1000	-1000	-1000	0	1	0	0	1	0	1	0	0
45506	606495	LOC606495	NM_001031672	1	1	54424414	54438272	54425985	54433831	0.296108	5.8184	2.96626	0.0106	0.0402	-3.87902	-1000	-1000	-1000	-1000	-1000	-1000	2413633	1.00006	6.97026	4.27979	0.00306	0.00632	-2.48165	0.552666	6.70076	2.27851	-1000	-1000	-1000	0.544075	6.42469	2.44246	-1000	-1000	-1000	0	1	0	0	1	0	1	0	0
9536	51253	MRPL37	NM_016491	1	0	54438427	54456637	54438504	54456509	1.51814	9.62175	16.4524	2.93e-10	3.61e-08	14.0351	-0.452764	11.1134	-2.01715	0.109	0.387957	-4.94525	2337003	1.79291	10.9804	16.7403	2.99e-07	8.18e-06	7.56133	1.47312	10.6845	6.61202	8.99e-05	0.000248	1.06794	0.877992	11.274	7.36631	6.11e-05	0.000205	1.62581	1	0	0	1	0	0	1	0	0
23411	23648	SSBP3	NM_018070	1	1	54464783	54644566	54465391	54644268	-0.512165	8.99486	-4.26522	0.000866	0.00467	-1.3559	-0.929189	8.63908	-2.8716	0.042	0.273587	-3.91466	2413685	-0.454734	10.1209	-3.20293	0.0135	0.0232	-4.07024	-0.40739	9.72917	-3.5376	0.00616	0.0105	-3.43682	-0.514233	10.8472	-4.26636	0.00245	0.00475	-2.36676	0	0	1	0	0	1	0	0	1
23411	23648	SSBP3	NM_145716	1	1	54464783	54644566	54465391	54644268	-0.512165	8.99486	-4.26522	0.000866	0.00467	-1.3559	-0.929189	8.63908	-2.8716	0.042	0.273587	-3.91466	2413685	-0.454734	10.1209	-3.20293	0.0135	0.0232	-4.07024	-0.40739	9.72917	-3.5376	0.00616	0.0105	-3.43682	-0.514233	10.8472	-4.26636	0.00245	0.00475	-2.36676	0	0	1	0	0	1	0	0	1
23411	23648	SSBP3	NM_001009955	1	1	54464783	54644679	54465391	54644268	-0.512165	8.99486	-4.26522	0.000866	0.00467	-1.3559	-0.929189	8.63908	-2.8716	0.042	0.273587	-3.91466	2413685	-0.454734	10.1209	-3.20293	0.0135	0.0232	-4.07024	-0.40739	9.72917	-3.5376	0.00616	0.0105	-3.43682	-0.514233	10.8472	-4.26636	0.00245	0.00475	-2.36676	0	0	1	0	0	1	0	0	1
-1	619518	C1orf191	NM_001034847	1	0	54476297	54477322	54476327	54476629	-1000	-1000	-1000	-1000	-1000	-1000	-1000	-1000	-1000	-1000	-1000	-1000	-1000	-1000	-1000	-1000	-1000	-1000	-1000	-1000	-1000	-1000	-1000	-1000	-1000	-1000	-1000	-1000	-1000	-1000	-1000	0	1	0	0	1	0	0	1	0
11977	26027	ACOT11	NM_147161	1	0	54786488	54848587	54786570	54847372	0.0565448	6.89545	0.581916	0.57	0.76	-7.31885	-0.349426	7.16294	-0.904582	0.414	0.675688	-6.21572	2413846	0.00119867	7.53748	0.00624056	0.995	0.996	-7.72919	-0.359849	7.14261	-2.32186	0.0448	0.0641	-5.45528	-0.192253	7.02154	-1.30143	0.228	0.278	-6.90571	0	1	0	0	1	0	0	1	0
11977	26027	ACOT11	NM_015547	1	0	54786488	54873004	54786570	54872989	0.0565448	6.89545	0.581916	0.57	0.76	-7.31885	-0.128141	4.98642	-0.511608	0.634	0.826126	-6.5155	2337147	0.0842347	5.96698	0.232321	-1000	-1000	-1000	0.0579187	6.01994	0.296435	-1000	-1000	-1000	0.0158467	5.34259	0.045426	-1000	-1000	-1000	0	1	0	0	1	0	0	1	0
17143	338094	C1orf179	NM_176782	1	1	54847441	54861785	54847528	54861655	-0.0646534	6.67461	-0.551889	0.59	0.774	-7.33666	0.325552	5.7248	0.512156	0.634	0.826027	-6.51518	2413846	0.00119867	7.53748	0.00624056	0.995	0.996	-7.72919	-0.359849	7.14261	-2.32186	0.0448	0.0641	-5.45528	-0.192253	7.02154	-1.30143	0.228	0.278	-6.90571	0	1	0	0	1	0	0	1	0
19633	374977	C1orf175	NM_001039464	1	0	54880031	54948526	54891187	54948447	0.0696788	5.27701	0.702813	0.494	0.703	-7.23815	0.118001	5.86248	0.313402	0.769	0.90049	-6.61074	2337217	0.207354	6.39283	0.884263	-1000	-1000	-1000	0.193903	6.15951	1.26419	-1000	-1000	-1000	0.258653	6.19294	1.19999	-1000	-1000	-1000	0	1	0	0	1	0	0	1	0
31249	7268	TTC4	NM_004623	1	0	54954143	54980567	54954169	54979773	0.996558	8.46046	10.3657	9.16e-08	2.26e-06	8.14629	-0.395282	6.79089	-0.809247	0.461	0.711923	-6.30013	2337285	1.34553	9.69555	11.4906	4.67e-06	4.06e-05	4.61462	0.922168	8.76062	4.77585	0.000957	0.00197	-1.47107	0.801172	9.27668	6.56287	0.000141	0.00041	0.711803	1	0	0	1	0	0	1	0	0
5830	25973	PARS2	NM_152268	1	1	54995160	55002774	54995994	54997421	0.596021	7.12815	7.79084	2.5e-06	3.25e-05	4.70481	-0.466157	8.25158	-1.52199	0.198	0.494005	-5.55015	2413879	0.140042	9.99475	0.374201	0.719	0.757	-7.65082	0.109303	12.2661	0.371271	0.719	0.755	-7.72594	-1.37171	7.24379	-1.25355	0.244	0.296	-6.9629	0	1	0	0	1	0	0	1	0
88848	55001	TTC22	NM_017904	1	1	55022812	55039458	55023806	55039423	0.0722959	4.05131	1.10264	0.29	0.515	-6.87462	-0.687631	5.93737	-1.47736	0.209	0.506356	-5.60296	2413886	0.0490513	6.24801	0.169498	-1000	-1000	-1000	0.506042	6.10167	1.62512	-1000	-1000	-1000	0.722811	6.2861	1.56387	-1000	-1000	-1000	0	1	0	0	1	0	0	1	0
17630	163747	C1orf177	NM_152607	1	0	55044323	55080510	55044377	55079936	-0.320202	5.95399	-2.832	0.0138	0.0503	-4.13459	-0.0756727	6.30731	-0.19512	0.854	0.941391	-6.64669	2337327	0.392092	6.23841	1.62485	-1000	-1000	-1000	0.150376	5.86664	0.882411	-1000	-1000	-1000	-0.0607977	6.05481	-0.291723	-1000	-1000	-1000	0	1	0	0	1	0	0	1	0
8850	1718	DHCR24	NM_014762	1	1	55087887	55125508	55090493	55125379	0.989691	9.59878	7.37232	4.59e-06	5.36e-05	4.07135	-1.27925	11.0253	-4.93729	0.00659	0.155141	-1.87997	2413907	1.42899	10.1358	9.34495	2.03e-05	0.000109	3.00844	1.09253	10.8094	5.57357	0.000324	0.000754	-0.310934	1.0151	9.84616	9.41767	9.5e-06	5.05e-05	3.65111	1	0	0	1	0	0	1	0	0
52319	199964	TMEM61	NM_182532	1	0	55219052	55230552	55219326	55230363	-0.0607357	6.07549	-0.623271	0.544	0.741	-7.29285	0.288598	5.84873	1.11063	0.325	0.605009	-6.01304	2337369	0.149936	7.53329	1.26742	0.243	0.295	-6.90633	-0.409101	7.52978	-2.90855	0.017	0.0266	-4.48572	0.479849	7.49944	1.01244	0.34	0.396	-7.2272	0	0	1	0	1	0	0	1	0
14291	7809	BSND	NM_057176	1	0	55237204	55247051	55237447	55246888	-0.0962946	4.89023	-0.886315	0.391	0.617	-7.08906	-0.460921	6.56778	-1.52008	0.199	0.4945	-5.55241	2337392	1.4294	4.40271	2.75406	-1000	-1000	-1000	0.182285	4.30201	0.754968	-1000	-1000	-1000	-0.843179	4.38613	-1.37369	-1000	-1000	-1000	0	1	0	0	1	0	0	1	0
17790	255738	PCSK9	NM_174936	1	0	55277807	55303110	55278098	55301844	-0.0386217	6.35391	-0.368565	0.718	0.855	-7.4256	-4.88246	9.39929	-12.2238	0.000174	0.0997172	1.61795	2337407	-0.0873603	7.08674	-0.218183	0.833	0.86	-7.7024	0.618157	6.63629	1.95689	-1000	-1000	-1000	0.415611	6.30087	0.790853	-1000	-1000	-1000	0	1	0	0	1	0	0	1	0
-1	400754	FLJ45337	NM_207465	1	0	55819297	55973262	55969633	55970379	-1000	-1000	-1000	-1000	-1000	-1000	-1000	-1000	-1000	-1000	-1000	-1000	-1000	-1000	-1000	-1000	-1000	-1000	-1000	-1000	-1000	-1000	-1000	-1000	-1000	-1000	-1000	-1000	-1000	-1000	-1000	0	1	0	0	1	0	0	1	0
15410	8613	PPAP2B	NM_003713	1	1	56733022	56817844	56734810	56817276	0.0691153	4.18831	1.09673	0.292	0.518	-6.881	2.9566	10.0397	6.34468	0.00252	0.124589	-0.855425	2414366	-0.0021	6.64612	-0.00864474	-1000	-1000	-1000	-0.122955	6.80079	-0.6687	-1000	-1000	-1000	0.172639	6.51355	0.74625	-1000	-1000	-1000	0	1	0	0	1	0	0	1	0
15410	8613	PPAP2B	NM_177414	1	1	56733022	56817844	56734810	56817276	0.0691153	4.18831	1.09673	0.292	0.518	-6.881	2.9566	10.0397	6.34468	0.00252	0.124589	-0.855425	2414366	-0.0021	6.64612	-0.00864474	-1000	-1000	-1000	-0.122955	6.80079	-0.6687	-1000	-1000	-1000	0.172639	6.51355	0.74625	-1000	-1000	-1000	0	1	0	0	1	0	0	1	0
4551	5563	PRKAA2	NM_006252	1	0	56883607	56946708	56883648	56945973	-0.0628742	5.60249	-0.961772	0.353	0.58	-7.01885	0.676169	6.71158	1.84053	0.135	0.422861	-5.16337	2337716	0.34997	5.05876	1.16955	-1000	-1000	-1000	0.65854	4.28872	4.55053	-1000	-1000	-1000	-0.000398	4.62105	-0.00156637	-1000	-1000	-1000	0	1	0	0	1	0	0	1	0
52981	199920	C1orf168	NM_001004303	1	1	56957065	57057631	56957931	57057550	0.0519811	4.00949	0.882049	0.393	0.619	-7.09288	-0.171807	2.10105	-0.484392	0.652	0.836226	-6.53105	2414440	0.692732	4.066	1.95387	-1000	-1000	-1000	0.0056505	4.67716	0.0202039	-1000	-1000	-1000	0.286631	4.32521	0.824874	-1000	-1000	-1000	0	1	0	0	1	0	0	1	0
472	731	C8A	NM_000562	1	0	57093066	57156481	57093162	57155976	0.041613	6.06078	0.680991	0.508	0.713	-7.25377	-0.270885	3.314	-1.1892	0.296	0.582218	-5.92965	2337786	0.379975	4.75364	1.10858	-1000	-1000	-1000	0.178903	4.45582	0.972946	-1000	-1000	-1000	-0.0228267	4.90973	-0.111082	-1000	-1000	-1000	0	1	0	0	1	0	0	1	0
48	732	C8B	NM_000066	1	1	57167472	57204275	57167664	57204208	-0.102157	6.72596	-0.970627	0.349	0.576	-7.01028	-0.546045	2.01096	-1.26628	0.27	0.561722	-5.84517	2414505	0.282072	6.59658	1.20306	-1000	-1000	-1000	0.10425	6.61818	0.735005	-1000	-1000	-1000	0.356855	7.70601	2.94243	0.0177	0.0278	-4.44627	0	1	0	1	0	0	0	1	0
32084	1600	DAB1	NM_021080	1	1	57236166	58488798	57248955	57529289	-0.521218	8.21771	-4.39283	0.000682	0.00379	-1.11046	-0.209604	7.25274	-0.854552	0.438	0.693449	-6.26084	2414558	0.100048	5.00544	0.353297	-1000	-1000	-1000	0.183171	4.22266	0.941879	-1000	-1000	-1000	-0.429036	5.16395	-1.36692	-1000	-1000	-1000	0	1	0	0	1	0	0	1	0
12070	115209	OMA1	NM_145243	1	1	58718979	58785033	58719224	58777553	-0.521218	8.21771	-4.39283	0.000682	0.00379	-1.11046	-0.210142	8.94389	-0.775309	0.479	0.725943	-6.32853	2414558	0.100048	5.00544	0.353297	-1000	-1000	-1000	0.183171	4.22266	0.941879	-1000	-1000	-1000	-0.429036	5.16395	-1.36692	-1000	-1000	-1000	0	1	0	0	1	0	0	1	0
1763	4070	TACSTD2	NM_002353	1	1	58813230	58816032	58814444	58815415	0.0984527	5.89042	1.75654	0.102	0.251	-6.01109	4.81518	6.85406	13.0096	0.000134	0.0958918	1.81633	2414958	0.0131097	2.96465	0.0280024	-1000	-1000	-1000	0.218493	2.97858	0.83015	-1000	-1000	-1000	0.123259	2.85761	0.240481	-1000	-1000	-1000	0	1	0	0	1	0	0	1	0
1679	3725	JUN	NM_002228	1	1	59019052	59022372	59020334	59021329	-1.44249	8.27154	-5.49365	9.34e-05	0.000687	0.938059	-0.706016	10.2789	-1.86559	0.131	0.417486	-5.13249	2415084	-1.68234	8.41543	-12.5246	2.51e-06	2.7e-05	5.28994	-1.77688	9.22719	-15.249	7.98e-08	1.34e-06	8.62545	-1.32977	8.19841	-13.3487	6e-07	7.98e-06	6.63658	0	0	1	0	0	1	0	0	1
49535	55277	FLJ10986	NM_018291	1	0	59535327	60000985	59584529	60000843	-0.310707	6.48864	-3.64126	0.00286	0.013	-2.56913	-0.460863	7.73659	-1.70137	0.159	0.451831	-5.33397	2338487	-1.07773	7.20463	-6.64887	0.000207	0.000652	0.459588	-1.5291	7.36761	-12.9393	3.38e-07	3.39e-06	7.08708	-1.26768	7.99246	-14.7113	2.73e-07	5.01e-06	7.47683	0	0	1	0	0	1	0	0	1
9289	51361	HOOK1	NM_015888	1	0	60053120	60114636	60053377	60111224	-0.0488391	3.93167	-0.813474	0.43	0.652	-7.15198	-0.322833	8.018	-1.09654	0.331	0.610002	-6.02767	2338625	-0.588182	4.02198	-1.63366	-1000	-1000	-1000	-0.666477	3.62935	-1.79126	-1000	-1000	-1000	-0.352628	3.8294	-1.27145	-1000	-1000	-1000	0	1	0	0	1	0	0	1	0
68091	1573	CYP2J2	NM_000775	1	1	60131568	60165010	60131910	60165005	-0.248606	6.16351	-2.19055	0.0468	0.137	-5.30229	0.60688	5.77057	1.21155	0.288	0.575848	-5.90542	2415266	0.251657	3.94975	0.979663	-1000	-1000	-1000	0.38921	3.38571	1.03196	-1000	-1000	-1000	0.120971	4.01943	0.397864	-1000	-1000	-1000	0	1	0	0	1	0	0	1	0
51847	127795	C1orf87	NM_152377	1	1	60228654	60312013	60228932	60310902	0.0500579	4.95112	0.604275	0.556	0.749	-7.305	-0.549178	3.87792	-1.13211	0.317	0.598751	-5.99054	-1000	-1000	-1000	-1000	-1000	-1000	-1000	-1000	-1000	-1000	-1000	-1000	-1000	-1000	-1000	-1000	-1000	-1000	-1000	0	1	0	0	1	0	0	1	0
4086	4774	NFIA	NM_005595	1	0	61320882	61694616	61321051	61693638	-0.128342	6.1951	-1.5668	0.141	0.317	-6.29082	-1.31901	3.74677	-3.02194	0.0359	0.258475	-3.74272	2338719	-0.103838	6.19563	-0.391798	-1000	-1000	-1000	-0.0010855	6.16764	-0.00748853	-1000	-1000	-1000	0.427897	5.8982	1.62353	-1000	-1000	-1000	0	1	0	0	1	0	0	1	0
12928	83941	TM2D1	NM_032027	1	1	61919306	61963682	61921695	61963379	-0.724037	4.79853	-5.71166	6.42e-05	0.0005	1.32627	1.07881	10.1366	2.42728	0.0681	0.328439	-4.44161	2415728	0.0978183	8.00367	0.337666	0.745	0.781	-7.66527	-0.719695	7.80998	-2.89272	0.0175	0.0272	-4.5122	-0.807866	7.97818	-2.64838	0.0281	0.0425	-4.92101	0	0	1	0	0	1	0	1	0
72199	10207	INADL	NM_176877	1	0	61980736	62402176	62001152	62399194	-0.111864	6.55256	-1.03901	0.317	0.544	-6.94184	1.4909	4.4443	6.19461	0.00277	0.126394	-0.953278	2339139	0.17197	5.69948	0.484261	-1000	-1000	-1000	0.539102	4.91666	3.21916	-1000	-1000	-1000	0.59979	5.0547	2.61545	-1000	-1000	-1000	0	1	0	0	1	0	0	1	0
49588	54596	L1TD1	NM_019079	1	0	62433123	62449805	62444888	62449631	0.143666	4.58487	1.26186	0.229	0.441	-6.69214	-0.666352	14.4619	-2.39153	0.0709	0.33196	-4.48504	2339334	0.31769	4.80269	0.799632	-1000	-1000	-1000	0.132158	4.52365	0.66025	-1000	-1000	-1000	-0.866854	4.53358	-1.98369	-1000	-1000	-1000	0	1	0	0	1	0	0	1	0
18244	163782	ANKRD38	NM_181712	1	1	62475408	62557670	62476536	62519823	-0.038894	5.63955	-0.440844	0.666	0.821	-7.39464	6.80385	7.20411	13.2458	0.000125	0.0958918	1.87204	2415837	0.291063	4.52625	0.402062	-1000	-1000	-1000	-0.302668	4.62942	-0.504055	-1000	-1000	-1000	0.110754	3.30384	0.153055	-1000	-1000	-1000	0	1	0	0	1	0	0	1	0
2528	7398	USP1	NM_001017415	1	0	62674562	62690060	62678126	62689239	1.07859	10.4082	11.6893	2.13e-08	7.49e-07	9.65525	-0.00182267	11.3287	-0.005237	0.996	0.998512	-6.66968	2339414	1.32719	10.4859	12.6906	2.28e-06	2.52e-05	5.39326	1.36832	8.46517	10.761	1.67e-06	1.03e-05	5.3749	0.746863	9.96205	5.45304	0.000512	0.00122	-0.684919	1	0	0	1	0	0	1	0	0
2528	7398	USP1	NM_001017416	1	0	62674562	62690060	62678126	62689239	1.07859	10.4082	11.6893	2.13e-08	7.49e-07	9.65525	-0.00182267	11.3287	-0.005237	0.996	0.998512	-6.66968	2339414	1.32719	10.4859	12.6906	2.28e-06	2.52e-05	5.39326	1.36832	8.46517	10.761	1.67e-06	1.03e-05	5.3749	0.746863	9.96205	5.45304	0.000512	0.00122	-0.684919	1	0	0	1	0	0	1	0	0
2528	7398	USP1	NM_003368	1	0	62674970	62690060	62678126	62689239	1.07859	10.4082	11.6893	2.13e-08	7.49e-07	9.65525	-0.00182267	11.3287	-0.005237	0.996	0.998512	-6.66968	2339414	1.32719	10.4859	12.6906	2.28e-06	2.52e-05	5.39326	1.36832	8.46517	10.761	1.67e-06	1.03e-05	5.3749	0.746863	9.96205	5.45304	0.000512	0.00122	-0.684919	1	0	0	1	0	0	1	0	0
23566	85440	DOCK7	NM_033407	1	1	62692986	62926556	62693672	62926522	0.637828	8.19278	5.17846	0.000162	0.0011	0.365912	0.703531	8.78374	2.14708	0.0939	0.367235	-4.78475	2415910	0.412682	10.0731	2.64232	0.0311	0.0484	-4.93669	0.188885	9.10068	1.90022	0.0893	0.119	-6.11671	0.300721	9.20279	2.51278	0.0349	0.0516	-5.13875	0	1	0	0	1	0	1	0	0
8499	27329	ANGPTL3	NM_014495	1	0	62835774	62843767	62835825	62843075	0.115259	4.25439	1.77183	0.0992	0.246	-5.98766	0.168806	1.94824	0.674029	0.535	0.764328	-6.40773	2339454	-0.532601	4.99196	-1.16026	-1000	-1000	-1000	-0.0507727	4.48827	-0.180354	-1000	-1000	-1000	-0.454212	5.26776	-1.22127	-1000	-1000	-1000	0	1	0	0	1	0	0	1	0
56296	84938	ATG4C	NM_032852	1	0	63022390	63102636	63042045	63102417	0.62916	7.54338	4.78046	0.000333	0.00204	-0.373795	-0.16081	8.27264	-0.580496	0.591	0.798722	-6.47286	2339511	1.04575	9.50721	8.57437	3.71e-05	0.000168	2.34961	0.722004	7.85411	3.48121	0.00673	0.0114	-3.53012	0.527906	9.63958	4.38825	0.00206	0.00411	-2.18499	1	0	0	1	0	0	1	0	0
56296	84938	ATG4C	NM_178221	1	0	63022390	63102636	63042045	63102417	0.62916	7.54338	4.78046	0.000333	0.00204	-0.373795	-0.16081	8.27264	-0.580496	0.591	0.798722	-6.47286	2339511	1.04575	9.50721	8.57437	3.71e-05	0.000168	2.34961	0.722004	7.85411	3.48121	0.00673	0.0114	-3.53012	0.527906	9.63958	4.38825	0.00206	0.00411	-2.18499	1	0	0	1	0	0	1	0	0
49239	27022	FOXD3	NM_012183	1	0	63561317	63562753	63561317	63562753	0.070255	4.63097	0.83484	0.418	0.642	-7.13403	-0.114795	9.64473	-0.421762	0.694	0.860829	-6.5639	2339658	0.695807	5.67204	1.8514	-1000	-1000	-1000	0.427245	5.49473	1.50575	-1000	-1000	-1000	1.05211	5.59298	2.17176	-1000	-1000	-1000	0	1	0	0	1	0	0	1	0
6920	29929	ALG6	NM_013339	1	0	63605885	63675463	63609236	63675278	0.242495	8.54301	3.20461	0.00669	0.0271	-3.41983	0.13186	8.67906	0.429386	0.688	0.857967	-6.56012	2339682	0.602326	9.00837	4.96714	0.00129	0.00302	-1.54811	0.521588	6.9218	2.27143	0.0487	0.0691	-5.5366	0.373842	7.76672	2.38068	0.0431	0.0624	-5.34929	0	1	0	0	1	0	1	0	0
8617	23421	ITGB3BP	NM_014288	1	1	63679049	63761422	63685065	63761391	0.66659	9.02098	6.66696	1.34e-05	0.000131	2.95132	-0.853873	9.23879	-3.56199	0.0211	0.21525	-3.15569	2416218	1.24857	8.90465	6.76091	0.000185	0.000594	0.580492	0.854035	7.12104	4.04635	0.00279	0.00514	-2.60772	0.804025	9.16155	5.14181	0.000757	0.00172	-1.10683	1	0	0	1	0	0	1	0	0
19952	84455	KIAA1799	NM_032437	1	0	63761855	63810950	63763831	63810774	-0.192014	5.76194	-0.995719	0.337	0.564	-6.98564	0.35301	6.00919	1.06078	0.345	0.620646	-6.06433	2339740	0.193342	7.7965	1.11214	0.3	0.357	-7.08204	0.119815	5.97205	0.585826	-1000	-1000	-1000	0.155063	7.5041	1.00984	0.341	0.397	-7.22982	0	1	0	0	1	0	0	1	0
1979	5236	PGM1	NM_002633	1	0	63831534	63898501	63831747	63897933	1.10901	8.45788	8.75134	6.71e-07	1.1e-05	6.07587	-1.09449	12.1988	-2.98297	0.0374	0.261643	-3.78695	2339786	1.40811	8.86865	13.6281	1.36e-06	1.87e-05	5.95259	0.319443	8.40398	2.53178	0.0317	0.0468	-5.11231	0.179739	9.30083	1.63259	0.139	0.179	-6.4747	1	0	0	0	1	0	1	0	0
3675	4919	ROR1	NM_005012	1	0	64012301	64417294	64012676	64417125	-0.694829	7.56184	-4.59434	0.000468	0.00274	-0.725706	-0.987288	8.71105	-4.29254	0.011	0.175821	-2.44017	2339872	-0.0405247	10.3289	-0.283678	0.784	0.817	-7.68399	-0.214402	10.9072	-1.53121	0.159	0.2	-6.64607	-0.246083	9.78754	-2.84809	0.0205	0.0318	-4.59872	0	1	0	0	0	1	0	1	0
17594	148581	UBE2U	NM_152489	1	0	64442077	64482614	64442321	64482403	0.11568	4.68203	1.99043	0.0674	0.183	-5.63969	-0.271871	3.10185	-0.893636	0.419	0.679018	-6.22574	2339997	0.470891	4.92373	1.28876	-1000	-1000	-1000	0.269286	5.11155	1.74613	-1000	-1000	-1000	0.997451	4.48802	2.51762	-1000	-1000	-1000	0	1	0	0	1	0	0	1	0
10854	57685	CACHD1	NM_020925	1	0	64709063	64931328	64709168	64929831	0.0846	4.68703	1.04004	0.317	0.543	-6.94079	-1.44261	6.32154	-2.39272	0.0708	0.33169	-4.4836	2340078	-0.076648	5.58092	-0.313077	-1000	-1000	-1000	0.0724013	5.23229	0.393246	-1000	-1000	-1000	-0.0905265	5.19062	-0.384831	-1000	-1000	-1000	0	1	0	0	1	0	0	1	0
18829	55225	RAVER2	NM_018211	1	0	64983365	65071499	64983443	65069255	1.40782	5.1624	9.35334	3.1e-07	5.99e-06	6.88024	-0.728609	6.96386	-2.69619	0.0506	0.293505	-4.11957	2340186	1.79993	9.04003	17.7215	1.96e-07	6.86e-06	8.00321	2.10528	7.64315	13.6894	2.07e-07	2.47e-06	7.61427	1.75945	8.02554	11.869	1.54e-06	1.44e-05	5.62306	1	0	0	1	0	0	1	0	0
1678	3716	JAK1	NM_002227	1	1	65071494	65204774	65072832	65124534	-0.716123	10.5077	-2.59396	0.0219	0.0739	-4.58001	-0.257885	8.97078	-1.07082	0.341	0.617721	-6.05411	2416522	-1.09251	11.8375	-9.50649	1.8e-05	9.98e-05	3.14049	-1.04278	10.888	-12.6572	4.1e-07	3.85e-06	6.88124	-1.09172	10.7658	-12.2783	1.17e-06	1.22e-05	5.91506	0	0	1	0	0	1	0	0	1
100316	205	AK3L1	NM_203464	1	0	65385819	65465760	65386678	65464447	1.94103	8.05652	9.09754	4.28e-07	7.69e-06	6.54338	-1.81977	11.8793	-3.12755	0.0322	0.249382	-3.62409	2340315	2.50618	10.0205	24.9556	1.53e-08	3.17e-06	10.5879	0.680924	9.78329	4.18605	0.00226	0.00426	-2.38485	0.587592	10.4926	5.24802	0.000662	0.00153	-0.961306	1	0	0	1	0	0	1	0	0
100316	205	AK3L1	NM_001005353	1	0	65386100	65465760	65386678	65464447	1.94103	8.05652	9.09754	4.28e-07	7.69e-06	6.54338	-1.81977	11.8793	-3.12755	0.0322	0.249382	-3.62409	2340315	2.50618	10.0205	24.9556	1.53e-08	3.17e-06	10.5879	0.680924	9.78329	4.18605	0.00226	0.00426	-2.38485	0.587592	10.4926	5.24802	0.000662	0.00153	-0.961306	1	0	0	1	0	0	1	0	0
100316	205	AK3L1	NM_013410	1	0	65386473	65465760	65386678	65464447	1.94103	8.05652	9.09754	4.28e-07	7.69e-06	6.54338	-1.81977	11.8793	-3.12755	0.0322	0.249382	-3.62409	2340315	2.50618	10.0205	24.9556	1.53e-08	3.17e-06	10.5879	0.680924	9.78329	4.18605	0.00226	0.00426	-2.38485	0.587592	10.4926	5.24802	0.000662	0.00153	-0.961306	1	0	0	1	0	0	1	0	0
-1	387851	AK3L2	NM_001002921	1	0	65386678	65464445	65386678	65464445	-1000	-1000	-1000	-1000	-1000	-1000	-1.70888	8.36659	-3.37065	0.0253	0.228295	-3.35804	-1000	-1000	-1000	-1000	-1000	-1000	-1000	-1000	-1000	-1000	-1000	-1000	-1000	-1000	-1000	-1000	-1000	-1000	-1000	0	1	0	0	1	0	0	1	0
8865	9829	DNAJC6	NM_014787	1	0	65503017	65654139	65503181	65651295	1.3375	6.27644	9.68909	2.05e-07	4.27e-06	7.31173	2.3698	5.91727	3.59135	0.0205	0.213314	-3.12519	2340350	1.73893	7.35385	9.73055	1.53e-05	8.94e-05	3.32039	1.19515	6.02158	5.1649	-1000	-1000	-1000	1.06145	6.67348	6.0252	0.000259	0.000681	0.0556318	0	1	0	1	0	0	1	0	0
1731	3953	LEPR	NM_001003680	1	0	65658905	65868680	65803836	65868675	-0.0622914	6.49672	-0.675248	0.511	0.716	-7.2578	-1000	-1000	-1000	-1000	-1000	-1000	2340433	-0.851448	5.16905	-3.03329	-1000	-1000	-1000	-0.0889478	4.09048	-0.617428	-1000	-1000	-1000	-0.350406	4.47626	-1.4658	-1000	-1000	-1000	0	1	0	0	1	0	0	1	0
1731	3953	LEPR	NM_001003679	1	0	65658905	65873697	65803836	65871439	-0.0622914	6.49672	-0.675248	0.511	0.716	-7.2578	2.43814	5.08925	4.7222	0.00778	0.160538	-2.05985	2340433	-0.851448	5.16905	-3.03329	-1000	-1000	-1000	-0.0889478	4.09048	-0.617428	-1000	-1000	-1000	-0.350406	4.47626	-1.4658	-1000	-1000	-1000	0	1	0	0	1	0	0	1	0
1731	3953	LEPR	NM_002303	1	0	65658905	65875407	65803836	65875285	-0.0622914	6.49672	-0.675248	0.511	0.716	-7.2578	0.838078	4.70615	1.02746	0.359	0.631908	-6.09786	2340433	-0.851448	5.16905	-3.03329	-1000	-1000	-1000	-0.0889478	4.09048	-0.617428	-1000	-1000	-1000	-0.350406	4.47626	-1.4658	-1000	-1000	-1000	0	1	0	0	1	0	0	1	0
10582	54741	LEPROT	NM_017526	1	0	65658906	65670836	65658995	65670189	-0.448671	8.35123	-3.53398	0.00352	0.0156	-2.77864	1.47993	10.4377	3.3552	0.0257	0.229778	-3.37466	2340433	-0.851448	5.16905	-3.03329	-1000	-1000	-1000	-0.0889478	4.09048	-0.617428	-1000	-1000	-1000	-0.350406	4.47626	-1.4658	-1000	-1000	-1000	0	1	0	0	1	0	0	1	0
1953	5142	PDE4B	NM_001037341	1	0	66030780	66612848	66151585	66610948	-1.82193	8.53954	-8.99596	4.88e-07	8.56e-06	6.40761	0.633102	7.19543	0.711223	0.514	0.750064	-6.37965	2340529	-2.05768	10.0019	-16.8796	2.82e-07	7.93e-06	7.62574	-1.77109	8.31841	-20.2232	6.43e-09	3.43e-07	11.2603	-1.57076	9.09996	-13.6145	5.12e-07	7.25e-06	6.80698	0	0	1	0	0	1	0	0	1
1953	5142	PDE4B	NM_002600	1	0	66031443	66612848	66151585	66610948	-1.82193	8.53954	-8.99596	4.88e-07	8.56e-06	6.40761	0.633102	7.19543	0.711223	0.514	0.750064	-6.37965	2340529	-2.05768	10.0019	-16.8796	2.82e-07	7.93e-06	7.62574	-1.77109	8.31841	-20.2232	6.43e-09	3.43e-07	11.2603	-1.57076	9.09996	-13.6145	5.12e-07	7.25e-06	6.80698	0	0	1	0	0	1	0	0	1
1953	5142	PDE4B	NM_001037340	1	0	66230977	66612848	66231177	66610948	-1.82193	8.53954	-8.99596	4.88e-07	8.56e-06	6.40761	0.633102	7.19543	0.711223	0.514	0.750064	-6.37965	2340529	-2.05768	10.0019	-16.8796	2.82e-07	7.93e-06	7.62574	-1.77109	8.31841	-20.2232	6.43e-09	3.43e-07	11.2603	-1.57076	9.09996	-13.6145	5.12e-07	7.25e-06	6.80698	0	0	1	0	0	1	0	0	1
1953	5142	PDE4B	NM_001037339	1	0	66570380	66612848	66570660	66610948	-1.82193	8.53954	-8.99596	4.88e-07	8.56e-06	6.40761	0.69004	2.65191	2.31657	0.0772	0.341257	-4.57648	2340529	-2.05768	10.0019	-16.8796	2.82e-07	7.93e-06	7.62574	-1.77109	8.31841	-20.2232	6.43e-09	3.43e-07	11.2603	-1.57076	9.09996	-13.6145	5.12e-07	7.25e-06	6.80698	0	0	1	0	0	1	0	0	1
13001	84251	SGIP1	NM_032291	1	0	66772412	66983354	66772629	66981365	0.0198727	4.08767	0.301365	0.768	0.884	-7.44951	0.257782	2.85518	1.13814	0.315	0.597296	-5.98417	2340695	0.021929	5.38392	0.0870108	-1000	-1000	-1000	0.0023285	5.40675	0.0132963	-1000	-1000	-1000	-0.0272753	5.46067	-0.115255	-1000	-1000	-1000	0	1	0	0	1	0	0	1	0
12117	200132	TCTEX1D1	NM_152665	1	0	66990729	67017057	66992929	67015724	-0.0321582	5.07936	-0.456717	0.655	0.815	-7.38712	-2.07782	3.42351	-4.94035	0.00658	0.155141	-1.87746	2340819	0.227444	4.81496	0.29515	-1000	-1000	-1000	0.496711	7.09757	2.50967	0.0329	0.0484	-5.14872	-0.0803877	4.19131	-0.197859	-1000	-1000	-1000	1	0	0	0	1	0	0	1	0
48350	10022	INSL5	NM_005478	1	1	67036012	67039526	67036283	67039491	-0.0705172	5.56097	-0.857562	0.406	0.631	-7.11448	0.520394	2.60467	0.449889	0.675	0.849739	-6.54966	2417008	0.00248967	5.23638	0.00996685	-1000	-1000	-1000	-0.162587	4.87495	-0.714009	-1000	-1000	-1000	-0.247654	4.87854	-0.655543	-1000	-1000	-1000	0	1	0	0	1	0	0	1	0
11702	79819	WDR78	NM_024763	1	1	67051160	67163157	67052400	67163101	-0.105836	5.17112	-1.38086	0.19	0.391	-6.54319	-0.443139	2.81139	-1.18523	0.298	0.583083	-5.93394	2417016	-0.0386577	4.78311	-0.106314	-1000	-1000	-1000	-0.0565712	4.14841	-0.291224	-1000	-1000	-1000	-0.784361	4.82069	-2.91315	-1000	-1000	-1000	0	1	0	0	1	0	0	1	0
11702	79819	WDR78	NM_207014	1	1	67075875	67163157	67075923	67163101	-0.105836	5.17112	-1.38086	0.19	0.391	-6.54319	0.834461	4.00696	1.25414	0.274	0.564934	-5.85864	2417016	-0.0386577	4.78311	-0.106314	-1000	-1000	-1000	-0.0565712	4.14841	-0.291224	-1000	-1000	-1000	-0.784361	4.82069	-2.91315	-1000	-1000	-1000	0	1	0	0	1	0	0	1	0
-1	-1	MIER1	NM_001077702	1	0	67163229	67224940	67164507	67224743	-1000	-1000	-1000	-1000	-1000	-1000	0.690341	6.0588	2.14343	0.0943	0.367718	-4.78925	2340845	-0.495152	11.0646	-4.0704	0.00403	0.00804	-2.77928	-0.582744	9.32957	-6.87253	6.66e-05	0.000193	1.39171	-0.649266	10.0492	-8.94334	1.41e-05	6.65e-05	3.2177	0	0	1	0	0	1	0	0	1
-1	-1	MIER1	NM_001077703	1	0	67163229	67224940	67164507	67224743	-1000	-1000	-1000	-1000	-1000	-1000	0.690341	6.0588	2.14343	0.0943	0.367718	-4.78925	2340845	-0.495152	11.0646	-4.0704	0.00403	0.00804	-2.77928	-0.582744	9.32957	-6.87253	6.66e-05	0.000193	1.39171	-0.649266	10.0492	-8.94334	1.41e-05	6.65e-05	3.2177	0	0	1	0	0	1	0	0	1
-1	-1	MIER1	NM_020948	1	0	67163229	67226889	67164507	67223170	-1000	-1000	-1000	-1000	-1000	-1000	1.0525	8.78384	2.88829	0.0412	0.271614	-3.89541	2340845	-0.495152	11.0646	-4.0704	0.00403	0.00804	-2.77928	-0.582744	9.32957	-6.87253	6.66e-05	0.000193	1.39171	-0.649266	10.0492	-8.94334	1.41e-05	6.65e-05	3.2177	0	0	1	0	0	1	0	0	1
10861	57708	MIER1	NM_001077700	1	0	67163229	67226889	67164507	67223170	-0.166263	8.45126	-1.37424	0.192	0.394	-6.55174	1.0525	8.78384	2.88829	0.0412	0.271614	-3.89541	2340845	-0.495152	11.0646	-4.0704	0.00403	0.00804	-2.77928	-0.582744	9.32957	-6.87253	6.66e-05	0.000193	1.39171	-0.649266	10.0492	-8.94334	1.41e-05	6.65e-05	3.2177	0	0	1	0	0	1	0	0	1
-1	-1	MIER1	NM_001077704	1	0	67168513	67224940	67168662	67224743	-1000	-1000	-1000	-1000	-1000	-1000	0.690341	6.0588	2.14343	0.0943	0.367718	-4.78925	2340845	-0.495152	11.0646	-4.0704	0.00403	0.00804	-2.77928	-0.582744	9.32957	-6.87253	6.66e-05	0.000193	1.39171	-0.649266	10.0492	-8.94334	1.41e-05	6.65e-05	3.2177	0	0	1	0	0	1	0	0	1
-1	-1	MIER1	NM_001077701	1	0	67168513	67226889	67168662	67223170	-1000	-1000	-1000	-1000	-1000	-1000	1.0525	8.78384	2.88829	0.0412	0.271614	-3.89541	2340845	-0.495152	11.0646	-4.0704	0.00403	0.00804	-2.77928	-0.582744	9.32957	-6.87253	6.66e-05	0.000193	1.39171	-0.649266	10.0492	-8.94334	1.41e-05	6.65e-05	3.2177	0	0	1	0	0	1	0	0	1
22870	23169	SLC35D1	NM_015139	1	1	67242439	67292315	67242610	67292283	-0.219772	9.14438	-1.29228	0.218	0.429	-6.65504	0.685445	6.61751	1.19286	0.295	0.581019	-5.9257	2417095	0.197173	11.3013	1.25275	0.248	0.3	-6.92359	-0.76264	10.8271	-11.0816	1.3e-06	8.55e-06	5.64587	-0.538555	10.1384	-4.81136	0.00116	0.0025	-1.56978	0	0	1	0	0	1	0	1	0
52843	400757	C1orf141	NM_001013674	1	1	67330446	67366807	67331275	67365510	-1000	-1000	-1000	-1000	-1000	-1000	-1000	-1000	-1000	-1000	-1000	-1000	-1000	-1000	-1000	-1000	-1000	-1000	-1000	-1000	-1000	-1000	-1000	-1000	-1000	-1000	-1000	-1000	-1000	-1000	-1000	0	1	0	0	1	0	0	1	0
16930	149233	IL23R	NM_144701	1	0	67404756	67498235	67406391	67497398	0.0264261	4.17454	0.362644	0.723	0.857	-7.42789	0.590192	2.67634	0.627722	0.562	0.781308	-6.44098	2340930	-0.350344	4.41676	-1.49639	-1000	-1000	-1000	0.0229658	4.21776	0.0779464	-1000	-1000	-1000	-0.203891	4.46055	-0.931165	-1000	-1000	-1000	0	1	0	0	1	0	0	1	0
1197	3595	IL12RB2	NM_001559	1	0	67545634	67635169	67558639	67634359	0.0321459	4.53118	0.395536	0.699	0.842	-7.41468	-2.02663	5.13121	-4.5246	0.0091	0.166031	-2.2312	2340961	-0.440531	4.15753	-1.24745	-1000	-1000	-1000	0.287013	4.38262	1.69258	-1000	-1000	-1000	-0.113986	4.3254	-0.324778	-1000	-1000	-1000	0	1	0	0	1	0	0	1	0
32275	26135	SERBP1	NM_001018067	1	1	67646082	67668710	67651477	67668570	1.9173	9.00804	21.3924	9.89e-12	4.62e-09	17.3891	-1.21064	9.7281	-4.40502	0.01	0.170665	-2.33782	2417174	1.23531	12.5727	12.7027	2.26e-06	2.51e-05	5.40069	1.70301	12.0558	22.4818	2.48e-09	2.21e-07	12.2344	0.679377	12.5028	9.37288	9.85e-06	5.18e-05	3.61099	1	0	0	1	0	0	1	0	0
32275	26135	SERBP1	NM_001018068	1	1	67646082	67668710	67651477	67668570	1.9173	9.00804	21.3924	9.89e-12	4.62e-09	17.3891	-1.21064	9.7281	-4.40502	0.01	0.170665	-2.33782	2417174	1.23531	12.5727	12.7027	2.26e-06	2.51e-05	5.40069	1.70301	12.0558	22.4818	2.48e-09	2.21e-07	12.2344	0.679377	12.5028	9.37288	9.85e-06	5.18e-05	3.61099	1	0	0	1	0	0	1	0	0
32275	26135	SERBP1	NM_001018069	1	1	67646082	67668710	67651477	67668570	1.9173	9.00804	21.3924	9.89e-12	4.62e-09	17.3891	-1.21064	9.7281	-4.40502	0.01	0.170665	-2.33782	2417174	1.23531	12.5727	12.7027	2.26e-06	2.51e-05	5.40069	1.70301	12.0558	22.4818	2.48e-09	2.21e-07	12.2344	0.679377	12.5028	9.37288	9.85e-06	5.18e-05	3.61099	1	0	0	1	0	0	1	0	0
32275	26135	SERBP1	NM_015640	1	1	67646082	67668710	67651477	67668570	1.9173	9.00804	21.3924	9.89e-12	4.62e-09	17.3891	-1.21064	9.7281	-4.40502	0.01	0.170665	-2.33782	2417174	1.23531	12.5727	12.7027	2.26e-06	2.51e-05	5.40069	1.70301	12.0558	22.4818	2.48e-09	2.21e-07	12.2344	0.679377	12.5028	9.37288	9.85e-06	5.18e-05	3.61099	1	0	0	1	0	0	1	0	0
1449	1647	GADD45A	NM_001924	1	0	67923470	67926606	67923765	67926044	-0.503348	9.22587	-3.8644	0.00186	0.009	-2.13358	1.77826	12.1669	4.32631	0.0107	0.174586	-2.40923	2341083	-0.522724	9.47132	-4.56287	0.00213	0.00463	-2.089	-0.0588095	10.3322	-0.437402	0.672	0.712	-7.69685	-0.459217	10.3536	-4.7865	0.0012	0.00257	-1.60523	0	1	0	0	0	1	0	0	1
32427	55970	GNG12	NM_018841	1	1	67939736	68071729	67943721	67945956	0.086462	5.30457	0.882192	0.393	0.618	-7.09275	2.46745	7.68033	5.90504	0.00333	0.134504	-1.14927	2417272	-0.143367	3.23951	-0.268916	-1000	-1000	-1000	-0.947735	2.96905	-2.07376	-1000	-1000	-1000	-0.378155	3.07311	-0.565133	-1000	-1000	-1000	0	1	0	0	1	0	0	1	0
48296	9077	DIRAS3	NM_004675	1	1	68284234	68289047	68284878	68285567	0.105151	4.32648	1.85478	0.0858	0.221	-5.8584	1.61275	2.46035	3.01589	0.0361	0.259054	-3.74957	2417362	-0.74611	4.81312	-1.91263	-1000	-1000	-1000	0.044742	4.42291	0.118488	-1000	-1000	-1000	0.18783	5.01964	0.689838	-1000	-1000	-1000	0	1	0	0	1	0	0	1	0
11779	79971	GPR177	NM_001002292	1	1	68336739	68470840	68336902	68470569	0.0279512	5.95272	0.49978	0.625	0.796	-7.36542	-1000	-1000	-1000	-1000	-1000	-1000	2417390	0.182025	5.52975	0.807619	-1000	-1000	-1000	-0.0718825	5.32526	-0.405374	-1000	-1000	-1000	0.117472	5.59379	0.620572	-1000	-1000	-1000	0	1	0	0	1	0	0	1	0
11779	79971	GPR177	NM_024911	1	1	68363629	68470840	68364496	68470569	0.0279512	5.95272	0.49978	0.625	0.796	-7.36542	2.24975	9.7569	3.6001	0.0203	0.213093	-3.11614	2417390	0.182025	5.52975	0.807619	-1000	-1000	-1000	-0.0718825	5.32526	-0.405374	-1000	-1000	-1000	0.117472	5.59379	0.620572	-1000	-1000	-1000	0	1	0	0	1	0	0	1	0
20108	6121	RPE65	NM_000329	1	1	68667094	68688229	68668046	68688175	-0.0152937	3.37563	-0.250823	0.806	0.904	-7.46438	-0.140635	2.24195	-0.461693	0.667	0.845017	-6.54343	2417500	-0.180563	5.605	-0.682544	-1000	-1000	-1000	0.0950407	5.12659	0.442722	-1000	-1000	-1000	0.152401	5.93582	0.489425	-1000	-1000	-1000	0	1	0	0	1	0	0	1	0
9834	55635	DEPDC1	NM_017779	1	1	68713526	68735294	68715202	68735269	1.67464	7.46582	13.0963	5.24e-09	2.65e-07	11.1026	1.32045	5.49112	2.03986	0.106	0.384133	-4.91718	2417528	1.78763	8.90702	8.96052	2.73e-05	0.000133	2.68591	1.89829	6.7434	8.09594	1.8e-05	6.48e-05	2.8047	1.34231	8.21163	6.09008	0.00024	0.000639	0.136805	1	0	0	1	0	0	1	0	0
10817	57554	LRRC7	NM_020794	1	0	69998445	70361756	69998475	70360157	0.0563572	6.20749	0.96806	0.35	0.578	-7.01277	-1.21761	3.25475	-2.4966	0.063	0.318798	-4.35778	2341387	0.550354	5.47911	1.0925	-1000	-1000	-1000	-0.445455	5.42124	-1.59163	-1000	-1000	-1000	-0.400048	5.64635	-1.35381	-1000	-1000	-1000	0	1	0	0	1	0	0	1	0
9825	55631	LRRC40	NM_017768	1	1	70383084	70443862	70384070	70443810	0.953519	8.94825	7.82828	2.37e-06	3.11e-05	4.76038	0.065528	9.59287	0.215234	0.839	0.93458	-6.64172	2417737	0.754619	10.6821	7.14112	0.000129	0.000446	0.979943	0.368874	9.58042	3.8195	0.00396	0.00706	-2.9743	0.703615	9.96109	6.37804	0.000173	0.000484	0.490428	1	0	0	1	0	0	1	0	0
36164	9295	SFRS11	NM_004768	1	0	70443952	70490270	70459907	70489075	0.424369	8.04477	3.21195	0.0066	0.0267	-3.4056	-0.0603383	11.5565	-0.258757	0.808	0.919339	-6.62936	2341565	0.0621653	11.1951	0.533035	0.609	0.657	-7.57162	0.331322	11.8665	3.68909	0.00485	0.00848	-3.18739	0.180506	10.5726	2.98788	0.0165	0.0261	-4.37283	1	0	0	1	0	0	0	1	0
41804	81573	ANKRD13C	NM_030816	1	1	70500133	70592987	70500987	70592678	0.452654	4.85063	2.64231	0.0199	0.0683	-4.49048	-1000	-1000	-1000	-1000	-1000	-1000	2417791	-0.205298	9.94506	-1.26002	0.245	0.297	-6.91505	-0.589407	8.9267	-6.81409	7.12e-05	0.000204	1.31982	-0.410456	9.26942	-4.78115	0.00121	0.00258	-1.61288	0	0	1	0	0	1	0	1	0
-1	11147	HHLA3	NM_001036646	1	0	70593080	70606290	70593222	70604788	-0.656966	7.78982	-6.89137	9.48e-06	9.81e-05	3.31495	-0.556393	4.60639	-2.06918	0.103	0.380658	-4.88094	2341645	-1.1533	7.94706	-5.79019	0.000505	0.00135	-0.518454	-1.12257	7.89159	-7.93975	2.11e-05	7.37e-05	2.6336	-1.61184	8.9391	-9.55222	8.51e-06	4.66e-05	3.77064	0	0	1	0	0	1	0	0	1
-1	11147	HHLA3	NM_007071	1	0	70593080	70606290	70593222	70604788	-0.656966	7.78982	-6.89137	9.48e-06	9.81e-05	3.31495	-0.770024	3.59776	-2.08595	0.101	0.37735	-4.86022	-1000	-1000	-1000	-1000	-1000	-1000	-1000	-1000	-1000	-1000	-1000	-1000	-1000	-1000	-1000	-1000	-1000	-1000	-1000	0	1	0	0	1	0	0	1	0
-1	11147	HHLA3	NM_001036645	1	0	70593080	70606290	70593222	70604801	-0.656966	7.78982	-6.89137	9.48e-06	9.81e-05	3.31495	-0.556393	4.60639	-2.06918	0.103	0.380658	-4.88094	2341645	-1.1533	7.94706	-5.79019	0.000505	0.00135	-0.518454	-1.12257	7.89159	-7.93975	2.11e-05	7.37e-05	2.6336	-1.61184	8.9391	-9.55222	8.51e-06	4.66e-05	3.77064	0	0	1	0	0	1	0	0	1
-1	11147	HHLA3	NM_001031693	1	0	70593080	70606290	70593222	70605998	-0.656966	7.78982	-6.89137	9.48e-06	9.81e-05	3.31495	-0.556393	4.60639	-2.06918	0.103	0.380658	-4.88094	2341645	-1.1533	7.94706	-5.79019	0.000505	0.00135	-0.518454	-1.12257	7.89159	-7.93975	2.11e-05	7.37e-05	2.6336	-1.61184	8.9391	-9.55222	8.51e-06	4.66e-05	3.77064	0	0	1	0	0	1	0	0	1
1432	1491	CTH	NM_001902	1	0	70649542	70677839	70649686	70677397	0.478407	5.02301	2.06508	0.0589	0.165	-5.51575	-0.293111	10.0253	-0.957753	0.389	0.655622	-6.16589	2341663	0.290686	5.85428	0.731739	-1000	-1000	-1000	0.399002	5.00401	1.27785	-1000	-1000	-1000	0.879357	5.61137	2.68973	-1000	-1000	-1000	0	1	0	0	1	0	0	1	0
1432	1491	CTH	NM_153742	1	0	70649542	70677839	70649686	70677397	0.478407	5.02301	2.06508	0.0589	0.165	-5.51575	-0.293111	10.0253	-0.957753	0.389	0.655622	-6.16589	2341663	0.290686	5.85428	0.731739	-1000	-1000	-1000	0.399002	5.00401	1.27785	-1000	-1000	-1000	0.879357	5.61137	2.68973	-1000	-1000	-1000	0	1	0	0	1	0	0	1	0
105460	5733	PTGER3	NM_198716	1	1	71090623	71286078	71091109	71285847	0.117983	3.91258	1.99568	0.0668	0.182	-5.63106	-1000	-1000	-1000	-1000	-1000	-1000	2417945	0.122225	4.24744	0.138902	-1000	-1000	-1000	-0.441729	2.84703	-0.540746	-1000	-1000	-1000	-0.575186	3.78735	-0.697899	-1000	-1000	-1000	0	1	0	0	1	0	0	1	0
105460	5733	PTGER3	NM_198717	1	1	71090623	71286078	71091109	71285847	0.117983	3.91258	1.99568	0.0668	0.182	-5.63106	-1000	-1000	-1000	-1000	-1000	-1000	2417945	0.122225	4.24744	0.138902	-1000	-1000	-1000	-0.441729	2.84703	-0.540746	-1000	-1000	-1000	-0.575186	3.78735	-0.697899	-1000	-1000	-1000	0	1	0	0	1	0	0	1	0
105460	5733	PTGER3	NM_000957	1	1	71090623	71286078	71100639	71285847	0.117983	3.91258	1.99568	0.0668	0.182	-5.63106	0.0530133	2.03238	0.224661	0.833	0.930809	-6.63923	2417945	0.122225	4.24744	0.138902	-1000	-1000	-1000	-0.441729	2.84703	-0.540746	-1000	-1000	-1000	-0.575186	3.78735	-0.697899	-1000	-1000	-1000	0	1	0	0	1	0	0	1	0
105460	5733	PTGER3	NM_198712	1	1	71090623	71286078	71100639	71285847	0.117983	3.91258	1.99568	0.0668	0.182	-5.63106	0.0530133	2.03238	0.224661	0.833	0.930809	-6.63923	2417945	0.122225	4.24744	0.138902	-1000	-1000	-1000	-0.441729	2.84703	-0.540746	-1000	-1000	-1000	-0.575186	3.78735	-0.697899	-1000	-1000	-1000	0	1	0	0	1	0	0	1	0
105460	5733	PTGER3	NM_198713	1	1	71090623	71286078	71100639	71285847	0.117983	3.91258	1.99568	0.0668	0.182	-5.63106	0.0530133	2.03238	0.224661	0.833	0.930809	-6.63923	2417945	0.122225	4.24744	0.138902	-1000	-1000	-1000	-0.441729	2.84703	-0.540746	-1000	-1000	-1000	-0.575186	3.78735	-0.697899	-1000	-1000	-1000	0	1	0	0	1	0	0	1	0
105460	5733	PTGER3	NM_198714	1	1	71090623	71286078	71192056	71285847	0.117983	3.91258	1.99568	0.0668	0.182	-5.63106	0.0530133	2.03238	0.224661	0.833	0.930809	-6.63923	2417945	0.122225	4.24744	0.138902	-1000	-1000	-1000	-0.441729	2.84703	-0.540746	-1000	-1000	-1000	-0.575186	3.78735	-0.697899	-1000	-1000	-1000	0	1	0	0	1	0	0	1	0
105460	5733	PTGER3	NM_198718	1	1	71190702	71286078	71191177	71285847	0.117983	3.91258	1.99568	0.0668	0.182	-5.63106	-1000	-1000	-1000	-1000	-1000	-1000	2417945	0.122225	4.24744	0.138902	-1000	-1000	-1000	-0.441729	2.84703	-0.540746	-1000	-1000	-1000	-0.575186	3.78735	-0.697899	-1000	-1000	-1000	0	1	0	0	1	0	0	1	0
105460	5733	PTGER3	NM_198719	1	1	71209051	71286078	71210000	71285847	0.117983	3.91258	1.99568	0.0668	0.182	-5.63106	-1000	-1000	-1000	-1000	-1000	-1000	2417945	0.122225	4.24744	0.138902	-1000	-1000	-1000	-0.441729	2.84703	-0.540746	-1000	-1000	-1000	-0.575186	3.78735	-0.697899	-1000	-1000	-1000	0	1	0	0	1	0	0	1	0
105460	5733	PTGER3	NM_198715	1	1	71244125	71286078	71250485	71285847	0.117983	3.91258	1.99568	0.0668	0.182	-5.63106	0.753658	2.70511	1.72777	0.154	0.446831	-5.30174	2417945	0.122225	4.24744	0.138902	-1000	-1000	-1000	-0.441729	2.84703	-0.540746	-1000	-1000	-1000	-0.575186	3.78735	-0.697899	-1000	-1000	-1000	0	1	0	0	1	0	0	1	0
3984	9406	ZRANB2	NM_203350	1	1	71301562	71319332	71303344	71319265	0.413421	9.91812	6.25232	2.61e-05	0.000231	2.26135	-0.290228	8.90269	-1.14386	0.313	0.595533	-5.97813	2418000	0.23614	11.9285	1.99527	0.0832	0.115	-5.9228	0.139706	12.2098	1.45342	0.179	0.222	-6.74943	0.135714	11.1108	2.24792	0.0532	0.0755	-5.55863	0	1	0	0	1	0	0	1	0
3984	9406	ZRANB2	NM_005455	1	1	71301562	71319332	71303989	71319265	0.413421	9.91812	6.25232	2.61e-05	0.000231	2.26135	-0.290228	8.90269	-1.14386	0.313	0.595533	-5.97813	2418000	0.23614	11.9285	1.99527	0.0832	0.115	-5.9228	0.139706	12.2098	1.45342	0.179	0.222	-6.74943	0.135714	11.1108	2.24792	0.0532	0.0755	-5.55863	0	1	0	0	1	0	0	1	0
41447	257194	NEGR1	NM_173808	1	1	71641213	72520864	71645716	72520764	0.0428839	3.29448	0.847242	0.412	0.636	-7.12342	0.723428	1.31127	1.29718	0.26	0.553487	-5.81065	2418078	-0.413685	4.93857	-1.27739	-1000	-1000	-1000	-0.104456	4.46541	-0.388351	-1000	-1000	-1000	0.0398115	4.78217	0.103929	-1000	-1000	-1000	0	1	0	0	1	0	0	1	0
23668	127255	LRRC44	NM_145258	1	1	74418183	74436418	74419017	74421955	-1000	-1000	-1000	-1000	-1000	-1000	-1000	-1000	-1000	-1000	-1000	-1000	-1000	-1000	-1000	-1000	-1000	-1000	-1000	-1000	-1000	-1000	-1000	-1000	-1000	-1000	-1000	-1000	-1000	-1000	-1000	0	1	0	0	1	0	0	1	0
2847	8790	FPGT	NM_003838	1	0	74436513	74445707	74436550	74444103	0.466293	6.17067	3.32071	0.00534	0.0223	-3.19441	1.37414	5.56333	3.06641	0.0343	0.254002	-3.69255	2342176	0.140209	9.27405	0.952301	0.37	0.428	-7.24532	-0.258392	7.13324	-1.24216	0.245	0.292	-7.01227	-0.140439	8.61376	-1.00253	0.344	0.4	-7.23716	0	1	0	0	1	0	0	1	0
41084	51086	TNNI3K	NM_015978	1	0	74473672	74782695	74473723	74782253	0.166915	5.24594	2.04403	0.0612	0.17	-5.55095	-0.339152	3.27858	-1.00604	0.368	0.638722	-6.11908	2342220	-0.823048	5.31035	-2.98681	-1000	-1000	-1000	-0.52661	4.32024	-2.78592	-1000	-1000	-1000	0.0714348	4.66849	0.328925	-1000	-1000	-1000	0	1	0	0	1	0	0	1	0
27877	127254	C1orf173	NM_001002912	1	1	74806383	74912009	74809388	74911790	-0.125035	3.95955	-2.18887	0.0469	0.138	-5.3052	-0.49535	2.42342	-1.25009	0.275	0.565917	-5.86313	2418408	0.345437	5.81369	0.805495	-1000	-1000	-1000	-0.0320078	5.60826	-0.18584	-1000	-1000	-1000	1.30404	4.81986	3.4919	-1000	-1000	-1000	0	1	0	0	1	0	0	1	0
68210	1429	CRYZ	NM_001889	1	1	74943771	74971314	74944567	74963092	0.613377	9.06957	3.44677	0.00418	0.0181	-2.94883	-0.669656	2.77692	-1.91696	0.123	0.406637	-5.06909	2342391	0.9529	11.047	6.81806	0.000175	0.000568	0.641589	0.513802	9.5033	4.34614	0.00178	0.00344	-2.13236	0.565117	9.69879	6.86323	0.000102	0.000313	1.06248	1	0	0	1	0	0	1	0	0
44531	127253	TYW3	NM_138467	1	0	74971427	75003895	74971516	75002384	0.918127	9.39387	6.03074	3.75e-05	0.000316	1.88293	-1.07438	5.19418	-2.22544	0.0858	0.355016	-4.68824	2342391	0.9529	11.047	6.81806	0.000175	0.000568	0.641589	0.513802	9.5033	4.34614	0.00178	0.00344	-2.13236	0.556191	10.777	6.42334	0.000165	0.000464	0.545092	1	0	0	1	0	0	1	0	0
62661	431707	LHX8	NM_001001933	1	0	75366706	75399803	75368987	75399167	0.104799	3.55598	1.80102	0.0943	0.236	-5.94259	-1000	-1000	-1000	-1000	-1000	-1000	2342475	0.313489	4.80939	0.920271	-1000	-1000	-1000	0.410747	4.41585	2.16551	-1000	-1000	-1000	-0.165334	4.4042	-0.371364	-1000	-1000	-1000	0	1	0	0	1	0	0	1	0
72094	204962	SLC44A5	NM_152697	1	1	75444870	75849356	75444879	75779719	-1.7358	4.97773	-11.8341	1.83e-08	6.62e-07	9.81119	0.760785	3.58929	2.80755	0.0449	0.280913	-3.98896	2418570	-2.1477	9.01464	-21.4125	4.82e-08	3.99e-06	9.45021	-1.82958	8.63287	-13.1912	2.86e-07	3.04e-06	7.2673	-1.45273	7.93288	-9.11109	1.23e-05	6.03e-05	3.37317	0	0	1	0	0	1	0	0	1
3	34	ACADM	NM_000016	1	0	75962869	76001770	75963060	76001035	0.212377	10.933	1.68182	0.116	0.276	-6.12374	0.012776	8.82875	0.0331503	0.975	0.990788	-6.66903	2342576	0.49615	12.1655	4.62169	0.00198	0.00434	-2.00885	0.693264	11.3245	6.84286	6.89e-05	0.000198	1.35527	0.209584	11.8868	2.13516	0.0636	0.0888	-5.73407	1	0	0	0	1	0	1	0	0
3371	5876	RABGGTB	NM_004582	1	0	76024473	76033351	76024544	76032922	1.06016	9.67737	12.6099	8.38e-09	3.7e-07	10.6189	0.180386	11.4903	0.55108	0.609	0.812012	-6.49164	2342624	0.844955	11.8162	8.01635	5.89e-05	0.00024	1.84026	1.07805	11.1415	11.1138	1.26e-06	8.41e-06	5.67263	0.434897	11.6592	6.20475	0.000211	0.00057	0.278915	1	0	0	1	0	0	1	0	0
1830	4438	MSH4	NM_002440	1	0	76035217	76151510	76035258	76151159	0.000304241	4.50441	0.00370727	0.997	0.999	-7.498	-0.372784	3.44139	-0.949389	0.393	0.658477	-6.17385	2342665	-0.0198773	4.37707	-0.0376564	-1000	-1000	-1000	0.227198	4.46574	1.12232	-1000	-1000	-1000	1.32867	4.28535	5.33719	-1000	-1000	-1000	0	1	0	0	1	0	0	1	0
12031	127247	ASB17	NM_080868	1	1	76157147	76170703	76157224	76170563	0.0715575	4.18063	0.774251	0.452	0.669	-7.18384	0.0965963	1.73689	0.406551	0.704	0.867424	-6.57125	2418700	0.0225617	4.68226	0.0643912	-1000	-1000	-1000	-0.30691	3.47596	-1.11891	-1000	-1000	-1000	-0.304463	4.72379	-1.04698	-1000	-1000	-1000	0	1	0	0	1	0	0	1	0
7938	256435	ST6GALNAC3	NM_152996	1	0	76312991	76869219	76313139	76867078	-0.100336	5.02711	-1.06566	0.305	0.532	-6.9141	-0.213163	7.31743	-0.821537	0.455	0.707015	-6.28962	2342738	0.33501	5.21857	0.942603	-1000	-1000	-1000	0.127046	4.75487	0.297143	-1000	-1000	-1000	0.469675	4.74637	1.7455	-1000	-1000	-1000	0	1	0	0	1	0	0	1	0
8079	81849	ST6GALNAC5	NM_030965	1	0	77105773	77302322	77105948	77301478	0.106831	6.25191	1.49541	0.158	0.345	-6.39041	-1.51167	5.59161	-4.14994	0.0124	0.181273	-2.57286	2342904	0.18309	6.49099	0.490351	-1000	-1000	-1000	0.0155035	5.61409	0.0906022	-1000	-1000	-1000	-0.224383	6.85344	-0.955769	-1000	-1000	-1000	0	1	0	0	1	0	0	1	0
4002	10026	PIGK	NM_005482	1	1	77327256	77457719	77330646	77457674	0.430754	7.17005	5.43254	0.000104	0.000753	0.828115	1.23783	9.01685	2.62469	0.0547	0.303142	-4.20433	2418929	0.573805	9.15199	3.45424	0.00942	0.0169	-3.68787	0.0308922	8.13001	0.198862	0.847	0.869	-7.77983	-0.120182	8.87678	-0.651545	0.532	0.585	-7.53605	0	1	0	0	1	0	1	0	0
76103	26289	AK5	NM_174858	1	0	77520329	77798239	77520586	77796942	0.0971897	6.37916	1.07678	0.301	0.527	-6.90235	-2.74497	5.66842	-3.89496	0.0155	0.195335	-2.81847	2343025	0.324349	5.60361	1.1505	-1000	-1000	-1000	0.34053	5.03666	1.54375	-1000	-1000	-1000	0.544146	5.46406	1.43975	-1000	-1000	-1000	0	1	0	0	1	0	0	1	0
76103	26289	AK5	NM_012093	1	0	77520874	77798239	77525231	77796942	0.0971897	6.37916	1.07678	0.301	0.527	-6.90235	-2.74497	5.66842	-3.89496	0.0155	0.195335	-2.81847	2343025	0.324349	5.60361	1.1505	-1000	-1000	-1000	0.34053	5.03666	1.54375	-1000	-1000	-1000	0.544146	5.46406	1.43975	-1000	-1000	-1000	0	1	0	0	1	0	0	1	0
9182	26009	ZZZ3	NM_015534	1	1	77802778	77920930	77803912	77871626	0.688675	8.68813	7.57902	3.39e-06	4.15e-05	4.38703	0.218535	7.38792	0.6662	0.54	0.767729	-6.41348	2419046	0.608345	10.467	6.46549	0.000249	0.000755	0.25848	0.364915	8.93135	5.07334	0.000632	0.00136	-1.02802	0.367696	9.39736	3.33367	0.00963	0.0162	-3.8165	1	0	0	1	0	0	1	0	0
8996	23032	USP33	NM_201624	1	1	77934263	77998124	77935589	77979969	-0.621717	8.92123	-7.43328	4.19e-06	4.98e-05	4.16503	0.483734	8.38664	1.75807	0.149	0.440317	-5.26467	2419113	-0.654433	10.8335	-5.6369	0.000597	0.00156	-0.703127	-0.933738	9.59575	-7.31867	4.06e-05	0.000127	1.92689	-0.535422	10.0615	-7.70254	4.38e-05	0.000157	1.98641	0	0	1	0	0	1	0	0	1
8996	23032	USP33	NM_015017	1	1	77934263	77998124	77935589	77983734	-0.621717	8.92123	-7.43328	4.19e-06	4.98e-05	4.16503	0.483734	8.38664	1.75807	0.149	0.440317	-5.26467	2419113	-0.654433	10.8335	-5.6369	0.000597	0.00156	-0.703127	-0.933738	9.59575	-7.31867	4.06e-05	0.000127	1.92689	-0.535422	10.0615	-7.70254	4.38e-05	0.000157	1.98641	0	0	1	0	0	1	0	0	1
8996	23032	USP33	NM_201626	1	1	77949927	77998124	77950007	77983734	-0.621717	8.92123	-7.43328	4.19e-06	4.98e-05	4.16503	0.0264137	10.6246	0.113381	0.915	0.968685	-6.66191	2419113	-0.654433	10.8335	-5.6369	0.000597	0.00156	-0.703127	-0.933738	9.59575	-7.31867	4.06e-05	0.000127	1.92689	-0.535422	10.0615	-7.70254	4.38e-05	0.000157	1.98641	0	0	1	0	0	1	0	0	1
18369	374986	FAM73A	NM_198549	1	0	78017896	78116664	78017928	78113336	-0.436528	5.25695	-2.88133	0.0126	0.0464	-4.041	0.997562	6.45052	4.21323	0.0118	0.17907	-2.51356	-1000	-1000	-1000	-1000	-1000	-1000	-1000	-1000	-1000	-1000	-1000	-1000	-1000	-1000	-1000	-1000	-1000	-1000	-1000	0	1	0	0	1	0	0	1	0
-1	374987	C1orf118	NM_001039463	1	1	78119620	78127811	78126848	78127787	-1000	-1000	-1000	-1000	-1000	-1000	-1000	-1000	-1000	-1000	-1000	-1000	-1000	-1000	-1000	-1000	-1000	-1000	-1000	-1000	-1000	-1000	-1000	-1000	-1000	-1000	-1000	-1000	-1000	-1000	-1000	0	1	0	0	1	0	0	1	0
44892	91624	NEXN	NM_144573	1	0	78156395	78181503	78156423	78181101	-0.141608	4.09832	-2.57434	0.0227	0.0762	-4.61618	-0.625201	8.58742	-0.994404	0.373	0.643229	-6.13049	2343231	0.171914	3.79913	0.303549	-1000	-1000	-1000	0.312822	3.51518	1.15624	-1000	-1000	-1000	-0.3952	3.996	-0.720873	-1000	-1000	-1000	0	1	0	0	1	0	0	1	0
48253	8880	FUBP1	NM_003902	1	1	78186180	78217364	78187038	78217275	0.626538	8.44049	4.82088	0.000309	0.00192	-0.297858	-0.389862	10.5052	-1.6264	0.175	0.468828	-5.42496	2419235	0.383517	12.1893	3.75759	0.00616	0.0116	-3.23481	0.0652225	11.7496	0.839008	0.423	0.473	-7.42622	0.0650272	11.2791	0.795575	0.448	0.504	-7.42653	0	1	0	0	1	0	1	0	0
100610	11080	DNAJB4	NM_007034	1	0	78243223	78255580	78243382	78254518	-0.426763	4.89952	-3.36622	0.00488	0.0207	-3.10583	0.888644	8.43167	1.50716	0.202	0.497861	-5.56775	2343289	-0.941105	8.38196	-5.96613	0.000417	0.00115	-0.310364	-0.674725	6.4245	-3.81324	-1000	-1000	-1000	-0.918023	8.27543	-9.35188	1e-05	5.24e-05	3.59213	0	1	0	0	0	1	0	0	1
22994	54810	GIPC2	NM_017655	1	0	78284176	78375698	78284366	78374014	0.0526197	4.04946	0.922227	0.373	0.599	-7.05628	0.988648	4.84897	1.91656	0.123	0.406688	-5.06959	2343334	-0.333038	4.30903	-1.04109	-1000	-1000	-1000	-0.151465	4.19276	-0.811254	-1000	-1000	-1000	-0.0138978	4.64358	-0.0651771	-1000	-1000	-1000	0	1	0	0	1	0	0	1	0
741	5737	PTGFR	NM_001039585	1	0	78729315	78778972	78731016	78774702	0.0999687	4.24304	1.45244	0.169	0.362	-6.44876	-0.578794	2.44554	-1.70274	0.159	0.451574	-5.3323	2343418	0.518317	4.57869	1.62385	-1000	-1000	-1000	0.159216	5.92256	0.695973	-1000	-1000	-1000	-0.0931063	4.95597	-0.232002	-1000	-1000	-1000	0	1	0	0	1	0	0	1	0
741	5737	PTGFR	NM_000959	1	0	78729315	78778972	78731016	78774959	0.0999687	4.24304	1.45244	0.169	0.362	-6.44876	-0.578794	2.44554	-1.70274	0.159	0.451574	-5.3323	2343418	0.518317	4.57869	1.62385	-1000	-1000	-1000	0.159216	5.92256	0.695973	-1000	-1000	-1000	-0.0931063	4.95597	-0.232002	-1000	-1000	-1000	0	1	0	0	1	0	0	1	0
48468	10964	IFI44L	NM_006820	1	0	78858736	78880656	78866305	78880081	-3.84896	9.0792	-7.60871	3.25e-06	4.01e-05	4.43192	0.462622	3.03579	0.581683	0.59	0.798206	-6.47208	2343473	-4.05983	10.7988	-18.9486	1.2e-07	5.42e-06	8.51935	-2.63526	11.1235	-10.9317	1.46e-06	9.33e-06	5.52	-1.76632	11.3116	-6.23449	0.000204	0.000554	0.315498	0	0	1	0	0	1	0	0	1
4683	10561	IFI44	NM_006417	1	0	78888103	78902344	78888468	78902083	-3.46574	7.24478	-9.64462	2.16e-07	4.46e-06	7.25526	-0.0155977	2.30737	-0.0654109	0.951	0.983049	-6.6671	2343511	-4.2077	8.99488	-20.7111	6.17e-08	4.31e-06	9.19833	-2.84014	9.79828	-11.4306	9.93e-07	7.17e-06	5.93285	-2.30608	10.2529	-5.68264	0.000387	0.000956	-0.382351	0	0	1	0	0	1	0	0	1
22712	23266	LPHN2	NM_012302	1	0	82038669	82230693	82075257	82229416	0.128144	3.80399	2.11076	0.0542	0.154	-5.43876	0.194556	9.20722	0.775975	0.478	0.725765	-6.32798	2343823	-0.305753	4.5363	-1.33691	-1000	-1000	-1000	0.0148402	4.3956	0.0944914	-1000	-1000	-1000	0.005083	4.66909	0.0244282	-1000	-1000	-1000	0	1	0	0	1	0	0	1	0
41578	79739	TTLL7	NM_024686	1	1	84107646	84237420	84108232	84190481	-0.0713553	5.10646	-1.07226	0.303	0.529	-6.90714	0.184734	6.1885	0.69096	0.525	0.757849	-6.3951	2420229	-0.153545	4.57465	-0.466532	-1000	-1000	-1000	0.00959425	4.88915	0.0454662	-1000	-1000	-1000	-0.0934042	4.6031	-0.297579	-1000	-1000	-1000	0	1	0	0	1	0	0	1	0
100955	5567	PRKACB	NM_207578	1	0	84316332	84443564	84316596	84442760	-0.447133	5.83932	-2.90878	0.0119	0.0443	-3.98877	0.13598	6.12028	0.178153	0.867	0.947396	-6.6505	2344393	-0.290067	9.86031	-1.79634	0.112	0.15	-6.2113	-0.550034	6.82634	-2.26551	0.0492	0.0697	-5.54612	-0.77354	8.89562	-3.62634	0.00619	0.0109	-3.35175	0	1	0	0	0	1	0	1	0
100955	5567	PRKACB	NM_002731	1	0	84316332	84476766	84316596	84473575	-0.447133	5.83932	-2.90878	0.0119	0.0443	-3.98877	0.842905	8.05091	1.19548	0.294	0.580196	-5.92287	2344393	-0.290067	9.86031	-1.79634	0.112	0.15	-6.2113	-0.550034	6.82634	-2.26551	0.0492	0.0697	-5.54612	-0.77354	8.89562	-3.62634	0.00619	0.0109	-3.35175	0	1	0	0	0	1	0	1	0
100955	5567	PRKACB	NM_182948	1	0	84382539	84476766	84382632	84473575	-0.447133	5.83932	-2.90878	0.0119	0.0443	-3.98877	0.842905	8.05091	1.19548	0.294	0.580196	-5.92287	2344393	-0.290067	9.86031	-1.79634	0.112	0.15	-6.2113	-0.550034	6.82634	-2.26551	0.0492	0.0697	-5.54612	-0.77354	8.89562	-3.62634	0.00619	0.0109	-3.35175	0	1	0	0	0	1	0	1	0
52725	148418	SAMD13	NM_001010971	1	0	84536636	84589066	84536828	84588044	0.185371	7.28524	1.08736	0.296	0.522	-6.89107	0.634	4.15817	1.40114	0.229	0.526671	-5.69201	-1000	-1000	-1000	-1000	-1000	-1000	-1000	-1000	-1000	-1000	-1000	-1000	-1000	-1000	-1000	-1000	-1000	-1000	-1000	0	1	0	0	1	0	0	1	0
1052	58511	DNASE2B	NM_021233	1	0	84636802	84653278	84636847	84653138	-0.0949644	4.36825	-1.06852	0.304	0.53	-6.91109	-0.202188	2.1072	-0.296729	0.781	0.906971	-6.61678	2344511	-0.243224	5.59715	-0.735366	-1000	-1000	-1000	-0.616289	5.79003	-2.50758	-1000	-1000	-1000	0.31959	5.31534	0.905564	-1000	-1000	-1000	0	1	0	0	1	0	0	1	0
1052	58511	DNASE2B	NM_058248	1	0	84646621	84653278	84650696	84653138	-0.0949644	4.36825	-1.06852	0.304	0.53	-6.91109	-0.202188	2.1072	-0.296729	0.781	0.906971	-6.61678	2344511	-0.243224	5.59715	-0.735366	-1000	-1000	-1000	-0.616289	5.79003	-2.50758	-1000	-1000	-1000	0.31959	5.31534	0.905564	-1000	-1000	-1000	0	1	0	0	1	0	0	1	0
68728	80135	BXDC5	NM_025065	1	0	84717545	84735948	84717552	84735740	0.869827	10.1102	12.6704	7.9e-09	3.56e-07	10.6799	-0.41149	9.55893	-1.65519	0.169	0.463015	-5.39011	2344542	0.765892	10.4192	8.18364	5.11e-05	0.000215	1.99598	0.445691	9.31131	3.53973	0.00614	0.0105	-3.4333	0.128905	10.8888	1.41018	0.194	0.242	-6.77065	1	0	0	0	1	0	1	0	0
3861	2787	GNG5	NM_005274	1	1	84736679	84744830	84740115	84744361	-0.0772693	11.3971	-1.02003	0.326	0.553	-6.96124	-0.0155623	11.593	-0.0639108	0.952	0.983674	-6.66722	2420427	0.034424	11.0544	0.227813	0.826	0.853	-7.69999	-0.0753382	9.67109	-0.590636	0.569	0.615	-7.61214	-0.375832	11.8006	-3.96289	0.00377	0.00695	-2.82773	0	1	0	0	0	1	0	1	0
23356	64173	SPATA1	NM_022354	1	0	84744600	84791354	84754564	84782547	-1000	-1000	-1000	-1000	-1000	-1000	-1000	-1000	-1000	-1000	-1000	-1000	-1000	-1000	-1000	-1000	-1000	-1000	-1000	-1000	-1000	-1000	-1000	-1000	-1000	-1000	-1000	-1000	-1000	-1000	-1000	0	1	0	0	1	0	0	1	0
3231	1486	CTBS	NM_004388	1	1	84792809	84812685	84793269	84812685	-1.42632	7.01286	-9.63346	2.19e-07	4.51e-06	7.24106	1.61648	7.13944	3.14789	0.0316	0.247792	-3.60145	2420467	-1.30749	9.22706	-12.0535	3.31e-06	3.26e-05	4.98927	-1.28003	8.24863	-10.9105	1.48e-06	9.42e-06	5.50213	-1.25226	8.85052	-17.088	8.05e-08	2.44e-06	8.76875	0	0	1	0	0	1	0	0	1
-1	439927	C1orf180	NM_001033660	1	1	84866500	84873290	84868884	84869977	-0.0403008	5.63707	-0.699174	0.496	0.705	-7.24079	-1000	-1000	-1000	-1000	-1000	-1000	-1000	-1000	-1000	-1000	-1000	-1000	-1000	-1000	-1000	-1000	-1000	-1000	-1000	-1000	-1000	-1000	-1000	-1000	-1000	0	1	0	0	1	0	0	1	0
8522	117178	SSX2IP	NM_014021	1	1	84882186	84928767	84885703	84909489	1.14791	6.98874	10.6007	7e-08	1.83e-06	8.4256	1.14928	5.93394	1.42167	0.224	0.521246	-5.66818	2420521	2.03122	8.96393	9.50652	1.8e-05	9.98e-05	3.14052	1.70258	7.14359	9.79476	3.71e-06	1.88e-05	4.51266	1.53062	8.65524	10.5675	3.86e-06	2.66e-05	4.62763	1	0	0	1	0	0	1	0	0
8123	23566	EDG7	NM_012152	1	1	85052088	85104429	85052116	85104390	-0.110698	6.45619	-0.841072	0.415	0.639	-7.12871	-1.60996	6.76871	-4.41111	0.00998	0.170448	-2.33233	2420615	-0.619416	4.35915	-2.39383	-1000	-1000	-1000	-0.111312	4.71784	-0.431456	-1000	-1000	-1000	1.82698	4.35989	2.84634	-1000	-1000	-1000	0	1	0	0	1	0	0	1	0
12258	255231	MCOLN2	NM_153259	1	1	85163854	85235383	85164955	85235142	-0.859184	10.4535	-4.31574	0.000788	0.00429	-1.25859	-1.76039	5.234	-6.13282	0.00288	0.128289	-0.994288	2420642	-0.584973	11.3321	-4.63069	0.00196	0.0043	-1.99662	-0.844832	11.0038	-6.57854	9.35e-05	0.000257	1.02571	-0.384643	10.2008	-5.38492	0.000558	0.00131	-0.776097	0	0	1	0	0	1	0	0	1
10118	55283	MCOLN3	NM_018298	1	1	85256353	85286756	85257393	85283630	0.0549227	6.38191	0.670403	0.514	0.719	-7.26118	1.28818	4.22877	1.30371	0.258	0.552141	-5.8033	2420681	0.420951	3.75689	0.915703	-1000	-1000	-1000	0.590458	3.92103	2.20564	-1000	-1000	-1000	0.1315	3.66933	0.204195	-1000	-1000	-1000	0	1	0	0	1	0	0	1	0
44922	126820	WDR63	NM_145172	1	0	85300594	85371406	85310212	85371268	-0.013867	4.78712	-0.158556	0.876	0.941	-7.48455	0.230683	4.56041	0.76746	0.483	0.728668	-6.33497	2344731	-0.400924	6.45178	-1.65964	-1000	-1000	-1000	-0.501379	5.21416	-3.08823	-1000	-1000	-1000	0.019215	5.72061	0.0625969	-1000	-1000	-1000	0	1	0	0	1	0	0	1	0
11968	148423	C1orf52	NM_198077	1	1	85490243	85497912	85490899	85497903	0.428196	5.9421	3.79501	0.00213	0.0101	-2.26891	-0.114113	10.3645	-0.508785	0.636	0.826851	-6.51715	2420790	-0.068378	8.73382	-0.738058	0.483	0.536	-7.43202	-0.280033	8.27462	-2.2366	0.0516	0.0728	-5.59249	-0.110518	10.1156	-0.804671	0.443	0.499	-7.41898	0	1	0	0	1	0	0	1	0
2912	8915	BCL10	NM_003921	1	1	85504519	85516170	85505897	85514622	-1.15447	9.4588	-11.0115	4.42e-08	1.29e-06	8.90182	0.589871	7.13943	1.02773	0.359	0.631791	-6.09759	2420808	-1.12162	9.93493	-9.38258	1.98e-05	0.000107	3.03937	-1.1051	8.41202	-14.6841	1.11e-07	1.64e-06	8.27156	-1.1947	9.99638	-10.6433	3.65e-06	2.56e-05	4.68863	0	0	1	0	0	1	0	0	1
8120	23576	DDAH1	NM_012137	1	1	85556756	85703410	85559722	85703315	-0.248873	6.93382	-2.61944	0.0208	0.0709	-4.53289	-0.391524	10.7171	-0.646071	0.551	0.774532	-6.42803	2420832	0.112747	6.04343	0.50531	-1000	-1000	-1000	-0.367069	5.42437	-1.90852	-1000	-1000	-1000	-0.035755	5.89993	-0.145312	-1000	-1000	-1000	0	1	0	0	1	0	0	1	0
1194	3491	CYR61	NM_001554	1	0	85819047	85821976	85819255	85821312	-0.0416893	5.4811	-0.627903	0.541	0.739	-7.28984	-0.19091	12.5067	-0.254928	0.811	0.92054	-6.63054	2344888	-0.555932	5.39697	-1.51345	-1000	-1000	-1000	0.320022	5.50931	1.52736	-1000	-1000	-1000	0.601082	5.46903	1.43413	-1000	-1000	-1000	0	1	0	0	1	0	0	1	0
32378	54680	C1orf181	NM_017953	1	1	85891079	85946688	85892328	85946554	1.28703	9.06302	11.7726	1.96e-08	6.99e-07	9.74512	-0.51479	8.02081	-1.35668	0.242	0.538494	-5.74318	2420958	1.37442	9.25189	10.8233	7.18e-06	5.33e-05	4.14719	1.03238	8.34196	8.70589	9.93e-06	4.01e-05	3.44899	0.89047	9.32022	5.04596	0.000856	0.00191	-1.23952	1	0	0	1	0	0	1	0	0
65061	255631	COL24A1	NM_152890	1	1	85967505	86394708	85968816	86394666	-1.16438	6.55542	-5.40869	0.000108	0.00078	0.785092	-0.290674	4.46047	-1.28534	0.264	0.556234	-5.82391	2421000	-1.03183	8.99509	-5.09485	0.00111	0.00265	-1.3821	-1.19044	9.11878	-12.9207	3.43e-07	3.42e-06	7.07361	-0.790878	7.76112	-4.13979	0.00293	0.00556	-2.5576	0	0	1	0	0	1	0	0	1
12011	57489	ODF2L	NM_001007022	1	1	86587008	86634590	86587020	86621445	-1.01411	5.59272	-9.29247	3.34e-07	6.36e-06	6.80074	-0.0386527	7.97654	-0.150001	0.888	0.95673	-6.65607	2421121	-0.73504	8.8385	-4.80123	0.00158	0.00358	-1.76725	-1.01898	8.56692	-7.05893	5.4e-05	0.000162	1.61822	-0.713194	8.30943	-3.1884	0.012	0.0198	-4.04954	0	0	1	0	0	1	0	0	1
12011	57489	ODF2L	NM_020729	1	1	86587008	86634590	86587020	86625297	-1.01411	5.59272	-9.29247	3.34e-07	6.36e-06	6.80074	-0.0386527	7.97654	-0.150001	0.888	0.95673	-6.65607	2421121	-0.73504	8.8385	-4.80123	0.00158	0.00358	-1.76725	-1.01898	8.56692	-7.05893	5.4e-05	0.000162	1.61822	-0.713194	8.30943	-3.1884	0.012	0.0198	-4.04954	0	0	1	0	0	1	0	0	1
4765	9635	CLCA2	NM_006536	1	0	86662412	86694825	86662518	86693797	0.0873354	4.67726	1.02868	0.322	0.549	-6.95244	1.0724	2.93999	3.0464	0.035	0.256701	-3.71509	2344984	-0.189083	4.33636	-0.548837	-1000	-1000	-1000	-0.18962	4.12738	-1.00281	-1000	-1000	-1000	0.0691848	4.25405	0.276256	-1000	-1000	-1000	0	1	0	0	1	0	0	1	0
984	1179	CLCA1	NM_001285	1	0	86707113	86738559	86707242	86738315	0.005839	6.2947	0.0695409	0.946	0.975	-7.49542	-0.373596	3.64546	-0.816357	0.457	0.709257	-6.29406	2345023	0.104694	5.06638	0.382406	-1000	-1000	-1000	0.100023	4.66957	0.449759	-1000	-1000	-1000	0.0222765	5.10305	0.116858	-1000	-1000	-1000	0	1	0	0	1	0	0	1	0
40808	22802	CLCA4	NM_012128	1	0	86785348	86819017	86785390	86818615	0.0531629	3.86917	0.80714	0.434	0.655	-7.15722	0.56025	3.65901	1.69741	0.16	0.45256	-5.33879	2345061	0.180061	4.89038	0.761999	-1000	-1000	-1000	0.0740647	4.17896	0.513349	-1000	-1000	-1000	-0.280482	4.85419	-1.02288	-1000	-1000	-1000	0	1	0	0	1	0	0	1	0
-1	9629	CLCA3	NM_004921	1	0	86872546	86893645	86872564	86880867	0.079769	3.2442	1.12919	0.279	0.503	-6.84559	-0.320054	1.94726	-1.25071	0.275	0.565802	-5.86243	-1000	-1000	-1000	-1000	-1000	-1000	-1000	-1000	-1000	-1000	-1000	-1000	-1000	-1000	-1000	-1000	-1000	-1000	-1000	0	1	0	0	1	0	0	1	0
9337	51100	SH3GLB1	NM_016009	1	0	86942844	86986453	86943170	86981505	-0.445478	9.11549	-4.10824	0.00117	0.00603	-1.65941	1.28485	10.9523	5.56423	0.00419	0.140624	-1.39273	2345128	0.20881	7.14524	0.447748	0.667	0.711	-7.61742	-0.222173	7.63643	-0.918521	0.382	0.433	-7.35488	-0.570528	7.76147	-3.20298	0.0118	0.0194	-4.02609	0	1	0	0	0	1	0	1	0
3145	9403	40071	NM_004261	1	1	87100717	87152694	87101744	87152381	0.0549499	10.7203	0.420981	0.68	0.831	-7.40368	0.196714	11.8118	0.739179	0.498	0.739372	-6.35777	2421271	0.361169	12.1714	1.99897	0.0827	0.115	-5.91734	-0.0364703	12.3632	-0.315047	0.76	0.792	-7.74703	-0.190447	12.1228	-3.20664	0.0117	0.0193	-4.0202	0	1	0	0	0	1	0	1	0
3145	9403	40071	NM_203341	1	1	87100717	87152694	87101817	87152381	0.0549499	10.7203	0.420981	0.68	0.831	-7.40368	0.196714	11.8118	0.739179	0.498	0.739372	-6.35777	2421271	0.361169	12.1714	1.99897	0.0827	0.115	-5.91734	-0.0364703	12.3632	-0.315047	0.76	0.792	-7.74703	-0.190447	12.1228	-3.20664	0.0117	0.0193	-4.0202	0	1	0	0	0	1	0	1	0
8025	9653	HS2ST1	NM_012262	1	0	87152949	87348251	87153307	87342966	0.709614	8.5009	4.27516	0.00085	0.00459	-1.33673	0.6364	6.39304	2.42323	0.0684	0.328977	-4.44653	2345196	0.200703	10.6865	1.99136	0.0837	0.116	-5.92856	-0.411878	10.1407	-5.35751	0.00043	0.000968	-0.616358	-0.125016	10.3553	-1.69572	0.127	0.164	-6.38648	0	0	1	0	1	0	0	1	0
-1	339524	LOC339524	NM_207357	1	0	87370245	87372865	87370356	87371186	-1000	-1000	-1000	-1000	-1000	-1000	-1000	-1000	-1000	-1000	-1000	-1000	-1000	-1000	-1000	-1000	-1000	-1000	-1000	-1000	-1000	-1000	-1000	-1000	-1000	-1000	-1000	-1000	-1000	-1000	-1000	0	1	0	0	1	0	0	1	0
4927	8543	LMO4	NM_006769	1	0	87566738	87583837	87570286	87583066	-0.947771	8.49692	-3.91328	0.00169	0.0083	-2.03831	0.251637	10.1986	0.502401	0.64	0.829256	-6.52085	2345286	-1.14648	9.76323	-8.91402	2.83e-05	0.000137	2.64608	-1.36298	9.2036	-15.0388	9.03e-08	1.45e-06	8.4953	-1.32051	10.1824	-11.2888	2.29e-06	1.88e-05	5.19254	0	0	1	0	0	1	0	0	1
2054	5586	PKN2	NM_006256	1	0	88922509	89074524	88922851	89071718	-0.617068	7.4384	-6.69544	1.29e-05	0.000127	2.99785	1.07572	6.7805	2.67479	0.0518	0.296586	-4.14487	2345617	-0.671708	10.9867	-5.87579	0.00046	0.00125	-0.416702	-0.671916	9.98172	-6.33633	0.000125	0.000328	0.715891	-0.512367	9.54901	-8.06137	3.12e-05	0.00012	2.35802	0	0	1	0	0	1	0	0	1
1158	2959	GTF2B	NM_001514	1	1	89091204	89129841	89091483	89129769	0.0958875	9.43474	1.52023	0.152	0.335	-6.35614	0.66071	9.4725	2.78298	0.0461	0.283752	-4.01763	2421753	0.315315	8.64367	2.97541	0.0189	0.0313	-4.42052	0.0206488	6.60298	0.0649568	-1000	-1000	-1000	-0.605411	10.691	-4.35864	0.00215	0.00425	-2.22895	0	1	0	0	0	1	1	0	0
2994	56267	KAT3	NM_001008662	1	1	89174043	89231103	89174453	89207734	-0.519186	8.24466	-3.95164	0.00157	0.00778	-1.96364	0.541429	9.45907	2.23584	0.0847	0.35362	-4.67546	2421782	-0.44373	9.79203	-3.83488	0.00554	0.0106	-3.12109	-0.562564	8.29287	-6.20098	0.000147	0.000378	0.539409	-0.34343	10.2623	-3.87551	0.00428	0.00779	-2.96257	0	0	1	0	0	1	0	0	1
2994	56267	KAT3	NM_001008661	1	1	89174043	89231103	89174453	89226620	-0.519186	8.24466	-3.95164	0.00157	0.00778	-1.96364	0.541429	9.45907	2.23584	0.0847	0.35362	-4.67546	2421782	-0.44373	9.79203	-3.83488	0.00554	0.0106	-3.12109	-0.562564	8.29287	-6.20098	0.000147	0.000378	0.539409	-0.34343	10.2623	-3.87551	0.00428	0.00779	-2.96257	0	0	1	0	0	1	0	0	1
-1	494115	RBMXL1	NM_019610	1	1	89218709	89231103	89220924	89222096	-1000	-1000	-1000	-1000	-1000	-1000	-0.913782	8.95623	-3.82137	0.0166	0.199366	-2.89137	4023530	0.893057	11.451	8.34189	4.48e-05	0.000194	2.14088	0.991005	11.166	9.95349	3.24e-06	1.7e-05	4.65927	0.928252	11.2553	13.5366	5.36e-07	7.47e-06	6.75737	1	0	0	1	0	0	1	0	0
74944	2635	GBP3	NM_018284	1	1	89244954	89261136	89245994	89258991	-2.82586	6.07258	-17.8464	1.03e-10	1.85e-08	15.0803	3.09799	4.07606	3.97391	0.0145	0.190312	-2.74126	2421843	-2.4891	7.95117	-21.2479	5.1e-08	4e-06	9.39196	-1.40133	8.20959	-12.6845	4.03e-07	3.82e-06	6.90135	-2.18198	7.92273	-10.3363	4.6e-06	2.99e-05	4.43914	0	0	1	0	0	1	0	0	1
55626	2633	GBP1	NM_002053	1	1	89290593	89303478	89291625	89301504	-2.39461	8.10691	-5.49944	9.24e-05	0.000682	0.948448	1.8124	2.56118	3.08592	0.0336	0.252267	-3.67064	2421883	-2.72122	8.14703	-21.4716	4.72e-08	3.99e-06	9.47099	-1.7006	7.26366	-13.3975	2.5e-07	2.79e-06	7.41252	-2.49816	8.23953	-8.92047	1.44e-05	6.74e-05	3.19631	0	0	1	0	0	1	0	0	1
86912	2634	GBP2	NM_004120	1	1	89345897	89364386	89346445	89360236	0.0329393	5.78008	0.24103	0.813	0.908	-7.46695	2.16357	7.01419	3.24487	0.0286	0.239752	-3.49445	2421883	-2.72122	8.14703	-21.4716	4.72e-08	3.99e-06	9.47099	-1.7006	7.26366	-13.3975	2.5e-07	2.79e-06	7.41252	-2.49816	8.23953	-8.92047	1.44e-05	6.74e-05	3.19631	0	0	1	0	0	1	0	0	1
120150	388646	GBP7	NM_207398	1	1	89370057	89414310	89370419	89410205	-1000	-1000	-1000	-1000	-1000	-1000	-0.198391	2.35435	-0.68631	0.528	0.759703	-6.39859	2421925	-0.472648	4.62802	-1.293	-1000	-1000	-1000	0.018432	4.61591	0.089857	-1000	-1000	-1000	-1.42707	5.19381	-6.28873	-1000	-1000	-1000	0	1	0	0	1	0	0	1	0
10289	115361	GBP4	NM_052941	1	1	89420045	89437149	89423524	89437104	-0.486072	5.38736	-2.87127	0.0128	0.0471	-4.06012	-0.128015	7.01978	-0.230695	0.828	0.928531	-6.63759	2421995	-2.48933	6.14001	-6.96722	0.000152	0.000508	0.79928	-1.28299	5.90827	-6.48033	-1000	-1000	-1000	-1.29745	6.06331	-5.78588	-1000	-1000	-1000	0	1	0	0	1	0	0	0	1
14183	115362	GBP5	NM_052942	1	1	89498852	89511118	89498974	89507825	0.0822007	3.88977	1.26291	0.228	0.441	-6.69086	0.284234	4.28397	0.510641	0.635	0.826532	-6.51607	2422035	-1.13906	4.44598	-4.28326	-1000	-1000	-1000	-0.100846	4.20578	-0.291622	-1000	-1000	-1000	-0.02871	4.77632	-0.0484537	-1000	-1000	-1000	0	1	0	0	1	0	0	1	0
49178	163351	GBP6	NM_198460	1	0	89602204	89624606	89606698	89623615	0.124577	3.60979	1.20219	0.25	0.468	-6.76284	-0.0612023	15.31	-0.261339	0.806	0.918468	-6.62856	2345816	-0.150473	5.94318	-0.476062	-1000	-1000	-1000	-0.229241	5.75033	-1.45633	-1000	-1000	-1000	-0.192328	5.56204	-0.655647	-1000	-1000	-1000	0	1	0	0	1	0	0	1	0
9103	23507	LRRC8B	NM_015350	1	0	89796859	89831802	89820797	89831189	1.09814	7.40012	7.77828	2.54e-06	3.3e-05	4.68613	-0.256053	7.85571	-1.1036	0.328	0.607563	-6.02035	2345880	1.2401	9.23158	7.51234	9.17e-05	0.000341	1.35452	0.313737	8.69489	2.25724	0.0499	0.0706	-5.5594	0.749418	8.03619	4.56443	0.00162	0.00332	-1.9258	0	1	0	1	0	0	1	0	0
12997	84230	LRRC8C	NM_032270	1	0	89871349	89953168	89924620	89953128	-0.230905	8.53107	-3.63721	0.00288	0.0131	-2.57704	0.188334	4.76971	0.579545	0.591	0.799129	-6.47348	2345929	-0.52423	9.95038	-4.22388	0.00329	0.00674	-2.56053	-0.973124	10.8165	-8.88269	8.4e-06	3.52e-05	3.62895	-0.93947	9.32242	-13.7551	4.71e-07	6.89e-06	6.89576	0	0	1	0	0	1	0	0	1
10004	55144	LRRC8D	NM_018103	1	0	90060100	90174146	90171215	90173791	0.547508	9.4678	5.20834	0.000154	0.00105	0.420683	0.502688	10.5436	2.14522	0.0941	0.367526	-4.78704	2346023	0.686937	10.6545	6.25495	0.000308	0.000897	0.0224906	0.363196	10.217	2.67894	0.0249	0.0375	-4.86872	0.495439	9.76021	4.04876	0.00333	0.00624	-2.69612	1	0	0	1	0	0	1	0	0
10297	284695	ZNF326	NM_182976	1	0	90233267	90266368	90233404	90265847	0.96839	8.09623	7.4496	4.09e-06	4.88e-05	4.19003	-0.137175	9.9874	-0.6058	0.575	0.788763	-6.45604	2346074	0.851208	9.59086	6.09833	0.000363	0.00103	-0.156681	0.54426	8.94018	3.13511	0.0118	0.0189	-4.10666	0.580914	8.52551	3.19027	0.012	0.0197	-4.04652	1	0	0	1	0	0	1	0	0
10297	284695	ZNF326	NM_182975	1	0	90233268	90244586	90233404	90243394	0.96839	8.09623	7.4496	4.09e-06	4.88e-05	4.19003	0.244609	7.72246	0.699093	0.521	0.754922	-6.38894	2346074	0.851208	9.59086	6.09833	0.000363	0.00103	-0.156681	0.54426	8.94018	3.13511	0.0118	0.0189	-4.10666	0.580914	8.52551	3.19027	0.012	0.0197	-4.04652	1	0	0	1	0	0	1	0	0
10297	284695	ZNF326	NM_181781	1	0	90233268	90266368	90248237	90265847	-1000	-1000	-1000	-1000	-1000	-1000	-0.137175	9.9874	-0.6058	0.575	0.788763	-6.45604	-1000	-1000	-1000	-1000	-1000	-1000	-1000	-1000	-1000	-1000	-1000	-1000	-1000	-1000	-1000	-1000	-1000	-1000	-1000	0	1	0	0	1	0	0	1	0
10572	343472	BARHL2	NM_020063	1	1	90950167	90955381	90950456	90955339	-1000	-1000	-1000	-1000	-1000	-1000	-0.641118	5.41616	-0.899561	0.416	0.6772	-6.22032	2422398	-0.235109	7.74098	-1.36628	0.211	0.262	-6.78673	-0.321592	8.29991	-1.68133	0.126	0.162	-6.43788	-0.120876	7.42723	-0.469221	0.651	0.697	-7.64596	0	1	0	0	1	0	0	1	0
12971	84146	ZNF644	NM_016620	1	1	91153447	91259617	91154942	91220475	-0.378528	6.49877	-4.11001	0.00116	0.00602	-1.65599	-0.227489	7.98451	-0.551814	0.609	0.811778	-6.49118	2422517	-0.306384	10.8807	-2.43108	0.0428	0.0641	-5.26325	-0.48371	9.65531	-5.35288	0.000433	0.000974	-0.622965	-0.242776	9.81703	-1.92196	0.0891	0.12	-6.05792	0	0	1	0	1	0	0	1	0
12971	84146	ZNF644	NM_032186	1	1	91153447	91260258	91154942	91220475	-0.378528	6.49877	-4.11001	0.00116	0.00602	-1.65599	-0.227489	7.98451	-0.551814	0.609	0.811778	-6.49118	2422517	-0.306384	10.8807	-2.43108	0.0428	0.0641	-5.26325	-0.48371	9.65531	-5.35288	0.000433	0.000974	-0.622965	-0.242776	9.81703	-1.92196	0.0891	0.12	-6.05792	0	0	1	0	1	0	0	1	0
12971	84146	ZNF644	NM_201269	1	1	91153447	91260258	91154942	91220497	-0.378528	6.49877	-4.11001	0.00116	0.00602	-1.65599	-0.939409	8.173	-3.6651	0.0191	0.209405	-3.04925	2422517	-0.306384	10.8807	-2.43108	0.0428	0.0641	-5.26325	-0.48371	9.65531	-5.35288	0.000433	0.000974	-0.622965	-0.242776	9.81703	-1.92196	0.0891	0.12	-6.05792	0	0	1	0	1	0	0	1	0
-1	374992	SEC63D1	NM_198550	1	1	91498909	91590781	91500660	91581604	-1000	-1000	-1000	-1000	-1000	-1000	-1000	-1000	-1000	-1000	-1000	-1000	-1000	-1000	-1000	-1000	-1000	-1000	-1000	-1000	-1000	-1000	-1000	-1000	-1000	-1000	-1000	-1000	-1000	-1000	-1000	0	1	0	0	1	0	0	1	0
87103	164045	HFM1	NM_001017975	1	1	91615587	91639253	91616611	91639226	-0.0420602	3.6062	-0.803314	0.436	0.656	-7.16037	-0.720916	3.89216	-1.37851	0.236	0.532916	-5.71813	2422612	-0.54395	3.99626	-1.1434	-1000	-1000	-1000	-0.270681	3.69489	-0.598681	-1000	-1000	-1000	0.880443	3.70292	1.90488	-1000	-1000	-1000	0	1	0	0	1	0	0	1	0
31166	8317	CDC7	NM_003503	1	0	91739031	91763900	91739861	91762579	1.58463	8.3266	12.9715	5.9e-09	2.9e-07	10.98	-1.11598	9.15013	-4.99873	0.0063	0.154131	-1.82983	2346399	1.96675	8.93826	9.57076	1.72e-05	9.67e-05	3.19248	1.48441	8.34418	11.8362	7.35e-07	5.81e-06	6.25646	1.60045	7.86798	9.16249	1.17e-05	5.86e-05	3.42032	1	0	0	1	0	0	1	0	0
2436	7049	TGFBR3	NM_003243	1	1	91920574	92124242	91921883	92099675	0.406844	6.80947	3.61078	0.00304	0.0137	-2.62866	0.435389	5.77745	0.442138	0.68	0.852514	-6.55367	2422722	0.541934	6.8715	3.94212	0.00479	0.00935	-2.96456	0.206362	7.01115	1.07727	0.309	0.359	-7.19678	0.374159	6.63071	1.2498	-1000	-1000	-1000	0	1	0	0	1	0	1	0	0
21064	676	BRDT	NM_207189	1	0	92187719	92252570	92200899	92252418	0.127614	3.91296	1.3275	0.207	0.414	-6.61125	-0.663048	2.75443	-1.32081	0.253	0.547641	-5.784	2346575	0.098513	4.36139	0.339134	-1000	-1000	-1000	0.0820562	3.73922	0.419765	-1000	-1000	-1000	-0.155896	4.20351	-0.655831	-1000	-1000	-1000	0	1	0	0	1	0	0	1	0
21064	676	BRDT	NM_001726	1	0	92190333	92252570	92200899	92252418	0.127614	3.91296	1.3275	0.207	0.414	-6.61125	-0.663048	2.75443	-1.32081	0.253	0.547641	-5.784	2346575	0.098513	4.36139	0.339134	-1000	-1000	-1000	0.0820562	3.73922	0.419765	-1000	-1000	-1000	-0.155896	4.20351	-0.655831	-1000	-1000	-1000	0	1	0	0	1	0	0	1	0
62402	253152	ABHD7	NM_173567	1	0	92268145	92301680	92268224	92301430	-0.0384726	3.8399	-0.724275	0.481	0.693	-7.22234	0.821716	5.01046	0.831859	0.449	0.702747	-6.28071	2346625	0.433594	7.00882	3.31194	0.0115	0.0202	-3.9037	-0.13927	6.59129	-0.491031	-1000	-1000	-1000	-0.211327	6.41657	-0.711832	-1000	-1000	-1000	0	1	0	0	1	0	1	0	0
18919	284697	BTBD8	NM_183242	1	0	92318480	92385980	92318716	92385945	0.0604452	3.81435	0.997492	0.336	0.564	-6.98387	0.644509	3.61987	0.981332	0.379	0.647729	-6.14321	2346657	-1.52086	4.70356	-3.03277	-1000	-1000	-1000	-1.0779	3.61086	-2.83416	-1000	-1000	-1000	-0.62364	3.16875	-1.2923	-1000	-1000	-1000	0	1	0	0	1	0	0	1	0
18810	388649	C1orf146	NM_001012425	1	0	92456160	92483953	92469565	92483818	-1000	-1000	-1000	-1000	-1000	-1000	-1000	-1000	-1000	-1000	-1000	-1000	-1000	-1000	-1000	-1000	-1000	-1000	-1000	-1000	-1000	-1000	-1000	-1000	-1000	-1000	-1000	-1000	-1000	-1000	-1000	0	1	0	0	1	0	0	1	0
14239	11146	GLMN	NM_053274	1	1	92484544	92537153	92484674	92536143	1.06653	8.20212	10.3853	8.96e-08	2.22e-06	8.1697	-0.491759	8.22596	-2.05271	0.105	0.382479	-4.9013	2422885	0.973951	9.7636	8.20088	5.04e-05	0.000213	2.01188	0.692046	9.15229	7.61161	2.97e-05	9.83e-05	2.26559	1.06493	8.54771	11.845	1.56e-06	1.46e-05	5.6057	1	0	0	1	0	0	1	0	0
11733	79871	C1orf82	NM_024813	1	0	92537194	92626316	92537218	92625155	0.377243	8.42438	4.53857	0.000519	0.003	-0.831826	-0.225929	8.72824	-0.923811	0.405	0.668516	-6.19791	2346738	0.4812	9.08027	3.09501	0.0158	0.0268	-4.23601	0.265318	8.21145	3.35381	0.00826	0.0137	-3.74167	0.249965	8.70302	1.8847	0.0944	0.127	-6.11323	1	0	0	0	1	0	1	0	0
3854	2672	GFI1	NM_005263	1	1	92712909	92725020	92714173	92721631	0.129535	6.40361	1.57339	0.139	0.315	-6.28145	0.343546	3.6284	0.676065	0.534	0.763517	-6.40622	2422967	0.756875	6.80997	5.79678	0.000501	0.00134	-0.510578	0.634427	6.82634	5.05149	0.000651	0.0014	-1.06013	0.598668	6.42902	3.16711	-1000	-1000	-1000	1	0	0	0	1	0	1	0	0
88726	7813	EVI5	NM_005665	1	1	92746841	93030548	92751800	93030538	-0.198443	7.20156	-1.42912	0.176	0.371	-6.4799	1.38899	7.43183	3.78954	0.0171	0.201543	-2.9232	2423017	-0.490178	9.46668	-3.33106	0.0112	0.0197	-3.87459	-0.981186	8.61279	-7.12519	5.02e-05	0.000152	1.69772	-0.495773	8.34387	-2.83146	0.021	0.0326	-4.6256	0	0	1	0	0	1	0	0	1
110649	6125	RPL5	NM_000969	1	0	93070181	93080067	93070259	93080009	1.15892	5.36297	6.37606	2.14e-05	0.000194	2.46973	-0.193717	15.9287	-0.851724	0.439	0.694563	-6.26333	3962587	-0.830361	9.19051	-6.91837	0.000159	0.000527	0.747917	-0.521541	8.34135	-4.06361	0.00272	0.00502	-2.58006	-0.510223	9.0911	-6.508	0.00015	0.000431	0.646532	0	0	1	0	0	1	0	0	1
-1	388650	FAM69A	NM_001006605	1	1	93071040	93199600	93071164	93199573	0.36941	8.6923	2.95836	0.0108	0.0407	-3.89412	-1000	-1000	-1000	-1000	-1000	-1000	2423175	1.05745	9.72609	4.17501	0.00351	0.00713	-2.62983	0.369091	9.72656	4.06676	0.00271	0.005	-2.57502	0.734786	9.41904	6.04845	0.000252	0.000665	0.0847855	1	0	0	1	0	0	1	0	0
7207	22823	MTF2	NM_007358	1	0	93317430	93375710	93317671	93375171	0.617139	8.33129	4.96024	0.00024	0.00155	-0.0374035	-0.973822	10.8222	-3.40037	0.0246	0.22705	-3.32621	2346934	0.492708	11.2029	3.23373	0.0129	0.0223	-4.0231	0.252171	10.7087	3.12652	0.0119	0.0192	-4.12102	0.31859	10.1002	4.64282	0.00146	0.00303	-1.81186	1	0	0	1	0	0	1	0	0
4996	50999	TMED5	NM_016040	1	1	93389998	93418833	93392814	93418386	-0.338252	10.5441	-3.72857	0.00242	0.0113	-2.39862	1.05104	9.43026	2.83045	0.0438	0.278302	-3.96233	2423264	-0.137971	11.4437	-1.11583	0.299	0.355	-7.07805	-0.576954	10.5865	-6.80277	7.21e-05	0.000206	1.30585	-0.4223	10.9185	-5.66096	0.000398	0.000978	-0.410616	0	0	1	0	0	1	0	1	0
35455	343099	CCDC18	NM_206886	1	0	93418507	93516853	93418675	93516621	-0.587469	6.34697	-5.6385	7.27e-05	0.000557	1.19668	-1000	-1000	-1000	-1000	-1000	-1000	2347023	-0.18036	9.34916	-1.72251	0.125	0.166	-6.31537	-0.576954	10.5865	-6.80277	7.21e-05	0.000206	1.30585	-0.4223	10.9185	-5.66096	0.000398	0.000978	-0.410616	0	0	1	0	0	1	0	1	0
38809	1810	DR1	NM_001938	1	0	93584065	93600733	93584790	93598783	0.766399	9.2722	5.35313	0.000119	0.000847	0.684535	0.711211	8.88776	1.53124	0.196	0.491607	-5.53914	2347096	0.573011	10.9653	5.0178	0.00122	0.00287	-1.48198	0.123119	9.72231	0.997749	0.344	0.394	-7.27851	-0.116311	10.7725	-1.06418	0.317	0.373	-7.17404	0	1	0	0	1	0	1	0	0
20898	54874	FNBP1L	NM_001024948	1	0	93686426	93792803	93686426	93789269	0.081102	3.84604	0.378591	0.711	0.85	-7.42162	0.77868	11.8957	1.61841	0.176	0.470805	-5.43461	2347132	-0.0219323	5.15323	-0.0687817	-1000	-1000	-1000	0.138345	5.42811	0.885256	-1000	-1000	-1000	0.12136	5.17846	0.33129	-1000	-1000	-1000	0	1	0	0	1	0	0	1	0
20898	54874	FNBP1L	NM_017737	1	0	93686426	93792803	93686426	93790560	0.081102	3.84604	0.378591	0.711	0.85	-7.42162	0.77868	11.8957	1.61841	0.176	0.470805	-5.43461	2347132	-0.0219323	5.15323	-0.0687817	-1000	-1000	-1000	0.138345	5.42811	0.885256	-1000	-1000	-1000	0.12136	5.17846	0.33129	-1000	-1000	-1000	0	1	0	0	1	0	0	1	0
31181	8412	BCAR3	NM_003567	1	1	93799937	93919972	93800385	93913073	-1.37821	6.6814	-9.21209	3.7e-07	6.88e-06	6.69512	1.85277	9.89917	2.613	0.0554	0.304499	-4.21825	2423422	-1.25886	7.09181	-5.88344	0.000456	0.00124	-0.407655	-1.86262	7.44197	-14.8381	1.02e-07	1.56e-06	8.36937	-1.87064	7.66251	-16.0049	1.38e-07	3.31e-06	8.20471	0	0	1	0	0	1	0	0	1
40961	30836	DNTTIP2	NM_014597	1	1	94107925	94117329	94107994	94117291	1.01278	10.5296	9.58098	2.33e-07	4.74e-06	7.1741	-0.72998	11.4059	-2.5546	0.0591	0.312658	-4.28806	2423597	1.08916	9.00271	5.96377	0.000418	0.00116	-0.313123	1.0537	6.8785	4.16125	0.00235	0.0044	-2.42425	0.309601	10.231	1.64649	0.136	0.175	-6.45542	1	0	0	0	1	0	1	0	0
1557	2730	GCLM	NM_002061	1	1	94125177	94147599	94127133	94147306	1.50617	8.43611	8.73052	6.89e-07	1.13e-05	6.04732	0.618745	9.50159	1.26565	0.27	0.561876	-5.84588	2423625	1.56172	7.64682	8.48333	3.99e-05	0.000178	2.26845	1.25745	6.43672	4.70686	0.00106	0.00216	-1.57558	0.553036	7.93727	4.63898	0.00146	0.00304	-1.81741	1	0	0	1	0	0	1	0	0
298	24	ABCA4	NM_000350	1	1	94230983	94359292	94231380	94359188	0.125596	5.26766	1.1545	0.269	0.49	-6.81738	2.19885	5.1879	1.77145	0.147	0.437937	-5.24827	2423669	-0.520004	5.84685	-1.99473	-1000	-1000	-1000	-0.164698	5.64553	-0.549838	-1000	-1000	-1000	-0.274089	5.65422	-0.758453	-1000	-1000	-1000	0	1	0	0	1	0	0	1	0
3539	9411	ARHGAP29	NM_004815	1	1	94410481	94475776	94412012	94469754	-0.112621	3.78133	-1.29933	0.216	0.426	-6.64634	3.26204	8.46759	13.5283	0.000114	0.0936517	1.9364	2423829	-0.153985	4.06821	-0.646971	-1000	-1000	-1000	0.194026	3.58663	0.983471	-1000	-1000	-1000	-0.590588	3.92757	-2.42938	-1000	-1000	-1000	0	1	0	0	1	0	0	1	0
2140	5825	ABCD3	NM_002858	1	0	94656598	94756671	94656622	94755272	1.4783	7.23321	9.4444	2.76e-07	5.47e-06	6.99845	0.764154	8.55379	2.8845	0.0414	0.272023	-3.89977	2347502	0.879424	9.80995	7.76667	7.31e-05	0.000287	1.60281	0.700469	8.36935	8.55474	1.15e-05	4.5e-05	3.29277	0.764164	9.48866	8.68657	1.77e-05	7.86e-05	2.9749	1	0	0	1	0	0	1	0	0
1511	2152	F3	NM_001993	1	1	94767460	94779902	94768603	94779779	0.131786	5.63329	1.51366	0.153	0.337	-6.36526	0.864358	10.9491	1.01051	0.366	0.637492	-6.11467	2423907	-0.0648283	4.61867	-0.127833	-1000	-1000	-1000	0.115688	4.61608	0.438479	-1000	-1000	-1000	-0.241873	4.23863	-1.05533	-1000	-1000	-1000	0	1	0	0	1	0	0	1	0
64830	126969	SLC44A3	NM_152369	1	0	95058764	95133195	95062645	95133065	0.10934	4.35765	1.66165	0.12	0.283	-6.1536	1.76053	6.10678	3.50904	0.0222	0.219037	-3.21106	2347625	0.593415	5.08492	1.68247	-1000	-1000	-1000	0.430487	4.63504	2.9219	-1000	-1000	-1000	-0.274337	4.76516	-0.843665	-1000	-1000	-1000	0	1	0	0	1	0	0	1	0
37533	1266	CNN3	NM_001839	1	1	95135095	95165288	95135885	95165037	0.425463	4.53989	2.75858	0.0159	0.0566	-4.27315	0.243085	11.8893	0.536554	0.618	0.817191	-6.5006	2424102	1.5241	7.40122	6.81846	0.000175	0.000568	0.642021	1.32724	6.8893	4.29074	0.00193	0.00369	-2.21937	1.13295	7.69774	5.92868	0.000289	0.000749	-0.0661715	1	0	0	1	0	0	1	0	0
49751	199857	ALG14	NM_144988	1	1	95220884	95311070	95221219	95311041	1.18002	7.03344	9.9426	1.51e-07	3.35e-06	7.62976	0.539428	7.51792	1.62333	0.175	0.469396	-5.42868	2424148	1.32073	8.42691	7.21505	0.00012	0.000421	1.05573	0.413765	7.67752	1.62748	0.137	0.175	-6.51381	0.489559	8.66568	5.30111	0.000619	0.00144	-0.88917	0	1	0	1	0	0	1	0	0
45107	148534	TMEM56	NM_152487	1	0	95355571	95431461	95382045	95430011	-0.15999	5.24582	-2.0731	0.058	0.163	-5.5023	1.29311	6.00141	3.04468	0.0351	0.257026	-3.71702	2347732	0.204331	6.16137	0.624315	-1000	-1000	-1000	-1.15923	5.47217	-4.78932	-1000	-1000	-1000	-0.113445	5.13215	-0.409148	-1000	-1000	-1000	0	1	0	0	1	0	0	1	0
22899	25950	RWDD3	NM_015485	1	0	95472354	95485360	95472374	95482856	-0.211817	7.38299	-2.06155	0.0593	0.166	-5.52168	0.13048	9.3827	0.492	0.647	0.833378	-6.52678	2347788	-0.246801	8.48696	-0.995741	0.35	0.408	-7.20285	-0.933927	8.08243	-4.47181	0.00148	0.00292	-1.93643	-0.758318	9.36853	-2.81656	0.0215	0.0332	-4.64967	0	0	1	0	0	1	0	1	0
23162	58155	PTBP2	NM_021190	1	0	96959965	97052933	96960008	97051548	0.389543	6.37779	4.14161	0.00109	0.00571	-1.59476	-0.75659	9.5682	-2.70722	0.05	0.292429	-4.10656	2348060	0.512052	10.228	4.91341	0.00138	0.00319	-1.61865	0.177657	9.20233	1.81407	0.102	0.135	-6.24536	0.858032	8.75772	8.33816	2.41e-05	9.94e-05	2.63577	0	1	0	1	0	0	1	0	0
85	1806	DPYD	NM_000110	1	1	97315889	98159166	97317119	98159065	-0.964553	7.53363	-3.68551	0.00263	0.0121	-2.48269	-0.335571	3.04153	-1.04108	0.353	0.626821	-6.08423	2424524	-0.73452	10.2936	-5.09981	0.00111	0.00264	-1.37572	-0.623675	9.72348	-8.9062	8.22e-06	3.46e-05	3.65266	-0.448644	9.30573	-6.79667	0.00011	0.000331	0.985712	0	0	1	0	0	1	0	0	1
22941	51375	SNX7	NM_015976	1	0	98899800	98998641	98923040	98998274	0.00190918	4.62385	0.025979	0.98	0.991	-7.49765	0.320045	10.113	0.684448	0.529	0.760142	-6.39998	2348437	1.02444	3.93105	3.34822	-1000	-1000	-1000	-0.53825	4.12412	-1.07519	-1000	-1000	-1000	0.489878	3.6359	0.670137	-1000	-1000	-1000	0	1	0	0	1	0	0	1	0
22941	51375	SNX7	NM_152238	1	0	98900005	98998641	98923040	98998274	0.00190918	4.62385	0.025979	0.98	0.991	-7.49765	0.320045	10.113	0.684448	0.529	0.760142	-6.39998	2348437	1.02444	3.93105	3.34822	-1000	-1000	-1000	-0.53825	4.12412	-1.07519	-1000	-1000	-1000	0.489878	3.6359	0.670137	-1000	-1000	-1000	0	1	0	0	1	0	0	1	0
25279	163404	PAP2D	NM_001010861	1	1	99128390	99243036	99131215	99242814	0.0616552	4.15776	0.87578	0.397	0.622	-7.09846	-1.45019	5.83862	-4.19039	0.012	0.179868	-2.53489	-1000	-1000	-1000	-1000	-1000	-1000	-1000	-1000	-1000	-1000	-1000	-1000	-1000	-1000	-1000	-1000	-1000	-1000	-1000	0	1	0	0	1	0	0	1	0
25279	163404	PAP2D	NM_001037317	1	1	99128390	99243036	99131215	99242814	0.0616552	4.15776	0.87578	0.397	0.622	-7.09846	-1.45019	5.83862	-4.19039	0.012	0.179868	-2.53489	-1000	-1000	-1000	-1000	-1000	-1000	-1000	-1000	-1000	-1000	-1000	-1000	-1000	-1000	-1000	-1000	-1000	-1000	-1000	0	1	0	0	1	0	0	1	0
8895	9890	LPPR4	NM_014839	1	0	99502487	99547723	99502593	99545153	0.0197154	3.8978	0.295499	0.772	0.886	-7.45138	-1.69039	6.26963	-3.53979	0.0215	0.216697	-3.17885	2348514	-0.251081	8.70652	-0.777942	0.46	0.515	-7.40028	-0.350082	9.63559	-1.59586	0.144	0.183	-6.55775	-0.792917	9.18308	-5.64243	0.000407	0.000995	-0.434811	0	1	0	0	0	1	0	1	0
9804	54873	PALMD	NM_017734	1	0	99884185	99932839	99884461	99932205	-0.11062	3.72627	-2.17839	0.0478	0.14	-5.32326	-0.386073	3.82471	-1.00567	0.368	0.638782	-6.11944	2348569	0.545926	5.60728	1.8044	-1000	-1000	-1000	0.267526	5.36243	1.86411	-1000	-1000	-1000	0.230886	5.40213	0.699709	-1000	-1000	-1000	0	1	0	0	1	0	0	1	0
40653	391059	FRRS1	NM_001013660	1	1	99946846	100003936	99947041	99986911	-0.0105546	3.61387	-0.159513	0.876	0.941	-7.48439	0.928345	6.15782	1.27828	0.266	0.558162	-5.8318	-1000	-1000	-1000	-1000	-1000	-1000	-1000	-1000	-1000	-1000	-1000	-1000	-1000	-1000	-1000	-1000	-1000	-1000	-1000	0	1	0	0	1	0	0	1	0
536	178	AGL	NM_000642	1	0	100088227	100162166	100089186	100159794	0.171858	9.34962	1.19418	0.253	0.472	-6.77214	-0.414837	8.18187	-1.61879	0.176	0.470805	-5.43416	2348634	0.237104	9.94811	1.93217	0.0915	0.125	-6.01545	-0.306884	8.36294	-3.40176	0.00764	0.0128	-3.66193	0.084875	8.96128	1.08693	0.307	0.362	-7.15002	0	0	1	0	1	0	0	1	0
536	178	AGL	NM_000028	1	0	100088632	100162166	100089186	100159794	0.171858	9.34962	1.19418	0.253	0.472	-6.77214	-0.414837	8.18187	-1.61879	0.176	0.470805	-5.43416	2348634	0.237104	9.94811	1.93217	0.0915	0.125	-6.01545	-0.306884	8.36294	-3.40176	0.00764	0.0128	-3.66193	0.084875	8.96128	1.08693	0.307	0.362	-7.15002	0	0	1	0	1	0	0	1	0
536	178	AGL	NM_000643	1	0	100088632	100162166	100089186	100159794	0.171858	9.34962	1.19418	0.253	0.472	-6.77214	-1000	-1000	-1000	-1000	-1000	-1000	2348634	0.237104	9.94811	1.93217	0.0915	0.125	-6.01545	-0.306884	8.36294	-3.40176	0.00764	0.0128	-3.66193	0.084875	8.96128	1.08693	0.307	0.362	-7.15002	0	0	1	0	1	0	0	1	0
536	178	AGL	NM_000644	1	0	100088632	100162166	100089186	100159794	0.171858	9.34962	1.19418	0.253	0.472	-6.77214	-1000	-1000	-1000	-1000	-1000	-1000	2348634	0.237104	9.94811	1.93217	0.0915	0.125	-6.01545	-0.306884	8.36294	-3.40176	0.00764	0.0128	-3.66193	0.084875	8.96128	1.08693	0.307	0.362	-7.15002	0	0	1	0	1	0	0	1	0
536	178	AGL	NM_000646	1	0	100089118	100162166	100090813	100159794	0.171858	9.34962	1.19418	0.253	0.472	-6.77214	-0.414837	8.18187	-1.61879	0.176	0.470805	-5.43416	2348634	0.237104	9.94811	1.93217	0.0915	0.125	-6.01545	-0.306884	8.36294	-3.40176	0.00764	0.0128	-3.66193	0.084875	8.96128	1.08693	0.307	0.362	-7.15002	0	0	1	0	1	0	0	1	0
536	178	AGL	NM_000645	1	0	100099353	100162166	100099615	100159794	0.171858	9.34962	1.19418	0.253	0.472	-6.77214	-0.414837	8.18187	-1.61879	0.176	0.470805	-5.43416	2348634	0.237104	9.94811	1.93217	0.0915	0.125	-6.01545	-0.306884	8.36294	-3.40176	0.00764	0.0128	-3.66193	0.084875	8.96128	1.08693	0.307	0.362	-7.15002	0	0	1	0	1	0	0	1	0
40826	23443	SLC35A3	NM_012243	1	0	100208127	100261593	100231698	100260619	0.287847	7.12109	2.63019	0.0204	0.0697	-4.51297	0.398657	7.51171	1.36165	0.241	0.537099	-5.73749	2348702	0.0253557	9.46523	0.247333	0.811	0.841	-7.69479	-0.16058	8.31375	-1.43806	0.184	0.226	-6.76944	0.0769047	8.61067	0.712488	0.495	0.55	-7.49206	0	1	0	0	1	0	0	1	0
22456	64645	HIAT1	NM_033055	1	0	100276376	100321514	100276376	100320352	-0.046277	9.65419	-0.518459	0.613	0.788	-7.35542	0.53101	9.07585	1.45348	0.215	0.512822	-5.63103	2348757	0.109164	11.6253	0.80939	0.443	0.499	-7.37425	-0.0389692	10.8983	-0.410916	0.691	0.73	-7.70905	0.0585567	10.7796	0.75096	0.473	0.528	-7.4625	0	1	0	0	1	0	0	1	0
45668	163786	SASS6	NM_194292	1	1	100321691	100371098	100323471	100370957	0.635802	7.52188	7.14803	6.41e-06	7.05e-05	3.72244	-0.23192	6.81411	-0.826518	0.452	0.704838	-6.28533	2425118	1.15235	9.23749	9.96648	1.29e-05	7.93e-05	3.50583	0.984001	7.37922	7.3259	4.03e-05	0.000126	1.93536	0.831894	8.07118	5.52323	0.00047	0.00113	-0.591646	1	0	0	1	0	0	1	0	0
6875	54482	CCDC76	NM_019083	1	0	100371306	100388640	100371312	100386963	0.317136	8.21284	2.39662	0.0318	0.101	-4.9394	-0.798583	8.53762	-3.11494	0.0326	0.250247	-3.63816	2348792	0.295614	9.80064	2.66071	0.0302	0.0473	-4.90819	-0.408414	8.36353	-4.68228	0.00109	0.00222	-1.61296	0.0299692	8.67771	0.217186	0.833	0.861	-7.74107	0	0	1	0	1	0	1	0	0
13668	127495	LRRC39	NM_144620	1	1	100387000	100416358	100387185	100406659	0.0440448	4.80686	0.582893	0.57	0.759	-7.31825	0.244149	4.20163	0.429462	0.688	0.857967	-6.56008	2425173	-0.300346	6.25868	-0.72692	-1000	-1000	-1000	-0.0245632	5.35332	-0.0794362	-1000	-1000	-1000	0.133879	4.91418	0.316411	-1000	-1000	-1000	0	1	0	0	1	0	0	1	0
1444	1629	DBT	NM_001918	1	1	100425066	100487996	100434398	100487963	-0.551518	10.5418	-3.46342	0.00404	0.0176	-2.91637	-0.444441	7.44138	-1.46546	0.212	0.51004	-5.61697	2425212	0.2621	9.45239	1.85259	0.103	0.14	-6.13083	-0.098305	8.24065	-0.818685	0.434	0.483	-7.44357	0.0971898	8.67975	0.830964	0.429	0.485	-7.39673	0	1	0	0	1	0	0	1	0
2766	8634	RTCD1	NM_003729	1	0	100504350	100529914	100504519	100529647	-0.691568	5.29004	-4.75187	0.00035	0.00213	-0.427629	0.727439	11.9244	2.05694	0.104	0.381719	-4.89607	2348854	-0.36512	10.1608	-3.5442	0.0083	0.0151	-3.55245	-0.593063	9.57446	-7.07513	5.3e-05	0.000159	1.6377	-0.579865	10.5707	-7.43484	5.7e-05	0.000194	1.70031	0	0	1	0	0	1	0	0	1
75343	8556	CDC14A	NM_033313	1	0	100590634	100722873	100591098	100722609	-0.450457	4.39822	-5.29437	0.000132	0.000926	0.577778	0.2315	6.12106	0.687233	0.527	0.759333	-6.3979	2348896	-1.26946	8.88076	-11.4771	4.71e-06	4.08e-05	4.60544	-1.68683	8.52436	-20.1351	6.69e-09	3.44e-07	11.2199	-1.03288	7.68814	-4.57075	0.00161	0.0033	-1.91658	0	0	1	0	0	1	0	0	1
75343	8556	CDC14A	NM_033312	1	0	100590634	100737601	100591098	100737522	-0.450457	4.39822	-5.29437	0.000132	0.000926	0.577778	0.2315	6.12106	0.687233	0.527	0.759333	-6.3979	2348896	-1.26946	8.88076	-11.4771	4.71e-06	4.08e-05	4.60544	-1.68683	8.52436	-20.1351	6.69e-09	3.44e-07	11.2199	-1.03288	7.68814	-4.57075	0.00161	0.0033	-1.91658	0	0	1	0	0	1	0	0	1
75343	8556	CDC14A	NM_003672	1	0	100590634	100758419	100591098	100756423	-0.450457	4.39822	-5.29437	0.000132	0.000926	0.577778	0.90776	4.158	2.89938	0.0408	0.270568	-3.88263	2348896	-1.26946	8.88076	-11.4771	4.71e-06	4.08e-05	4.60544	-1.68683	8.52436	-20.1351	6.69e-09	3.44e-07	11.2199	-1.03288	7.68814	-4.57075	0.00161	0.0033	-1.91658	0	0	1	0	0	1	0	0	1
11104	54112	GPR88	NM_022049	1	0	100776315	100780169	100777110	100778264	-0.0392454	3.89006	-0.681767	0.507	0.713	-7.25322	-1000	-1000	-1000	-1000	-1000	-1000	2348962	0.230464	5.57779	0.728572	-1000	-1000	-1000	-0.163218	5.12973	-0.700053	-1000	-1000	-1000	-0.026228	5.39263	-0.0782459	-1000	-1000	-1000	0	1	0	0	1	0	0	1	0
838	7412	VCAM1	NM_001078	1	0	100957884	100977186	100958004	100976426	-0.936962	6.18928	-2.32218	0.0366	0.113	-5.07211	-0.434185	4.24064	-0.563885	0.601	0.806203	-6.48356	2348992	-1.22634	5.0209	-3.45082	-1000	-1000	-1000	-1.10247	4.77238	-5.09208	-1000	-1000	-1000	-1.94779	5.46105	-8.31577	-1000	-1000	-1000	0	1	0	0	1	0	0	1	0
838	7412	VCAM1	NM_080682	1	0	100957884	100977186	100958004	100976426	-0.936962	6.18928	-2.32218	0.0366	0.113	-5.07211	-0.434185	4.24064	-0.563885	0.601	0.806203	-6.48356	2348992	-1.22634	5.0209	-3.45082	-1000	-1000	-1000	-1.10247	4.77238	-5.09208	-1000	-1000	-1000	-1.94779	5.46105	-8.31577	-1000	-1000	-1000	0	1	0	0	1	0	0	1	0
1102	2135	EXTL2	NM_001033025	1	1	101110528	101133005	101112085	101126900	-0.0428202	8.61894	-0.379586	0.71	0.849	-7.42123	-0.741366	6.77492	-3.13037	0.0321	0.249197	-3.62095	2425400	0.5065	7.13942	4.00483	0.0044	0.00868	-2.87372	0.519378	5.42353	2.76787	-1000	-1000	-1000	0.240574	8.52416	2.37445	0.0435	0.0629	-5.35916	0	1	0	0	1	0	1	0	0
1102	2135	EXTL2	NM_001439	1	1	101110528	101133005	101112085	101126900	-0.0428202	8.61894	-0.379586	0.71	0.849	-7.42123	-0.741366	6.77492	-3.13037	0.0321	0.249197	-3.62095	2425400	0.5065	7.13942	4.00483	0.0044	0.00868	-2.87372	0.519378	5.42353	2.76787	-1000	-1000	-1000	0.240574	8.52416	2.37445	0.0435	0.0629	-5.35916	0	1	0	0	1	0	1	0	0
11332	148867	SLC30A7	NM_133496	1	0	101134265	101217579	101134406	101213000	0.112817	5.96776	0.876458	0.396	0.621	-7.09786	0.672052	7.2632	2.0135	0.11	0.388691	-4.94977	2349043	-0.0750033	9.88579	-0.452025	0.664	0.708	-7.6153	-0.411735	9.60142	-4.37961	0.0017	0.00329	-2.07998	-0.109378	8.64774	-1.54516	0.159	0.202	-6.59394	0	0	1	0	1	0	0	1	0
6471	51611	DPH5	NM_001077395	1	1	101227770	101263949	101228551	101263586	1.32001	5.58704	12.7385	7.39e-09	3.42e-07	10.7484	-0.320074	10.076	-1.30513	0.258	0.551775	-5.8017	2425447	1.04581	10.5067	7.63631	8.21e-05	0.000313	1.47637	0.619463	8.96697	4.74367	0.001	0.00206	-1.51974	0.987138	10.5231	10.5184	4.01e-06	2.72e-05	4.58792	1	0	0	1	0	0	1	0	0
-1	-1	DPH5	NM_001077394	1	1	101227770	101263949	101228551	101263586	-1000	-1000	-1000	-1000	-1000	-1000	-0.320074	10.076	-1.30513	0.258	0.551775	-5.8017	2425447	1.04581	10.5067	7.63631	8.21e-05	0.000313	1.47637	0.619463	8.96697	4.74367	0.001	0.00206	-1.51974	0.987138	10.5231	10.5184	4.01e-06	2.72e-05	4.58792	1	0	0	1	0	0	1	0	0
-1	-1	DPH5	NM_015958	1	1	101227770	101263949	101228551	101263586	-1000	-1000	-1000	-1000	-1000	-1000	-0.320074	10.076	-1.30513	0.258	0.551775	-5.8017	2425447	1.04581	10.5067	7.63631	8.21e-05	0.000313	1.47637	0.619463	8.96697	4.74367	0.001	0.00206	-1.51974	0.987138	10.5231	10.5184	4.01e-06	2.72e-05	4.58792	1	0	0	1	0	0	1	0	0
1071	1901	EDG1	NM_001400	1	0	101475042	101479660	101477128	101478276	-0.603676	6.50806	-2.96597	0.0107	0.0402	-3.87957	-0.651424	5.96537	-0.834342	0.448	0.70176	-6.27855	2349129	-0.788974	9.71306	-7.32902	0.000108	0.000388	1.17139	-0.327204	9.76378	-2.50137	0.0333	0.049	-5.16237	-0.560105	9.10731	-5.014	0.000892	0.00198	-1.28405	0	0	1	0	0	1	0	0	1
17103	118427	OLFM3	NM_058170	1	1	102040722	102235135	102042381	102234959	-0.0429521	3.46972	-0.801992	0.437	0.657	-7.16146	-0.158178	1.74364	-0.597672	0.58	0.791556	-6.4615	2425652	0.336405	5.02931	0.941447	-1000	-1000	-1000	0.0264817	4.11271	0.108986	-1000	-1000	-1000	-0.282662	5.08843	-0.67064	-1000	-1000	-1000	0	1	0	0	1	0	0	1	0
56389	1301	COL11A1	NM_001854	1	1	103114611	103346639	103116162	103346321	0.0501082	3.33495	1.00226	0.334	0.561	-6.97912	2.16692	9.85628	3.13401	0.032	0.248793	-3.61689	2425756	-0.848323	8.89352	-4.20589	0.00337	0.00687	-2.586	-0.150686	8.64655	-0.536737	0.604	0.649	-7.64465	-0.504583	8.4056	-1.46163	0.18	0.226	-6.70442	0	1	0	0	1	0	0	0	1
56389	1301	COL11A1	NM_080629	1	1	103114611	103346639	103116162	103346321	0.0501082	3.33495	1.00226	0.334	0.561	-6.97912	2.16692	9.85628	3.13401	0.032	0.248793	-3.61689	2425756	-0.848323	8.89352	-4.20589	0.00337	0.00687	-2.586	-0.150686	8.64655	-0.536737	0.604	0.649	-7.64465	-0.504583	8.4056	-1.46163	0.18	0.226	-6.70442	0	1	0	0	1	0	0	0	1
56389	1301	COL11A1	NM_080630	1	1	103114611	103346639	103116162	103346321	0.0501082	3.33495	1.00226	0.334	0.561	-6.97912	2.16692	9.85628	3.13401	0.032	0.248793	-3.61689	2425756	-0.848323	8.89352	-4.20589	0.00337	0.00687	-2.586	-0.150686	8.64655	-0.536737	0.604	0.649	-7.64465	-0.504583	8.4056	-1.46163	0.18	0.226	-6.70442	0	1	0	0	1	0	0	0	1
9746	55599	RNPC3	NM_017619	1	0	103841165	103899379	103841280	103895924	-0.358747	7.69844	-3.82035	0.00202	0.00968	-2.21949	-0.0775647	8.01765	-0.25712	0.809	0.919703	-6.62987	2349345	-0.190168	9.02731	-1.39733	0.202	0.252	-6.74804	-0.509575	8.70444	-6.79215	7.3e-05	0.000208	1.29272	-0.226814	9.08142	-1.44304	0.185	0.231	-6.72851	0	0	1	0	1	0	0	1	0
117989	280	AMY2B	NM_020978	1	0	103898844	103923669	103915747	103923644	-0.466844	8.4679	-5.58555	7.97e-05	0.000603	1.10248	-1000	-1000	-1000	-1000	-1000	-1000	2349345	-0.190168	9.02731	-1.39733	0.202	0.252	-6.74804	-0.509575	8.70444	-6.79215	7.3e-05	0.000208	1.29272	-0.226814	9.08142	-1.44304	0.185	0.231	-6.72851	0	0	1	0	1	0	0	1	0
20179	279	AMY2A	NM_000699	1	0	103961521	103969915	103961585	103969890	-0.179319	3.98114	-3.17299	0.00712	0.0286	-3.48106	-1000	-1000	-1000	-1000	-1000	-1000	2349402	-0.979949	5.63995	-3.45118	-1000	-1000	-1000	-1.3499	5.51544	-5.69293	-1000	-1000	-1000	-1.30064	5.73477	-3.69672	-1000	-1000	-1000	0	1	0	0	1	0	0	1	0
-1	276	AMY1A	NM_001008221	1	0	103999663	104008694	104000475	104008664	-0.179319	3.98114	-3.17299	0.00712	0.0286	-3.48106	0.160784	6.16534	0.393539	0.713	0.871889	-6.57734	2349402	-0.979949	5.63995	-3.45118	-1000	-1000	-1000	-1.3499	5.51544	-5.69293	-1000	-1000	-1000	-1.30064	5.73477	-3.69672	-1000	-1000	-1000	0	1	0	0	1	0	0	1	0
-1	276	AMY1A	NM_004038	1	0	103999824	104008694	104000475	104008664	-0.179319	3.98114	-3.17299	0.00712	0.0286	-3.48106	0.160784	6.16534	0.393539	0.713	0.871889	-6.57734	2349402	-0.979949	5.63995	-3.45118	-1000	-1000	-1000	-1.3499	5.51544	-5.69293	-1000	-1000	-1000	-1.30064	5.73477	-3.69672	-1000	-1000	-1000	0	1	0	0	1	0	0	1	0
86951	278	AMY1C	NM_001008219	1	0	103999825	104008694	104000475	104008664	-0.179319	3.98114	-3.17299	0.00712	0.0286	-3.48106	0.160784	6.16534	0.393539	0.713	0.871889	-6.57734	2349402	-0.979949	5.63995	-3.45118	-1000	-1000	-1000	-1.3499	5.51544	-5.69293	-1000	-1000	-1000	-1.30064	5.73477	-3.69672	-1000	-1000	-1000	0	1	0	0	1	0	0	1	0
-1	277	AMY1B	NM_001008218	1	0	103999847	104008694	104000475	104008664	-0.179319	3.98114	-3.17299	0.00712	0.0286	-3.48106	0.160784	6.16534	0.393539	0.713	0.871889	-6.57734	2349402	-0.979949	5.63995	-3.45118	-1000	-1000	-1000	-1.3499	5.51544	-5.69293	-1000	-1000	-1000	-1.30064	5.73477	-3.69672	-1000	-1000	-1000	0	1	0	0	1	0	0	1	0
-1	277	AMY1B	NM_001008218	1	1	104031563	104040411	104031593	104039783	-0.179319	3.98114	-3.17299	0.00712	0.0286	-3.48106	0.160784	6.16534	0.393539	0.713	0.871889	-6.57734	2349402	-0.979949	5.63995	-3.45118	-1000	-1000	-1000	-1.3499	5.51544	-5.69293	-1000	-1000	-1000	-1.30064	5.73477	-3.69672	-1000	-1000	-1000	0	1	0	0	1	0	0	1	0
86951	278	AMY1C	NM_001008219	1	1	104031563	104040433	104031593	104039783	-0.179319	3.98114	-3.17299	0.00712	0.0286	-3.48106	0.160784	6.16534	0.393539	0.713	0.871889	-6.57734	2349402	-0.979949	5.63995	-3.45118	-1000	-1000	-1000	-1.3499	5.51544	-5.69293	-1000	-1000	-1000	-1.30064	5.73477	-3.69672	-1000	-1000	-1000	0	1	0	0	1	0	0	1	0
-1	276	AMY1A	NM_004038	1	1	104031563	104040434	104031593	104039783	-0.179319	3.98114	-3.17299	0.00712	0.0286	-3.48106	0.160784	6.16534	0.393539	0.713	0.871889	-6.57734	2349402	-0.979949	5.63995	-3.45118	-1000	-1000	-1000	-1.3499	5.51544	-5.69293	-1000	-1000	-1000	-1.30064	5.73477	-3.69672	-1000	-1000	-1000	0	1	0	0	1	0	0	1	0
-1	276	AMY1A	NM_001008221	1	1	104031563	104040595	104031593	104039783	-0.179319	3.98114	-3.17299	0.00712	0.0286	-3.48106	0.160784	6.16534	0.393539	0.713	0.871889	-6.57734	2349402	-0.979949	5.63995	-3.45118	-1000	-1000	-1000	-1.3499	5.51544	-5.69293	-1000	-1000	-1000	-1.30064	5.73477	-3.69672	-1000	-1000	-1000	0	1	0	0	1	0	0	1	0
-1	276	AMY1A	NM_001008221	1	0	104093801	104102832	104094614	104102802	-0.179319	3.98114	-3.17299	0.00712	0.0286	-3.48106	0.160784	6.16534	0.393539	0.713	0.871889	-6.57734	2349402	-0.979949	5.63995	-3.45118	-1000	-1000	-1000	-1.3499	5.51544	-5.69293	-1000	-1000	-1000	-1.30064	5.73477	-3.69672	-1000	-1000	-1000	0	1	0	0	1	0	0	1	0
-1	276	AMY1A	NM_004038	1	0	104093962	104102832	104094614	104102802	-0.179319	3.98114	-3.17299	0.00712	0.0286	-3.48106	0.160784	6.16534	0.393539	0.713	0.871889	-6.57734	2349402	-0.979949	5.63995	-3.45118	-1000	-1000	-1000	-1.3499	5.51544	-5.69293	-1000	-1000	-1000	-1.30064	5.73477	-3.69672	-1000	-1000	-1000	0	1	0	0	1	0	0	1	0
86951	278	AMY1C	NM_001008219	1	0	104093963	104102832	104094614	104102802	-0.179319	3.98114	-3.17299	0.00712	0.0286	-3.48106	0.160784	6.16534	0.393539	0.713	0.871889	-6.57734	2349402	-0.979949	5.63995	-3.45118	-1000	-1000	-1000	-1.3499	5.51544	-5.69293	-1000	-1000	-1000	-1.30064	5.73477	-3.69672	-1000	-1000	-1000	0	1	0	0	1	0	0	1	0
-1	277	AMY1B	NM_001008218	1	0	104093985	104102832	104094614	104102802	-0.179319	3.98114	-3.17299	0.00712	0.0286	-3.48106	0.160784	6.16534	0.393539	0.713	0.871889	-6.57734	2349402	-0.979949	5.63995	-3.45118	-1000	-1000	-1000	-1.3499	5.51544	-5.69293	-1000	-1000	-1000	-1.30064	5.73477	-3.69672	-1000	-1000	-1000	0	1	0	0	1	0	0	1	0
10024	55170	PRMT6	NM_018137	1	0	107400931	107403436	107401037	107401987	1.40884	8.00481	11.1118	3.96e-08	1.19e-06	9.01578	0.0507037	9.29864	0.19337	0.856	0.942114	-6.6471	2349848	1.16627	8.72322	6.56465	0.000225	0.000695	0.367733	0.988464	8.1376	6.12301	0.000161	0.00041	0.436638	0.65057	8.87884	10.976	2.86e-06	2.2e-05	4.95171	1	0	0	1	0	0	1	0	0
101674	22854	NTNG1	NM_014917	1	0	107484267	107825993	107492738	107824984	-0.40365	5.32989	-2.8852	0.0125	0.0461	-4.03365	0.276823	5.59911	0.558727	0.604	0.808622	-6.48684	2349863	-1.13437	7.30097	-10.2736	1.04e-05	6.84e-05	3.74133	-0.952635	6.69381	-7.27682	4.25e-05	0.000132	1.87768	-1.02595	6.4142	-5.06392	-1000	-1000	-1000	0	0	1	0	1	0	0	0	1
38143	10451	VAV3	NM_006113	1	1	107915312	108309060	107917475	108309013	0.147852	4.61672	2.53756	0.0243	0.0808	-4.68375	1.21212	9.03243	4.07298	0.0133	0.185075	-2.64585	2426385	0.232661	4.1153	0.44347	-1000	-1000	-1000	0.192424	3.73368	1.05353	-1000	-1000	-1000	0.0877037	4.29728	0.37585	-1000	-1000	-1000	0	1	0	0	1	0	0	1	0
92693	29957	SLC25A24	NM_213651	1	1	108478971	108536885	108480797	108536765	-1.33651	6.54614	-5.81238	5.41e-05	0.000432	1.50347	1.26437	11.3724	1.55576	0.19	0.485831	-5.50989	2426559	-1.04753	7.91595	-7.66795	7.98e-05	0.000307	1.50722	-1.22921	7.35175	-8.67931	1.02e-05	4.09e-05	3.42168	-1.16479	8.07703	-4.86102	0.00109	0.00236	-1.49923	0	0	1	0	0	1	0	0	1
92693	29957	SLC25A24	NM_013386	1	1	108478971	108544420	108480797	108544282	-1.33651	6.54614	-5.81238	5.41e-05	0.000432	1.50347	1.26437	11.3724	1.55576	0.19	0.485831	-5.50989	2426559	-1.04753	7.91595	-7.66795	7.98e-05	0.000307	1.50722	-1.22921	7.35175	-8.67931	1.02e-05	4.09e-05	3.42168	-1.16479	8.07703	-4.86102	0.00109	0.00236	-1.49923	0	0	1	0	0	1	0	0	1
-1	148545	NBPF4	NM_152488	1	1	108566609	108588195	108582943	108587905	-1000	-1000	-1000	-1000	-1000	-1000	-1000	-1000	-1000	-1000	-1000	-1000	-1000	-1000	-1000	-1000	-1000	-1000	-1000	-1000	-1000	-1000	-1000	-1000	-1000	-1000	-1000	-1000	-1000	-1000	-1000	0	1	0	0	1	0	0	1	0
46568	284611	FAM102B	NM_001010883	1	0	108904621	108983470	108904666	108979294	-1.19336	7.79463	-5.77251	5.79e-05	0.000457	1.43349	0.621252	8.78446	1.91167	0.124	0.407633	-5.07562	-1000	-1000	-1000	-1000	-1000	-1000	-1000	-1000	-1000	-1000	-1000	-1000	-1000	-1000	-1000	-1000	-1000	-1000	-1000	0	1	0	0	1	0	0	1	0
32638	113802	C1orf59	NM_144584	1	1	108992446	109005670	108992710	109004028	-0.013492	5.48201	-0.137976	0.892	0.949	-7.48782	-1.88988	8.6796	-7.50565	0.00129	0.113466	-0.175404	2426676	-0.755167	4.8266	-2.42847	-1000	-1000	-1000	0.34506	4.26955	1.80025	-1000	-1000	-1000	-0.279666	4.28839	-0.680063	-1000	-1000	-1000	0	1	0	0	1	0	0	1	0
9986	55119	PRPF38B	NM_018061	1	0	109036660	109045685	109036736	109044164	0.709643	9.06114	6.87034	9.79e-06	0.000101	3.28115	-0.391975	9.77649	-1.68736	0.162	0.454556	-5.35103	2350287	0.196152	10.4803	1.39289	0.203	0.253	-6.7536	0.265244	11.1221	3.46269	0.00694	0.0117	-3.56081	0.410627	10.0503	4.8566	0.0011	0.00237	-1.50549	1	0	0	1	0	0	0	1	0
18551	163479	FNDC7	NM_173532	1	0	109066555	109086887	109066580	109085948	-0.208975	6.28505	-1.81308	0.0923	0.233	-5.92382	-0.334503	1.64316	-1.42871	0.222	0.519726	-5.65998	-1000	-1000	-1000	-1000	-1000	-1000	-1000	-1000	-1000	-1000	-1000	-1000	-1000	-1000	-1000	-1000	-1000	-1000	-1000	0	1	0	0	1	0	0	1	0
5260	6814	STXBP3	NM_007269	1	0	109090830	109153670	109090882	109153021	-0.245295	8.41257	-1.73659	0.105	0.257	-6.04146	0.920002	9.72721	2.69877	0.0505	0.29323	-4.11653	2350339	-0.166302	9.98612	-1.3435	0.218	0.269	-6.81478	-0.460118	7.72203	-4.88901	0.000816	0.00171	-1.30109	-0.53491	10.0455	-4.67696	0.00139	0.00291	-1.7625	0	0	1	0	0	1	0	1	0
[truncated: 23,328 more rows]
[truncated: 27 more columns]

## Sheet: Readme
HomoloGene_ID	HomoloGene ID	If -1: ID not found
Entrez_ID	Entrez Gene ID	If -1: ID not found
Gene	Gene Symbol
RefSeq	RefSeq ID
Chr	Chromosome (23 = X, 24 = Y)
strand	Gene's strand on the chromosome
[truncated: 71 more rows]
